# Supplementary material
Source: publisher figshare collection journal article supplement (https://karger.figshare.com/articles/dataset/_/26172289)
Supplement: Supplementary file 1 [file 1]

## Sheet: Cluster Genes - All Samples
Table S1	Cluster marker genes by adjusted p-value for each cluster in all samples
gene	p_val	avg_log2FC	pct.1	pct.2	p_val_adj	cluster
Gpx3	5.93243e-195	0.498644	0.985	0.886	8.86898e-191	0
Neat1	4.33845e-188	0.561992	0.921	0.814	6.48598e-184	0
Cmss1	8.20168e-158	0.353241	0.998	0.995	1.22615e-153	0
Gphn	2.89892e-135	0.402467	0.952	0.942	4.33388e-131	0
Slc34a1	9.96035e-134	0.491183	0.855	0.689	1.48907e-129	0
Slc8a1	6.58993e-129	0.828364	0.684	0.527	9.85194e-125	0
Magi2	1.02811e-128	0.634755	0.773	0.618	1.53703e-124	0
Zbtb20	2.75111e-124	0.395404	0.93	0.917	4.11291e-120	0
Esrrg	2.29987e-114	0.509835	0.797	0.628	3.4383e-110	0
Slc12a3	9.9755e-113	0.720227	0.636	0.48	1.49134e-108	0
Ghr	2.13262e-105	0.455457	0.803	0.687	3.18826e-101	0
Abcc2	2.71271e-99	0.518639	0.728	0.574	4.05551e-95	0
Kap	1.21913e-98	0.452045	0.821	0.683	1.8226e-94	0
Pkhd1	3.09383e-95	0.56373	0.679	0.536	4.62528e-91	0
Acsm2	6.4168e-92	0.515941	0.699	0.571	9.59312e-88	0
Slc12a1	3.1215e-91	0.640388	0.625	0.489	4.66665e-87	0
Ank3	1.10582e-83	0.523619	0.67	0.541	1.6532e-79	0
Pde4d	1.06856e-82	0.415128	0.81	0.751	1.5975e-78	0
Fxyd2	1.34729e-79	0.558966	0.593	0.482	2.0142e-75	0
Chd9	2.23954e-63	0.502614	0.713	0.685	3.34811e-59	0
Gm42397	3.56515e-63	0.466262	0.627	0.517	5.3299e-59	0
Fut9	3.22294e-61	0.440501	0.642	0.528	4.8183e-57	0
Trabd2b	1.17108e-60	0.460385	0.605	0.495	1.75077e-56	0
Slc27a2	1.66574e-58	0.427688	0.601	0.492	2.49027e-54	0
Col4a3	8.51813e-56	0.467079	0.628	0.559	1.27346e-51	0
Lrp2	1.96835e-55	0.495397	0.58	0.485	2.94269e-51	0
Ggt1	7.85551e-55	0.471947	0.601	0.52	1.1744e-50	0
Dab2	1.15122e-51	0.416082	0.667	0.619	1.72107e-47	0
Glis3	4.73412e-50	0.474433	0.55	0.46	7.07751e-46	0
Slc25a21	9.66465e-49	0.454342	0.554	0.463	1.44487e-44	0
Slc4a4	2.57023e-48	0.46945	0.545	0.459	3.84249e-44	0
Hnf1aos1	1.57715e-46	0.581232	0.443	0.356	2.35785e-42	0
Snx29	4.1636e-43	0.425865	0.589	0.523	6.22458e-39	0
Itpr1	9.76011e-42	0.438171	0.61	0.583	1.45914e-37	0
Prkn	1.57548e-41	0.527047	0.492	0.428	2.35535e-37	0
Col4a4	6.24445e-39	0.489614	0.492	0.43	9.33545e-35	0
Atp11a	2.7166e-38	0.503445	0.489	0.426	4.06131e-34	0
Ptprd	1.04236e-37	0.449026	0.528	0.459	1.55832e-33	0
Trps1	8.07172e-36	0.459043	0.484	0.421	1.20672e-31	0
Bicc1	7.70953e-35	0.528194	0.422	0.353	1.15257e-30	0
Erbb4	1.1804e-33	0.657516	0.387	0.327	1.7647e-29	0
Fhit	2.75214e-33	0.458635	0.484	0.42	4.11445e-29	0
Nedd4l	5.92025e-32	0.510662	0.449	0.4	8.85077e-28	0
Tns1	1.17427e-31	0.392074	0.643	0.666	1.75553e-27	0
Igf1r	1.56488e-30	0.411424	0.617	0.619	2.3395e-26	0
Erc2	1.62994e-30	0.443053	0.467	0.405	2.43677e-26	0
Ptprj	6.11216e-29	0.550436	0.429	0.384	9.13767e-25	0
Mecom	1.11788e-28	0.524064	0.51	0.489	1.67123e-24	0
Pth1r	1.89272e-27	0.406805	0.517	0.472	2.82962e-23	0
Nhs	4.58934e-27	0.414105	0.486	0.436	6.86106e-23	0
Gramd1b	7.58085e-27	0.461933	0.417	0.359	1.13334e-22	0
Rab11fip3	9.66802e-27	0.372025	0.519	0.477	1.44537e-22	0
Rbm47	1.05638e-26	0.489157	0.403	0.35	1.57929e-22	0
Cyp2j13	5.08949e-26	0.422532	0.397	0.336	7.60878e-22	0
Cyp2j5	4.71395e-25	0.451226	0.411	0.358	7.04735e-21	0
Kcnj15	8.73549e-25	0.444496	0.42	0.37	1.30596e-20	0
Gm47283	4.768e-24	0.418645	0.514	0.498	7.12816e-20	0
Sugct	1.77051e-22	0.433952	0.39	0.341	2.64691e-18	0
Dst	6.64862e-22	0.521036	0.415	0.39	9.93968e-18	0
Ddx5	2.42814e-20	0.341025	0.647	0.729	3.63007e-16	0
Plcl1	3.07997e-20	0.454608	0.382	0.342	4.60455e-16	0
Ppara	3.73905e-20	0.467972	0.387	0.344	5.58987e-16	0
Slc13a1	3.9729e-20	0.47368	0.363	0.32	5.93948e-16	0
Osbpl6	2.24772e-19	0.427943	0.386	0.344	3.36033e-15	0
Abca13	2.43767e-19	0.664506	0.253	0.207	3.64432e-15	0
Ndrg1	8.23913e-19	0.353858	0.539	0.547	1.23175e-14	0
Pcyt2	2.02006e-18	0.509079	0.347	0.312	3.01999e-14	0
Slc47a1	2.96639e-18	0.378411	0.41	0.37	4.43475e-14	0
Tfcp2l1	7.3518e-18	0.607493	0.257	0.215	1.09909e-13	0
Osbpl3	1.94762e-17	0.445394	0.349	0.31	2.91169e-13	0
Chpt1	2.42385e-17	0.420286	0.436	0.417	3.62365e-13	0
Mfsd4b5	2.70138e-17	0.405004	0.366	0.329	4.03856e-13	0
Lars2	3.03842e-17	0.288195	0.668	0.747	4.54244e-13	0
Egf	3.79524e-17	0.623748	0.301	0.263	5.67388e-13	0
P3h2	2.46381e-16	0.502326	0.306	0.268	3.6834e-12	0
Fggy	2.95717e-16	0.428698	0.366	0.33	4.42097e-12	0
Plxdc2	4.71484e-16	0.41116	0.383	0.351	7.04868e-12	0
Gk	5.65975e-16	0.448769	0.31	0.273	8.46132e-12	0
Arhgap24	7.4837e-16	0.421471	0.366	0.331	1.11881e-11	0
Smarca2	1.19692e-15	0.391804	0.458	0.454	1.7894e-11	0
Slc6a18	5.97068e-15	0.392138	0.356	0.32	8.92617e-11	0
Trim7	6.11379e-15	0.374662	0.346	0.306	9.14012e-11	0
Slco1a6	1.09794e-14	0.430668	0.309	0.271	1.64143e-10	0
Slc13a3	1.35046e-14	0.426347	0.329	0.297	2.01893e-10	0
Hgd	2.08951e-14	0.464746	0.292	0.256	3.12382e-10	0
Dach1	3.80315e-14	0.523707	0.33	0.303	5.68571e-10	0
Hnf1b	1.15259e-13	0.41329	0.325	0.29	1.72313e-09	0
Them7	2.69144e-13	0.409801	0.293	0.256	4.0237e-09	0
Mlxipl	2.70942e-13	0.453227	0.274	0.238	4.05059e-09	0
Atp1b1	3.81981e-13	0.417169	0.352	0.325	5.71061e-09	0
Setbp1	7.4796e-13	0.453602	0.317	0.287	1.1182e-08	0
Pkp4	3.62004e-12	0.405586	0.424	0.424	5.41196e-08	0
Bnc2	4.16149e-12	0.404655	0.303	0.271	6.22143e-08	0
Galnt14	5.77188e-12	0.4299	0.277	0.244	8.62896e-08	0
Thrb	8.86278e-12	0.383967	0.377	0.36	1.32499e-07	0
Slc22a30	2.98776e-11	0.396283	0.326	0.303	4.4667e-07	0
Phldb2	3.055e-11	0.405342	0.462	0.484	4.56722e-07	0
Macrod2	3.2635e-11	0.399567	0.352	0.335	4.87893e-07	0
Atp6v0a4	3.80043e-11	0.462144	0.277	0.25	5.68164e-07	0
Pdzk1	4.03007e-11	0.413614	0.311	0.286	6.02495e-07	0
Syne2	4.40328e-11	0.368762	0.489	0.513	6.58291e-07	0
Ranbp3l	4.92807e-11	0.49964	0.287	0.259	7.36747e-07	0
Dpyd	6.53801e-11	0.44791	0.258	0.229	9.77433e-07	0
Fhod3	7.55e-11	0.458495	0.284	0.257	1.12873e-06	0
Gpc4	1.12697e-10	0.385505	0.324	0.299	1.68481e-06	0
Pard3	1.35957e-10	0.441457	0.289	0.263	2.03255e-06	0
Shroom3	1.50986e-10	0.461409	0.297	0.274	2.25724e-06	0
Auts2	1.57819e-10	0.394324	0.334	0.312	2.35939e-06	0
Cgnl1	2.63634e-10	0.436702	0.347	0.336	3.94132e-06	0
Mapt	2.77362e-10	0.365569	0.384	0.372	4.14656e-06	0
Plekha7	3.37524e-10	0.416134	0.269	0.241	5.04599e-06	0
Slc17a3	3.42762e-10	0.365574	0.325	0.301	5.12429e-06	0
Tacc2	3.7442e-10	0.387358	0.346	0.329	5.59758e-06	0
Dennd1a	6.21376e-10	0.383453	0.445	0.467	9.28957e-06	0
Keg1	6.33421e-10	0.313736	0.347	0.322	9.46965e-06	0
Osbpl8	1.00965e-09	0.415504	0.402	0.407	1.50943e-05	0
Errfi1	1.17166e-09	0.407649	0.307	0.287	1.75163e-05	0
Rere	1.38136e-09	0.392156	0.483	0.531	2.06514e-05	0
Lactb2	5.50527e-09	0.376167	0.333	0.321	8.23038e-05	0
Hnf4a	5.70727e-09	0.370888	0.27	0.243	8.53237e-05	0
Kcnk5	5.97911e-09	0.36695	0.274	0.249	8.93877e-05	0
Fah	1.12683e-08	0.408751	0.251	0.227	0.000168461	0
Ptprk	1.5191e-08	0.35801	0.457	0.479	0.000227105	0
Fmn1	1.52247e-08	0.404188	0.282	0.261	0.000227609	0
Srrm2	1.56486e-08	0.351884	0.507	0.58	0.000233946	0
Pabpn1	1.79869e-08	0.41367	0.425	0.457	0.000268905	0
Kcnj16	5.34568e-08	0.378351	0.275	0.256	0.000799179	0
Hnf4aos	6.50891e-08	0.333828	0.298	0.276	0.000973082	0
Gcnt1	6.84239e-08	0.369231	0.331	0.324	0.00102294	0
Met	8.3272e-08	0.426179	0.26	0.242	0.00124492	0
Slc22a28	8.96865e-08	0.310099	0.315	0.295	0.00134081	0
Slc7a13	8.98019e-08	0.383629	0.258	0.237	0.00134254	0
Lrmda	9.9438e-08	0.355671	0.444	0.471	0.0014866	0
Wwox	1.29099e-07	0.358863	0.408	0.421	0.00193002	0
Msra	1.81479e-07	0.356918	0.306	0.295	0.00271311	0
Pdzrn3	1.97728e-07	0.339765	0.266	0.245	0.00295603	0
Ror1	3.1449e-07	0.386823	0.281	0.264	0.00470163	0
Nfia	3.32877e-07	0.290171	0.498	0.543	0.00497651	0
Cryl1	3.95754e-07	0.379143	0.262	0.245	0.00591652	0
Phactr1	4.2548e-07	0.5849	0.28	0.275	0.00636093	0
Magi2	0	0.782432	0.925	0.573	0	1
Slc8a1	0	0.660294	0.858	0.474	0	1
Kap	1.40824e-302	0.713977	0.948	0.646	2.10532e-298	1
Gpx3	4.69298e-286	0.616712	0.997	0.886	7.016e-282	1
Erbb4	6.89067e-266	0.62814	0.621	0.25	1.03016e-261	1
Slc12a1	3.33924e-250	0.58029	0.814	0.431	4.99216e-246	1
Egf	1.70329e-222	0.568906	0.506	0.195	2.54642e-218	1
Rbms3	1.43215e-213	0.571501	0.455	0.171	2.14106e-209	1
Dach1	1.54267e-207	0.551532	0.549	0.23	2.30629e-203	1
Abca13	1.41428e-205	0.582192	0.421	0.152	2.11435e-201	1
Ranbp3l	9.67511e-205	0.60833	0.487	0.193	1.44643e-200	1
Slc12a3	1.76012e-203	0.525854	0.783	0.437	2.63138e-199	1
Klk1	1.04845e-197	0.552012	0.413	0.151	1.56743e-193	1
Ank3	8.41019e-193	0.491983	0.845	0.487	1.25732e-188	1
Fxyd2	3.5014e-192	0.475264	0.787	0.421	5.23459e-188	1
Wwc1	4.03539e-188	0.4952	0.497	0.201	6.03291e-184	1
Robo2	7.3239e-187	0.627286	0.296	0.091	1.09492e-182	1
Pkhd1	1.20153e-186	0.458784	0.843	0.486	1.79629e-182	1
Abcc2	2.421e-182	0.470142	0.864	0.534	3.6194e-178	1
Plcl1	2.44503e-181	0.538356	0.588	0.274	3.65532e-177	1
Shroom3	7.25196e-178	0.498292	0.496	0.208	1.08417e-173	1
Phactr1	2.96966e-177	0.573713	0.473	0.21	4.43964e-173	1
Ptprd	2.2648e-175	0.46399	0.746	0.388	3.38588e-171	1
Fut9	1.08199e-174	0.412262	0.829	0.469	1.61758e-170	1
Setbp1	1.72198e-174	0.448543	0.52	0.22	2.57436e-170	1
Rgs6	1.81682e-173	0.516644	0.314	0.105	2.71615e-169	1
Tmem117	7.21973e-173	0.554058	0.322	0.111	1.07935e-168	1
Cacnb4	1.00288e-172	0.473871	0.391	0.148	1.49931e-168	1
Esrrg	1.78485e-167	0.421467	0.907	0.598	2.66836e-163	1
Ppara	9.76037e-167	0.473593	0.591	0.276	1.45918e-162	1
Iqgap2	2.28666e-165	0.51312	0.326	0.114	3.41855e-161	1
S100g	2.12108e-164	0.409066	0.287	0.094	3.17102e-160	1
Arhgap24	4.28038e-164	0.434854	0.574	0.262	6.39916e-160	1
Gm47283	1.17862e-163	0.504376	0.731	0.426	1.76203e-159	1
Fhod3	6.55247e-161	0.456995	0.467	0.196	9.79594e-157	1
Patj	1.53296e-160	0.390638	0.419	0.165	2.29177e-156	1
Bicc1	3.36904e-159	0.442693	0.61	0.292	5.03671e-155	1
Slit2	8.80881e-158	0.474985	0.289	0.096	1.31692e-153	1
Plxdc2	3.69535e-157	0.439877	0.594	0.281	5.52456e-153	1
Chka	4.22996e-157	0.450735	0.451	0.192	6.3238e-153	1
Atp6v0a4	7.33226e-157	0.405486	0.457	0.19	1.09617e-152	1
Paqr5	1.34567e-156	0.46836	0.336	0.123	2.01178e-152	1
Ptprj	2.58232e-156	0.407267	0.638	0.315	3.86057e-152	1
Aldob	4.36703e-156	0.4402	0.409	0.163	6.52871e-152	1
Nckap5	1.1884e-155	0.473983	0.332	0.121	1.77665e-151	1
Tfcp2l1	8.33238e-155	0.463017	0.408	0.165	1.24569e-150	1
Slc13a1	1.07773e-154	0.331683	0.561	0.254	1.6112e-150	1
Car12	1.61283e-154	0.425812	0.406	0.162	2.41118e-150	1
Gm42397	1.06633e-153	0.395666	0.803	0.462	1.59416e-149	1
Glis3	3.43924e-153	0.404562	0.745	0.398	5.14166e-149	1
P3h2	7.87613e-152	0.42452	0.481	0.21	1.17748e-147	1
Igsf11	1.42118e-150	0.405885	0.4	0.162	2.12467e-146	1
Itpr2	1.58773e-150	0.473051	0.554	0.284	2.37365e-146	1
Pard3b	1.85185e-150	0.511688	0.584	0.321	2.76852e-146	1
Gramd1b	8.45266e-150	0.354558	0.609	0.297	1.26367e-145	1
Phldb2	1.60097e-149	0.458165	0.695	0.405	2.39345e-145	1
Clmn	1.84891e-148	0.399602	0.368	0.142	2.76413e-144	1
Ccdc141	3.205e-148	0.472967	0.371	0.149	4.79148e-144	1
Osbpl6	4.41418e-148	0.35338	0.588	0.277	6.59921e-144	1
Sox6	7.76062e-148	0.455386	0.563	0.275	1.16021e-143	1
Rbm47	8.69752e-148	0.372208	0.601	0.285	1.30028e-143	1
Cmss1	1.14182e-146	0.363025	0.999	0.995	1.70703e-142	1
Kcnj16	1.27475e-146	0.356605	0.459	0.195	1.90575e-142	1
Pth1r	1.7579e-146	0.386919	0.739	0.398	2.62806e-142	1
Slc25a21	7.0963e-146	0.353304	0.746	0.401	1.0609e-141	1
Pde1a	9.2341e-146	0.409059	0.308	0.111	1.3805e-141	1
Mfsd4b5	1.16662e-145	0.357492	0.566	0.263	1.74409e-141	1
Nhs	1.55059e-145	0.355501	0.691	0.369	2.31813e-141	1
Wdr72	2.58422e-144	0.42081	0.379	0.152	3.86341e-140	1
Kng2	3.4039e-144	0.401517	0.382	0.153	5.08884e-140	1
Slc17a3	3.90934e-144	0.374557	0.522	0.236	5.84447e-140	1
Slc4a4	7.47571e-143	0.356807	0.738	0.398	1.11762e-138	1
Col4a3	7.89189e-143	0.371826	0.815	0.499	1.17984e-138	1
Shank2	3.17135e-142	0.363475	0.442	0.189	4.74117e-138	1
Ror1	4.90026e-142	0.385349	0.464	0.203	7.32588e-138	1
Ptprk	3.68674e-141	0.419741	0.692	0.399	5.51167e-137	1
Tacc2	8.96962e-141	0.379984	0.548	0.262	1.34096e-136	1
Hnf1aos1	5.83685e-140	0.289585	0.613	0.302	8.72609e-136	1
Mecom	6.14875e-140	0.425165	0.713	0.422	9.19239e-136	1
Ppargc1a	4.30988e-139	0.383559	0.354	0.14	6.44327e-135	1
Pax2	4.73738e-139	0.403189	0.301	0.109	7.08239e-135	1
Map7	4.822e-139	0.351405	0.419	0.177	7.20888e-135	1
Fhit	6.68638e-139	0.351147	0.681	0.355	9.99613e-135	1
Igsf5	1.30516e-138	0.363268	0.324	0.121	1.95122e-134	1
Cdkl1	4.2378e-138	0.49955	0.264	0.091	6.33551e-134	1
Palld	9.26208e-138	0.446065	0.295	0.109	1.38468e-133	1
Fmn1	4.79254e-137	0.328551	0.46	0.202	7.16485e-133	1
Col4a4	8.86189e-137	0.379185	0.684	0.367	1.32485e-132	1
Epb41l5	5.9339e-136	0.405844	0.305	0.114	8.87118e-132	1
Mapt	2.19725e-135	0.384816	0.592	0.302	3.28489e-131	1
Calb1	2.7106e-135	0.351551	0.281	0.1	4.05235e-131	1
Neat1	3.75183e-135	0.343067	0.966	0.803	5.60898e-131	1
Sugct	2.13996e-134	0.336721	0.575	0.28	3.19924e-130	1
Lrp2	2.29114e-134	0.336458	0.767	0.425	3.42526e-130	1
Trabd2b	6.94136e-132	0.29385	0.78	0.44	1.03773e-127	1
Tns3	7.25555e-132	0.426964	0.451	0.215	1.08471e-127	1
Bckdhb	6.05211e-131	0.376528	0.366	0.155	9.0479e-127	1
Cgnl1	8.21811e-131	0.365062	0.543	0.27	1.22861e-126	1
Kank1	1.49458e-130	0.409427	0.326	0.129	2.23439e-126	1
Met	1.97749e-130	0.396209	0.421	0.188	2.95635e-126	1
Ppm1h	2.01133e-130	0.400161	0.487	0.237	3.00694e-126	1
Cyp2j5	2.38585e-130	0.343997	0.596	0.298	3.56685e-126	1
Tln2	5.09929e-130	0.350376	0.406	0.179	7.62344e-126	1
Dst	6.58579e-130	0.407895	0.606	0.326	9.84576e-126	1
Pdzk1	1.9269e-129	0.303319	0.492	0.226	2.88071e-125	1
Tinag	6.05162e-129	0.316604	0.4	0.17	9.04717e-125	1
Lmo7	6.04442e-128	0.42297	0.429	0.201	9.0364e-124	1
Unc5c	6.20167e-128	0.39025	0.266	0.096	9.27149e-124	1
Slc43a2	1.56272e-127	0.381849	0.338	0.137	2.33626e-123	1
Pbld1	2.57446e-127	0.345176	0.316	0.122	3.84882e-123	1
Atp1b1	2.85877e-127	0.343035	0.54	0.262	4.27386e-123	1
Pawr	4.7982e-127	0.368859	0.363	0.152	7.17332e-123	1
Fggy	6.30858e-127	0.31561	0.553	0.268	9.43133e-123	1
Stk39	1.102e-126	0.443371	0.347	0.149	1.64749e-122	1
Myo5b	8.92564e-126	0.315051	0.378	0.159	1.33438e-121	1
Rab11fip3	9.28406e-126	0.337777	0.728	0.408	1.38797e-121	1
Prkn	1.45098e-125	0.355825	0.674	0.369	2.16922e-121	1
0610040J01Rik	1.71031e-125	0.385508	0.279	0.104	2.55691e-121	1
Igfbp7	1.92615e-125	0.3457	0.627	0.347	2.8796e-121	1
Ralgapa2	2.01891e-125	0.425252	0.41	0.192	3.01827e-121	1
Slc22a28	1.09227e-124	0.311693	0.501	0.233	1.63294e-120	1
Chd9	1.13896e-124	0.291072	0.866	0.634	1.70275e-120	1
Nedd4l	1.21771e-124	0.354157	0.63	0.34	1.82047e-120	1
Slc13a3	1.81946e-124	0.287884	0.506	0.238	2.7201e-120	1
Thrb	1.39755e-123	0.305917	0.578	0.292	2.08934e-119	1
Kcnj15	2.5129e-123	0.313169	0.613	0.306	3.75679e-119	1
Veph1	5.38337e-123	0.333391	0.367	0.155	8.04813e-119	1
Ext1	1.2422e-122	0.367156	0.592	0.325	1.8571e-118	1
Sord	1.32836e-122	0.295689	0.438	0.197	1.98589e-118	1
Cyp2j13	1.61557e-122	0.294537	0.567	0.281	2.41528e-118	1
Pard3	5.93406e-122	0.322006	0.452	0.209	8.87142e-118	1
Gpc4	9.52606e-122	0.272363	0.503	0.239	1.42415e-117	1
Egfr	2.39841e-121	0.291298	0.373	0.158	3.58562e-117	1
Sestd1	4.84458e-121	0.379922	0.308	0.125	7.24264e-117	1
Sox5	1.07507e-120	0.433791	0.319	0.133	1.60723e-116	1
Me3	3.71565e-120	0.393886	0.261	0.096	5.55489e-116	1
Rhobtb1	1.03989e-119	0.322519	0.516	0.259	1.55463e-115	1
Clcnkb	1.71778e-119	0.413769	0.253	0.092	2.56808e-115	1
Vwa8	1.74816e-119	0.3621	0.504	0.258	2.61351e-115	1
Dpyd	3.77399e-119	0.303514	0.407	0.18	5.64212e-115	1
Syne2	4.77433e-119	0.388251	0.703	0.439	7.13762e-115	1
Umod	7.22363e-119	0.340136	0.34	0.144	1.07993e-114	1
Klhl3	7.66833e-119	0.411481	0.281	0.11	1.14641e-114	1
Ptpn13	2.2789e-118	0.32349	0.368	0.158	3.40695e-114	1
Slc47a1	3.89815e-118	0.287284	0.606	0.306	5.82774e-114	1
Slc7a13	4.12815e-118	0.254187	0.415	0.184	6.17159e-114	1
Slc22a30	8.18971e-118	0.256903	0.51	0.242	1.22436e-113	1
Hgd	1.72142e-117	0.275458	0.447	0.205	2.57353e-113	1
Arhgap42	1.79005e-117	0.299244	0.437	0.2	2.67612e-113	1
Akr1c21	1.84962e-116	0.310127	0.373	0.162	2.76518e-112	1
Cubn	1.8925e-116	0.273483	0.352	0.148	2.82929e-112	1
Wwox	6.05284e-116	0.358037	0.618	0.349	9.04899e-112	1
Eps8	6.30948e-116	0.284335	0.355	0.151	9.43268e-112	1
Dapk1	1.24228e-115	0.347233	0.422	0.201	1.8572e-111	1
Auts2	1.31627e-115	0.284708	0.513	0.252	1.96783e-111	1
Galnt14	1.35589e-115	0.267918	0.429	0.194	2.02706e-111	1
Garem1	3.44195e-115	0.340346	0.277	0.108	5.14572e-111	1
Pde4d	3.51332e-115	0.272739	0.924	0.715	5.25241e-111	1
Sema5a	3.53601e-115	0.350124	0.322	0.135	5.28634e-111	1
Zeb2	4.71015e-115	0.363836	0.553	0.296	7.04167e-111	1
Trps1	5.27629e-115	0.266161	0.666	0.362	7.88806e-111	1
Vdr	8.27659e-115	0.316661	0.366	0.16	1.23735e-110	1
Camk1d	4.87697e-114	0.396693	0.903	0.737	7.29106e-110	1
G6pc	5.73668e-114	0.317447	0.268	0.101	8.57633e-110	1
Chpt1	8.12202e-114	0.322982	0.63	0.352	1.21424e-109	1
Slco1a6	1.45227e-113	0.259716	0.466	0.22	2.17114e-109	1
Pik3c2g	1.78632e-113	0.266341	0.378	0.165	2.67055e-109	1
Slc22a18	8.5165e-113	0.253194	0.409	0.183	1.27322e-108	1
Aoah	1.63949e-112	0.284881	0.383	0.169	2.45103e-108	1
Plekha7	1.6764e-112	0.270567	0.421	0.191	2.50621e-108	1
Prkag2	3.23454e-112	0.310188	0.358	0.158	4.83564e-108	1
Bnc2	4.41384e-112	0.258495	0.462	0.218	6.5987e-108	1
Aspa	5.15459e-112	0.27795	0.396	0.178	7.70611e-108	1
Errfi1	5.38051e-112	0.261147	0.476	0.23	8.04387e-108	1
Ccser1	5.63408e-112	0.307784	0.361	0.161	8.42295e-108	1
Slc22a23	6.77247e-112	0.289678	0.287	0.114	1.01248e-107	1
Naaladl2	7.74615e-112	0.325328	0.259	0.098	1.15805e-107	1
Adap2	1.1476e-111	0.340686	0.305	0.126	1.71566e-107	1
Zdhhc1	1.53929e-111	0.466664	0.326	0.148	2.30123e-107	1
Cpq	2.5261e-111	0.283031	0.371	0.165	3.77652e-107	1
Hoga1	3.94231e-111	0.332423	0.295	0.119	5.89376e-107	1
Pax8	4.50462e-111	0.286899	0.354	0.153	6.73441e-107	1
Itpr1	6.79415e-111	0.325954	0.787	0.524	1.01573e-106	1
Igf1r	1.02706e-110	0.311788	0.81	0.554	1.53545e-106	1
Folr1	1.07478e-110	0.295784	0.335	0.142	1.60679e-106	1
Pecr	1.62679e-110	0.283452	0.39	0.176	2.43204e-106	1
Retreg1	3.35363e-110	0.328957	0.278	0.11	5.01368e-106	1
Slc27a2	6.46365e-110	0.2806	0.765	0.44	9.66316e-106	1
Rab3ip	6.52781e-110	0.328552	0.367	0.166	9.75908e-106	1
Pah	7.52679e-110	0.254137	0.387	0.171	1.12526e-105	1
Mep1a	7.62274e-110	0.313035	0.306	0.126	1.1396e-105	1
Pabpn1	1.4784e-109	0.386252	0.63	0.387	2.21021e-105	1
Plekha6	2.00653e-109	0.29506	0.357	0.157	2.99976e-105	1
Pkp4	2.81447e-109	0.327812	0.626	0.356	4.20764e-105	1
Slc22a12	7.28025e-109	0.270511	0.333	0.141	1.0884e-104	1
Rora	8.09605e-109	0.357256	0.647	0.399	1.21036e-104	1
Adk	1.38447e-108	0.319645	0.424	0.206	2.06979e-104	1
Arhgef28	1.55806e-108	0.338883	0.496	0.264	2.32931e-104	1
Pdzrn3	4.19763e-108	0.265441	0.419	0.194	6.27546e-104	1
Myo1d	1.55333e-107	0.459824	0.433	0.234	2.32223e-103	1
St8sia1	1.90949e-107	0.294919	0.29	0.117	2.85469e-103	1
Snx29	2.08001e-107	0.27283	0.759	0.468	3.10961e-103	1
Slc34a1	2.3804e-107	0.26037	0.937	0.668	3.5587e-103	1
Mthfd1	8.83015e-107	0.348121	0.261	0.103	1.32011e-102	1
Dennd1a	1.74152e-106	0.349202	0.652	0.396	2.60357e-102	1
Stard10	2.90748e-106	0.298511	0.377	0.172	4.34668e-102	1
Tom1l2	3.83922e-106	0.382704	0.536	0.304	5.73963e-102	1
Col27a1	4.10771e-106	0.319329	0.272	0.108	6.14102e-102	1
Mgat5	7.65101e-106	0.370352	0.37	0.178	1.14383e-101	1
0610005C13Rik	1.01289e-105	0.250559	0.374	0.167	1.51427e-101	1
Diaph2	1.24861e-105	0.349381	0.411	0.204	1.86668e-101	1
Rufy3	5.14097e-105	0.270258	0.419	0.204	7.68575e-101	1
Prkca	6.78274e-105	0.359928	0.347	0.16	1.01402e-100	1
Eml5	1.12398e-104	0.256528	0.324	0.139	1.68035e-100	1
Oxct1	2.17127e-104	0.317409	0.478	0.25	3.24605e-100	1
Acsm2	2.78096e-104	0.272251	0.844	0.527	4.15754e-100	1
Cspp1	7.57973e-104	0.355822	0.416	0.212	1.13317e-99	1
Vegfa	3.54712e-103	0.349569	0.338	0.154	5.30294e-99	1
Cpeb3	3.72679e-103	0.326704	0.381	0.182	5.57155e-99	1
Golga4	5.93102e-103	0.328846	0.45	0.236	8.86688e-99	1
Ppp2r3a	6.59165e-103	0.340358	0.423	0.217	9.85452e-99	1
Map3k5	7.01807e-103	0.332123	0.505	0.278	1.0492e-98	1
Cers6	2.80143e-102	0.277287	0.327	0.143	4.18814e-98	1
Cryl1	3.24745e-102	0.267852	0.411	0.196	4.85494e-98	1
Lrba	4.89021e-102	0.374248	0.513	0.295	7.31086e-98	1
Hnf4g	1.64033e-101	0.259468	0.285	0.118	2.45229e-97	1
Aldh1l1	2.83507e-101	0.27853	0.336	0.148	4.23843e-97	1
Tns1	1.34908e-100	0.293988	0.823	0.604	2.01688e-96	1
Kif16b	3.29077e-100	0.317726	0.334	0.155	4.9197e-96	1
Cltrn	3.47423e-100	0.286636	0.278	0.115	5.19398e-96	1
Kidins220	3.6063e-100	0.326954	0.463	0.251	5.39142e-96	1
Hoxb6	1.34483e-99	0.378609	0.393	0.2	2.01053e-95	1
Msi2	5.49406e-99	0.372376	0.68	0.447	8.21362e-95	1
Me1	1.17979e-98	0.280667	0.275	0.114	1.76378e-94	1
Aadat	2.12854e-98	0.271373	0.257	0.104	3.18217e-94	1
Mir99ahg	3.09464e-98	0.313293	0.543	0.307	4.62649e-94	1
Stau2	4.34908e-98	0.306789	0.252	0.101	6.50188e-94	1
Aass	5.92457e-98	0.256542	0.295	0.125	8.85724e-94	1
Nuak2	1.05888e-97	0.265296	0.325	0.146	1.58302e-93	1
Arhgap32	1.44431e-97	0.285003	0.326	0.149	2.15924e-93	1
Acss1	1.97937e-97	0.355506	0.29	0.13	2.95916e-93	1
Trio	2.16968e-97	0.337053	0.504	0.29	3.24367e-93	1
Ggt1	6.60275e-97	0.254724	0.774	0.465	9.87111e-93	1
AC149090.1	4.62507e-96	0.330259	0.572	0.34	6.91447e-92	1
Arhgap6	6.15288e-95	0.273126	0.282	0.122	9.19855e-91	1
Arhgef10l	6.31753e-95	0.335203	0.276	0.119	9.44471e-91	1
Atxn1	6.54276e-95	0.305679	0.743	0.527	9.78143e-91	1
Macrod2	8.52738e-95	0.267446	0.519	0.28	1.27484e-90	1
Wnk4	8.98979e-95	0.281592	0.267	0.112	1.34397e-90	1
Fras1	2.73673e-94	0.25521	0.295	0.127	4.09141e-90	1
2210408F21Rik	3.11067e-94	0.316219	0.465	0.259	4.65046e-90	1
Itgb8	5.30925e-94	0.253432	0.266	0.11	7.93733e-90	1
Mylk	2.29917e-93	0.253941	0.488	0.266	3.43726e-89	1
Epb41	2.87393e-93	0.295625	0.52	0.294	4.29652e-89	1
Kansl1l	8.69728e-93	0.269571	0.462	0.25	1.30024e-88	1
Dnmt3a	9.67295e-93	0.339965	0.41	0.219	1.44611e-88	1
Eps8l2	1.35579e-92	0.276529	0.376	0.185	2.02691e-88	1
Nfyc	1.57124e-92	0.265844	0.442	0.233	2.349e-88	1
Pcca	2.60092e-92	0.299809	0.351	0.171	3.88838e-88	1
Dync2h1	3.9335e-92	0.317796	0.255	0.108	5.88058e-88	1
Prkcz	1.10832e-91	0.271916	0.276	0.12	1.65693e-87	1
Nos1ap	1.24116e-91	0.355559	0.304	0.144	1.85554e-87	1
Fam214a	1.31931e-91	0.254732	0.311	0.141	1.97237e-87	1
Tanc2	1.52204e-91	0.326352	0.57	0.342	2.27545e-87	1
Rere	5.71724e-91	0.317793	0.691	0.459	8.54727e-87	1
Lpgat1	1.58647e-90	0.280789	0.311	0.145	2.37177e-86	1
Vps13b	3.59597e-90	0.343277	0.48	0.276	5.37597e-86	1
Trim2	9.69092e-90	0.362153	0.303	0.144	1.44879e-85	1
Sil1	1.16338e-89	0.313969	0.273	0.123	1.73925e-85	1
Luc7l3	2.57076e-89	0.319636	0.546	0.333	3.84328e-85	1
St3gal3	3.55812e-89	0.305999	0.297	0.136	5.31939e-85	1
Gigyf2	4.88706e-89	0.342993	0.373	0.198	7.30615e-85	1
Plekha5	5.53298e-89	0.32767	0.331	0.164	8.2718e-85	1
Dmxl1	1.29151e-88	0.30804	0.434	0.241	1.9308e-84	1
Magi1	4.59108e-88	0.345296	0.554	0.338	6.86366e-84	1
Manba	7.02994e-88	0.275129	0.34	0.165	1.05098e-83	1
Tdrd3	8.30639e-87	0.334246	0.254	0.114	1.24181e-82	1
Selenbp1	1.07822e-86	0.285234	0.281	0.128	1.61195e-82	1
Pdzk1ip1	1.18904e-86	0.283395	0.263	0.115	1.77762e-82	1
Pam	3.94592e-86	0.315938	0.441	0.249	5.89915e-82	1
Trpm7	1.56251e-85	0.313459	0.48	0.283	2.33595e-81	1
Nr3c2	2.31422e-85	0.352178	0.376	0.203	3.45976e-81	1
Shb	7.58319e-85	0.331878	0.267	0.123	1.13369e-80	1
Kcnq1ot1	1.30744e-84	0.317765	0.35	0.179	1.95463e-80	1
Ncoa1	2.85936e-84	0.335102	0.378	0.206	4.27475e-80	1
Galnt18	6.58456e-84	0.274685	0.461	0.262	9.84391e-80	1
Fgd4	8.89521e-83	0.31398	0.316	0.157	1.32983e-78	1
Chchd3	1.10181e-82	0.280905	0.454	0.261	1.64721e-78	1
Nr6a1	2.68259e-82	0.294282	0.288	0.135	4.01048e-78	1
Farp1	4.22091e-82	0.326799	0.284	0.136	6.31026e-78	1
Vps13a	5.89743e-82	0.31104	0.359	0.191	8.81666e-78	1
Nfia	1.30065e-81	0.263811	0.703	0.472	1.94448e-77	1
Fto	2.27529e-81	0.26465	0.509	0.302	3.40156e-77	1
Arid1b	3.29628e-80	0.303094	0.547	0.346	4.92794e-76	1
Parp8	1.17899e-79	0.278101	0.257	0.117	1.76259e-75	1
Ldlrad3	4.20006e-79	0.254012	0.345	0.177	6.27908e-75	1
Ankhd1	1.17866e-78	0.31373	0.456	0.275	1.76209e-74	1
Fnbp1	2.07628e-78	0.333087	0.339	0.181	3.10403e-74	1
Pdss2	3.35862e-78	0.348732	0.252	0.118	5.02113e-74	1
Sh3d19	4.66464e-78	0.288835	0.423	0.241	6.97364e-74	1
Cachd1	5.27215e-78	0.315609	0.259	0.122	7.88186e-74	1
Prkg1	2.41058e-77	0.304617	0.519	0.325	3.60382e-73	1
Bcas3	3.85794e-77	0.277653	0.448	0.262	5.76763e-73	1
Pde4dip	4.27175e-77	0.289616	0.255	0.118	6.38627e-73	1
Zmynd8	8.13691e-77	0.343553	0.395	0.23	1.21647e-72	1
4930402H24Rik	1.53164e-76	0.324712	0.448	0.269	2.2898e-72	1
Maml3	1.53615e-76	0.379073	0.369	0.21	2.29655e-72	1
Snd1	3.15168e-76	0.303371	0.313	0.163	4.71177e-72	1
Phactr2	6.31234e-76	0.271271	0.507	0.311	9.43694e-72	1
Dock8	2.67262e-75	0.331617	0.273	0.134	3.99557e-71	1
Il31ra	1.40983e-74	0.30805	0.36	0.198	2.1077e-70	1
Mast4	5.14019e-73	0.260325	0.562	0.356	7.68458e-69	1
Scaper	7.11008e-73	0.316122	0.306	0.162	1.06296e-68	1
Pnisr	1.25287e-72	0.31695	0.529	0.339	1.87304e-68	1
Chd2	1.81738e-72	0.288225	0.394	0.226	2.71698e-68	1
Lars2	3.10839e-72	0.284421	0.855	0.681	4.64704e-68	1
Akap8l	3.27984e-72	0.285019	0.346	0.188	4.90336e-68	1
Gng12	4.27001e-72	0.284317	0.467	0.288	6.38366e-68	1
Shroom4	7.16403e-72	0.266031	0.398	0.231	1.07102e-67	1
Atp1a1	1.11155e-71	0.30692	0.549	0.365	1.66177e-67	1
Parva	3.91037e-71	0.355474	0.298	0.159	5.846e-67	1
Usp24	1.72028e-70	0.272158	0.301	0.157	2.57181e-66	1
Lrrc8d	1.92752e-70	0.254516	0.305	0.159	2.88165e-66	1
Pde7b	2.4642e-70	0.351202	0.301	0.162	3.68398e-66	1
Strbp	9.65021e-70	0.267041	0.353	0.196	1.44271e-65	1
Ddx17	1.27108e-69	0.260141	0.496	0.315	1.90026e-65	1
Wdfy3	1.31292e-69	0.277047	0.517	0.334	1.96282e-65	1
Arl15	1.66375e-69	0.265768	0.631	0.429	2.48731e-65	1
Map2k5	1.79882e-69	0.287886	0.309	0.165	2.68923e-65	1
Ssh2	5.30355e-69	0.311372	0.328	0.182	7.92881e-65	1
A330023F24Rik	5.64143e-69	0.268919	0.274	0.139	8.43394e-65	1
Upp2	7.78942e-69	0.25367	0.25	0.122	1.16452e-64	1
Ankrd17	1.43882e-68	0.296369	0.423	0.259	2.15103e-64	1
Dip2c	2.13104e-68	0.301873	0.464	0.29	3.18591e-64	1
Tnrc6a	3.98145e-68	0.251401	0.494	0.312	5.95227e-64	1
Aspscr1	4.07933e-68	0.286201	0.252	0.123	6.0986e-64	1
Safb2	8.93681e-68	0.31194	0.265	0.135	1.33605e-63	1
Thada	1.16002e-67	0.276063	0.268	0.136	1.73423e-63	1
Fbxl17	1.79065e-67	0.274197	0.536	0.348	2.67703e-63	1
Wnk1	1.82199e-67	0.277919	0.568	0.386	2.72387e-63	1
Gab2	2.00502e-67	0.269467	0.4	0.233	2.99751e-63	1
Myo10	2.84768e-67	0.323552	0.355	0.206	4.25728e-63	1
Rptor	3.23408e-67	0.269691	0.288	0.15	4.83494e-63	1
Zfp704	6.35979e-67	0.303733	0.282	0.147	9.50789e-63	1
Wls	1.62485e-66	0.31066	0.353	0.204	2.42915e-62	1
Gm19951	7.10892e-66	0.298608	0.649	0.457	1.06278e-61	1
Arfgef1	1.21982e-65	0.294775	0.37	0.219	1.82363e-61	1
Large1	1.29363e-65	0.320464	0.333	0.19	1.93397e-61	1
Exoc4	1.77947e-65	0.26404	0.536	0.354	2.66031e-61	1
Tcf7l2	4.98894e-65	0.314058	0.355	0.207	7.45847e-61	1
Gbf1	1.25825e-64	0.28791	0.348	0.201	1.88108e-60	1
Etv6	6.29803e-64	0.251754	0.443	0.276	9.41556e-60	1
Ggnbp2	7.58975e-64	0.262968	0.402	0.244	1.13467e-59	1
Ubn2	1.20143e-63	0.280859	0.459	0.294	1.79614e-59	1
Myo6	1.61832e-63	0.252641	0.621	0.429	2.41939e-59	1
Fndc3b	1.41792e-62	0.306434	0.397	0.246	2.11978e-58	1
Tbc1d5	1.42822e-62	0.256739	0.411	0.25	2.13519e-58	1
Irak2	4.1191e-62	0.263922	0.279	0.149	6.15806e-58	1
Nf1	4.79992e-62	0.258922	0.327	0.185	7.17589e-58	1
Trmt1l	5.50842e-62	0.282013	0.263	0.138	8.23508e-58	1
Phf21a	9.28096e-62	0.273399	0.437	0.276	1.3875e-57	1
Ncoa2	9.73599e-62	0.274513	0.42	0.261	1.45553e-57	1
Mbtd1	1.18099e-61	0.298815	0.259	0.136	1.76557e-57	1
Dlg1	4.85258e-61	0.308603	0.328	0.191	7.25461e-57	1
Nktr	2.1628e-60	0.256988	0.382	0.233	3.23339e-56	1
Rbm25	1.00339e-59	0.274232	0.496	0.333	1.50007e-55	1
Srek1	2.02304e-59	0.27886	0.413	0.258	3.02445e-55	1
Grina	2.24501e-59	0.262059	0.298	0.166	3.35628e-55	1
Ccnl2	4.87187e-59	0.262547	0.396	0.247	7.28345e-55	1
Kansl1	8.77315e-59	0.257015	0.501	0.338	1.31159e-54	1
Psme4	2.59299e-58	0.289959	0.321	0.186	3.87653e-54	1
Thsd7a	2.62181e-58	0.344808	0.323	0.191	3.9196e-54	1
Schip1	5.74008e-58	0.319412	0.265	0.148	8.58143e-54	1
Gon4l	7.47053e-58	0.304306	0.263	0.145	1.11684e-53	1
Rfx7	2.77036e-57	0.253408	0.262	0.141	4.14168e-53	1
Mertk	3.46432e-57	0.270169	0.354	0.216	5.17916e-53	1
Mllt10	9.61973e-57	0.265731	0.427	0.278	1.43815e-52	1
Usp34	1.34514e-56	0.268127	0.491	0.332	2.01099e-52	1
Cdkal1	7.66911e-56	0.253137	0.334	0.198	1.14653e-51	1
Tcn2	1.08129e-55	0.278186	0.423	0.275	1.61652e-51	1
Pan3	7.32905e-55	0.253416	0.408	0.264	1.09569e-50	1
Tmcc3	3.86525e-52	0.327017	0.317	0.194	5.77856e-48	1
Atad2b	7.66909e-51	0.265579	0.295	0.175	1.14653e-46	1
Nudt4	9.92236e-50	0.254751	0.274	0.16	1.48339e-45	1
Braf	4.62154e-47	0.260272	0.284	0.172	6.9092e-43	1
Setd5	3.02253e-46	0.257189	0.332	0.214	4.51869e-42	1
Fam193a	2.75545e-44	0.254216	0.286	0.177	4.1194e-40	1
Son	4.48676e-44	0.268655	0.642	0.496	6.7077e-40	1
Tex14	1.08723e-43	0.310789	0.288	0.18	1.6254e-39	1
Ano6	2.75943e-42	0.271629	0.342	0.228	4.12534e-38	1
Kif1b	1.91277e-38	0.271528	0.292	0.192	2.85959e-34	1
Myo1e	3.10589e-37	0.26719	0.326	0.224	4.6433e-33	1
Slc34a1	9.50596e-190	0.840827	0.833	0.713	1.42114e-185	2
Zbtb20	1.7091e-147	0.612725	0.928	0.919	2.55511e-143	2
Pde4d	4.60978e-139	0.765104	0.807	0.759	6.89162e-135	2
Neat1	1.16176e-121	0.584662	0.895	0.832	1.73683e-117	2
Acsm2	5.00524e-120	0.779566	0.698	0.585	7.48283e-116	2
Ghr	7.42634e-119	0.883336	0.787	0.703	1.11024e-114	2
Esrrg	1.26744e-111	0.683575	0.776	0.652	1.89482e-107	2
Slc27a2	5.03779e-98	0.861975	0.603	0.503	7.53149e-94	2
Dab2	2.27625e-96	0.88281	0.675	0.622	3.40299e-92	2
Trabd2b	1.12394e-80	0.832524	0.601	0.508	1.6803e-76	2
Ggt1	1.03971e-73	0.742268	0.597	0.53	1.55436e-69	2
Snx29	5.03553e-67	0.7984	0.588	0.531	7.52811e-63	2
Gpx3	1.01245e-63	0.362693	0.966	0.901	1.51362e-59	2
Rab11fip3	1.86718e-59	0.789135	0.534	0.479	2.79144e-55	2
Fut9	3.58984e-56	0.69948	0.605	0.549	5.36682e-52	2
Abcc2	8.08811e-56	0.613493	0.673	0.604	1.20917e-51	2
Lrp2	1.39588e-55	0.690104	0.56	0.5	2.08684e-51	2
Gm42397	5.48388e-53	0.687706	0.591	0.538	8.19841e-49	2
Erc2	7.43781e-53	0.796995	0.477	0.409	1.11195e-48	2
Igf1r	2.03858e-50	0.644775	0.619	0.618	3.04767e-46	2
Trim7	3.29299e-49	0.918493	0.379	0.303	4.92302e-45	2
Slc25a21	6.22831e-47	0.744612	0.525	0.479	9.31133e-43	2
Glis3	5.22928e-40	0.653248	0.521	0.477	7.81778e-36	2
Slc4a4	1.01962e-38	0.695415	0.515	0.476	1.52433e-34	2
Slc47a1	2.67331e-38	0.770383	0.424	0.372	3.99659e-34	2
Pth1r	3.22372e-37	0.638101	0.507	0.479	4.81947e-33	2
Atp11a	8.11975e-36	0.738198	0.467	0.438	1.2139e-31	2
Gphn	9.47083e-36	0.271889	0.909	0.954	1.41589e-31	2
Keg1	1.28419e-35	0.941923	0.373	0.318	1.91987e-31	2
Col4a3	1.71664e-35	0.616888	0.58	0.578	2.56638e-31	2
Chd9	1.65629e-34	0.486661	0.661	0.7	2.47615e-30	2
Hnf4aos	2.29715e-34	0.88407	0.331	0.271	3.43424e-30	2
Trps1	2.30714e-34	0.753892	0.464	0.433	3.44918e-30	2
Pkhd1	4.59229e-33	0.517139	0.604	0.57	6.86547e-29	2
Tns1	8.85717e-33	0.5752	0.616	0.67	1.32415e-28	2
Ank3	3.30815e-31	0.490161	0.604	0.571	4.94569e-27	2
Kcnj15	8.57514e-30	0.696308	0.413	0.377	1.28198e-25	2
Itpr1	1.34928e-29	0.594857	0.572	0.595	2.01717e-25	2
Fhit	1.35001e-29	0.663386	0.462	0.432	2.01826e-25	2
Nhs	1.26814e-27	0.720771	0.467	0.446	1.89587e-23	2
Kcnk5	2.09714e-27	0.902712	0.3	0.246	3.13523e-23	2
Them7	2.33447e-26	0.872519	0.309	0.257	3.49003e-22	2
Slc22a28	5.27062e-26	0.786426	0.336	0.293	7.87958e-22	2
Ndrg1	3.96945e-25	0.682771	0.515	0.552	5.93433e-21	2
Kap	8.67666e-25	0.297849	0.749	0.716	1.29716e-20	2
Slc6a18	4.12936e-22	0.785429	0.352	0.325	6.1734e-18	2
Hnf1b	9.12039e-22	0.803299	0.331	0.293	1.3635e-17	2
Cyp2j13	2.5811e-21	0.740471	0.376	0.348	3.85875e-17	2
Cyp2j5	7.57945e-21	0.655204	0.394	0.368	1.13313e-16	2
Osbpl3	1.03188e-20	0.754803	0.346	0.315	1.54266e-16	2
Mtus1	7.26366e-20	0.280412	0.167	0.287	1.08592e-15	2
Itgb6	2.70088e-19	0.825965	0.289	0.25	4.03781e-15	2
Cox16	1.75804e-18	0.250536	0.181	0.302	2.62827e-14	2
Ptprd	2.36286e-18	0.51586	0.482	0.478	3.53247e-14	2
Thrb	1.62267e-17	0.698346	0.374	0.362	2.4259e-13	2
Csgalnact1	7.42478e-17	0.313837	0.161	0.269	1.11001e-12	2
Ldc1	2.3833e-16	0.819513	0.272	0.236	3.56303e-12	2
Gramd1b	4.08113e-16	0.699936	0.387	0.373	6.10129e-12	2
Smarca2	9.18328e-16	0.722179	0.431	0.461	1.3729e-11	2
Ncoa7	1.64816e-15	0.272367	0.241	0.387	2.46399e-11	2
Srsf2	1.78117e-15	0.3095	0.205	0.33	2.66285e-11	2
Nfia	2.80464e-15	0.610725	0.483	0.542	4.19293e-11	2
Fggy	3.57576e-15	0.645915	0.351	0.337	5.34577e-11	2
Osbpl6	4.11257e-15	0.657624	0.364	0.354	6.1483e-11	2
Abcg2	7.22177e-15	0.272093	0.171	0.277	1.07965e-10	2
Zfand3	1.63104e-14	0.267932	0.223	0.355	2.4384e-10	2
Dleu2	1.83085e-14	0.294645	0.164	0.265	2.73712e-10	2
Slc17a3	2.82206e-14	0.655288	0.324	0.304	4.21898e-10	2
Sugct	3.84368e-14	0.675373	0.361	0.353	5.7463e-10	2
Gpc4	4.07369e-14	0.742399	0.321	0.303	6.09017e-10	2
Spag9	6.03479e-14	0.260985	0.268	0.428	9.02202e-10	2
Hnf4a	6.41725e-14	0.71034	0.273	0.245	9.59379e-10	2
Slc22a30	8.14732e-14	0.682675	0.322	0.307	1.21802e-09	2
Fah	9.31686e-14	0.755193	0.258	0.228	1.39287e-09	2
Wwc2	1.06284e-13	0.298493	0.242	0.381	1.58895e-09	2
Osbpl9	1.15166e-13	0.312262	0.208	0.332	1.72173e-09	2
Shroom4	1.57922e-13	0.261689	0.187	0.294	2.36093e-09	2
Sgms1	3.02866e-13	0.280934	0.199	0.313	4.52784e-09	2
Pdzrn3	3.24828e-13	0.730395	0.273	0.245	4.85617e-09	2
Col4a4	3.83907e-13	0.557163	0.433	0.451	5.73941e-09	2
Mkln1	9.4857e-13	0.30144	0.212	0.333	1.41811e-08	2
Tasor	3.82894e-12	0.290299	0.178	0.277	5.72427e-08	2
Pdzk1	4.64508e-12	0.662559	0.308	0.29	6.9444e-08	2
Lactb2	7.02117e-12	0.69401	0.329	0.324	1.04966e-07	2
Mllt10	1.1043e-11	0.303221	0.22	0.339	1.65092e-07	2
Prkn	1.26604e-11	0.503007	0.433	0.449	1.89274e-07	2
Tcn2	1.66711e-11	0.286135	0.218	0.335	2.49233e-07	2
Glyat	2.50451e-11	0.706891	0.255	0.233	3.74425e-07	2
Rbm47	3.31848e-11	0.561958	0.364	0.365	4.96112e-07	2
Chpt1	5.20174e-11	0.585494	0.405	0.427	7.77659e-07	2
Gbf1	5.27626e-11	0.280494	0.167	0.256	7.88801e-07	2
Bnc2	7.21958e-11	0.70436	0.29	0.277	1.07933e-06	2
Mlxipl	8.52398e-11	0.676048	0.264	0.244	1.27433e-06	2
Slc22a18	9.16388e-11	0.707133	0.256	0.236	1.37e-06	2
Sord	9.16571e-11	0.680951	0.271	0.254	1.37027e-06	2
Msra	9.65495e-11	0.761146	0.303	0.297	1.44341e-06	2
Gk	1.07324e-10	0.699463	0.293	0.281	1.60449e-06	2
Brd4	1.09698e-10	0.341298	0.2	0.306	1.63999e-06	2
Ogdh	1.26141e-10	0.334728	0.192	0.293	1.88581e-06	2
Etv6	1.27704e-10	0.276493	0.225	0.34	1.90917e-06	2
Auts2	1.2895e-10	0.640808	0.323	0.317	1.92781e-06	2
Itch	1.71238e-10	0.29817	0.203	0.307	2.56001e-06	2
Smg6	1.81819e-10	0.3044	0.188	0.285	2.71819e-06	2
Ppp6r3	2.84813e-10	0.32285	0.182	0.276	4.25796e-06	2
Rin2	4.65871e-10	0.322539	0.183	0.276	6.96477e-06	2
Lncpint	4.6651e-10	0.267767	0.273	0.41	6.97432e-06	2
Strbp	8.29643e-10	0.259955	0.168	0.251	1.24032e-05	2
Ccnl2	1.03282e-09	0.299757	0.203	0.304	1.54407e-05	2
Slco1a6	1.1103e-09	0.677093	0.29	0.28	1.6599e-05	2
Mfsd4b5	1.16801e-09	0.630761	0.338	0.34	1.74618e-05	2
Arhgap42	1.2517e-09	0.663262	0.272	0.257	1.8713e-05	2
Ubr5	1.54581e-09	0.286026	0.199	0.295	2.31098e-05	2
Pcyt2	2.36435e-09	0.627028	0.322	0.322	3.53471e-05	2
Pter	2.885e-09	0.693383	0.271	0.259	4.31308e-05	2
2210408F21Rik	3.74639e-09	0.284048	0.226	0.331	5.60086e-05	2
Galnt14	4.06228e-09	0.658068	0.266	0.251	6.07311e-05	2
Plekha7	4.52088e-09	0.630522	0.261	0.246	6.75871e-05	2
Rhobtb1	4.62619e-09	0.713401	0.32	0.325	6.91615e-05	2
Vps13d	5.3827e-09	0.319514	0.193	0.286	8.04713e-05	2
Ddx17	1.05844e-08	0.296628	0.26	0.385	0.000158237	2
Hoxb6	1.46861e-08	0.262777	0.182	0.265	0.000219558	2
Gcnt1	2.02304e-08	0.673137	0.319	0.327	0.000302445	2
Dmxl1	2.47315e-08	0.331945	0.211	0.308	0.000369736	2
Ccdc50	3.05698e-08	0.308549	0.219	0.318	0.000457018	2
Ivns1abp	3.08415e-08	0.316802	0.205	0.301	0.000461081	2
Fut8	4.1071e-08	0.343698	0.172	0.251	0.000614011	2
Atp2a2	5.4013e-08	0.328792	0.185	0.269	0.000807495	2
Mark3	1.13764e-07	0.363919	0.206	0.299	0.00170077	2
Slc13a1	1.85926e-07	0.621851	0.326	0.333	0.00277959	2
Vps13b	2.00176e-07	0.291319	0.243	0.348	0.00299264	2
Slc13a3	2.06989e-07	0.643502	0.303	0.306	0.00309449	2
Wwp1	2.94778e-07	0.392346	0.179	0.257	0.00440694	2
Tacc2	5.00439e-07	0.586914	0.325	0.336	0.00748156	2
Maf	6.05887e-07	0.648099	0.27	0.268	0.009058	2
Frmd4b	6.23757e-07	0.602902	0.406	0.462	0.00932517	2
Cpeb4	6.54798e-07	0.371392	0.193	0.276	0.00978923	2
Plvap	0	3.0113	0.996	0.169	0	3
Igfbp3	0	2.80303	0.764	0.114	0	3
Fabp4	0	2.74019	0.997	0.2	0	3
Esm1	0	2.69994	0.76	0.087	0	3
H2-D1	0	2.69185	0.999	0.233	0	3
Plpp3	0	2.65233	0.989	0.252	0	3
Rsad2	0	2.63487	0.973	0.163	0	3
B2m	0	2.62213	1	0.238	0	3
Ly6c1	0	2.60791	0.999	0.235	0	3
Ifitm3	0	2.54431	0.994	0.217	0	3
Tcim	0	2.53204	0.938	0.114	0	3
Rgcc	0	2.53127	0.943	0.115	0	3
Gpihbp1	0	2.52364	0.808	0.087	0	3
Emcn	0	2.48022	1	0.306	0	3
Id3	0	2.38641	0.96	0.162	0	3
H2-T23	0	2.3671	0.927	0.103	0	3
Plpp1	0	2.36346	0.989	0.301	0	3
Itm2b	0	2.35419	0.997	0.301	0	3
Igfbp5	0	2.34797	0.922	0.326	0	3
H2-K1	0	2.29467	0.996	0.276	0	3
Ly6a	0	2.27996	0.994	0.292	0	3
Srgn	0	2.26477	0.978	0.165	0	3
Gng11	0	2.25435	0.96	0.156	0	3
Ly6e	0	2.24845	0.999	0.298	0	3
Sparc	0	2.22112	0.993	0.2	0	3
Sox18	0	2.22101	0.905	0.098	0	3
Kdr	0	2.2146	0.971	0.174	0	3
Cd300lg	0	2.19314	0.934	0.111	0	3
Ubb	0	2.19014	0.999	0.214	0	3
Ifitm2	0	2.1598	0.989	0.184	0	3
Tm4sf1	0	2.14854	0.973	0.2	0	3
Klf2	0	2.13863	0.911	0.143	0	3
Flt1	0	2.13203	0.989	0.315	0	3
Cd81	0	2.10799	0.996	0.225	0	3
Bst2	0	2.10504	0.951	0.141	0	3
Fabp5	0	2.09711	0.726	0.063	0	3
Ppia	0	2.09509	1	0.239	0	3
Tmsb4x	0	2.08021	0.999	0.299	0	3
Ehd4	0	2.07878	0.975	0.188	0	3
Cd200	0	2.07201	0.936	0.146	0	3
Id1	0	2.03858	0.831	0.112	0	3
Rhob	0	2.03709	0.879	0.119	0	3
Gimap6	0	2.03119	0.949	0.146	0	3
Ramp2	0	2.02735	0.905	0.116	0	3
Cavin3	0	2.02207	0.898	0.108	0	3
Calm1	0	2.00518	0.993	0.218	0	3
Adgrl4	0	1.99835	0.983	0.242	0	3
Cd34	0	1.97333	0.9	0.107	0	3
Egfl7	0	1.96487	0.991	0.248	0	3
Marcks	0	1.93122	0.805	0.109	0	3
Sgk1	0	1.93117	0.841	0.15	0	3
Btnl9	0	1.93109	0.719	0.06	0	3
Laptm4a	0	1.92956	0.987	0.206	0	3
Ednrb	0	1.9292	0.699	0.057	0	3
Gnas	0	1.92468	0.996	0.307	0	3
Ifi44	0	1.91825	0.822	0.098	0	3
S100a10	0	1.91528	0.95	0.157	0	3
AW112010	0	1.91136	0.766	0.064	0	3
Psmb8	0	1.9026	0.877	0.1	0	3
H3f3a	0	1.9007	0.989	0.212	0	3
H3f3b	0	1.87963	0.984	0.207	0	3
Slc9a3r2	0	1.87954	0.976	0.209	0	3
Ramp3	0	1.8736	0.77	0.062	0	3
Gnai2	0	1.86326	0.975	0.191	0	3
H2-Q4	0	1.86179	0.831	0.081	0	3
Vamp5	0	1.85108	0.931	0.139	0	3
Fam167b	0	1.84667	0.793	0.063	0	3
Cd47	0	1.82509	0.941	0.167	0	3
Exoc3l2	0	1.81147	0.93	0.151	0	3
Eif1	0	1.80371	0.994	0.23	0	3
Serinc3	0	1.79934	0.982	0.236	0	3
Tinagl1	0	1.78502	0.774	0.097	0	3
Plscr2	0	1.7823	0.941	0.246	0	3
Cmtm8	0	1.77227	0.864	0.103	0	3
Cd9	0	1.75839	0.869	0.128	0	3
Tpt1	0	1.7528	0.998	0.366	0	3
Actb	0	1.75019	0.998	0.475	0	3
Selenom	0	1.73722	0.923	0.131	0	3
Myl12a	0	1.7329	0.909	0.126	0	3
Cdh5	0	1.7321	0.932	0.145	0	3
Esam	0	1.72799	0.909	0.123	0	3
Tek	0	1.72592	0.94	0.192	0	3
Txn1	0	1.72338	0.946	0.168	0	3
Dynll1	0	1.71773	0.917	0.15	0	3
Tnfsf10	0	1.68567	0.869	0.121	0	3
Rpl15	0	1.65835	0.86	0.105	0	3
Rps14	0	1.64846	0.996	0.26	0	3
Eng	0	1.64515	0.959	0.245	0	3
Hspb1	0	1.63842	0.913	0.156	0	3
Eva1b	0	1.63834	0.82	0.091	0	3
Gimap4	0	1.63524	0.833	0.104	0	3
Ctla2a	0	1.63114	0.771	0.114	0	3
Txnip	0	1.63053	0.932	0.184	0	3
Lmo2	0	1.62978	0.817	0.108	0	3
Rps23	0	1.62644	0.996	0.231	0	3
Rpl17	0	1.62578	0.991	0.229	0	3
Cyyr1	0	1.6241	0.931	0.2	0	3
Crip2	0	1.62248	0.946	0.169	0	3
Sparcl1	0	1.61994	0.563	0.091	0	3
Ifnar2	0	1.6178	0.886	0.127	0	3
Pcdh17	0	1.61436	0.742	0.131	0	3
Rpl9	0	1.61318	0.997	0.25	0	3
Icam2	0	1.61229	0.842	0.099	0	3
H2-Q7	0	1.61063	0.809	0.094	0	3
Arpc3	0	1.60906	0.893	0.118	0	3
Eef1a1	0	1.60613	1	0.353	0	3
Lims2	0	1.60415	0.847	0.134	0	3
Uba52	0	1.60323	0.991	0.266	0	3
Rpl19	0	1.60175	0.996	0.261	0	3
Slfn5	0	1.59888	0.901	0.151	0	3
Rps16	0	1.59709	0.994	0.238	0	3
Gng5	0	1.594	0.943	0.158	0	3
Actg1	0	1.59147	0.895	0.219	0	3
Psmb10	0	1.59133	0.75	0.07	0	3
Tnfaip2	0	1.58984	0.855	0.143	0	3
Rpl27a	0	1.58093	0.996	0.257	0	3
S100a13	0	1.57446	0.955	0.17	0	3
AU021092	0	1.57318	0.779	0.103	0	3
Rpl10	0	1.57149	0.975	0.211	0	3
Col4a1	0	1.56962	0.949	0.232	0	3
Selenof	0	1.56847	0.89	0.119	0	3
Cfl1	0	1.56289	0.887	0.133	0	3
Tmsb10	0	1.56124	0.844	0.134	0	3
Iigp1	0	1.56055	0.494	0.052	0	3
Npr3	0	1.55291	0.515	0.074	0	3
Rpl34	0	1.55268	0.994	0.225	0	3
Psme1	0	1.55085	0.864	0.123	0	3
Ptma	0	1.55017	0.999	0.29	0	3
Rflnb	0	1.54885	0.727	0.085	0	3
Dram1	0	1.54844	0.702	0.057	0	3
Mef2c	0	1.54569	0.915	0.184	0	3
Rps27	0	1.54497	1	0.28	0	3
Pecam1	0	1.5411	0.967	0.225	0	3
Rps21	0	1.53763	0.999	0.275	0	3
Rps5	0	1.53268	0.982	0.212	0	3
Nrp1	0	1.52814	0.99	0.42	0	3
Rpl37a	0	1.52804	0.998	0.29	0	3
Arhgap31	0	1.52416	0.938	0.187	0	3
Kank3	0	1.52165	0.82	0.1	0	3
Rhoa	0	1.52138	0.957	0.199	0	3
Btf3	0	1.52119	0.88	0.114	0	3
Rps7	0	1.5129	0.976	0.194	0	3
Hes1	0	1.51184	0.645	0.095	0	3
Rps18	0	1.51057	0.99	0.223	0	3
Hmgb1	0	1.5098	0.975	0.217	0	3
Fkbp1a	0	1.50896	0.896	0.151	0	3
Rpl18	0	1.5079	0.982	0.218	0	3
Tie1	0	1.50147	0.863	0.128	0	3
Psmb9	0	1.49818	0.692	0.063	0	3
Ccdc85b	0	1.49757	0.872	0.12	0	3
Rps6	0	1.49746	0.935	0.165	0	3
Tmem204	0	1.49711	0.788	0.096	0	3
Rps4x	0	1.49462	0.983	0.212	0	3
Rpl32	0	1.49109	0.994	0.237	0	3
Rpl7	0	1.49079	0.97	0.198	0	3
Rpl30	0	1.48623	0.99	0.22	0	3
Ier5	0	1.48368	0.692	0.061	0	3
Elk3	0	1.48333	0.905	0.167	0	3
Thrsp	0	1.48324	0.641	0.036	0	3
Ifi203	0	1.4822	0.824	0.133	0	3
Jup	0	1.47803	0.806	0.113	0	3
Rps11	0	1.47425	0.989	0.228	0	3
Rps8	0	1.47416	0.997	0.319	0	3
Cd38	0	1.4736	0.686	0.069	0	3
Il10rb	0	1.4732	0.805	0.095	0	3
Tuba1a	0	1.46969	0.633	0.054	0	3
Tmem59	0	1.46929	0.891	0.146	0	3
Ptprb	0	1.46841	0.982	0.273	0	3
Rpl26	0	1.46791	0.992	0.25	0	3
Rps12	0	1.46525	0.99	0.265	0	3
Hspg2	0	1.45914	0.848	0.129	0	3
Isg15	0	1.45892	0.471	0.048	0	3
Btg1	0	1.45883	0.856	0.131	0	3
S100a16	0	1.45802	0.836	0.116	0	3
Cd93	0	1.4562	0.802	0.103	0	3
Ets2	0	1.45487	0.724	0.09	0	3
Mmrn2	0	1.45414	0.826	0.114	0	3
Rpl23	0	1.45158	0.998	0.279	0	3
Tbxa2r	0	1.44595	0.64	0.048	0	3
Rack1	0	1.44242	0.939	0.185	0	3
Meox1	0	1.43532	0.634	0.047	0	3
Thbd	0	1.4349	0.656	0.076	0	3
Rpl35a	0	1.43307	0.996	0.25	0	3
Slc43a3	0	1.43218	0.688	0.076	0	3
Rps10	0	1.43008	0.991	0.249	0	3
Rps15a	0	1.42878	0.989	0.241	0	3
Rplp1	0	1.42667	0.997	0.34	0	3
Rpl7a	0	1.42223	0.903	0.152	0	3
Apoe	0	1.42222	0.799	0.163	0	3
Kctd12b	0	1.42091	0.583	0.066	0	3
Rps19	0	1.41718	0.992	0.282	0	3
Rps13	0	1.41714	0.979	0.218	0	3
Kitl	0	1.41641	0.782	0.169	0	3
Rabac1	0	1.41586	0.91	0.16	0	3
Rpl11	0	1.41351	0.983	0.247	0	3
Myl12b	0	1.41181	0.909	0.172	0	3
Rpl35	0	1.40804	0.973	0.222	0	3
Rpl6	0	1.40755	0.984	0.236	0	3
Gngt2	0	1.40667	0.754	0.101	0	3
Rps29	0	1.40491	1	0.322	0	3
Selenok	0	1.40487	0.868	0.124	0	3
Rpl24	0	1.39862	0.983	0.239	0	3
Rplp2	0	1.39771	0.982	0.231	0	3
Ifit3	0	1.39458	0.482	0.039	0	3
Chrm3	0	1.39152	0.864	0.273	0	3
Rps24	0	1.39038	0.999	0.31	0	3
Mndal	0	1.38994	0.847	0.156	0	3
Snrpb	0	1.38931	0.815	0.104	0	3
Rpl27	0	1.38827	0.964	0.186	0	3
Tmem88	0	1.38799	0.578	0.033	0	3
Rps25	0	1.38498	0.968	0.218	0	3
Rpl39	0	1.38429	0.986	0.22	0	3
Rps3a1	0	1.38215	0.99	0.212	0	3
Rpl37	0	1.38021	0.997	0.315	0	3
Ppib	0	1.37986	0.873	0.144	0	3
Sem1	0	1.37956	0.885	0.144	0	3
Cd151	0	1.37884	0.66	0.057	0	3
Atox1	0	1.37833	0.936	0.196	0	3
Jun	0	1.37797	0.647	0.094	0	3
Selenow	0	1.37639	0.903	0.166	0	3
Ecscr	0	1.36998	0.689	0.075	0	3
Anxa5	0	1.36886	0.834	0.118	0	3
Rpl22	0	1.36648	0.953	0.194	0	3
Rps27a	0	1.36603	0.992	0.255	0	3
Rpl29	0	1.35723	0.95	0.191	0	3
Sumo2	0	1.35617	0.884	0.139	0	3
AY036118	0	1.35263	0.975	0.333	0	3
Rps3	0	1.35216	0.989	0.219	0	3
Gnb2	0	1.35088	0.856	0.138	0	3
Clec14a	0	1.34909	0.662	0.077	0	3
Ifi27	0	1.34496	0.75	0.103	0	3
Podxl	0	1.34421	0.952	0.254	0	3
Anxa3	0	1.3437	0.787	0.109	0	3
Rps2	0	1.34195	0.968	0.236	0	3
Serpinh1	0	1.34048	0.728	0.088	0	3
Anxa2	0	1.34025	0.849	0.147	0	3
Pfn1	0	1.33941	0.879	0.152	0	3
Tcf4	0	1.33681	0.989	0.416	0	3
Pbx1	0	1.33672	0.996	0.692	0	3
Tubb5	0	1.3358	0.702	0.082	0	3
Arpc1b	0	1.33554	0.752	0.09	0	3
Rpl23a	0	1.33372	0.859	0.14	0	3
Rras	0	1.33336	0.711	0.077	0	3
Rplp0	0	1.33225	0.939	0.194	0	3
Psme2	0	1.33209	0.696	0.077	0	3
Rpl18a	0	1.32923	0.985	0.307	0	3
Nfkbia	0	1.32778	0.735	0.102	0	3
Clic1	0	1.32649	0.856	0.141	0	3
Irx3	0	1.32527	0.574	0.051	0	3
Gapdh	0	1.32433	0.813	0.115	0	3
Robo4	0	1.32322	0.641	0.053	0	3
Gm12002	0	1.32316	0.534	0.037	0	3
Cst3	0	1.3228	0.978	0.251	0	3
Tuba1b	0	1.31288	0.702	0.079	0	3
Elob	0	1.30417	0.913	0.169	0	3
Gimap1	0	1.30396	0.728	0.087	0	3
Rpl3	0	1.30251	0.959	0.218	0	3
Meis2	0	1.30048	0.992	0.46	0	3
Ets1	0	1.29992	0.863	0.163	0	3
Tagln2	0	1.29945	0.757	0.107	0	3
Myct1	0	1.29655	0.692	0.083	0	3
Zfp36l1	0	1.29586	0.839	0.154	0	3
Rpl12	0	1.29409	0.92	0.177	0	3
Pomp	0	1.29332	0.769	0.112	0	3
Rpl13	0	1.29184	0.998	0.377	0	3
Tgfbr2	0	1.29058	0.83	0.156	0	3
F2r	0	1.289	0.588	0.057	0	3
Rapgef5	0	1.2873	0.83	0.148	0	3
Slfn2	0	1.28461	0.546	0.051	0	3
Calcrl	0	1.28189	0.87	0.17	0	3
Ptpru	0	1.27903	0.631	0.069	0	3
Gimap5	0	1.27722	0.623	0.065	0	3
Cav2	0	1.27717	0.639	0.061	0	3
Oaz1	0	1.27584	0.847	0.135	0	3
Fam43a	0	1.27367	0.615	0.05	0	3
Rhoc	0	1.27235	0.693	0.088	0	3
Map1lc3b	0	1.27162	0.771	0.107	0	3
Smco4	0	1.27153	0.772	0.107	0	3
Uqcrb	0	1.27036	0.832	0.12	0	3
Mgll	0	1.26871	0.795	0.162	0	3
Rps17	0	1.26739	0.932	0.208	0	3
Rps9	0	1.26664	0.971	0.233	0	3
Rps28	0	1.26486	0.98	0.218	0	3
Adgrf5	0	1.26398	0.936	0.222	0	3
Rap1b	0	1.26365	0.83	0.153	0	3
Rasgrp3	0	1.26016	0.822	0.142	0	3
Rdx	0	1.25939	0.94	0.279	0	3
Tmem50a	0	1.25864	0.773	0.105	0	3
Rps20	0	1.25598	0.993	0.263	0	3
Ndufa4	0	1.25596	0.942	0.197	0	3
Fau	0	1.25582	0.999	0.393	0	3
Tspo	0	1.25211	0.824	0.125	0	3
Rpl8	0	1.24678	0.985	0.288	0	3
Klf7	0	1.24619	0.859	0.176	0	3
1810037I17Rik	0	1.24214	0.762	0.099	0	3
Rpl21	0	1.24168	0.991	0.297	0	3
Ppp1r2	0	1.24066	0.8	0.124	0	3
Serf2	0	1.24019	0.956	0.214	0	3
Krtcap2	0	1.23835	0.732	0.091	0	3
Irf7	0	1.23581	0.537	0.045	0	3
3110099E03Rik	0	1.23493	0.529	0.057	0	3
Pde2a	0	1.23446	0.729	0.102	0	3
Tnfrsf1a	0	1.23328	0.634	0.058	0	3
Rac1	0	1.2294	0.856	0.148	0	3
4931406P16Rik	0	1.22832	0.858	0.165	0	3
Cdc42	0	1.22556	0.883	0.172	0	3
Dusp3	0	1.22499	0.718	0.109	0	3
Bvht	0	1.22282	0.582	0.058	0	3
Rasip1	0	1.21762	0.699	0.083	0	3
Lgals9	0	1.21727	0.617	0.069	0	3
Kctd12	0	1.21717	0.612	0.068	0	3
Chchd10	0	1.21639	0.425	0.067	0	3
Gbp7	0	1.21538	0.576	0.066	0	3
Tspan12	0	1.21361	0.699	0.086	0	3
Ccrl2	0	1.21031	0.513	0.04	0	3
Rps26	0	1.20892	0.953	0.2	0	3
Ywhab	0	1.2087	0.79	0.137	0	3
Sh3bgrl3	0	1.20314	0.809	0.119	0	3
Tomm7	0	1.20147	0.793	0.118	0	3
H2-T22	0	1.19989	0.548	0.044	0	3
Gabarapl2	0	1.19878	0.732	0.1	0	3
Calm2	0	1.19805	0.885	0.172	0	3
Prkch	0	1.19384	0.821	0.171	0	3
Cmpk2	0	1.1926	0.527	0.048	0	3
Ltbp4	0	1.19119	0.677	0.104	0	3
Grrp1	0	1.1902	0.528	0.042	0	3
Cldn15	0	1.18578	0.584	0.053	0	3
Ostf1	0	1.18175	0.815	0.131	0	3
Cox7a2	0	1.18146	0.904	0.187	0	3
Slc50a1	0	1.17494	0.622	0.072	0	3
Ushbp1	0	1.17365	0.748	0.114	0	3
Ldb2	0	1.17305	0.896	0.27	0	3
Ost4	0	1.17246	0.741	0.099	0	3
Ctsl	0	1.17221	0.799	0.125	0	3
Lrrc8c	0	1.1699	0.731	0.108	0	3
Col15a1	0	1.16853	0.566	0.064	0	3
Xaf1	0	1.16833	0.576	0.059	0	3
Tmem140	0	1.16741	0.649	0.079	0	3
Ece1	0	1.1655	0.815	0.146	0	3
Tceal9	0	1.16179	0.582	0.062	0	3
H2afz	0	1.16015	0.764	0.106	0	3
Ndufc2	0	1.15872	0.72	0.095	0	3
S100a11	0	1.15793	0.79	0.125	0	3
Gnb1	0	1.15737	0.91	0.2	0	3
Rassf9	0	1.15421	0.504	0.051	0	3
Ripply3	0	1.15149	0.518	0.037	0	3
Psma7	0	1.14975	0.815	0.142	0	3
Tmem176b	0	1.14696	0.792	0.149	0	3
Cox8a	0	1.14624	0.934	0.218	0	3
Ptprm	0	1.14407	0.928	0.3	0	3
Naca	0	1.14344	0.887	0.181	0	3
Dysf	0	1.14262	0.824	0.16	0	3
Snrk	0	1.13975	0.772	0.139	0	3
Rpl36a	0	1.13907	0.902	0.177	0	3
Clic5	0	1.13857	0.859	0.199	0	3
Efnb2	0	1.13808	0.713	0.123	0	3
Mrfap1	0	1.13445	0.706	0.088	0	3
Tprgl	0	1.13419	0.645	0.076	0	3
Snx3	0	1.13335	0.808	0.144	0	3
Arf5	0	1.13286	0.786	0.116	0	3
Rtp4	0	1.13173	0.511	0.04	0	3
Rpl36	0	1.13087	0.991	0.334	0	3
Atp5j	0	1.13025	0.888	0.17	0	3
Ran	0	1.12414	0.616	0.065	0	3
Rpl14	0	1.12237	0.909	0.2	0	3
Phf11d	0	1.12158	0.467	0.04	0	3
Igf1	0	1.12137	0.373	0.047	0	3
Pmp22	0	1.11737	0.49	0.037	0	3
Cnbp	0	1.11581	0.806	0.139	0	3
Rapgef4	0	1.1105	0.832	0.183	0	3
Fmnl3	0	1.10644	0.716	0.106	0	3
Ltbp1	0	1.10413	0.691	0.119	0	3
Irf1	0	1.10383	0.543	0.052	0	3
Ndufa7	0	1.10378	0.748	0.125	0	3
Rnf144a	0	1.10371	0.688	0.101	0	3
Snrpg	0	1.10259	0.731	0.103	0	3
Cdc42ep2	0	1.10251	0.527	0.039	0	3
Pdgfb	0	1.10059	0.729	0.132	0	3
Psma2	0	1.0989	0.699	0.09	0	3
Sub1	0	1.09094	0.663	0.088	0	3
Eef1b2	0	1.08884	0.757	0.115	0	3
Cbfa2t3	0	1.08851	0.671	0.109	0	3
Cox7c	0	1.08648	0.889	0.191	0	3
Rpl5	0	1.08621	0.888	0.208	0	3
Epas1	0	1.08608	0.925	0.237	0	3
Chchd2	0	1.08467	0.964	0.267	0	3
Arf1	0	1.08401	0.77	0.133	0	3
Prkar1a	0	1.08399	0.772	0.13	0	3
Ubl5	0	1.08384	0.767	0.121	0	3
Grasp	0	1.08382	0.527	0.048	0	3
Rnaset2a	0	1.08212	0.638	0.078	0	3
Rpl4	0	1.0814	0.805	0.14	0	3
Tspan15	0	1.07912	0.603	0.064	0	3
Notch1	0	1.07756	0.635	0.095	0	3
Fam117b	0	1.07697	0.855	0.194	0	3
Sh3glb1	0	1.07318	0.862	0.187	0	3
Gm10076	0	1.07303	0.818	0.161	0	3
Mal	0	1.06897	0.594	0.118	0	3
Clic4	0	1.0688	0.913	0.245	0	3
Tap2	0	1.06449	0.562	0.058	0	3
B230219D22Rik	0	1.06265	0.709	0.111	0	3
Clec1a	0	1.06236	0.571	0.077	0	3
Tpm4	0	1.06205	0.677	0.114	0	3
F8	0	1.06169	0.557	0.088	0	3
Clec2d	0	1.06143	0.82	0.182	0	3
Arpc5	0	1.05793	0.68	0.091	0	3
Ifit1	0	1.05778	0.35	0.036	0	3
Cpd	0	1.05573	0.757	0.133	0	3
Mapk3	0	1.05414	0.634	0.079	0	3
Atp6v1g1	0	1.05242	0.742	0.108	0	3
Tpst2	0	1.05069	0.598	0.067	0	3
Gbp2	0	1.05052	0.426	0.028	0	3
Cox6b1	0	1.04915	0.874	0.176	0	3
Efna1	0	1.049	0.636	0.077	0	3
Msn	0	1.048	0.826	0.163	0	3
Sptssa	0	1.04715	0.593	0.075	0	3
Hint1	0	1.0464	0.84	0.15	0	3
Chst2	0	1.04564	0.38	0.02	0	3
Rps27l	0	1.04546	0.721	0.104	0	3
Parp14	0	1.0441	0.583	0.08	0	3
Ndufa8	0	1.03946	0.661	0.086	0	3
Smdt1	0	1.03269	0.742	0.122	0	3
Tubb4b	0	1.03181	0.58	0.066	0	3
Aplp2	0	1.02946	0.902	0.242	0	3
Plxnd1	0	1.02836	0.639	0.099	0	3
Emc7	0	1.02779	0.607	0.07	0	3
Ifit2	0	1.02539	0.356	0.029	0	3
Gas6	0	1.02493	0.801	0.191	0	3
Itpkb	0	1.02462	0.804	0.173	0	3
Edf1	0	1.02357	0.764	0.126	0	3
Rnf7	0	1.02235	0.589	0.065	0	3
Lama4	0	1.02165	0.558	0.064	0	3
Tmem14c	0	1.02061	0.647	0.083	0	3
Aplnr	0	1.01996	0.294	0.011	0	3
Psmb1	0	1.01956	0.731	0.113	0	3
Cox5a	0	1.01844	0.742	0.105	0	3
Ywhah	0	1.01555	0.579	0.072	0	3
Jund	0	1.01548	0.612	0.131	0	3
Ndufa1	0	1.01334	0.668	0.083	0	3
Hnrnpa0	0	1.01141	0.633	0.08	0	3
Tgfb1	0	1.01021	0.571	0.066	0	3
H2-Q6	0	1.01007	0.629	0.087	0	3
Psmb3	0	1.00709	0.708	0.104	0	3
Itgb1	0	1.00679	0.909	0.237	0	3
Atp5j2	0	1.00453	0.861	0.183	0	3
Sp100	0	1.00013	0.725	0.138	0	3
Heg1	0	0.999262	0.821	0.199	0	3
S100a6	0	0.998843	0.709	0.156	0	3
Myo1c	0	0.99803	0.702	0.117	0	3
Slc25a4	0	0.997242	0.672	0.094	0	3
Dll4	0	0.996971	0.437	0.039	0	3
Bri3	0	0.996748	0.758	0.114	0	3
Edil3	0	0.996203	0.37	0.03	0	3
Atp5h	0	0.995707	0.882	0.194	0	3
Sh3bp5	0	0.994868	0.754	0.151	0	3
Tax1bp3	0	0.991436	0.513	0.047	0	3
Arpc2	0	0.991325	0.836	0.187	0	3
Jam3	0	0.991072	0.538	0.062	0	3
Hnrnpk	0	0.990318	0.783	0.153	0	3
Camk1	0	0.987583	0.505	0.047	0	3
Upp1	0	0.987528	0.46	0.042	0	3
Rpl36al	0	0.987179	0.746	0.124	0	3
Scarb1	0	0.986333	0.461	0.045	0	3
Sox4	0	0.984887	0.368	0.04	0	3
Eif3f	0	0.984887	0.641	0.088	0	3
Cd24a	0	0.984269	0.584	0.11	0	3
Drap1	0	0.98362	0.573	0.067	0	3
Cdc42ep1	0	0.983498	0.526	0.06	0	3
Klf4	0	0.983163	0.462	0.07	0	3
Ndufb1-ps	0	0.981742	0.715	0.11	0	3
Tpm3	0	0.981059	0.812	0.167	0	3
Gabarap	0	0.98054	0.822	0.162	0	3
Plekho1	0	0.979913	0.569	0.071	0	3
Arhgef15	0	0.978575	0.655	0.092	0	3
Arap3	0	0.976741	0.629	0.084	0	3
Pcbp1	0	0.975233	0.6	0.077	0	3
S1pr1	0	0.973741	0.562	0.082	0	3
Ptp4a3	0	0.973017	0.471	0.049	0	3
Ndufb11	0	0.972611	0.709	0.108	0	3
Shank3	0	0.970309	0.641	0.101	0	3
Hnrnpf	0	0.970144	0.717	0.125	0	3
Slc3a2	0	0.970006	0.575	0.081	0	3
Ddah2	0	0.968719	0.52	0.059	0	3
Nedd8	0	0.967327	0.751	0.132	0	3
Prdx1	0	0.966908	0.891	0.235	0	3
Psenen	0	0.966813	0.591	0.074	0	3
Trim47	0	0.965978	0.54	0.065	0	3
Sap18	0	0.965646	0.567	0.066	0	3
Ywhaq	0	0.965361	0.755	0.136	0	3
BC028528	0	0.965181	0.446	0.028	0	3
Snu13	0	0.964856	0.52	0.054	0	3
Fzd4	0	0.964175	0.569	0.074	0	3
Rbx1	0	0.96356	0.763	0.142	0	3
Cox7a2l	0	0.963099	0.663	0.094	0	3
Ccdc85a	0	0.962408	0.428	0.048	0	3
Oasl2	0	0.961503	0.419	0.043	0	3
Dad1	0	0.961395	0.699	0.111	0	3
Pfdn5	0	0.960801	0.856	0.183	0	3
Dpm3	0	0.960656	0.603	0.087	0	3
Clta	0	0.959068	0.78	0.149	0	3
Plscr1	0	0.957646	0.613	0.095	0	3
Mcc	0	0.951852	0.808	0.219	0	3
Rer1	0	0.950213	0.548	0.057	0	3
Mfge8	0	0.949195	0.73	0.119	0	3
Chmp2a	0	0.946393	0.72	0.126	0	3
Shisa5	0	0.946379	0.644	0.098	0	3
Atxn7l3b	0	0.94537	0.624	0.098	0	3
Npm1	0	0.944594	0.673	0.104	0	3
Epha4	0	0.944263	0.511	0.073	0	3
Psmb6	0	0.943179	0.635	0.086	0	3
Adgrl2	0	0.943051	0.801	0.197	0	3
H2afv	0	0.940987	0.654	0.101	0	3
Bloc1s1	0	0.940875	0.612	0.085	0	3
Hras	0	0.940759	0.605	0.076	0	3
Ndufb9	0	0.940343	0.766	0.131	0	3
Tmed5	0	0.940304	0.524	0.062	0	3
Pnrc1	0	0.940002	0.567	0.072	0	3
Sec61b	0	0.938234	0.583	0.071	0	3
Sec61g	0	0.937657	0.709	0.118	0	3
Lamp1	0	0.936218	0.856	0.19	0	3
Ppp1r11	0	0.934383	0.538	0.064	0	3
Chst15	0	0.93413	0.417	0.033	0	3
Rnaset2b	0	0.93377	0.562	0.07	0	3
Cyp20a1	0	0.933332	0.56	0.069	0	3
Spcs1	0	0.930608	0.523	0.06	0	3
Cox6c	0	0.929841	0.921	0.234	0	3
Cetn3	0	0.92893	0.55	0.069	0	3
Sdcbp	0	0.928776	0.599	0.078	0	3
Cox17	0	0.928604	0.64	0.097	0	3
Eif5a	0	0.926473	0.705	0.112	0	3
Tmem256	0	0.924513	0.564	0.065	0	3
Klf13	0	0.922308	0.73	0.136	0	3
Sbds	0	0.919423	0.531	0.063	0	3
Rnasek	0	0.919088	0.734	0.13	0	3
Cdk2ap1	0	0.917933	0.476	0.047	0	3
Ifi47	0	0.917916	0.366	0.022	0	3
Slc25a5	0	0.91405	0.65	0.095	0	3
H1f0	0	0.914047	0.5	0.07	0	3
Saraf	0	0.912873	0.628	0.086	0	3
Atp5g2	0	0.9119	0.764	0.143	0	3
Srp14	0	0.90998	0.584	0.084	0	3
Snrpe	0	0.909214	0.556	0.075	0	3
Acer2	0	0.908082	0.507	0.067	0	3
Amotl1	0	0.907881	0.606	0.097	0	3
Abi3	0	0.904532	0.485	0.045	0	3
Lrrc8a	0	0.904046	0.564	0.065	0	3
Prdx2	0	0.904035	0.61	0.083	0	3
Jam2	0	0.903586	0.501	0.067	0	3
Lrrc3b	0	0.903498	0.424	0.053	0	3
She	0	0.902613	0.51	0.06	0	3
Plk2	0	0.902155	0.347	0.034	0	3
Fgd5	0	0.899704	0.757	0.148	0	3
Grcc10	0	0.897271	0.689	0.11	0	3
Prdx4	0	0.897137	0.457	0.041	0	3
Sox17	0	0.895803	0.542	0.103	0	3
Ccnd2	0	0.8943	0.564	0.099	0	3
Rheb	0	0.893454	0.694	0.109	0	3
Stom	0	0.892617	0.44	0.044	0	3
Plac8	0	0.891025	0.407	0.046	0	3
6430548M08Rik	0	0.888125	0.436	0.043	0	3
Cavin2	0	0.887846	0.521	0.087	0	3
Gm4951	0	0.887002	0.348	0.038	0	3
Npc2	0	0.886001	0.65	0.093	0	3
Cdc14a	0	0.885329	0.714	0.165	0	3
Capza2	0	0.884113	0.624	0.089	0	3
Ybx1	0	0.883409	0.868	0.21	0	3
Fli1	0	0.882988	0.822	0.212	0	3
F11r	0	0.88257	0.774	0.158	0	3
Chmp5	0	0.882444	0.559	0.072	0	3
Caskin2	0	0.882304	0.489	0.055	0	3
Bnip3l	0	0.88156	0.657	0.116	0	3
Smagp	0	0.880386	0.542	0.062	0	3
Emp3	0	0.879164	0.457	0.059	0	3
Txndc17	0	0.876859	0.573	0.075	0	3
Atp6v1f	0	0.876494	0.672	0.108	0	3
Leprot	0	0.876422	0.518	0.06	0	3
Nid1	0	0.875503	0.482	0.058	0	3
Cav1	0	0.874785	0.501	0.066	0	3
Ephb4	0	0.873613	0.569	0.078	0	3
Anp32a	0	0.87313	0.742	0.143	0	3
Smim11	0	0.872419	0.5	0.059	0	3
Tcf15	0	0.869859	0.337	0.027	0	3
Smpdl3a	0	0.867826	0.571	0.084	0	3
Dnaja1	0	0.86701	0.735	0.161	0	3
Pdcd5	0	0.865898	0.53	0.069	0	3
Set	0	0.865417	0.589	0.093	0	3
Crip1	0	0.864166	0.772	0.156	0	3
Ifi35	0	0.863932	0.498	0.06	0	3
Higd2a	0	0.863063	0.489	0.056	0	3
Hsbp1	0	0.862742	0.56	0.079	0	3
Tmem176a	0	0.862717	0.728	0.16	0	3
Morf4l1	0	0.862675	0.737	0.147	0	3
Adgre5	0	0.86114	0.582	0.094	0	3
Psmb4	0	0.860272	0.604	0.084	0	3
Mxd4	0	0.859447	0.767	0.162	0	3
Exoc3l4	0	0.859175	0.433	0.038	0	3
Spcs2	0	0.85901	0.586	0.083	0	3
Entpd1	0	0.85739	0.502	0.075	0	3
Sfr1	0	0.855656	0.488	0.061	0	3
Romo1	0	0.854778	0.6	0.092	0	3
Gbp4	0	0.854358	0.374	0.039	0	3
Flt4	0	0.854248	0.416	0.038	0	3
Ndufb3	0	0.853473	0.589	0.089	0	3
Abhd17a	0	0.852874	0.532	0.062	0	3
Psmb2	0	0.852548	0.64	0.097	0	3
Dhrs7	0	0.852367	0.438	0.041	0	3
Pea15a	0	0.851022	0.564	0.078	0	3
Pttg1	0	0.85043	0.547	0.077	0	3
Ptgs1	0	0.849485	0.456	0.044	0	3
Tomm6	0	0.849352	0.677	0.116	0	3
Ciao2b	0	0.848327	0.427	0.041	0	3
Sema7a	0	0.847754	0.385	0.041	0	3
Oaz2	0	0.845786	0.521	0.077	0	3
Psmb5	0	0.845581	0.582	0.079	0	3
Dctn3	0	0.845288	0.519	0.058	0	3
Fscn1	0	0.844543	0.33	0.021	0	3
Cox5b	0	0.840593	0.833	0.178	0	3
Ehd3	0	0.840383	0.583	0.094	0	3
Timm10b	0	0.838589	0.533	0.071	0	3
Rpl31	0	0.83772	0.869	0.21	0	3
Tmed9	0	0.837494	0.661	0.103	0	3
Pdia6	0	0.837145	0.607	0.091	0	3
Selenop	0	0.836256	0.728	0.149	0	3
Pura	0	0.834238	0.67	0.121	0	3
Sh2d3c	0	0.833576	0.436	0.04	0	3
Ctnnb1	0	0.833245	0.842	0.198	0	3
Uqcc2	0	0.833157	0.675	0.127	0	3
Tjp1	0	0.832703	0.758	0.171	0	3
Inpp4b	0	0.830564	0.67	0.153	0	3
2023-09-07	0	0.830317	0.74	0.151	0	3
Dusp1	0	0.830056	0.467	0.065	0	3
Rtl8a	0	0.830024	0.421	0.055	0	3
Arhgap29	0	0.829758	0.806	0.207	0	3
Fundc2	0	0.82963	0.492	0.061	0	3
Aldoa	0	0.828584	0.788	0.18	0	3
Sypl	0	0.827659	0.717	0.141	0	3
Dynlrb1	0	0.826793	0.566	0.08	0	3
Cox6a1	0	0.8267	0.768	0.158	0	3
Eid1	0	0.825557	0.484	0.06	0	3
Taldo1	0	0.824236	0.612	0.086	0	3
Hyal2	0	0.823151	0.447	0.05	0	3
Sppl2a	0	0.822675	0.609	0.103	0	3
Mtch1	0	0.822572	0.731	0.149	0	3
Psma5	0	0.822224	0.517	0.063	0	3
Lats2	0	0.821287	0.64	0.112	0	3
Plaat3	0	0.819582	0.43	0.049	0	3
Rhoj	0	0.81947	0.624	0.106	0	3
Ssr4	0	0.819145	0.573	0.078	0	3
Tmed10	0	0.818929	0.692	0.129	0	3
Tmem30a	0	0.818083	0.74	0.157	0	3
Tm2d2	0	0.815968	0.417	0.031	0	3
Xiap	0	0.815454	0.74	0.166	0	3
Rpl22l1	0	0.811922	0.581	0.099	0	3
1700025G04Rik	0	0.810341	0.516	0.089	0	3
Dek	0	0.810093	0.544	0.091	0	3
Vdac2	0	0.809081	0.609	0.09	0	3
Nol7	0	0.808458	0.512	0.077	0	3
Gja1	0	0.808348	0.291	0.03	0	3
Nme2	0	0.806888	0.84	0.202	0	3
Irgm1	0	0.806568	0.362	0.031	0	3
Cggbp1	0	0.805247	0.489	0.066	0	3
Lpcat1	0	0.804976	0.434	0.047	0	3
Zeb1	0	0.80473	0.724	0.174	0	3
Pnp	0	0.804707	0.408	0.04	0	3
Eif1b	0	0.803992	0.461	0.055	0	3
Dok4	0	0.80382	0.363	0.023	0	3
Gbp9	0	0.803448	0.343	0.029	0	3
Cracr2b	0	0.802507	0.405	0.042	0	3
Ggta1	0	0.801675	0.409	0.04	0	3
Uqcrh	0	0.801131	0.798	0.169	0	3
Inka1	0	0.80038	0.357	0.023	0	3
Imp3	0	0.799909	0.449	0.058	0	3
Atp6v0e	0	0.799542	0.626	0.103	0	3
Tapbp	0	0.799334	0.67	0.131	0	3
Rab11a	0	0.798987	0.618	0.107	0	3
Tmed2	0	0.798567	0.591	0.092	0	3
Nrp2	0	0.798554	0.573	0.11	0	3
Reep5	0	0.798125	0.591	0.087	0	3
Lmcd1	0	0.797595	0.468	0.065	0	3
Reep3	0	0.797069	0.794	0.2	0	3
Trim37	0	0.79673	0.579	0.087	0	3
Irf2bpl	0	0.795298	0.416	0.045	0	3
Snrpf	0	0.793445	0.514	0.073	0	3
Dpysl2	0	0.79264	0.571	0.088	0	3
Eif3k	0	0.791707	0.597	0.091	0	3
Tmbim1	0	0.791692	0.46	0.058	0	3
Eif4h	0	0.791008	0.584	0.086	0	3
Crispld1	0	0.790697	0.391	0.053	0	3
Sav1	0	0.790464	0.505	0.066	0	3
Efnb1	0	0.790323	0.431	0.049	0	3
Mrpl17	0	0.789921	0.413	0.046	0	3
Atp5l	0	0.789216	0.86	0.206	0	3
Luzp1	0	0.788455	0.797	0.205	0	3
Serinc1	0	0.786775	0.608	0.101	0	3
Mrpl33	0	0.786762	0.575	0.097	0	3
Rab18	0	0.785847	0.531	0.073	0	3
Tspan4	0	0.785349	0.475	0.054	0	3
Piezo2	0	0.784485	0.485	0.087	0	3
Sema3f	0	0.784183	0.451	0.054	0	3
Sema6a	0	0.780571	0.699	0.153	0	3
Tma7	0	0.78033	0.6	0.096	0	3
Syf2	0	0.779909	0.615	0.098	0	3
Fyn	0	0.778838	0.631	0.116	0	3
Sncg	0	0.777844	0.423	0.063	0	3
Rflna	0	0.777522	0.307	0.018	0	3
Unc50	0	0.776894	0.402	0.036	0	3
Grap	0	0.77513	0.361	0.029	0	3
Itm2c	0	0.774797	0.478	0.063	0	3
Arf4	0	0.773509	0.62	0.103	0	3
Polr2e	0	0.773379	0.531	0.075	0	3
Snapc5	0	0.773268	0.416	0.043	0	3
Marcksl1	0	0.773191	0.282	0.015	0	3
Hip1	0	0.772006	0.76	0.186	0	3
Map7d1	0	0.771932	0.476	0.062	0	3
Rbm8a	0	0.769952	0.534	0.078	0	3
Ndufs5	0	0.769304	0.464	0.056	0	3
Eif4g2	0	0.76928	0.842	0.219	0	3
Nmi	0	0.76899	0.46	0.054	0	3
Rwdd1	0	0.768504	0.475	0.069	0	3
Dazap2	0	0.768324	0.538	0.074	0	3
Vamp3	0	0.767642	0.429	0.05	0	3
Pttg1ip	0	0.767557	0.647	0.115	0	3
Mrps14	0	0.766576	0.46	0.054	0	3
Vps29	0	0.765736	0.523	0.068	0	3
Lgals3bp	0	0.765396	0.442	0.055	0	3
Serbp1	0	0.764971	0.781	0.186	0	3
Klf3	0	0.764804	0.693	0.147	0	3
Pola2	0	0.76444	0.366	0.028	0	3
Crlf2	0	0.763292	0.348	0.026	0	3
Irx5	0	0.763224	0.275	0.016	0	3
Tomm22	0	0.762649	0.446	0.05	0	3
Sri	0	0.762498	0.591	0.103	0	3
Fas	0	0.762149	0.488	0.07	0	3
Cwc15	0	0.76076	0.505	0.067	0	3
Tmco1	0	0.75975	0.528	0.088	0	3
Akt3	0	0.759487	0.631	0.134	0	3
Supt4a	0	0.759354	0.428	0.047	0	3
Ifngr1	0	0.758598	0.521	0.064	0	3
Polr2f	0	0.756934	0.493	0.063	0	3
Erg	0	0.756865	0.654	0.135	0	3
Zfand5	0	0.756685	0.651	0.125	0	3
Endod1	0	0.755964	0.409	0.041	0	3
Eef1g	0	0.75582	0.638	0.117	0	3
Adarb1	0	0.753972	0.467	0.064	0	3
Ier2	0	0.753176	0.36	0.038	0	3
Vdac3	0	0.753162	0.561	0.092	0	3
Cd274	0	0.752876	0.3	0.023	0	3
Nop10	0	0.75277	0.454	0.061	0	3
Ctsz	0	0.752376	0.613	0.101	0	3
Pltp	0	0.751742	0.417	0.06	0	3
Nova2	0	0.751087	0.401	0.045	0	3
Cmtm3	0	0.749541	0.341	0.023	0	3
Rarg	0	0.749117	0.47	0.057	0	3
Pim3	0	0.749089	0.464	0.065	0	3
Bzw1	0	0.74885	0.505	0.072	0	3
Tnfsf12	0	0.748661	0.394	0.036	0	3
Psma3	0	0.748361	0.71	0.144	0	3
Ndufa13	0	0.748021	0.747	0.147	0	3
Ginm1	0	0.748012	0.446	0.048	0	3
Bag5	0	0.747486	0.377	0.035	0	3
Adam10	0	0.747366	0.693	0.148	0	3
Manf	0	0.746996	0.484	0.067	0	3
Rell1	0	0.746734	0.467	0.065	0	3
Nxpe4	0	0.746647	0.439	0.066	0	3
Vwa1	0	0.746373	0.305	0.02	0	3
C430049B03Rik	0	0.745372	0.306	0.028	0	3
Erh	0	0.744493	0.432	0.048	0	3
Scand1	0	0.741798	0.615	0.108	0	3
Ldha	0	0.741771	0.691	0.143	0	3
AU020206	0	0.741469	0.459	0.072	0	3
Vezf1	0	0.741466	0.492	0.076	0	3
Ranbp1	0	0.740508	0.447	0.056	0	3
Rtp3	0	0.739913	0.327	0.024	0	3
Capns1	0	0.739648	0.661	0.131	0	3
Vps28	0	0.738651	0.458	0.057	0	3
Svbp	0	0.738303	0.384	0.037	0	3
Mfng	0	0.738134	0.324	0.025	0	3
Ndufb4	0	0.737733	0.492	0.061	0	3
Ier3ip1	0	0.737438	0.53	0.083	0	3
Hypk	0	0.73729	0.564	0.088	0	3
Ywhae	0	0.736963	0.826	0.201	0	3
Snrpd2	0	0.735755	0.512	0.078	0	3
Fam110a	0	0.735323	0.337	0.029	0	3
Tmem165	0	0.735227	0.422	0.046	0	3
Mospd2	0	0.735214	0.498	0.088	0	3
Eif3i	0	0.735106	0.45	0.053	0	3
Dusp7	0	0.735022	0.342	0.03	0	3
Sipa1	0	0.734652	0.455	0.057	0	3
Gimap8	0	0.734022	0.411	0.049	0	3
Arl1	0	0.733434	0.457	0.051	0	3
Tril	0	0.733344	0.306	0.025	0	3
D8Ertd738e	0	0.733287	0.714	0.14	0	3
Atp5md	0	0.732136	0.656	0.119	0	3
Gm20559	0	0.732064	0.381	0.043	0	3
Atraid	0	0.73146	0.536	0.072	0	3
Dnajc3	0	0.7308	0.656	0.126	0	3
Eif3h	0	0.730143	0.589	0.095	0	3
Rtraf	0	0.729344	0.489	0.061	0	3
Nxn	0	0.72922	0.626	0.121	0	3
Pdia5	0	0.727071	0.401	0.06	0	3
Sumo3	0	0.725708	0.446	0.055	0	3
Naa20	0	0.72455	0.56	0.081	0	3
Srsf9	0	0.724465	0.431	0.05	0	3
Unc45b	0	0.723594	0.371	0.039	0	3
H2-M3	0	0.723191	0.333	0.028	0	3
Abcg1	0	0.722172	0.337	0.026	0	3
Ppp1ca	0	0.721567	0.728	0.147	0	3
Polr2k	0	0.721126	0.422	0.055	0	3
Tlnrd1	0	0.719376	0.335	0.026	0	3
Cdc37	0	0.718537	0.538	0.085	0	3
Klhl6	0	0.717798	0.384	0.04	0	3
Rab14	0	0.716778	0.749	0.162	0	3
Itprip	0	0.715623	0.349	0.03	0	3
Ssb	0	0.714942	0.61	0.116	0	3
Kdelr2	0	0.714896	0.429	0.047	0	3
Ggh	0	0.713334	0.374	0.04	0	3
Sft2d1	0	0.712979	0.464	0.06	0	3
Npdc1	0	0.71268	0.437	0.047	0	3
Tspan18	0	0.7125	0.518	0.085	0	3
Yipf4	0	0.711396	0.503	0.067	0	3
Car8	0	0.711265	0.294	0.03	0	3
Bcap31	0	0.709962	0.521	0.074	0	3
Ehd2	0	0.709066	0.486	0.071	0	3
Igtp	0	0.708328	0.268	0.021	0	3
Gstp1	0	0.707996	0.378	0.041	0	3
Zfp366	0	0.707591	0.506	0.088	0	3
Lamtor5	0	0.706857	0.464	0.061	0	3
Scn1b	0	0.705684	0.339	0.024	0	3
Gm11707	0	0.704124	0.257	0.008	0	3
Boc	0	0.703885	0.389	0.048	0	3
Irgm2	0	0.703331	0.285	0.023	0	3
Mrps33	0	0.702729	0.476	0.07	0	3
Pop5	0	0.702299	0.46	0.059	0	3
Ces2e	0	0.701769	0.287	0.019	0	3
Tmem109	0	0.701452	0.395	0.045	0	3
Actr2	0	0.700846	0.584	0.111	0	3
Bax	0	0.700838	0.564	0.088	0	3
Ifit3b	0	0.699794	0.256	0.016	0	3
Polr2j	0	0.699575	0.438	0.05	0	3
Gimap9	0	0.698941	0.359	0.037	0	3
Lamc1	0	0.696756	0.533	0.092	0	3
Ube2l6	0	0.695435	0.288	0.021	0	3
Brk1	0	0.694998	0.591	0.1	0	3
Filip1	0	0.694709	0.384	0.056	0	3
Coa3	0	0.693265	0.451	0.059	0	3
Dstn	0	0.692264	0.644	0.127	0	3
Tmem258	0	0.691696	0.395	0.05	0	3
Trir	0	0.691277	0.681	0.14	0	3
Ndufa5	0	0.69104	0.595	0.099	0	3
Gtf2h5	0	0.690929	0.442	0.059	0	3
Pgrmc1	0	0.690523	0.478	0.064	0	3
Anapc11	0	0.690141	0.406	0.051	0	3
Sh2b3	0	0.68988	0.349	0.039	0	3
Lamtor2	0	0.689787	0.463	0.069	0	3
Tbrg1	0	0.689682	0.46	0.059	0	3
Aurkaip1	0	0.689036	0.454	0.054	0	3
Hist3h2a	0	0.689014	0.328	0.034	0	3
Atp5e	0	0.688848	0.868	0.225	0	3
Med28	0	0.688613	0.533	0.082	0	3
Tmem184b	0	0.687875	0.46	0.06	0	3
Srp19	0	0.68772	0.402	0.057	0	3
Trappc4	0	0.687421	0.414	0.046	0	3
Calr	0	0.687401	0.686	0.15	0	3
Cnih4	0	0.686785	0.439	0.056	0	3
Helz2	0	0.686679	0.346	0.034	0	3
Cdc42ep3	0	0.68661	0.393	0.049	0	3
Cct2	0	0.685961	0.427	0.054	0	3
Tnfaip1	0	0.685047	0.476	0.072	0	3
Ssr2	0	0.683858	0.399	0.04	0	3
Fkbp3	0	0.683572	0.434	0.065	0	3
Swi5	0	0.682388	0.551	0.094	0	3
Ubxn1	0	0.682334	0.587	0.1	0	3
Rraga	0	0.681621	0.366	0.037	0	3
Ndufa11	0	0.681324	0.588	0.1	0	3
Hfe	0	0.680981	0.322	0.026	0	3
Nucb1	0	0.679306	0.494	0.074	0	3
Ndufa6	0	0.678952	0.627	0.118	0	3
Sox7	0	0.677394	0.281	0.023	0	3
Pon2	0	0.677125	0.382	0.046	0	3
Pdcd10	0	0.676965	0.545	0.086	0	3
Hnrnpab	0	0.676775	0.505	0.079	0	3
Cnn3	0	0.676611	0.634	0.132	0	3
Tmem26	0	0.676588	0.351	0.04	0	3
Banf1	0	0.676234	0.361	0.043	0	3
Eogt	0	0.675635	0.484	0.081	0	3
Serpinb6a	0	0.675439	0.518	0.084	0	3
N4bp3	0	0.675193	0.317	0.03	0	3
Eloc	0	0.67417	0.482	0.068	0	3
Ptges3	0	0.673127	0.637	0.135	0	3
Naa38	0	0.67193	0.408	0.055	0	3
Nck1	0	0.671278	0.588	0.115	0	3
Pcdh12	0	0.669753	0.365	0.033	0	3
Mrps24	0	0.668175	0.501	0.078	0	3
Uqcc3	0	0.668034	0.39	0.043	0	3
Nbdy	0	0.667486	0.425	0.056	0	3
Smim10l1	0	0.667288	0.454	0.069	0	3
Lamb2	0	0.665856	0.493	0.08	0	3
Cpne8	0	0.66469	0.544	0.1	0	3
Cops9	0	0.661728	0.484	0.074	0	3
Rab11b	0	0.660562	0.511	0.081	0	3
Csrp1	0	0.660378	0.476	0.074	0	3
Emp1	0	0.659256	0.313	0.032	0	3
Fxyd5	0	0.658439	0.525	0.095	0	3
Mrpl27	0	0.65706	0.359	0.039	0	3
Srp9	0	0.655559	0.443	0.061	0	3
Tbca	0	0.655114	0.578	0.106	0	3
Bnip2	0	0.653548	0.598	0.115	0	3
Cstb	0	0.65331	0.334	0.034	0	3
Polr2g	0	0.652979	0.366	0.04	0	3
Tsen34	0	0.652799	0.392	0.045	0	3
Atp5f1	0	0.651931	0.643	0.119	0	3
Psma6	0	0.649422	0.476	0.068	0	3
Pdcl3	0	0.649358	0.395	0.05	0	3
Cltb	0	0.649245	0.474	0.078	0	3
Ndufb8	0	0.647739	0.641	0.111	0	3
Tapbpl	0	0.646684	0.293	0.018	0	3
Sugt1	0	0.646437	0.511	0.087	0	3
Sf3b6	0	0.645102	0.489	0.074	0	3
Cycs	0	0.644409	0.495	0.074	0	3
Psma1	0	0.644385	0.525	0.084	0	3
Stx2	0	0.64438	0.392	0.05	0	3
Hprt	0	0.643944	0.448	0.059	0	3
Znrd1	0	0.643751	0.389	0.046	0	3
Rtn4	0	0.64255	0.658	0.14	0	3
Snrpc	0	0.64135	0.353	0.036	0	3
Ybx3	0	0.640751	0.472	0.065	0	3
Trafd1	0	0.640306	0.341	0.034	0	3
Mrpl20	0	0.640233	0.453	0.061	0	3
Gjc1	0	0.640143	0.376	0.048	0	3
Ndufb7	0	0.639945	0.684	0.141	0	3
Plgrkt	0	0.638763	0.462	0.066	0	3
0610010K14Rik	0	0.637971	0.395	0.054	0	3
Mob4	0	0.637329	0.577	0.104	0	3
Sdf4	0	0.636805	0.541	0.092	0	3
Zfp36l2	0	0.636774	0.33	0.038	0	3
Sf3b5	0	0.635938	0.359	0.044	0	3
Acvrl1	0	0.635124	0.521	0.087	0	3
Ostc	0	0.634748	0.394	0.046	0	3
Fez2	0	0.634439	0.423	0.057	0	3
Ndufc1	0	0.63421	0.592	0.114	0	3
Csnk1e	0	0.634003	0.38	0.051	0	3
Cacybp	0	0.633948	0.38	0.049	0	3
Chmp4b	0	0.630656	0.509	0.082	0	3
Tmem160	0	0.630537	0.483	0.073	0	3
Psmc6	0	0.628242	0.469	0.074	0	3
Zbtb46	0	0.627544	0.577	0.11	0	3
Chrac1	0	0.626543	0.323	0.033	0	3
0610012G03Rik	0	0.62645	0.45	0.061	0	3
Gbp3	0	0.626223	0.261	0.023	0	3
Selenoh	0	0.625987	0.301	0.029	0	3
Ppic	0	0.625769	0.379	0.044	0	3
Adam15	0	0.624766	0.52	0.096	0	3
Sdc3	0	0.623162	0.314	0.029	0	3
Tomm5	0	0.6228	0.378	0.05	0	3
Phospho1	0	0.622589	0.25	0.017	0	3
Ahr	0	0.622105	0.35	0.043	0	3
Parvb	0	0.621793	0.381	0.054	0	3
Sipa1l2	0	0.620516	0.459	0.078	0	3
Asah1	0	0.620017	0.449	0.065	0	3
BC031181	0	0.61917	0.53	0.082	0	3
Arhgdia	0	0.618434	0.737	0.167	0	3
Polr2c	0	0.618353	0.361	0.043	0	3
Pros1	0	0.617612	0.373	0.05	0	3
Prkd2	0	0.617413	0.369	0.045	0	3
Adprh	0	0.616568	0.305	0.025	0	3
Atp6ap2	0	0.615453	0.392	0.053	0	3
Mrpl57	0	0.613967	0.313	0.032	0	3
Slc29a1	0	0.613327	0.38	0.053	0	3
Tap1	0	0.613241	0.304	0.026	0	3
Sumo1	0	0.612892	0.56	0.103	0	3
Cox7b	0	0.612836	0.596	0.112	0	3
Stard8	0	0.612712	0.583	0.114	0	3
Mmp15	0	0.611966	0.311	0.032	0	3
Tbcb	0	0.610946	0.454	0.064	0	3
Usp18	0	0.610042	0.256	0.021	0	3
Golga7	0	0.608445	0.38	0.048	0	3
Atp5mpl	0	0.607865	0.527	0.092	0	3
Jcad	0	0.607757	0.388	0.056	0	3
Nudc	0	0.606226	0.454	0.072	0	3
Apobec3	0	0.604152	0.333	0.039	0	3
Grpel1	0	0.603342	0.364	0.044	0	3
Gpx8	0	0.602117	0.276	0.02	0	3
Vasp	0	0.601986	0.379	0.044	0	3
Polr2i	0	0.600593	0.374	0.051	0	3
Srpr	0	0.600191	0.446	0.072	0	3
Tm9sf2	0	0.599417	0.54	0.102	0	3
Bex3	0	0.598499	0.262	0.017	0	3
Cct7	0	0.598211	0.482	0.076	0	3
Ube2i	0	0.59805	0.592	0.105	0	3
Psmd8	0	0.594984	0.462	0.067	0	3
Cebpg	0	0.594784	0.404	0.059	0	3
Nt5c	0	0.594751	0.312	0.031	0	3
Znfx1	0	0.594506	0.441	0.068	0	3
Cyp2d22	0	0.591821	0.331	0.039	0	3
1110038F14Rik	0	0.590184	0.391	0.054	0	3
Mapk12	0	0.589707	0.399	0.053	0	3
Gemin7	0	0.589373	0.418	0.057	0	3
Slc44a2	0	0.588579	0.473	0.081	0	3
Mydgf	0	0.58757	0.367	0.046	0	3
Rbm42	0	0.586429	0.424	0.06	0	3
Cdk4	0	0.585622	0.35	0.04	0	3
Lman1	0	0.584928	0.503	0.089	0	3
Alyref	0	0.584649	0.344	0.04	0	3
9530082P21Rik	0	0.584224	0.264	0.02	0	3
Mesd	0	0.583032	0.399	0.057	0	3
Ramac	0	0.583018	0.314	0.035	0	3
Paip2	0	0.582712	0.615	0.128	0	3
Hcfc1r1	0	0.58081	0.403	0.06	0	3
Pdcl	0	0.580317	0.268	0.024	0	3
Carhsp1	0	0.57817	0.306	0.031	0	3
Atp8a2	0	0.57801	0.271	0.02	0	3
Gna11	0	0.575398	0.61	0.126	0	3
Cfl2	0	0.575387	0.385	0.053	0	3
Sult1a1	0	0.574671	0.27	0.024	0	3
Card19	0	0.571937	0.349	0.046	0	3
Zfpm1	0	0.571799	0.295	0.028	0	3
Txnl1	0	0.571312	0.454	0.071	0	3
Tmed7	0	0.569726	0.374	0.052	0	3
Wdr83os	0	0.565695	0.337	0.041	0	3
Ddost	0	0.564115	0.38	0.05	0	3
Irf9	0	0.564022	0.344	0.043	0	3
Leprotl1	0	0.562738	0.322	0.038	0	3
Ccdc12	0	0.562649	0.598	0.119	0	3
Lix1l	0	0.56022	0.291	0.028	0	3
Pfdn2	0	0.559574	0.424	0.059	0	3
H2-Ab1	0	0.558867	0.471	0.081	0	3
Triobp	0	0.558667	0.331	0.037	0	3
Rnf215	0	0.558377	0.307	0.032	0	3
Lamtor1	0	0.558115	0.436	0.066	0	3
Eif4a1	0	0.554904	0.617	0.124	0	3
Ifngr2	0	0.554864	0.299	0.03	0	3
Cdc42ep4	0	0.554495	0.272	0.024	0	3
Ctbp1	0	0.554397	0.45	0.07	0	3
Bub3	0	0.55389	0.395	0.054	0	3
Rcn2	0	0.553383	0.331	0.04	0	3
Tmem208	0	0.546565	0.425	0.063	0	3
Strap	0	0.546277	0.326	0.036	0	3
Med10	0	0.546072	0.282	0.029	0	3
Taf10	0	0.545441	0.453	0.076	0	3
St6galnac4	0	0.543718	0.265	0.019	0	3
Tex261	0	0.54347	0.38	0.048	0	3
Ndufb6	0	0.542748	0.373	0.05	0	3
Ubqln2	0	0.542033	0.259	0.023	0	3
Pdcd6	0	0.541382	0.406	0.057	0	3
Tmem128	0	0.541032	0.358	0.043	0	3
Vbp1	0	0.539441	0.337	0.035	0	3
Ndufab1	0	0.535635	0.46	0.077	0	3
Trappc6b	0	0.535436	0.448	0.07	0	3
Yipf3	0	0.53518	0.3	0.031	0	3
Polr1d	0	0.534125	0.555	0.105	0	3
Ap2m1	0	0.530973	0.417	0.064	0	3
Arpc4	0	0.52513	0.593	0.117	0	3
Pik3r6	0	0.522665	0.253	0.022	0	3
Mrpl36	0	0.522485	0.284	0.027	0	3
Ech1	0	0.522118	0.518	0.094	0	3
Mxra8	0	0.521866	0.264	0.023	0	3
Ndufb10	0	0.517511	0.556	0.108	0	3
Ubald2	0	0.516149	0.379	0.054	0	3
Chmp2b	0	0.515353	0.365	0.05	0	3
Eif3g	0	0.513984	0.397	0.055	0	3
Ufc1	0	0.509327	0.397	0.056	0	3
Psmc5	0	0.507396	0.475	0.079	0	3
Cct5	0	0.502849	0.422	0.065	0	3
Kdelr1	0	0.502132	0.394	0.057	0	3
Adh5	0	0.500858	0.331	0.036	0	3
Emg1	0	0.495308	0.365	0.047	0	3
Eif6	0	0.493562	0.441	0.064	0	3
Cyth2	0	0.491273	0.273	0.026	0	3
Psmc4	0	0.432584	0.395	0.058	0	3
Mlf2	5.35871e-308	0.507575	0.432	0.07	8.01127e-304	3
Dctn6	9.43183e-308	0.500347	0.347	0.045	1.41006e-303	3
Csnk2b	1.9333e-307	0.508722	0.396	0.059	2.89028e-303	3
Gtf2a2	9.06975e-307	0.510161	0.413	0.064	1.35593e-302	3
Nin	1.51815e-306	0.609451	0.368	0.052	2.26963e-302	3
Yif1b	1.69191e-306	0.557159	0.345	0.045	2.52941e-302	3
Ebp	2.52166e-306	0.51466	0.278	0.028	3.76989e-302	3
Timm8b	3.98115e-306	0.536301	0.322	0.039	5.95182e-302	3
Tm9sf3	6.87141e-306	0.625351	0.639	0.141	1.02728e-301	3
Atp6v0c	1.95519e-305	0.562674	0.788	0.196	2.92301e-301	3
Psmc2	3.52734e-305	0.536306	0.414	0.064	5.27337e-301	3
Fam171a1	9.5164e-305	0.692593	0.644	0.144	1.4227e-300	3
Mcam	1.10381e-304	0.677998	0.331	0.042	1.6502e-300	3
Psma4	1.62236e-304	0.506412	0.513	0.095	2.42543e-300	3
Uchl1	1.75338e-304	0.851848	0.264	0.026	2.6213e-300	3
2410006H16Rik	2.93438e-304	0.627196	0.407	0.063	4.38689e-300	3
Rpl38	4.34573e-304	0.952147	0.986	0.334	6.49686e-300	3
Phf5a	5.16434e-304	0.497724	0.325	0.04	7.72068e-300	3
Sh3bgrl	1.63918e-303	0.60944	0.509	0.096	2.45058e-299	3
Gm16286	1.7455e-303	0.476075	0.353	0.047	2.60952e-299	3
Enpep	4.11977e-303	0.507619	0.435	0.07	6.15906e-299	3
Palmd	6.43767e-303	0.638826	0.413	0.065	9.62431e-299	3
Anp32b	9.8864e-303	0.549283	0.459	0.079	1.47802e-298	3
Dnajc8	1.82218e-302	0.596128	0.501	0.093	2.72416e-298	3
Ndufa3	6.88211e-302	0.507943	0.59	0.122	1.02888e-297	3
Ndufs8	1.48989e-301	0.495103	0.446	0.074	2.22738e-297	3
Rbms2	2.13656e-301	0.845511	0.747	0.19	3.19416e-297	3
Magoh	5.9e-301	0.579217	0.339	0.045	8.8205e-297	3
Mapre1	7.94142e-301	0.581407	0.479	0.086	1.18724e-296	3
Plod1	1.2267e-300	0.500186	0.349	0.047	1.83392e-296	3
Itga5	3.79279e-300	0.53009	0.325	0.041	5.67022e-296	3
Smim12	3.38384e-299	0.472936	0.272	0.028	5.05883e-295	3
Parp12	3.59422e-299	0.531763	0.348	0.047	5.37336e-295	3
Rab5if	3.62606e-299	0.494603	0.347	0.047	5.42095e-295	3
C1d	5.19687e-299	0.491151	0.336	0.044	7.76933e-295	3
Fam174a	5.95673e-299	0.539444	0.316	0.039	8.90531e-295	3
Inpp5d	1.16514e-298	0.582065	0.434	0.072	1.74189e-294	3
Ndfip1	2.97844e-298	0.578606	0.708	0.169	4.45277e-294	3
9930111J21Rik2	3.85272e-298	0.619877	0.407	0.064	5.75982e-294	3
Rnaseh2c	3.9905e-298	0.620488	0.349	0.048	5.96579e-294	3
Sema4c	6.85907e-298	0.555654	0.262	0.026	1.02543e-293	3
Ddx58	1.0155e-297	0.571148	0.351	0.048	1.51818e-293	3
Nenf	1.33739e-297	0.565414	0.456	0.079	1.9994e-293	3
Dusp6	2.26802e-297	0.623307	0.294	0.034	3.39069e-293	3
1110004F10Rik	2.9778e-297	0.54884	0.424	0.069	4.4518e-293	3
Stk10	3.23278e-297	0.541838	0.322	0.04	4.83301e-293	3
Tusc3	7.56724e-297	0.591012	0.423	0.07	1.1313e-292	3
Cope	1.04424e-296	0.497194	0.471	0.084	1.56114e-292	3
Sdhd	2.37518e-296	0.470064	0.309	0.037	3.55089e-292	3
Dync1i2	5.25294e-296	0.687646	0.689	0.164	7.85315e-292	3
Acap2	6.94324e-296	0.56447	0.582	0.122	1.03801e-291	3
Pitpnm2	7.14224e-296	0.528832	0.444	0.075	1.06777e-291	3
Hnrnpa3	8.15243e-296	0.640218	0.737	0.183	1.21879e-291	3
2610001J05Rik	1.24092e-295	0.494886	0.264	0.027	1.85517e-291	3
Mpzl1	1.71391e-295	0.609415	0.507	0.097	2.5623e-291	3
Rab12	3.39243e-295	0.54508	0.437	0.074	5.07168e-291	3
Map4k4	3.82902e-295	0.621778	0.622	0.138	5.72439e-291	3
Purb	7.35867e-295	0.596465	0.582	0.123	1.10012e-290	3
Csf1	1.01941e-294	0.661418	0.288	0.032	1.52401e-290	3
Fam53b	1.61944e-294	0.486788	0.33	0.042	2.42106e-290	3
Cd164	1.69616e-294	0.556571	0.415	0.067	2.53575e-290	3
Cript	1.90605e-294	0.497337	0.38	0.056	2.84955e-290	3
Prex2	3.53629e-294	0.733991	0.811	0.217	5.28675e-290	3
Plat	3.59002e-294	0.357934	0.441	0.075	5.36708e-290	3
Adipor1	8.75913e-294	0.480452	0.443	0.075	1.30949e-289	3
S100a1	9.25378e-294	0.649919	0.595	0.13	1.38344e-289	3
Pgam1	1.87897e-293	0.460278	0.395	0.061	2.80906e-289	3
Fam3c	3.99862e-293	0.543717	0.408	0.065	5.97793e-289	3
Mdfic	4.40017e-293	0.552166	0.507	0.097	6.57826e-289	3
Cuta	7.80941e-293	0.530612	0.498	0.094	1.16751e-288	3
Atp5c1	9.92853e-293	0.463259	0.668	0.153	1.48431e-288	3
1700030F04Rik	3.20671e-292	0.512066	0.258	0.026	4.79403e-288	3
Notch4	3.90584e-292	0.559633	0.348	0.048	5.83924e-288	3
Mrpl53	4.46709e-292	0.524809	0.322	0.041	6.67829e-288	3
Emc3	8.81553e-292	0.490413	0.406	0.065	1.31792e-287	3
Rilpl1	8.83345e-292	0.486458	0.316	0.039	1.3206e-287	3
Rgs3	2.05625e-291	0.625438	0.467	0.085	3.0741e-287	3
Rcsd1	3.39673e-291	0.580992	0.457	0.081	5.07812e-287	3
Snrpd1	3.89534e-291	0.496949	0.38	0.057	5.82354e-287	3
Nucks1	3.90456e-291	0.561546	0.589	0.126	5.83731e-287	3
Acaa2	5.45845e-291	0.483017	0.385	0.058	8.16038e-287	3
Eif3c	1.77368e-290	0.563124	0.579	0.123	2.65165e-286	3
Hecw2	1.82727e-290	0.564356	0.562	0.116	2.73178e-286	3
Klf10	2.15617e-290	0.554663	0.278	0.03	3.22347e-286	3
Xdh	3.01765e-290	0.564426	0.337	0.045	4.51138e-286	3
Gas5	4.0509e-290	0.59102	0.641	0.146	6.05609e-286	3
Akt1	9.82749e-290	0.526733	0.344	0.047	1.46921e-285	3
Pls3	1.31932e-289	0.584936	0.554	0.114	1.97238e-285	3
Ebf1	1.82872e-289	1.1504	0.941	0.348	2.73394e-285	3
Mrps21	2.16846e-289	0.485358	0.528	0.104	3.24184e-285	3
Ntan1	2.25068e-289	0.493098	0.353	0.05	3.36477e-285	3
Gm12216	4.94828e-289	0.5354	0.374	0.056	7.39767e-285	3
Zfp503	8.78698e-289	0.648814	0.393	0.062	1.31365e-284	3
Ptbp3	9.48739e-289	0.610397	0.72	0.178	1.41836e-284	3
Eef2	1.15688e-288	0.648242	0.848	0.232	1.72954e-284	3
Rpn1	1.23861e-288	0.524826	0.438	0.076	1.85172e-284	3
Pebp1	1.96492e-288	0.471479	0.54	0.108	2.93756e-284	3
Rexo2	3.40739e-288	0.529098	0.441	0.076	5.09405e-284	3
Cyba	4.33818e-288	0.485835	0.699	0.166	6.48559e-284	3
Emc10	1.17117e-287	0.408314	0.489	0.091	1.7509e-283	3
Arpc1a	1.20075e-287	0.457538	0.474	0.086	1.79513e-283	3
Eif4a3	2.5425e-287	0.523035	0.373	0.056	3.80104e-283	3
Cnpy2	3.97094e-287	0.503955	0.401	0.064	5.93656e-283	3
Bcam	4.5999e-287	0.543454	0.622	0.139	6.87684e-283	3
Commd3	5.86413e-287	0.508107	0.365	0.054	8.76687e-283	3
Tbc1d2b	8.34984e-287	0.521628	0.292	0.034	1.2483e-282	3
Herc6	8.76716e-287	0.644524	0.415	0.069	1.31069e-282	3
Slc25a3	9.86779e-287	0.487284	0.717	0.175	1.47524e-282	3
Rab5c	1.18801e-286	0.474491	0.52	0.103	1.77607e-282	3
Bcas2	1.189e-286	0.475752	0.354	0.051	1.77756e-282	3
Mob1a	1.34822e-286	0.548337	0.362	0.053	2.01558e-282	3
Spred1	6.92899e-286	0.533741	0.462	0.083	1.03588e-281	3
Morf4l2	7.52667e-286	0.472571	0.344	0.048	1.12524e-281	3
Mdh2	2.14351e-285	0.495655	0.52	0.103	3.20455e-281	3
Mcl1	3.11928e-285	0.541483	0.602	0.133	4.66333e-281	3
Swap70	4.16886e-285	0.564035	0.445	0.079	6.23244e-281	3
Atp5b	6.57617e-285	0.646419	0.856	0.24	9.83137e-281	3
Ahnak	1.21442e-284	0.654383	0.745	0.189	1.81555e-280	3
Serpinb9	2.11162e-284	0.533718	0.264	0.028	3.15687e-280	3
Smad1	2.51412e-284	0.612667	0.434	0.076	3.75861e-280	3
Mef2a	3.87172e-284	0.749776	0.809	0.223	5.78822e-280	3
Atpif1	1.54472e-283	0.535902	0.627	0.143	2.30936e-279	3
Ssu72	2.26046e-283	0.484405	0.463	0.084	3.37939e-279	3
Fam89b	2.67697e-283	0.475027	0.25	0.025	4.00207e-279	3
Scarb2	3.82248e-283	0.567798	0.412	0.069	5.7146e-279	3
Rbis	6.31715e-283	0.537685	0.359	0.053	9.44414e-279	3
Tmbim4	1.22247e-282	0.472276	0.516	0.102	1.82759e-278	3
Aip	1.71561e-282	0.515434	0.299	0.037	2.56484e-278	3
Sp110	2.72852e-282	0.540691	0.301	0.037	4.07914e-278	3
Ndufa2	2.7966e-282	0.474428	0.702	0.17	4.18092e-278	3
Mrpl43	3.22157e-282	0.470221	0.326	0.043	4.81625e-278	3
Tmem223	5.62021e-282	0.523808	0.37	0.056	8.40222e-278	3
Klk8	1.14293e-281	0.555204	0.264	0.028	1.70868e-277	3
Higd1a	2.20899e-281	0.536465	0.376	0.058	3.30244e-277	3
Sys1	4.08773e-281	0.467048	0.37	0.056	6.11116e-277	3
Rassf1	4.62225e-281	0.50687	0.423	0.072	6.91027e-277	3
Eif3e	5.73014e-281	0.52307	0.463	0.086	8.56656e-277	3
Usf1	5.76876e-281	0.46495	0.267	0.029	8.6243e-277	3
Cpne2	6.06213e-281	0.534306	0.275	0.031	9.06288e-277	3
Cdk17	7.32787e-281	0.560307	0.535	0.11	1.09552e-276	3
Gpr146	7.92495e-281	0.52222	0.333	0.046	1.18478e-276	3
Pdap1	9.00168e-281	0.607476	0.446	0.08	1.34575e-276	3
Hexa	1.75006e-280	0.502844	0.379	0.059	2.61634e-276	3
Mgat2	2.42835e-280	0.481882	0.301	0.037	3.63038e-276	3
Alkbh5	3.67658e-280	0.50573	0.411	0.069	5.49649e-276	3
St6galnac3	7.60647e-280	0.771959	0.766	0.207	1.13717e-275	3
Hnrnpa1	9.54501e-280	0.458314	0.465	0.086	1.42698e-275	3
Ppp1r13b	9.72906e-280	0.51155	0.524	0.106	1.45449e-275	3
Mgst3	1.24297e-279	0.460461	0.303	0.038	1.85824e-275	3
Sap30l	2.41043e-279	0.484797	0.32	0.042	3.60359e-275	3
Tpd52l2	3.10063e-279	0.521534	0.344	0.049	4.63544e-275	3
Ttc28	4.62055e-279	0.666256	0.692	0.174	6.90773e-275	3
Ddrgk1	1.5695e-278	0.457828	0.478	0.09	2.34641e-274	3
Fis1	1.88411e-278	0.48157	0.609	0.136	2.81674e-274	3
Srsf7	4.0817e-278	0.499647	0.563	0.121	6.10215e-274	3
Npr1	6.65266e-278	0.467967	0.475	0.089	9.94573e-274	3
Ephx1	1.69135e-277	0.549357	0.362	0.055	2.52856e-273	3
Ghitm	1.93564e-277	0.481801	0.417	0.071	2.89378e-273	3
Ap2s1	2.69149e-277	0.412785	0.419	0.071	4.02378e-273	3
B3gnt2	5.80895e-277	0.62083	0.619	0.143	8.68438e-273	3
Dab2ip	6.91431e-277	0.495191	0.533	0.11	1.03369e-272	3
Pak2	1.10998e-276	0.597894	0.692	0.172	1.65943e-272	3
2610203C22Rik	1.22024e-276	0.557064	0.263	0.028	1.82426e-272	3
Cox4i1	1.44634e-276	0.787549	0.946	0.3	2.16228e-272	3
Tmem179b	2.38543e-276	0.457678	0.276	0.031	3.56622e-272	3
Selenot	3.5644e-276	0.501098	0.425	0.074	5.32877e-272	3
Eef1d	3.95941e-276	0.467177	0.617	0.139	5.91933e-272	3
Pitpna	4.24336e-276	0.562265	0.618	0.142	6.34382e-272	3
Map1b	4.39688e-276	0.58008	0.295	0.036	6.57333e-272	3
Slirp	6.11888e-276	0.529407	0.315	0.042	9.14773e-272	3
Fermt2	6.35682e-276	0.619347	0.815	0.223	9.50344e-272	3
Ccdc59	6.97104e-276	0.522605	0.375	0.059	1.04217e-271	3
Myadm	9.68437e-276	0.527571	0.293	0.036	1.44781e-271	3
Tgoln1	9.7197e-276	0.49778	0.519	0.105	1.4531e-271	3
Eny2	1.21015e-275	0.534934	0.417	0.072	1.80917e-271	3
Cbx3	3.21381e-275	0.566975	0.395	0.065	4.80464e-271	3
Pigp	1.11311e-274	0.539165	0.286	0.035	1.6641e-270	3
Bud31	1.53181e-274	0.446897	0.284	0.034	2.29006e-270	3
Atp1b3	1.84566e-274	0.591721	0.522	0.108	2.75926e-270	3
Cnn2	3.05888e-274	0.496298	0.383	0.061	4.57303e-270	3
Tll1	4.0042e-274	0.866987	0.298	0.038	5.98628e-270	3
Btg2	1.10319e-273	0.630056	0.337	0.049	1.64927e-269	3
Stx12	1.20389e-273	0.417595	0.46	0.085	1.79981e-269	3
Nr1h2	2.80932e-273	0.470863	0.305	0.039	4.19993e-269	3
Cct6a	4.63111e-273	0.482927	0.422	0.074	6.92352e-269	3
Peg13	7.05697e-273	0.508931	0.281	0.033	1.05502e-268	3
Sec14l1	2.731e-272	0.534229	0.48	0.093	4.08284e-268	3
Nfic	1.04834e-271	0.558721	0.562	0.123	1.56726e-267	3
Mxra7	1.06262e-271	0.517039	0.359	0.055	1.58862e-267	3
Iscu	1.51174e-271	0.474596	0.409	0.07	2.26005e-267	3
Wasf2	1.58643e-271	0.664382	0.835	0.238	2.37171e-267	3
Erap1	2.90205e-271	0.483811	0.308	0.041	4.33857e-267	3
Lamtor3	4.83347e-271	0.459255	0.307	0.04	7.22604e-267	3
G3bp2	5.40549e-271	0.456371	0.461	0.087	8.0812e-267	3
Saysd1	6.08803e-271	0.49796	0.305	0.04	9.1016e-267	3
Zfp706	7.74156e-271	0.453016	0.487	0.095	1.15736e-266	3
Ube2l3	1.14343e-270	0.397448	0.447	0.082	1.70943e-266	3
Rab2a	2.92542e-270	0.59385	0.801	0.219	4.37351e-266	3
Ilk	3.93741e-270	0.443886	0.377	0.06	5.88643e-266	3
Twf2	7.5403e-270	0.478343	0.259	0.028	1.12727e-265	3
Junb	1.17231e-269	0.685648	0.282	0.035	1.7526e-265	3
Ndufb5	2.87624e-269	0.447353	0.518	0.106	4.29997e-265	3
Ppm1e	3.03039e-269	0.604944	0.373	0.06	4.53043e-265	3
Fat4	3.05127e-269	0.535431	0.293	0.037	4.56164e-265	3
Atp5g3	3.73583e-269	0.43499	0.541	0.115	5.58506e-265	3
Slc39a1	6.66735e-269	0.499693	0.25	0.027	9.96769e-265	3
Slc38a2	8.38379e-269	0.582488	0.58	0.13	1.25338e-264	3
Emc4	1.20554e-268	0.456842	0.27	0.031	1.80228e-264	3
Ppp2r1a	1.58884e-268	0.477917	0.367	0.058	2.37531e-264	3
Mtmr2	1.59763e-268	0.479931	0.395	0.066	2.38845e-264	3
Cap1	1.90637e-268	0.491236	0.366	0.057	2.85002e-264	3
Polr2l	6.7143e-268	0.499414	0.355	0.055	1.00379e-263	3
Smim15	1.64386e-267	0.492162	0.266	0.03	2.45758e-263	3
Nos3	3.58529e-267	0.51951	0.286	0.036	5.36e-263	3
Fam104a	5.60555e-267	0.458058	0.372	0.059	8.3803e-263	3
Mrpl34	6.1083e-267	0.472817	0.263	0.03	9.13191e-263	3
Pim1	9.64769e-267	0.485134	0.266	0.03	1.44233e-262	3
Ctsb	1.54645e-266	0.397034	0.599	0.136	2.31194e-262	3
Mbd2	1.56752e-266	0.411851	0.588	0.132	2.34345e-262	3
Nras	5.02451e-266	0.467587	0.388	0.065	7.51164e-262	3
Pkm	6.40787e-266	0.45541	0.559	0.122	9.57976e-262	3
Ypel3	7.07043e-266	0.430218	0.472	0.091	1.05703e-261	3
Rab1b	1.76213e-265	0.47243	0.33	0.048	2.63438e-261	3
2023-09-04	3.00741e-265	0.505886	0.321	0.045	4.49608e-261	3
Pin1	4.93303e-265	0.446121	0.306	0.041	7.37489e-261	3
Coro1b	5.16106e-265	0.408712	0.304	0.04	7.71579e-261	3
Metap2	5.67626e-265	0.437612	0.548	0.119	8.48601e-261	3
Mcf2l	7.06087e-265	0.496336	0.445	0.083	1.0556e-260	3
Ctso	1.13788e-264	0.498153	0.279	0.034	1.70113e-260	3
Rap2a	1.24436e-264	0.473019	0.266	0.031	1.86032e-260	3
Prelid1	1.63887e-264	0.43443	0.456	0.086	2.45012e-260	3
Afap1l1	2.16618e-264	0.473398	0.479	0.095	3.23845e-260	3
Nsmce4a	2.25492e-264	0.459279	0.304	0.04	3.37111e-260	3
Col4a2	2.38704e-264	0.763488	0.811	0.237	3.56863e-260	3
Cops8	4.83467e-264	0.433615	0.278	0.034	7.22784e-260	3
Unc5b	9.62374e-264	0.576591	0.297	0.039	1.43875e-259	3
Mtpn	1.57539e-263	0.481073	0.413	0.073	2.35521e-259	3
Epn2	1.91664e-263	0.469771	0.54	0.116	2.86538e-259	3
Rex1bd	3.6278e-263	0.470828	0.434	0.08	5.42356e-259	3
Mtdh	4.15247e-263	0.723554	0.81	0.235	6.20795e-259	3
4930523C07Rik	4.29058e-263	0.581945	0.411	0.073	6.41442e-259	3
Hpcal1	8.59188e-263	0.422343	0.604	0.139	1.28449e-258	3
Cox14	1.14062e-262	0.528193	0.35	0.054	1.70523e-258	3
Mrpl23	1.79098e-262	0.511996	0.34	0.051	2.67752e-258	3
Sec13	2.01266e-262	0.447692	0.263	0.03	3.00893e-258	3
Psmc3	2.5021e-262	0.441328	0.508	0.105	3.74064e-258	3
Rnf213	3.02284e-262	0.566242	0.537	0.117	4.51914e-258	3
Txndc15	4.647e-262	0.444631	0.343	0.052	6.94727e-258	3
Gnb4	5.57503e-262	0.504908	0.253	0.028	8.33467e-258	3
Mrpl14	6.65284e-262	0.444099	0.336	0.05	9.946e-258	3
Plin2	9.11477e-262	0.457294	0.313	0.043	1.36266e-257	3
Dynlt3	1.05748e-261	0.531561	0.337	0.051	1.58093e-257	3
Tspan9	3.50439e-261	0.60012	0.812	0.228	5.23907e-257	3
Cops6	3.83437e-261	0.483023	0.308	0.042	5.73238e-257	3
Arf6	3.99038e-261	0.510875	0.351	0.055	5.96562e-257	3
Bcl7b	4.02022e-261	0.496343	0.309	0.043	6.01023e-257	3
Bmpr2	6.35536e-261	0.703616	0.773	0.216	9.50126e-257	3
Asap1	6.94207e-261	0.711164	0.873	0.267	1.03784e-256	3
Mif	7.0518e-261	0.523449	0.439	0.083	1.05424e-256	3
Prex1	9.97587e-261	0.502915	0.336	0.05	1.49139e-256	3
Impdh1	2.02121e-260	0.489356	0.26	0.03	3.02172e-256	3
[truncated: 6,932 more rows]

## Sheet: Cluster Genes - Merged HTN
Table S2	Cluster marker genes by adjusted p-value for each cluster in hypertensive samples
gene	p_val	avg_log2FC	pct.1	pct.2	p_val_adj	cluster
Gpx3	4.82535e-281	1.51491	0.978	0.754	6.53256e-277	0
Kap	6.35092e-205	1.47622	0.862	0.493	8.59787e-201	0
Magi2	2.9661e-194	1.60659	0.809	0.451	4.0155e-190	0
Cmss1	2.7139e-181	0.789138	0.999	0.991	3.67407e-177	0
Neat1	1.15772e-178	1.33979	0.87	0.663	1.56732e-174	0
Slc8a1	1.0016e-135	1.79772	0.663	0.36	1.35597e-131	0
Slc12a1	5.64355e-111	1.68277	0.569	0.301	7.64024e-107	0
Slc34a1	1.06352e-106	0.918786	0.788	0.484	1.43979e-102	0
Fxyd2	3.53793e-101	1.45351	0.575	0.331	4.78965e-97	0
Gphn	2.1945e-93	0.687838	0.913	0.924	2.97092e-89	0
Slc12a3	3.5681e-92	1.69491	0.522	0.284	4.83049e-88	0
Esrrg	8.38151e-87	0.923945	0.735	0.451	1.13469e-82	0
Pkhd1	4.28136e-81	1.1466	0.612	0.362	5.7961e-77	0
Ank3	6.25817e-80	1.13799	0.625	0.384	8.47231e-76	0
Erbb4	1.04628e-69	1.6097	0.427	0.233	1.41646e-65	0
Ggt1	5.318e-64	1.04231	0.561	0.364	7.1995e-60	0
Abcc2	4.86697e-62	0.831811	0.66	0.429	6.58891e-58	0
Zbtb20	2.30597e-59	0.528942	0.874	0.911	3.12182e-55	0
Acsm2	9.2643e-57	0.934319	0.571	0.367	1.2542e-52	0
Pth1r	2.01473e-56	1.01416	0.544	0.364	2.72754e-52	0
Ghr	5.25811e-54	0.679861	0.711	0.553	7.11843e-50	0
Pde4d	8.1379e-54	0.639073	0.767	0.681	1.10171e-49	0
Hnf1aos1	1.50393e-46	1.12419	0.428	0.264	2.03602e-42	0
Gm42397	7.19237e-44	0.728247	0.582	0.401	9.73704e-40	0
Ptprj	3.72617e-43	1.21627	0.428	0.284	5.04449e-39	0
Chd9	1.25614e-41	0.998353	0.617	0.598	1.70056e-37	0
Glis3	4.07794e-41	0.924506	0.478	0.322	5.52072e-37	0
Fut9	4.20622e-41	0.711414	0.573	0.393	5.69438e-37	0
Gm47283	6.84668e-41	1.03522	0.536	0.442	9.26903e-37	0
Ptprd	2.55682e-40	0.918833	0.48	0.329	3.46142e-36	0
Camk1d	3.55803e-39	0.645378	0.744	0.819	4.81686e-35	0
Col4a3	1.93729e-38	0.896158	0.572	0.464	2.6227e-34	0
Lrp2	1.52217e-34	0.880398	0.468	0.33	2.06071e-30	0
Col4a4	2.59746e-32	1.11498	0.419	0.312	3.51644e-28	0
Fhit	1.11892e-31	0.899215	0.43	0.302	1.5148e-27	0
Slc4a4	3.82197e-30	0.758111	0.478	0.342	5.17418e-26	0
Egf	4.86543e-30	1.39073	0.287	0.174	6.58682e-26	0
Trabd2b	1.9151e-28	0.546513	0.503	0.354	2.59267e-24	0
Tfcp2l1	7.72073e-28	1.36217	0.258	0.153	1.04523e-23	0
Dach1	8.69745e-28	1.15261	0.335	0.231	1.17746e-23	0
Bicc1	2.39106e-27	0.978398	0.377	0.266	3.23701e-23	0
Ranbp3l	4.56769e-27	1.17255	0.32	0.209	6.18374e-23	0
Slc27a2	1.27623e-26	0.678479	0.453	0.325	1.72776e-22	0
Slc25a21	1.58164e-26	0.698219	0.476	0.353	2.14122e-22	0
Ppara	3.16834e-26	0.803252	0.411	0.293	4.2893e-22	0
Rab11fip3	8.36844e-26	0.685067	0.484	0.371	1.13292e-21	0
Klk1	2.07052e-25	1.38023	0.264	0.162	2.80307e-21	0
Dab2	2.19421e-25	0.630031	0.588	0.543	2.97052e-21	0
Prkn	1.64931e-24	0.88672	0.424	0.331	2.23284e-20	0
Rbm47	2.29813e-24	0.931031	0.343	0.237	3.11121e-20	0
Lars2	3.0966e-24	0.755601	0.645	0.753	4.19218e-20	0
Atp1b1	1.19356e-23	1.18233	0.311	0.217	1.61584e-19	0
Shroom3	4.94249e-22	1.10825	0.298	0.204	6.69115e-18	0
Atp6v0b	4.01624e-21	0.316706	0.207	0.442	5.43718e-17	0
Mecom	2.27008e-20	0.925073	0.494	0.469	3.07324e-16	0
P3h2	2.28502e-20	1.01005	0.293	0.203	3.09346e-16	0
Zmiz1	3.87167e-20	0.290466	0.209	0.437	5.24147e-16	0
Rbms3	4.6739e-20	1.31714	0.257	0.174	6.32752e-16	0
Zfp148	4.84181e-20	0.273656	0.134	0.305	6.55485e-16	0
Trps1	5.65894e-20	0.744271	0.398	0.313	7.66107e-16	0
Arid1a	7.22316e-20	0.256552	0.117	0.274	9.77872e-16	0
Fryl	1.07565e-19	0.269948	0.155	0.34	1.45622e-15	0
Glg1	1.0843e-19	0.25461	0.182	0.385	1.46792e-15	0
Dnajc1	1.23065e-19	0.263018	0.175	0.372	1.66606e-15	0
Pcm1	1.23528e-19	0.257957	0.129	0.293	1.67233e-15	0
Zfr	1.42128e-19	0.259162	0.159	0.345	1.92413e-15	0
Pcyt2	3.62134e-19	1.10524	0.305	0.227	4.90258e-15	0
Dgkh	4.62447e-19	0.258578	0.187	0.392	6.26061e-15	0
Sppl3	4.91048e-19	0.27973	0.111	0.261	6.64781e-15	0
Rapgef3	6.84881e-19	0.286595	0.122	0.279	9.27192e-15	0
Arhgap24	7.78827e-19	0.894784	0.325	0.238	1.05438e-14	0
Cdc42bpa	1.96251e-18	0.296285	0.168	0.355	2.65685e-14	0
Strn3	3.01929e-18	0.28211	0.22	0.448	4.08751e-14	0
Thoc2	3.17503e-18	0.272937	0.154	0.329	4.29836e-14	0
Osbpl6	3.20012e-18	0.856086	0.321	0.236	4.33232e-14	0
Nsd3	4.19166e-18	0.28406	0.154	0.326	5.67467e-14	0
Zfp638	6.98034e-18	0.280161	0.13	0.286	9.44998e-14	0
Tra2b	7.17487e-18	0.283092	0.123	0.273	9.71334e-14	0
Slc13a3	7.38386e-18	0.80927	0.322	0.237	9.99626e-14	0
Nufip2	1.01112e-17	0.322239	0.115	0.261	1.36885e-13	0
Aff4	1.03899e-17	0.283749	0.146	0.313	1.40658e-13	0
Plxdc2	1.13934e-17	0.918652	0.332	0.255	1.54243e-13	0
Itpr1	1.4324e-17	0.774509	0.519	0.518	1.93918e-13	0
Nsd1	1.8569e-17	0.309729	0.211	0.428	2.51387e-13	0
Nedd4l	1.89432e-17	0.969849	0.377	0.318	2.56453e-13	0
4932438A13Rik	1.97295e-17	0.288854	0.131	0.285	2.67098e-13	0
Srsf5	2.51194e-17	0.346819	0.154	0.326	3.40066e-13	0
Rb1cc1	3.30803e-17	0.25465	0.145	0.308	4.47841e-13	0
Rbm5	3.6962e-17	0.298842	0.148	0.313	5.00391e-13	0
Exoc6b	5.94311e-17	0.293865	0.179	0.365	8.04579e-13	0
Rbbp6	7.17076e-17	0.299931	0.157	0.325	9.70778e-13	0
Fhod3	7.25832e-17	0.94333	0.281	0.2	9.82632e-13	0
Flnb	8.82338e-17	0.306442	0.142	0.301	1.19451e-12	0
Setbp1	1.40624e-16	0.905331	0.277	0.198	1.90376e-12	0
Slc6a18	1.55771e-16	0.865608	0.294	0.215	2.10883e-12	0
BC005537	1.59311e-16	0.278831	0.131	0.281	2.15676e-12	0
Jmjd1c	1.71899e-16	0.278244	0.224	0.441	2.32717e-12	0
Ano6	1.8243e-16	0.349803	0.173	0.353	2.46973e-12	0
Keg1	2.18424e-16	0.919576	0.274	0.195	2.95703e-12	0
Celf1	2.24708e-16	0.325277	0.147	0.306	3.0421e-12	0
Arhgap5	3.55544e-16	0.258994	0.205	0.406	4.81336e-12	0
Brd4	3.82401e-16	0.262016	0.186	0.369	5.17695e-12	0
Fbxo11	3.93993e-16	0.262255	0.137	0.289	5.33388e-12	0
Cdk12	5.11249e-16	0.273456	0.142	0.296	6.92129e-12	0
Itsn2	5.53822e-16	0.279319	0.189	0.377	7.49764e-12	0
Dst	5.55152e-16	1.04495	0.375	0.332	7.51564e-12	0
Erbin	6.19792e-16	0.288891	0.168	0.339	8.39074e-12	0
H2afj	7.33824e-16	0.27849	0.126	0.269	9.93451e-12	0
Hnrnph1	7.44331e-16	0.322796	0.168	0.341	1.00768e-11	0
Sorbs1	8.31968e-16	0.259714	0.254	0.49	1.12632e-11	0
Igf1r	8.55065e-16	0.6727	0.553	0.565	1.15759e-11	0
Tmcc1	1.0913e-15	0.254931	0.159	0.321	1.47741e-11	0
Plcl1	1.52982e-15	0.880524	0.33	0.263	2.07107e-11	0
Setd5	1.5791e-15	0.283189	0.16	0.324	2.13778e-11	0
Wwc1	1.59319e-15	0.870922	0.282	0.206	2.15686e-11	0
Ppig	1.60588e-15	0.344375	0.156	0.317	2.17404e-11	0
Tns1	3.04748e-15	0.670399	0.584	0.656	4.12568e-11	0
Zfand6	3.50188e-15	0.345024	0.139	0.289	4.74084e-11	0
Slc17a3	3.70228e-15	0.857929	0.268	0.192	5.01215e-11	0
Chd4	4.07038e-15	0.282174	0.167	0.334	5.51047e-11	0
Kif1b	4.80195e-15	0.341682	0.154	0.313	6.50088e-11	0
Xrn1	6.87033e-15	0.326339	0.118	0.251	9.30105e-11	0
Usp9x	8.13318e-15	0.2998	0.127	0.265	1.10107e-10	0
Mtmr3	8.53168e-15	0.253988	0.12	0.253	1.15502e-10	0
Nisch	1.10414e-14	0.349506	0.204	0.395	1.49479e-10	0
Map4k3	1.46376e-14	0.293111	0.182	0.354	1.98164e-10	0
Cdk13	1.80479e-14	0.330823	0.119	0.25	2.44332e-10	0
Arih1	2.16765e-14	0.373221	0.187	0.368	2.93456e-10	0
Inpp5a	2.90172e-14	0.35925	0.143	0.289	3.92835e-10	0
Babam2	3.109e-14	0.311187	0.14	0.283	4.20896e-10	0
Ttc14	3.46419e-14	0.310405	0.126	0.259	4.68982e-10	0
Slc47a1	4.6445e-14	0.681307	0.338	0.265	6.28772e-10	0
Mycbp2	5.81233e-14	0.344936	0.221	0.422	7.86873e-10	0
Sox6	7.33756e-14	0.843398	0.349	0.3	9.93359e-10	0
Zfand3	1.07939e-13	0.366541	0.215	0.408	1.46128e-09	0
Snx29	1.10211e-13	0.546381	0.487	0.426	1.49204e-09	0
Gls	1.10375e-13	0.344873	0.126	0.258	1.49425e-09	0
Slc22a30	1.24434e-13	0.942113	0.254	0.187	1.68459e-09	0
Trip11	1.39884e-13	0.305682	0.13	0.262	1.89375e-09	0
Tnrc6b	1.44289e-13	0.321446	0.243	0.457	1.95338e-09	0
Myo9a	1.87737e-13	0.266121	0.136	0.27	2.54158e-09	0
Phip	2.42402e-13	0.341969	0.148	0.292	3.28164e-09	0
Gpi1	3.0544e-13	0.433294	0.153	0.3	4.13505e-09	0
Kcmf1	3.30766e-13	0.369708	0.141	0.279	4.47791e-09	0
Myo10	3.78791e-13	0.294664	0.159	0.308	5.12807e-09	0
Birc6	3.85804e-13	0.327408	0.224	0.421	5.22302e-09	0
Chpt1	3.8702e-13	0.9569	0.36	0.324	5.23948e-09	0
Nhs	7.23026e-13	0.520819	0.428	0.36	9.78833e-09	0
Peak1	1.02069e-12	0.262565	0.302	0.559	1.38181e-08	0
Chka	1.16944e-12	1.05182	0.256	0.197	1.58319e-08	0
Ppp2r5e	1.2301e-12	0.364812	0.151	0.292	1.6653e-08	0
Btbd9	1.27056e-12	0.300679	0.179	0.337	1.72009e-08	0
Cyp2j13	1.4102e-12	0.719244	0.3	0.231	1.90913e-08	0
Smchd1	1.62825e-12	0.388854	0.138	0.271	2.20432e-08	0
Ptprk	2.11153e-12	0.77634	0.444	0.44	2.85859e-08	0
Tasor	2.43924e-12	0.36392	0.159	0.303	3.30224e-08	0
Gramd1b	2.70568e-12	0.641877	0.327	0.258	3.66295e-08	0
Dleu2	3.40638e-12	0.336882	0.164	0.309	4.61156e-08	0
Cped1	4.16612e-12	0.394209	0.132	0.259	5.64009e-08	0
Sbf2	5.30537e-12	0.4547	0.199	0.373	7.18242e-08	0
Tgfbr3	6.39792e-12	0.342516	0.133	0.259	8.6615e-08	0
Ogdh	7.05949e-12	0.370271	0.186	0.346	9.55714e-08	0
Ddx5	9.99057e-12	0.685605	0.576	0.75	1.35252e-07	0
Wwc2	1.15468e-11	0.345251	0.254	0.465	1.56321e-07	0
Clint1	1.36885e-11	0.326761	0.155	0.289	1.85315e-07	0
Sgms1	1.64706e-11	0.363633	0.203	0.371	2.22978e-07	0
Gpc4	1.69815e-11	0.771158	0.28	0.218	2.29896e-07	0
Akap9	2.44773e-11	0.389085	0.173	0.319	3.31373e-07	0
Ubr3	2.75788e-11	0.382284	0.149	0.281	3.73361e-07	0
Tacc1	3.65715e-11	0.484574	0.182	0.337	4.95106e-07	0
Kmt2c	3.73829e-11	0.409451	0.211	0.386	5.0609e-07	0
Tmcc3	4.84013e-11	0.398497	0.165	0.305	6.55256e-07	0
Itpr2	5.46114e-11	1.03349	0.365	0.35	7.39329e-07	0
Cflar	6.66574e-11	0.35156	0.23	0.412	9.02408e-07	0
Sugct	6.73343e-11	0.633582	0.312	0.252	9.11571e-07	0
Rbpms	7.92116e-11	0.294797	0.321	0.579	1.07237e-06	0
Nlk	9.84714e-11	0.471082	0.141	0.265	1.33311e-06	0
Usp34	1.09251e-10	0.382397	0.259	0.464	1.47904e-06	0
Slc13a1	1.41753e-10	0.592027	0.311	0.252	1.91906e-06	0
Crebbp	1.4204e-10	0.387281	0.226	0.405	1.92294e-06	0
Slc22a28	1.62488e-10	0.760193	0.25	0.192	2.19976e-06	0
Mtss1	2.61781e-10	0.394525	0.232	0.41	3.54399e-06	0
Ncor1	3.02095e-10	0.361345	0.299	0.535	4.08976e-06	0
Trip12	3.47725e-10	0.398921	0.199	0.355	4.7075e-06	0
Fam172a	4.12744e-10	0.401484	0.176	0.318	5.58773e-06	0
Bcl2l1	4.40305e-10	0.393888	0.159	0.288	5.96084e-06	0
Cgnl1	5.36766e-10	0.879622	0.32	0.284	7.26673e-06	0
Erc2	5.51207e-10	0.633736	0.344	0.291	7.46224e-06	0
Mertk	5.80286e-10	0.446454	0.176	0.315	7.85591e-06	0
Slc12a6	5.88951e-10	0.397954	0.158	0.284	7.97322e-06	0
Rreb1	6.98741e-10	0.327832	0.167	0.298	9.45956e-06	0
Igfbp7	7.68835e-10	0.722515	0.44	0.444	1.04085e-05	0
Pan3	7.70794e-10	0.410559	0.204	0.361	1.0435e-05	0
Itch	8.14566e-10	0.399164	0.198	0.351	1.10276e-05	0
Mbd5	1.52383e-09	0.422364	0.194	0.343	2.06296e-05	0
Mfsd4b5	1.64292e-09	0.697031	0.299	0.248	2.22418e-05	0
Braf	2.00779e-09	0.333527	0.14	0.252	2.71815e-05	0
Ddx39b	2.11227e-09	0.446535	0.145	0.261	2.8596e-05	0
Ppp6r3	2.1311e-09	0.454205	0.171	0.304	2.88509e-05	0
Fndc3b	2.60383e-09	0.384115	0.202	0.352	3.52506e-05	0
Dcaf8	3.07406e-09	0.37303	0.144	0.258	4.16167e-05	0
Smg6	3.28472e-09	0.388023	0.182	0.317	4.44685e-05	0
Tcf7l2	3.31184e-09	0.392273	0.166	0.293	4.48357e-05	0
Mark3	5.52704e-09	0.409511	0.19	0.33	7.48251e-05	0
Etv6	5.75417e-09	0.406465	0.21	0.361	7.78999e-05	0
Hnrnpr	5.79551e-09	0.530373	0.152	0.271	7.84597e-05	0
Clk1	7.44338e-09	0.472688	0.173	0.304	0.000100769	0
Phldb2	8.38931e-09	0.746613	0.444	0.48	0.000113574	0
Wwox	9.12446e-09	0.727722	0.388	0.381	0.000123527	0
Nipbl	1.23387e-08	0.416608	0.29	0.506	0.000167042	0
Ccar1	1.85555e-08	0.343136	0.159	0.275	0.000251204	0
Wwp1	2.90199e-08	0.345978	0.155	0.267	0.000392871	0
Huwe1	5.25287e-08	0.470285	0.209	0.355	0.000711134	0
Hnf1b	6.63143e-08	0.663198	0.251	0.204	0.000897763	0
Arfgef1	7.58787e-08	0.458295	0.18	0.307	0.00102725	0
Cpeb4	8.11207e-08	0.398445	0.174	0.293	0.00109821	0
Mkln1	1.35638e-07	0.434848	0.227	0.381	0.00183627	0
Tnrc6c	1.47563e-07	0.494336	0.24	0.405	0.00199771	0
Srsf2	1.79489e-07	0.583798	0.214	0.362	0.00242992	0
Wdr33	1.81606e-07	0.575938	0.185	0.312	0.00245858	0
Phf21a	2.96469e-07	0.457741	0.221	0.365	0.00401359	0
Sik3	3.33843e-07	0.400147	0.24	0.394	0.00451957	0
Ubn2	3.42033e-07	0.466395	0.235	0.392	0.00463045	0
Aff1	3.57098e-07	0.480368	0.155	0.261	0.00483439	0
Luc7l2	4.31285e-07	0.490173	0.282	0.478	0.00583873	0
Phactr1	4.54538e-07	1.16689	0.268	0.25	0.00615354	0
Mllt10	5.1854e-07	0.489917	0.226	0.377	0.00702	0
Fnip2	5.38675e-07	0.341802	0.179	0.292	0.00729258	0
Gm19951	5.45231e-07	0.791811	0.446	0.513	0.00738133	0
Sbno1	5.52077e-07	0.518326	0.152	0.255	0.00747402	0
Prkg1	5.75497e-07	0.312505	0.295	0.481	0.00779108	0
Thsd7a	6.37242e-07	0.373538	0.195	0.319	0.00862698	0
Ppm1h	6.437e-07	0.803068	0.291	0.267	0.00871441	0
Lpp	6.50271e-07	0.4401	0.266	0.442	0.00880337	0
Osbpl3	7.09252e-07	0.58177	0.265	0.223	0.00960186	0
Fabp4	0	2.00403	0.964	0.412	0	1
Rsad2	7.33375e-287	1.59093	0.9	0.337	9.92843e-283	1
Rps29	1.39158e-282	1.34864	0.985	0.552	1.88392e-278	1
Rps28	2.29981e-274	1.43219	0.938	0.428	3.11349e-270	1
Rps27	1.19195e-266	1.31115	0.98	0.507	1.61367e-262	1
Hspb1	1.66305e-266	1.65419	0.873	0.365	2.25144e-262	1
Rps21	4.32301e-261	1.27777	0.972	0.514	5.85249e-257	1
Ptma	9.77314e-255	1.27613	0.978	0.503	1.32309e-250	1
Bst2	2.65708e-250	1.56351	0.854	0.341	3.59715e-246	1
Rpl35a	7.44215e-234	1.23601	0.961	0.48	1.00752e-229	1
Rpl37a	8.42294e-232	1.19556	0.972	0.527	1.1403e-227	1
Plvap	2.57442e-231	1.1462	0.933	0.348	3.48525e-227	1
Rpl27a	4.1433e-228	1.20617	0.966	0.484	5.6092e-224	1
AY036118	3.88838e-227	1.42299	0.949	0.499	5.26409e-223	1
Flt1	2.16816e-224	1.27834	0.963	0.52	2.93526e-220	1
Rpl9	2.30456e-224	1.19118	0.965	0.471	3.11991e-220	1
Rps23	6.22972e-213	1.14515	0.956	0.459	8.43379e-209	1
Rps24	1.21627e-211	1.12035	0.975	0.536	1.64658e-207	1
Rps15a	1.61539e-211	1.18101	0.939	0.456	2.18692e-207	1
Rps18	4.53039e-211	1.1448	0.936	0.445	6.13324e-207	1
Ly6c1	8.31042e-206	1.12933	0.969	0.478	1.12506e-201	1
Rpl30	2.76286e-204	1.13852	0.932	0.449	3.74036e-200	1
Rps19	6.09834e-204	1.16247	0.951	0.516	8.25593e-200	1
Rpl39	1.96711e-202	1.11362	0.925	0.445	2.66307e-198	1
Rpl37	8.73262e-200	1.08004	0.965	0.535	1.18222e-195	1
Rpl34	5.56426e-197	1.10292	0.94	0.455	7.53289e-193	1
B2m	1.95463e-196	1.09695	0.972	0.469	2.64617e-192	1
Gnas	7.66191e-196	1.09307	0.968	0.515	1.03727e-191	1
Fau	1.0266e-195	1.03923	0.972	0.621	1.38982e-191	1
Pbx1	1.28865e-195	1.08543	0.99	0.761	1.74457e-191	1
Rps8	3.83916e-192	1.01809	0.978	0.544	5.19745e-188	1
Rpl32	4.60874e-192	1.09189	0.931	0.468	6.23931e-188	1
Ppia	7.00833e-192	1.09344	0.954	0.462	9.48787e-188	1
Rps14	3.58133e-191	1.07273	0.96	0.493	4.84841e-187	1
Rdx	3.68203e-190	1.27034	0.877	0.465	4.98473e-186	1
Kitl	8.25912e-190	1.44859	0.756	0.334	1.11812e-185	1
Rpl23	3.77779e-189	1.04498	0.96	0.506	5.11437e-185	1
Tpt1	9.31243e-189	1.01812	0.979	0.581	1.26072e-184	1
Cyyr1	3.02948e-188	1.25809	0.827	0.387	4.10131e-184	1
Btg1	1.64016e-186	1.3984	0.711	0.301	2.22044e-182	1
Rps7	3.90187e-185	1.10385	0.891	0.412	5.28235e-181	1
Rps5	8.81775e-184	1.08204	0.907	0.431	1.19375e-179	1
Eif1	1.21612e-183	1.07928	0.935	0.452	1.64639e-179	1
Uba52	1.51333e-182	1.05046	0.954	0.5	2.04875e-178	1
Cdh5	3.08205e-182	1.15434	0.813	0.356	4.17248e-178	1
Rps27a	2.21239e-181	1.03003	0.928	0.481	2.99513e-177	1
Ly6e	2.68195e-181	1.02763	0.982	0.526	3.63082e-177	1
Rps20	1.65877e-180	1.01291	0.934	0.494	2.24565e-176	1
Plscr2	3.15002e-179	1.20866	0.883	0.445	4.26449e-175	1
Rps10	2.72864e-178	1.01184	0.938	0.476	3.69403e-174	1
Nrp1	3.18235e-177	1.06527	0.961	0.589	4.30827e-173	1
Rps3	8.72487e-177	1.0622	0.906	0.44	1.18117e-172	1
Kdr	2.83516e-176	1.25359	0.844	0.376	3.83824e-172	1
Rpl24	8.68525e-176	1.06843	0.896	0.459	1.17581e-171	1
Calm1	6.90864e-175	1.00613	0.938	0.442	9.35291e-171	1
Meis2	5.58499e-174	1.05987	0.968	0.61	7.56096e-170	1
Rpl6	1.91322e-173	1.06076	0.891	0.452	2.59012e-169	1
S100a13	2.50659e-172	1.09171	0.835	0.39	3.39343e-168	1
Ifi203	3.86003e-172	1.35526	0.709	0.307	5.2257e-168	1
Rpl35	1.54141e-171	1.03926	0.893	0.448	2.08675e-167	1
Rps13	3.08988e-170	1.04399	0.897	0.442	4.18308e-166	1
Rps11	6.04446e-169	1.01244	0.905	0.452	8.18299e-165	1
Rpl19	6.44049e-168	0.983479	0.941	0.481	8.71914e-164	1
Ifitm2	7.58165e-168	1.00481	0.904	0.41	1.0264e-163	1
Rpl38	2.49847e-166	0.991617	0.931	0.558	3.38243e-162	1
Ly6a	6.13392e-165	0.990113	0.952	0.522	8.3041e-161	1
Rps16	8.90744e-164	0.956871	0.93	0.465	1.20589e-159	1
Rps3a1	3.24975e-162	0.999779	0.876	0.429	4.39951e-158	1
H2-D1	3.62707e-162	0.926863	0.964	0.462	4.91033e-158	1
Rpl36	4.81246e-162	0.968662	0.938	0.557	6.51511e-158	1
Rgcc	9.30282e-161	1.03617	0.725	0.268	1.25942e-156	1
Tcf4	3.90527e-160	1.08062	0.919	0.565	5.28695e-156	1
Ptprb	2.30661e-159	0.991391	0.924	0.491	3.12268e-155	1
Ifitm3	5.40561e-159	0.940641	0.953	0.452	7.31811e-155	1
Txn1	1.90478e-158	1.07277	0.804	0.373	2.57869e-154	1
Ehd4	1.3852e-157	1.09087	0.833	0.394	1.87528e-153	1
Tmsb4x	4.65114e-157	0.875124	0.982	0.536	6.29672e-153	1
Rplp2	2.80372e-156	0.969172	0.892	0.457	3.79568e-152	1
Clic5	1.41319e-154	1.14611	0.773	0.388	1.91317e-150	1
Rpl41	1.6519e-154	0.845764	0.968	0.661	2.23634e-150	1
Chchd2	4.8019e-154	0.970306	0.888	0.469	6.50081e-150	1
Rps26	3.29243e-153	0.956511	0.828	0.414	4.45729e-149	1
Rps4x	6.79393e-153	0.948174	0.884	0.439	9.19762e-149	1
Mef2c	1.62886e-152	1.15527	0.772	0.37	2.20515e-148	1
Rpl8	8.948e-152	0.951865	0.915	0.506	1.21138e-147	1
Adgrl4	9.67586e-152	1.01319	0.877	0.448	1.30992e-147	1
Igfbp5	4.78974e-151	1.51342	0.82	0.491	6.48435e-147	1
Plpp3	1.48099e-149	0.98176	0.881	0.444	2.00496e-145	1
Rps9	2.17499e-149	0.927512	0.889	0.452	2.9445e-145	1
Esm1	2.65169e-149	1.35007	0.601	0.218	3.58986e-145	1
Rpl18	5.7269e-148	0.913503	0.888	0.44	7.75308e-144	1
Sparc	3.02458e-147	0.901094	0.894	0.429	4.09468e-143	1
Rpl27	1.23979e-146	0.977684	0.826	0.406	1.67843e-142	1
Rpl22	2.54859e-146	0.99284	0.822	0.41	3.45028e-142	1
Rpl26	5.28676e-146	0.899232	0.913	0.472	7.15722e-142	1
Gng5	2.17908e-144	1.0021	0.784	0.371	2.95004e-140	1
Sparcl1	1.23834e-143	1.39841	0.56	0.205	1.67646e-139	1
Rplp1	7.2008e-143	0.849818	0.963	0.577	9.74845e-139	1
Hsp90ab1	3.57109e-142	0.922779	0.943	0.576	4.83454e-138	1
Rpl21	5.04199e-141	0.878543	0.932	0.52	6.82585e-137	1
Btnl9	6.64423e-141	1.35378	0.524	0.183	8.99495e-137	1
Hmgb1	9.27722e-141	0.946226	0.845	0.427	1.25595e-136	1
Id3	1.33332e-140	0.97009	0.841	0.385	1.80505e-136	1
Cd200	3.75467e-139	1.06696	0.748	0.343	5.08307e-135	1
Tm4sf1	4.01825e-139	0.873261	0.885	0.434	5.43991e-135	1
H3f3b	4.50485e-137	0.93418	0.86	0.417	6.09866e-133	1
Rpl10	9.57945e-137	0.872991	0.86	0.434	1.29687e-132	1
Eef1a1	1.98898e-134	0.80751	0.965	0.564	2.69269e-130	1
H3f3a	5.17775e-134	0.884638	0.883	0.43	7.00963e-130	1
Arhgap31	5.58403e-134	1.04072	0.763	0.387	7.55966e-130	1
Ubb	1.30274e-133	0.847578	0.922	0.441	1.76364e-129	1
Slc9a3r2	1.31147e-132	0.945054	0.853	0.439	1.77547e-128	1
Tnfsf10	4.77278e-131	1.08295	0.648	0.283	6.46139e-127	1
Clec2d	1.72672e-129	1.08025	0.724	0.353	2.33764e-125	1
Fabp5	4.09013e-129	1.54396	0.529	0.202	5.53722e-125	1
Rpl36a	1.52158e-128	0.867479	0.774	0.384	2.05992e-124	1
Ifi44	2.46822e-128	1.20273	0.605	0.254	3.34148e-124	1
Ebf1	3.0967e-128	0.998685	0.871	0.505	4.19231e-124	1
Gimap6	6.63188e-128	0.944457	0.752	0.355	8.97824e-124	1
Rpl13	1.53223e-127	0.803005	0.962	0.608	2.07433e-123	1
Pcdh17	8.18614e-126	1.2409	0.615	0.271	1.10824e-121	1
Cd93	1.82598e-125	1.09472	0.62	0.271	2.47202e-121	1
Ctla2a	6.34726e-125	1.15257	0.645	0.291	8.59292e-121	1
Rps12	1.79474e-124	0.811728	0.906	0.5	2.42972e-120	1
Rps25	3.51518e-124	0.852485	0.841	0.44	4.75884e-120	1
Laptm4a	3.78466e-124	0.897432	0.851	0.42	5.12367e-120	1
Txnip	2.32091e-123	0.928939	0.783	0.39	3.14205e-119	1
Emcn	3.79276e-123	0.783429	0.957	0.523	5.13464e-119	1
Rasgrp3	1.11914e-121	1.01047	0.669	0.321	1.51509e-117	1
Plpp1	8.35186e-121	0.767125	0.916	0.49	1.13067e-116	1
Rps17	4.62162e-119	0.861467	0.813	0.428	6.25675e-115	1
Pdgfb	9.63397e-119	1.07851	0.631	0.294	1.30425e-114	1
Cd300lg	9.50942e-117	0.964576	0.675	0.296	1.28739e-112	1
S100a10	2.51233e-116	0.882851	0.767	0.375	3.4012e-112	1
Gng11	3.01461e-116	0.9775	0.778	0.383	4.08119e-112	1
S100a6	3.40249e-116	1.06651	0.696	0.336	4.60628e-112	1
Slfn5	4.86721e-116	1.0262	0.694	0.346	6.58923e-112	1
Adgrf5	1.40084e-115	0.89573	0.793	0.427	1.89645e-111	1
Mndal	1.02571e-114	1.0188	0.67	0.334	1.38861e-110	1
Srgn	1.02225e-113	0.767673	0.825	0.39	1.38393e-109	1
Cox8a	4.16847e-113	0.843389	0.788	0.421	5.64328e-109	1
Rps6	6.29104e-113	0.857396	0.74	0.376	8.51681e-109	1
Gpihbp1	7.07867e-113	0.917929	0.605	0.249	9.5831e-109	1
Ccdc85b	1.09995e-112	0.93248	0.643	0.312	1.48911e-108	1
Elk3	2.25771e-111	0.932407	0.706	0.361	3.05649e-107	1
Vamp5	8.42171e-111	0.929174	0.688	0.332	1.14013e-106	1
Tcim	1.84495e-110	0.832807	0.709	0.311	2.4977e-106	1
Crip1	2.57086e-110	0.753042	0.698	0.339	3.48042e-106	1
Rpl7	4.36711e-109	0.807157	0.804	0.414	5.9122e-105	1
Naca	4.43421e-109	0.841162	0.724	0.379	6.00303e-105	1
Itpkb	1.37741e-108	0.981405	0.652	0.331	1.86473e-104	1
AW112010	7.51212e-108	1.06316	0.512	0.2	1.01699e-103	1
Rpl12	1.37165e-107	0.82005	0.74	0.38	1.85694e-103	1
Rpl18a	1.39634e-107	0.73814	0.908	0.536	1.89036e-103	1
Sem1	2.13032e-107	0.859093	0.677	0.336	2.88403e-103	1
H2-K1	2.79839e-107	0.726113	0.915	0.503	3.78847e-103	1
Rapgef5	3.51471e-107	1.02971	0.638	0.324	4.75821e-103	1
Egfl7	1.49441e-106	0.780044	0.884	0.47	2.02313e-102	1
Ets1	1.78848e-106	0.910516	0.66	0.335	2.42125e-102	1
Rpl11	6.04732e-106	0.777955	0.861	0.471	8.18686e-102	1
Rpl17	9.2619e-106	0.770139	0.857	0.458	1.25388e-101	1
Podxl	1.05807e-105	0.826646	0.836	0.467	1.43241e-101	1
Chrm3	1.06969e-105	1.00964	0.761	0.429	1.44815e-101	1
Hes1	1.26874e-105	1.23647	0.517	0.225	1.71762e-101	1
Selenom	8.96861e-105	0.924727	0.662	0.331	1.21417e-100	1
Hspg2	2.5964e-104	0.974686	0.608	0.29	3.51501e-100	1
Psme1	1.07388e-103	0.904229	0.629	0.305	1.45381e-99	1
Crip2	9.87272e-103	0.843738	0.76	0.395	1.33657e-98	1
Cd34	4.28082e-102	0.947165	0.622	0.301	5.79537e-98	1
Serf2	5.23043e-102	0.752288	0.801	0.437	7.08095e-98	1
Il10rb	1.0407e-100	1.03848	0.538	0.253	1.40889e-96	1
Rpl3	2.25471e-100	0.744888	0.801	0.432	3.05243e-96	1
Pecam1	2.40876e-100	0.731038	0.844	0.448	3.26098e-96	1
Gngt2	3.14436e-100	0.958947	0.564	0.266	4.25684e-96	1
Cst3	4.74127e-100	0.642006	0.859	0.482	6.41873e-96	1
Itgb1	5.75871e-100	0.824548	0.76	0.423	7.79614e-96	1
Tmem204	7.03364e-100	0.969266	0.567	0.265	9.52214e-96	1
Tomm7	3.33314e-99	0.877788	0.603	0.297	4.51241e-95	1
Rpl7a	2.49576e-98	0.812074	0.688	0.356	3.37875e-94	1
4931406P16Rik	4.883e-98	0.87539	0.671	0.355	6.6106e-94	1
Cox7a2	5.55776e-98	0.798557	0.719	0.388	7.5241e-94	1
Selenok	9.65048e-98	0.876143	0.634	0.325	1.30648e-93	1
Ndufa4	3.04587e-96	0.77842	0.747	0.405	4.1235e-92	1
Sptbn1	3.9019e-96	0.727049	0.925	0.621	5.28239e-92	1
Cd81	5.71142e-96	0.712598	0.876	0.451	7.73212e-92	1
Atp5j	7.12182e-96	0.821152	0.684	0.37	9.64153e-92	1
Elob	7.83522e-96	0.771463	0.71	0.386	1.06073e-91	1
Rnf144a	1.85674e-95	1.02177	0.5	0.225	2.51366e-91	1
Tnfaip2	7.87518e-95	1.01521	0.623	0.323	1.06614e-90	1
Dynll1	3.23521e-93	0.741515	0.712	0.364	4.37983e-89	1
Selenow	1.845e-91	0.805419	0.689	0.371	2.49776e-87	1
Rpl29	4.99951e-91	0.722418	0.773	0.417	6.76833e-87	1
Kctd12b	3.59576e-90	1.14874	0.447	0.194	4.86794e-86	1
Rps2	8.52153e-90	0.69369	0.812	0.458	1.15364e-85	1
Tek	2.60314e-89	0.79814	0.727	0.394	3.52413e-85	1
Epas1	4.10093e-89	0.717365	0.796	0.437	5.55185e-85	1
Itm2b	1.63926e-88	0.60122	0.909	0.511	2.21923e-84	1
Atox1	3.55711e-88	0.719639	0.764	0.42	4.81562e-84	1
Mal	7.29592e-88	1.01754	0.517	0.243	9.87721e-84	1
Ets2	1.43275e-86	0.978062	0.508	0.244	1.93966e-82	1
Hint1	2.65973e-86	0.760643	0.624	0.339	3.60074e-82	1
Rabac1	3.40635e-86	0.765461	0.68	0.368	4.61152e-82	1
Lmo2	5.57969e-86	0.877355	0.572	0.292	7.55379e-82	1
Rpl28	1.96931e-85	0.639584	0.943	0.644	2.66605e-81	1
Id1	2.78815e-85	0.862436	0.623	0.311	3.77459e-81	1
Fam117b	4.96449e-85	0.840626	0.66	0.367	6.72093e-81	1
Gnai2	2.50421e-84	0.681165	0.776	0.409	3.39019e-80	1
Igfbp3	3.60705e-84	0.778421	0.563	0.26	4.88322e-80	1
Klf2	6.99321e-84	0.696195	0.716	0.362	9.46741e-80	1
Cmpk2	2.21938e-83	1.03734	0.37	0.143	3.00459e-79	1
Rapgef4	4.53637e-83	0.828837	0.642	0.349	6.14133e-79	1
Sgk1	1.05806e-82	0.800389	0.669	0.345	1.43241e-78	1
H2-T23	1.82586e-82	0.785735	0.618	0.299	2.47185e-78	1
Ushbp1	2.01339e-81	0.904584	0.532	0.272	2.72573e-77	1
3110099E03Rik	5.29163e-81	1.04656	0.403	0.168	7.16381e-77	1
Klf7	1.04002e-80	0.78656	0.643	0.35	1.40798e-76	1
Serinc3	1.25594e-80	0.684115	0.789	0.443	1.70029e-76	1
S1pr1	1.48829e-80	1.00745	0.452	0.211	2.01484e-76	1
Clic4	2.97401e-80	0.711041	0.751	0.429	4.02621e-76	1
Psme2	4.66806e-80	0.834835	0.472	0.221	6.31962e-76	1
Ptprm	1.04402e-79	0.779759	0.781	0.478	1.4134e-75	1
Ost4	2.90688e-79	0.887718	0.512	0.261	3.93534e-75	1
Psma7	4.96491e-79	0.807849	0.6	0.325	6.7215e-75	1
Tie1	8.41922e-79	0.804513	0.604	0.324	1.13979e-74	1
Anp32a	2.47718e-78	0.831554	0.566	0.303	3.35361e-74	1
Efnb2	3.86121e-78	0.78194	0.568	0.288	5.22731e-74	1
Esam	1.30762e-77	0.799961	0.618	0.331	1.77026e-73	1
B230219D22Rik	1.54204e-77	0.854938	0.524	0.269	2.08762e-73	1
Cox7c	1.64151e-77	0.718998	0.678	0.39	2.22227e-73	1
Snrpb	7.44831e-76	0.809867	0.536	0.281	1.00835e-71	1
Fam167b	4.56856e-75	0.938396	0.472	0.223	6.18491e-71	1
Rhob	7.694e-75	0.781464	0.596	0.312	1.04161e-70	1
Cox6c	9.23662e-74	0.643484	0.744	0.435	1.25045e-69	1
Tmsb10	1.2729e-73	0.628037	0.6	0.307	1.72325e-69	1
Eng	1.27371e-73	0.67429	0.786	0.458	1.72434e-69	1
Gabarapl2	4.62913e-73	0.796517	0.509	0.265	6.26691e-69	1
Snrpg	9.84361e-73	0.790928	0.503	0.262	1.33263e-68	1
Sumo2	1.92999e-72	0.71408	0.598	0.332	2.61282e-68	1
Psmb8	3.01419e-72	0.756506	0.573	0.289	4.08061e-68	1
Etl4	1.74918e-71	0.80782	0.685	0.417	2.36804e-67	1
Cox6b1	1.89659e-71	0.686808	0.641	0.371	2.56761e-67	1
Cd47	4.56135e-71	0.706131	0.666	0.362	6.17516e-67	1
Anxa2	5.77413e-71	0.714349	0.627	0.347	7.81702e-67	1
Sox17	2.73828e-70	0.910544	0.486	0.237	3.70709e-66	1
Pfdn5	9.91524e-69	0.644873	0.65	0.38	1.34233e-64	1
Calcrl	9.96694e-69	0.696137	0.663	0.371	1.34932e-64	1
Ppib	1.12737e-68	0.657762	0.624	0.343	1.52624e-64	1
Tspo	1.64827e-68	0.665748	0.591	0.32	2.23142e-64	1
Exoc3l2	1.66136e-68	0.746903	0.636	0.341	2.24915e-64	1
Slc38a2	2.19744e-68	0.792736	0.473	0.239	2.97489e-64	1
Tmem59	4.40167e-68	0.659391	0.625	0.346	5.95898e-64	1
Trim30a	4.61442e-68	0.686594	0.54	0.286	6.247e-64	1
Prkch	1.35232e-67	0.733435	0.603	0.339	1.83077e-63	1
Cd24a	1.78805e-67	0.891463	0.487	0.248	2.42066e-63	1
Cd9	1.92711e-67	0.76754	0.589	0.323	2.60892e-63	1
Edf1	2.19443e-67	0.760071	0.54	0.298	2.97082e-63	1
Mef2a	3.91579e-67	0.723685	0.637	0.379	5.30119e-63	1
Erg	5.13926e-67	0.83642	0.495	0.262	6.95753e-63	1
Sec61g	7.38759e-67	0.771622	0.508	0.273	1.00013e-62	1
Col4a1	2.0377e-66	0.671742	0.707	0.414	2.75864e-62	1
Lrrc8c	2.20912e-66	0.812477	0.504	0.268	2.9907e-62	1
Rpl22l1	3.0834e-66	0.845603	0.456	0.231	4.17431e-62	1
Myl12b	7.26781e-66	0.61914	0.653	0.367	9.83916e-62	1
Dpm3	2.20048e-65	0.76512	0.446	0.223	2.97901e-61	1
Snrk	2.26881e-65	0.774544	0.543	0.3	3.07151e-61	1
Rbms2	6.30327e-65	0.916734	0.577	0.341	8.53337e-61	1
Cmtm8	8.00136e-65	0.745737	0.542	0.284	1.08322e-60	1
Myl12a	9.40559e-65	0.677105	0.606	0.332	1.27333e-60	1
Rhoa	1.48453e-64	0.582826	0.692	0.398	2.00976e-60	1
Gm35533	3.17447e-64	1.60358	0.25	0.08	4.2976e-60	1
Atp5h	3.286e-64	0.568673	0.664	0.387	4.44859e-60	1
Rpl23a	4.20795e-64	0.649964	0.604	0.34	5.69672e-60	1
Morf4l1	5.427e-64	0.749038	0.534	0.302	7.34707e-60	1
Gm12002	6.03335e-64	0.925584	0.319	0.127	8.16795e-60	1
Jup	1.55276e-63	0.740978	0.522	0.278	2.10213e-59	1
Smco4	2.80784e-63	0.751676	0.504	0.272	3.80125e-59	1
Rflnb	3.44633e-63	0.800794	0.462	0.231	4.66565e-59	1
Apoe	6.23505e-63	0.78514	0.574	0.321	8.44101e-59	1
1700025G04Rik	1.70808e-62	0.919461	0.406	0.196	2.3124e-58	1
Sox18	1.78373e-62	0.634447	0.588	0.311	2.41482e-58	1
Dusp3	1.93512e-62	0.764146	0.508	0.275	2.61977e-58	1
Sh3glb1	1.9356e-62	0.695997	0.632	0.378	2.62041e-58	1
Clta	2.29413e-62	0.657749	0.56	0.316	3.10579e-58	1
Ndufa7	4.04557e-62	0.72527	0.528	0.294	5.47689e-58	1
Ahnak	7.57284e-62	0.723776	0.585	0.341	1.02521e-57	1
Rack1	8.13334e-62	0.567767	0.685	0.395	1.10109e-57	1
S100a16	1.4391e-61	0.662924	0.576	0.32	1.94826e-57	1
Hip1	3.25069e-61	0.743893	0.586	0.353	4.40078e-57	1
Isg15	3.58295e-61	1.23053	0.33	0.138	4.85059e-57	1
Calm2	6.34546e-61	0.623687	0.644	0.371	8.59048e-57	1
Cdc14a	7.59681e-61	0.78122	0.538	0.306	1.02846e-56	1
Oaz1	9.95946e-61	0.667782	0.556	0.321	1.34831e-56	1
Actb	1.70637e-60	0.424884	0.956	0.665	2.31009e-56	1
Dysf	3.0016e-60	0.747418	0.568	0.33	4.06357e-56	1
Pde2a	3.64833e-60	0.796585	0.482	0.262	4.93911e-56	1
Ctnnb1	6.10764e-60	0.671268	0.599	0.361	8.26852e-56	1
Msn	1.12917e-59	0.679411	0.586	0.345	1.52867e-55	1
Ywhae	1.18338e-59	0.619135	0.602	0.36	1.60206e-55	1
Npr3	1.20213e-59	1.25641	0.361	0.162	1.62745e-55	1
Rps27l	4.3447e-59	0.686049	0.494	0.272	5.88185e-55	1
Heg1	6.37399e-59	0.607234	0.644	0.38	8.62911e-55	1
Rap1b	7.22904e-59	0.681623	0.564	0.324	9.78668e-55	1
Tgfbr2	7.28436e-59	0.699456	0.569	0.334	9.86157e-55	1
Cavin3	7.6144e-59	0.603791	0.593	0.323	1.03084e-54	1
Ramp2	8.05713e-59	0.636031	0.607	0.337	1.09077e-54	1
Slc6a6	9.30966e-59	0.644253	0.729	0.462	1.26034e-54	1
Ccdc85a	2.14142e-58	0.889692	0.3	0.12	2.89906e-54	1
Pomp	2.99189e-58	0.717572	0.523	0.291	4.05042e-54	1
Ifnar2	3.14813e-58	0.677999	0.551	0.309	4.26194e-54	1
Dnm3	8.70507e-58	0.726067	0.639	0.4	1.17849e-53	1
Mmrn2	1.15898e-57	0.735792	0.541	0.311	1.56903e-53	1
Wasf2	1.36855e-57	0.58704	0.652	0.405	1.85275e-53	1
Atp1b3	2.35832e-57	0.838207	0.425	0.221	3.1927e-53	1
Dync1i2	4.67568e-57	0.799924	0.518	0.297	6.32993e-53	1
1810037I17Rik	9.03767e-57	0.695109	0.497	0.279	1.22352e-52	1
Tinagl1	1.36525e-56	0.712601	0.512	0.273	1.84827e-52	1
Snx3	1.58214e-56	0.637842	0.547	0.316	2.1419e-52	1
Ubl5	1.73677e-56	0.612087	0.518	0.295	2.35124e-52	1
Luzp1	3.01284e-56	0.635956	0.618	0.373	4.07878e-52	1
Uqcrb	3.33854e-56	0.601764	0.54	0.305	4.51972e-52	1
Kctd12	3.96611e-56	0.775208	0.394	0.195	5.36932e-52	1
Clec1a	9.22198e-56	0.818601	0.414	0.213	1.24847e-51	1
Atp5g2	1.29575e-55	0.625893	0.54	0.314	1.75418e-51	1
Uqcrh	2.00698e-55	0.609952	0.574	0.344	2.71705e-51	1
Ndufb1-ps	2.21386e-55	0.6779	0.47	0.259	2.99712e-51	1
Gnb1	1.06328e-54	0.580423	0.637	0.391	1.43946e-50	1
Ifi27	1.23706e-54	0.666816	0.488	0.266	1.67474e-50	1
Amotl1	1.29521e-54	0.772759	0.436	0.236	1.75346e-50	1
Gas5	2.82904e-54	0.603509	0.5	0.283	3.82995e-50	1
Nedd8	4.12507e-54	0.650426	0.514	0.299	5.58451e-50	1
Prkar1a	4.70904e-54	0.7043	0.512	0.298	6.37509e-50	1
Dnaja1	4.78458e-54	0.676237	0.525	0.306	6.47737e-50	1
Ywhab	5.13224e-54	0.684945	0.547	0.319	6.94802e-50	1
Srp14	5.98702e-54	0.703831	0.419	0.222	8.10523e-50	1
Rac1	1.28849e-53	0.636085	0.569	0.344	1.74436e-49	1
Fkbp1a	1.76455e-53	0.571813	0.617	0.362	2.38885e-49	1
Rpl31	1.87209e-53	0.483703	0.675	0.416	2.53443e-49	1
Samd12	3.28914e-53	0.670846	0.605	0.369	4.45284e-49	1
Ldb2	5.34301e-53	0.614738	0.709	0.441	7.23336e-49	1
Anxa5	1.32019e-52	0.625257	0.532	0.307	1.78727e-48	1
Selenof	1.34156e-52	0.596987	0.552	0.315	1.8162e-48	1
Mcc	1.35816e-52	0.661066	0.62	0.38	1.83868e-48	1
Gm10076	2.17587e-52	0.522006	0.607	0.359	2.94569e-48	1
Cpd	4.53219e-52	0.697991	0.508	0.295	6.13567e-48	1
Atp6v1f	4.80161e-52	0.615505	0.46	0.258	6.50043e-48	1
Sp100	5.7951e-52	0.754308	0.493	0.286	7.8454e-48	1
Jun	6.11656e-52	0.777107	0.453	0.244	8.2806e-48	1
Sub1	7.24216e-52	0.724245	0.419	0.228	9.80443e-48	1
Zfp36l1	7.56174e-52	0.649452	0.55	0.326	1.02371e-47	1
Lims2	1.31755e-51	0.656089	0.547	0.315	1.78371e-47	1
Kank3	2.0075e-51	0.700423	0.481	0.276	2.71776e-47	1
Ppp1r2	3.26344e-51	0.694379	0.501	0.297	4.41805e-47	1
Mgll	9.49217e-51	0.669963	0.549	0.326	1.28505e-46	1
Rpl15	1.73607e-50	0.575535	0.52	0.294	2.35029e-46	1
Atp5e	3.37338e-50	0.462852	0.675	0.431	4.56688e-46	1
S100a11	3.53181e-50	0.578406	0.535	0.313	4.78136e-46	1
Rpl10a	3.69959e-50	0.483261	0.708	0.456	5.00851e-46	1
Smdt1	4.09651e-50	0.641999	0.502	0.296	5.54585e-46	1
Ybx1	5.64876e-50	0.518993	0.65	0.402	7.64729e-46	1
Arpc3	5.78527e-50	0.606433	0.546	0.32	7.8321e-46	1
Psma2	8.11775e-50	0.719279	0.435	0.246	1.09898e-45	1
Lrrc3b	1.12209e-49	0.806862	0.303	0.135	1.51908e-45	1
Xiap	1.50633e-49	0.629358	0.527	0.314	2.03927e-45	1
Notch1	1.78875e-49	0.72825	0.438	0.244	2.42161e-45	1
Psmb9	1.92245e-49	0.77264	0.4	0.213	2.60261e-45	1
Ifi27l2a	1.98951e-49	1.39701	0.285	0.121	2.6934e-45	1
Nme2	3.82867e-49	0.481011	0.642	0.401	5.18325e-45	1
Cd38	3.96074e-49	0.732628	0.405	0.213	5.36205e-45	1
Rplp0	4.13531e-49	0.468736	0.681	0.412	5.59838e-45	1
Fmnl3	7.41976e-49	0.72911	0.452	0.261	1.00449e-44	1
Xaf1	1.2423e-48	0.7893	0.358	0.18	1.68182e-44	1
Tmem50a	1.40611e-48	0.641165	0.48	0.283	1.90359e-44	1
Ndufb9	1.62118e-48	0.598798	0.503	0.306	2.19475e-44	1
Bmpr2	3.93257e-48	0.572384	0.604	0.38	5.32392e-44	1
Cd36	4.86487e-48	0.950235	0.413	0.217	6.58606e-44	1
Cbfa2t3	7.18062e-48	0.597106	0.473	0.267	9.72112e-44	1
2023-09-07	7.19031e-48	0.637582	0.513	0.311	9.73425e-44	1
St6galnac3	8.69509e-48	0.677411	0.564	0.353	1.17714e-43	1
Limch1	8.74936e-48	0.534314	0.702	0.453	1.18449e-43	1
Ndufb11	8.89736e-48	0.615778	0.47	0.273	1.20452e-43	1
Chmp2a	1.11551e-47	0.59089	0.492	0.288	1.51018e-43	1
Serbp1	1.27373e-47	0.593344	0.564	0.354	1.72438e-43	1
Rpl14	1.50131e-47	0.481559	0.676	0.422	2.03248e-43	1
Tubb5	1.66337e-47	0.626836	0.428	0.234	2.25186e-43	1
Ptpru	2.22651e-47	0.900095	0.362	0.186	3.01424e-43	1
Clic1	2.8315e-47	0.518676	0.566	0.335	3.83329e-43	1
Krtcap2	3.25991e-47	0.640379	0.449	0.257	4.41327e-43	1
Rab14	4.66427e-47	0.606754	0.515	0.315	6.31449e-43	1
Ece1	5.27471e-47	0.65815	0.54	0.333	7.14091e-43	1
Grcc10	6.41412e-47	0.65862	0.451	0.261	8.68344e-43	1
Eif4g2	1.18548e-46	0.532706	0.601	0.383	1.6049e-42	1
Snrpf	1.20305e-46	0.652629	0.354	0.182	1.62869e-42	1
Hnrnpa0	1.26085e-46	0.668502	0.397	0.217	1.70694e-42	1
Cox17	1.26105e-46	0.70412	0.42	0.235	1.70721e-42	1
Syne1	2.59399e-46	0.541312	0.679	0.441	3.51174e-42	1
Atp5md	4.21928e-46	0.574005	0.444	0.253	5.71205e-42	1
Tmem14c	4.57768e-46	0.684167	0.399	0.223	6.19726e-42	1
Uqcc2	6.46678e-46	0.640195	0.476	0.283	8.75472e-42	1
Tmbim1	6.67249e-46	0.716748	0.317	0.155	9.03321e-42	1
H2afz	1.15294e-45	0.655422	0.47	0.281	1.56084e-41	1
S100a1	2.5104e-45	0.57769	0.456	0.259	3.39858e-41	1
Lats2	3.21742e-45	0.650243	0.431	0.247	4.35574e-41	1
Hnrnpk	3.30711e-45	0.592689	0.515	0.315	4.47717e-41	1
Sh3bgrl3	3.38883e-45	0.53548	0.515	0.306	4.58779e-41	1
Hsp90b1	9.64056e-45	0.529527	0.672	0.45	1.30514e-40	1
Psmb1	1.1914e-44	0.546765	0.465	0.275	1.61292e-40	1
Dad1	1.2639e-44	0.557291	0.457	0.269	1.71107e-40	1
Map1lc3b	1.2663e-44	0.593268	0.478	0.281	1.71432e-40	1
Fbxl7	1.82528e-44	0.725405	0.548	0.338	2.47107e-40	1
Mrpl33	2.39093e-44	0.645223	0.405	0.228	3.23684e-40	1
Rpl36al	3.24625e-44	0.540776	0.491	0.297	4.39478e-40	1
Rnasek	3.44067e-44	0.604278	0.484	0.295	4.65798e-40	1
Snrpe	3.96668e-44	0.676146	0.367	0.199	5.37009e-40	1
Bvht	6.09256e-44	0.694337	0.362	0.191	8.2481e-40	1
Prdx1	6.65032e-44	0.481745	0.643	0.411	9.0032e-40	1
Atp5j2	9.72679e-44	0.47484	0.595	0.377	1.31681e-39	1
Fgd5	1.08559e-43	0.529174	0.531	0.327	1.46967e-39	1
Tomm6	2.74556e-43	0.578845	0.443	0.259	3.71694e-39	1
Nfkbia	5.43743e-43	0.633645	0.461	0.271	7.3612e-39	1
Rbx1	7.73229e-43	0.533425	0.513	0.317	1.0468e-38	1
Arhgap29	7.90643e-43	0.578333	0.565	0.357	1.07037e-38	1
Tmtc2	8.69397e-43	0.757831	0.362	0.185	1.17699e-38	1
Ndufa13	1.12197e-42	0.515996	0.505	0.315	1.51892e-38	1
Crispld1	1.21952e-42	0.761602	0.3	0.143	1.65099e-38	1
Plscr4	1.56211e-42	0.531834	0.526	0.323	2.11479e-38	1
Cox5b	2.54506e-42	0.497045	0.565	0.362	3.44551e-38	1
Npm1	3.65099e-42	0.578052	0.444	0.264	4.94271e-38	1
Mtdh	4.64431e-42	0.62462	0.579	0.385	6.28747e-38	1
Ednrb	6.28058e-42	0.615975	0.369	0.191	8.50265e-38	1
Gimap4	7.56247e-42	0.519182	0.509	0.295	1.02381e-37	1
Aplp2	9.64942e-42	0.479735	0.672	0.432	1.30634e-37	1
Myct1	1.23928e-41	0.641146	0.435	0.254	1.67774e-37	1
H2afv	1.4331e-41	0.611743	0.417	0.243	1.94014e-37	1
Myl6	1.89038e-41	0.401123	0.877	0.615	2.55919e-37	1
Tpm4	3.24184e-41	0.560756	0.46	0.272	4.3888e-37	1
Dram1	4.1312e-41	0.711213	0.368	0.2	5.59281e-37	1
Ndufa1	5.81408e-41	0.634748	0.395	0.229	7.8711e-37	1
Syf2	6.07439e-41	0.61148	0.403	0.232	8.22351e-37	1
2410006H16Rik	6.63353e-41	0.703999	0.297	0.147	8.98047e-37	1
Atp6v1g1	8.04797e-41	0.601688	0.444	0.272	1.08953e-36	1
Hspa8	1.12009e-40	0.467012	0.779	0.528	1.51638e-36	1
Epha4	1.71384e-40	0.733152	0.327	0.167	2.3202e-36	1
Cdc42	5.58362e-40	0.48763	0.576	0.36	7.55911e-36	1
Lgals9	5.6892e-40	0.664666	0.372	0.206	7.70204e-36	1
Arf1	6.25186e-40	0.53283	0.483	0.299	8.46376e-36	1
Robo4	6.33878e-40	0.672461	0.34	0.181	8.58144e-36	1
Cyth3	6.5706e-40	0.600588	0.384	0.218	8.89527e-36	1
Ptbp3	1.26045e-39	0.551626	0.5	0.319	1.7064e-35	1
Rpl5	1.72091e-39	0.425739	0.628	0.407	2.32977e-35	1
Reep3	1.74325e-39	0.532617	0.548	0.353	2.36001e-35	1
AU021092	1.8737e-39	0.634282	0.484	0.29	2.53661e-35	1
Romo1	2.29061e-39	0.616621	0.395	0.231	3.10103e-35	1
Mospd2	2.37218e-39	0.635104	0.359	0.193	3.21145e-35	1
H2-Q4	2.38937e-39	0.56544	0.446	0.257	3.23473e-35	1
Eef1b2	2.56299e-39	0.561972	0.472	0.29	3.46977e-35	1
Smim11	2.78188e-39	0.720868	0.324	0.175	3.76611e-35	1
H1f0	2.90496e-39	0.74525	0.332	0.176	3.93274e-35	1
Atp5l	4.4633e-39	0.450372	0.597	0.393	6.04242e-35	1
Cfl1	5.31082e-39	0.507995	0.551	0.338	7.18979e-35	1
Timm10b	6.30636e-39	0.612147	0.34	0.186	8.53756e-35	1
Pttg1	7.52396e-39	0.585984	0.349	0.192	1.01859e-34	1
Polr2e	8.19073e-39	0.594391	0.351	0.192	1.10886e-34	1
Arf5	1.41372e-38	0.547119	0.471	0.291	1.91389e-34	1
Eif5a	2.34094e-38	0.5161	0.438	0.264	3.16917e-34	1
Cnbp	2.89111e-38	0.502039	0.5	0.313	3.91398e-34	1
Rsrp1	2.94442e-38	0.41744	0.629	0.426	3.98615e-34	1
Ostf1	3.44976e-38	0.553589	0.494	0.313	4.67028e-34	1
Nfe2l1	3.67943e-38	0.621613	0.371	0.21	4.98122e-34	1
Tspan9	4.35104e-38	0.437484	0.589	0.386	5.89044e-34	1
Eva1b	6.64293e-38	0.515712	0.468	0.276	8.9932e-34	1
Irx3	7.41112e-38	0.669914	0.315	0.162	1.00332e-33	1
D5Ertd615e	7.59807e-38	0.909163	0.319	0.166	1.02863e-33	1
Fli1	8.90949e-38	0.513063	0.583	0.383	1.20617e-33	1
Stom	9.342e-38	0.641056	0.273	0.132	1.26472e-33	1
Psenen	2.67208e-37	0.584114	0.369	0.212	3.61746e-33	1
Tjp1	4.65661e-37	0.513466	0.529	0.34	6.30412e-33	1
Marcks	6.16032e-37	0.469109	0.477	0.278	8.33984e-33	1
Phlpp1	9.01412e-37	0.608284	0.536	0.349	1.22033e-32	1
Lama4	1.17007e-36	0.739648	0.316	0.168	1.58404e-32	1
Hnrnpa3	2.25284e-36	0.494216	0.5	0.318	3.04989e-32	1
Thrsp	3.02856e-36	0.75672	0.303	0.159	4.10006e-32	1
Zfp366	6.99592e-36	0.666952	0.352	0.199	9.47108e-32	1
Rpl4	1.12174e-35	0.482947	0.512	0.323	1.51861e-31	1
Mif	1.16949e-35	0.570351	0.319	0.171	1.58326e-31	1
Actn4	1.39573e-35	0.43367	0.599	0.407	1.88954e-31	1
Ndufc2	1.51146e-35	0.548125	0.424	0.261	2.04621e-31	1
Fam43a	2.08051e-35	0.673665	0.314	0.17	2.8166e-31	1
Ptges3	2.9975e-35	0.528847	0.432	0.267	4.05802e-31	1
Hnrnpf	3.28139e-35	0.484325	0.451	0.279	4.44235e-31	1
Cox6a1	3.609e-35	0.481745	0.51	0.332	4.88587e-31	1
Ssr4	3.61185e-35	0.543037	0.356	0.206	4.88973e-31	1
Rassf9	4.01901e-35	0.679566	0.289	0.147	5.44093e-31	1
Jam2	4.75798e-35	0.532636	0.335	0.181	6.44136e-31	1
Gabarap	5.44633e-35	0.423408	0.527	0.34	7.37325e-31	1
Irf7	1.13505e-34	0.705296	0.292	0.152	1.53663e-30	1
Tpm3	1.4221e-34	0.456596	0.524	0.344	1.92523e-30	1
Hypk	1.99316e-34	0.564713	0.367	0.217	2.69834e-30	1
Ran	2.56978e-34	0.593409	0.346	0.2	3.47896e-30	1
Btf3	2.71753e-34	0.42924	0.508	0.316	3.67899e-30	1
Ltbp1	3.35818e-34	0.670913	0.421	0.26	4.5463e-30	1
Adarb1	4.52791e-34	0.673855	0.291	0.151	6.12988e-30	1
Ccnd2	6.29262e-34	0.548937	0.395	0.229	8.51894e-30	1
Klf13	8.6828e-34	0.551116	0.465	0.301	1.17548e-29	1
Icam2	8.8169e-34	0.477973	0.488	0.303	1.19363e-29	1
Uaca	9.4995e-34	0.533641	0.355	0.201	1.28604e-29	1
Ywhaz	1.07709e-33	0.451217	0.524	0.35	1.45816e-29	1
Ppm1e	1.3151e-33	0.643941	0.252	0.122	1.78038e-29	1
Psmb3	1.55976e-33	0.541257	0.429	0.274	2.1116e-29	1
Pdap1	1.67419e-33	0.63109	0.328	0.186	2.26652e-29	1
Thbd	2.83332e-33	0.584146	0.396	0.23	3.83575e-29	1
Cox4i1	2.93323e-33	0.352579	0.732	0.5	3.97101e-29	1
Akt3	3.95505e-33	0.631234	0.429	0.272	5.35435e-29	1
Hsbp1	4.11648e-33	0.559642	0.355	0.208	5.57289e-29	1
Shisa5	4.13597e-33	0.554667	0.39	0.24	5.59928e-29	1
Psma3	4.20166e-33	0.534821	0.448	0.293	5.68821e-29	1
Cdc42ep1	4.39595e-33	0.677836	0.318	0.179	5.95124e-29	1
Ifnar1	4.84274e-33	0.576788	0.311	0.169	6.5561e-29	1
Tceal9	5.96531e-33	0.608802	0.337	0.193	8.07584e-29	1
Meox1	6.38677e-33	0.645569	0.325	0.181	8.6464e-29	1
Hspa5	6.93959e-33	0.480522	0.498	0.327	9.39481e-29	1
Slc43a3	9.44894e-33	0.60921	0.382	0.229	1.2792e-28	1
Tprgl	1.09368e-32	0.551161	0.375	0.228	1.48062e-28	1
Serpinh1	1.9239e-32	0.552565	0.41	0.257	2.60458e-28	1
Arhgef15	1.93878e-32	0.573052	0.388	0.239	2.62472e-28	1
Sema3g	2.42994e-32	0.541194	0.338	0.186	3.28966e-28	1
Fyn	2.48894e-32	0.56104	0.401	0.25	3.36952e-28	1
Eef2	3.35099e-32	0.383009	0.604	0.415	4.53657e-28	1
Gnb2	4.28355e-32	0.420885	0.511	0.329	5.79907e-28	1
Mcf2l	5.95278e-32	0.5378	0.29	0.154	8.05887e-28	1
B3gnt2	1.08507e-31	0.467567	0.429	0.268	1.46897e-27	1
Filip1l	1.09173e-31	0.658033	0.321	0.182	1.47798e-27	1
Pfn1	1.10535e-31	0.407327	0.542	0.355	1.49642e-27	1
Spcs2	1.15359e-31	0.517645	0.361	0.217	1.56174e-27	1
Ubxn1	1.2721e-31	0.490613	0.38	0.235	1.72217e-27	1
Tuba1b	1.28365e-31	0.527391	0.388	0.236	1.7378e-27	1
Gpx4	1.56459e-31	0.3195	0.697	0.476	2.11814e-27	1
Psmb5	1.61535e-31	0.551159	0.351	0.211	2.18686e-27	1
Tmco1	1.64654e-31	0.56758	0.349	0.206	2.22908e-27	1
Pdcd5	1.66861e-31	0.542668	0.321	0.183	2.25896e-27	1
Hspe1	1.84535e-31	0.494199	0.334	0.192	2.49824e-27	1
Sf3b6	2.0523e-31	0.552929	0.318	0.182	2.7784e-27	1
Shank3	2.27408e-31	0.572592	0.386	0.234	3.07865e-27	1
Ndufa5	2.52058e-31	0.508896	0.38	0.233	3.41236e-27	1
Gbp7	2.77911e-31	0.707884	0.319	0.18	3.76236e-27	1
St13	3.99854e-31	0.53137	0.447	0.292	5.41322e-27	1
H2-Q7	5.087e-31	0.490778	0.433	0.267	6.88678e-27	1
Rab8b	6.03156e-31	0.611104	0.272	0.144	8.16552e-27	1
Sdcbp	1.14152e-30	0.534852	0.34	0.202	1.5454e-26	1
Mier1	1.17788e-30	0.50414	0.406	0.254	1.59462e-26	1
Nol7	1.21486e-30	0.617243	0.336	0.196	1.64468e-26	1
Pltp	1.46366e-30	0.689076	0.291	0.157	1.9815e-26	1
Rcsd1	1.53525e-30	0.573054	0.308	0.171	2.07842e-26	1
Trir	1.60761e-30	0.45821	0.443	0.287	2.17638e-26	1
Psmb10	1.62071e-30	0.486933	0.389	0.234	2.19412e-26	1
Plekho1	4.35613e-30	0.592492	0.332	0.196	5.89733e-26	1
Fzd4	4.43626e-30	0.589226	0.325	0.189	6.0058e-26	1
Actg1	4.61901e-30	0.302833	0.652	0.426	6.25322e-26	1
Ptprg	5.23763e-30	0.443668	0.828	0.61	7.0907e-26	1
Atxn7l3b	6.01969e-30	0.577475	0.381	0.24	8.14946e-26	1
Arap3	6.39601e-30	0.547197	0.362	0.22	8.65892e-26	1
Tmed9	7.57486e-30	0.526799	0.394	0.254	1.02548e-25	1
Imp3	7.76618e-30	0.564204	0.286	0.159	1.05139e-25	1
Srsf3	1.02382e-29	0.383751	0.502	0.332	1.38605e-25	1
Ywhah	1.12139e-29	0.605706	0.34	0.204	1.51813e-25	1
Sec61b	1.34493e-29	0.552283	0.342	0.208	1.82076e-25	1
Ndufs5	1.37944e-29	0.566063	0.266	0.143	1.86749e-25	1
Tm9sf3	1.41895e-29	0.478488	0.424	0.274	1.92097e-25	1
Pls3	1.68276e-29	0.489296	0.39	0.242	2.27812e-25	1
Tma7	2.0229e-29	0.537589	0.373	0.234	2.7386e-25	1
Plscr1	4.84171e-29	0.46534	0.403	0.251	6.55471e-25	1
Rasip1	7.0019e-29	0.565968	0.38	0.241	9.47917e-25	1
Ndufa6	7.20214e-29	0.481754	0.401	0.258	9.75026e-25	1
Pdgfd	1.02562e-28	0.546563	0.47	0.309	1.38848e-24	1
Mcl1	1.25599e-28	0.458611	0.396	0.25	1.70036e-24	1
Rpl13a	1.28152e-28	0.347918	0.804	0.581	1.73493e-24	1
Rras	1.33328e-28	0.549923	0.389	0.247	1.805e-24	1
Ndufb3	2.48979e-28	0.508233	0.349	0.213	3.37068e-24	1
Samd9l	2.65595e-28	0.510507	0.337	0.2	3.59563e-24	1
Rhoj	3.61369e-28	0.522805	0.38	0.238	4.89221e-24	1
Fermt2	6.90755e-28	0.360321	0.559	0.391	9.35145e-24	1
Eef1d	9.68396e-28	0.414078	0.423	0.277	1.31101e-23	1
Bax	9.99385e-28	0.513269	0.343	0.211	1.35297e-23	1
Eogt	1.137e-27	0.508004	0.313	0.184	1.53927e-23	1
Arpc2	1.14914e-27	0.392792	0.54	0.366	1.55571e-23	1
Sypl	1.1722e-27	0.446225	0.436	0.286	1.58693e-23	1
Naa38	1.36603e-27	0.596191	0.267	0.149	1.84933e-23	1
Ier3ip1	1.62918e-27	0.54607	0.335	0.205	2.20558e-23	1
Dnajc8	2.0869e-27	0.504648	0.337	0.206	2.82525e-23	1
Arl6ip5	2.40359e-27	0.500211	0.321	0.193	3.25398e-23	1
Pop5	3.08046e-27	0.489329	0.284	0.161	4.17032e-23	1
Fis1	3.312e-27	0.380205	0.419	0.273	4.48378e-23	1
Ralbp1	3.86193e-27	0.444009	0.374	0.234	5.22828e-23	1
Lamtor2	3.91131e-27	0.544452	0.298	0.175	5.29513e-23	1
Cbx1	4.49189e-27	0.480396	0.316	0.189	6.08112e-23	1
Prex2	7.23865e-27	0.442706	0.563	0.391	9.79969e-23	1
Dek	9.07054e-27	0.477388	0.349	0.216	1.22797e-22	1
Npc2	1.02188e-26	0.498331	0.365	0.234	1.38342e-22	1
Klf3	1.27957e-26	0.47486	0.45	0.302	1.73228e-22	1
Tmem140	1.40157e-26	0.503836	0.352	0.219	1.89744e-22	1
Anxa3	1.45392e-26	0.461707	0.442	0.288	1.96831e-22	1
Tbca	1.7444e-26	0.471924	0.372	0.237	2.36157e-22	1
Pdcd10	1.81857e-26	0.545584	0.326	0.202	2.46199e-22	1
Gimap5	2.19656e-26	0.464019	0.348	0.211	2.9737e-22	1
Cetn3	2.50623e-26	0.529458	0.321	0.196	3.39293e-22	1
Gimap1	3.53569e-26	0.441726	0.404	0.259	4.78662e-22	1
Sbds	3.80128e-26	0.55755	0.292	0.172	5.14617e-22	1
Dab2ip	4.45845e-26	0.470048	0.358	0.226	6.03584e-22	1
Fam171a1	4.47012e-26	0.467029	0.42	0.278	6.05164e-22	1
Asap1	4.69444e-26	0.327486	0.619	0.432	6.35534e-22	1
Aldoa	4.81862e-26	0.425006	0.484	0.331	6.52345e-22	1
Bnip3l	5.03608e-26	0.519529	0.399	0.263	6.81785e-22	1
Parp14	5.17999e-26	0.546244	0.328	0.199	7.01267e-22	1
9930111J21Rik2	6.43691e-26	0.617848	0.266	0.151	8.71429e-22	1
Psmb2	8.48478e-26	0.420409	0.372	0.238	1.14867e-21	1
Rhoc	8.85007e-26	0.435305	0.386	0.246	1.19812e-21	1
Ndufa3	1.15045e-25	0.3922	0.381	0.246	1.55748e-21	1
Ehd2	1.21148e-25	0.545238	0.303	0.181	1.64011e-21	1
Rab2a	1.2496e-25	0.361329	0.54	0.382	1.6917e-21	1
Eif3f	1.27199e-25	0.434911	0.362	0.229	1.72202e-21	1
Iigp1	1.4313e-25	0.561175	0.284	0.158	1.9377e-21	1
Pnrc1	1.45073e-25	0.530528	0.317	0.196	1.964e-21	1
Bri3	1.56338e-25	0.430846	0.424	0.287	2.1165e-21	1
Rnf7	1.63949e-25	0.532605	0.322	0.201	2.21955e-21	1
Cbx3	1.64831e-25	0.500467	0.268	0.151	2.23148e-21	1
Hif1a	1.93674e-25	0.50771	0.271	0.152	2.62196e-21	1
Eif1b	2.58596e-25	0.515368	0.275	0.159	3.50087e-21	1
Mrps33	2.59225e-25	0.512872	0.297	0.177	3.50939e-21	1
Ltbp4	2.95411e-25	0.435407	0.426	0.275	3.99927e-21	1
Mpzl1	3.26089e-25	0.46019	0.329	0.2	4.41459e-21	1
Ttc28	3.39909e-25	0.445953	0.464	0.317	4.60169e-21	1
Psmb6	3.52615e-25	0.499458	0.358	0.232	4.77371e-21	1
Chmp3	4.04671e-25	0.465882	0.339	0.213	5.47844e-21	1
Eif3c	4.05092e-25	0.397226	0.388	0.25	5.48414e-21	1
Nrp2	4.33589e-25	0.52345	0.348	0.212	5.86993e-21	1
Ncl	6.06211e-25	0.437818	0.395	0.256	8.20689e-21	1
Pak2	8.24015e-25	0.405476	0.456	0.313	1.11555e-20	1
Slc50a1	1.4385e-24	0.543623	0.346	0.219	1.94744e-20	1
Tmtc1	1.4897e-24	0.489909	0.348	0.218	2.01676e-20	1
Hras	2.44163e-24	0.486263	0.332	0.212	3.30548e-20	1
Uqcr11	2.58158e-24	0.27949	0.54	0.383	3.49494e-20	1
Cav1	2.85115e-24	0.516311	0.313	0.192	3.85988e-20	1
Actr2	2.85283e-24	0.453588	0.353	0.225	3.86216e-20	1
Cwc15	3.20576e-24	0.493621	0.293	0.177	4.33996e-20	1
Lifr	3.40359e-24	0.461901	0.393	0.256	4.60779e-20	1
Calr	3.44411e-24	0.378695	0.459	0.311	4.66263e-20	1
Ndufa8	3.47993e-24	0.473411	0.357	0.234	4.71113e-20	1
Atp5k	4.92265e-24	0.273869	0.5	0.349	6.66428e-20	1
Elf2	5.11848e-24	0.44941	0.36	0.233	6.92939e-20	1
Bloc1s1	5.47009e-24	0.458257	0.354	0.228	7.40541e-20	1
Ptp4a3	6.47795e-24	0.504717	0.26	0.147	8.76985e-20	1
Tap2	6.93309e-24	0.517582	0.297	0.18	9.38602e-20	1
Sec62	7.43453e-24	0.307509	0.572	0.413	1.00649e-19	1
Tm9sf2	8.68199e-24	0.445633	0.341	0.22	1.17537e-19	1
Ctsl	9.13319e-24	0.395872	0.455	0.308	1.23645e-19	1
Klhl24	1.01211e-23	0.460792	0.34	0.216	1.37019e-19	1
Tmem30a	1.01217e-23	0.360674	0.456	0.315	1.37028e-19	1
Hist1h2bc	1.02558e-23	0.604854	0.258	0.146	1.38843e-19	1
Mrfap1	1.16534e-23	0.453547	0.372	0.244	1.57763e-19	1
Tmed10	1.22702e-23	0.404282	0.427	0.289	1.66115e-19	1
Pura	1.41695e-23	0.448668	0.403	0.272	1.91827e-19	1
F11r	1.6296e-23	0.391156	0.471	0.331	2.20615e-19	1
Pea15a	1.76412e-23	0.49201	0.324	0.203	2.38827e-19	1
Mrps24	1.77339e-23	0.444449	0.307	0.189	2.40082e-19	1
Zeb1	1.84779e-23	0.425741	0.487	0.343	2.50154e-19	1
Sh3bgrl	1.89612e-23	0.455335	0.33	0.207	2.56696e-19	1
Palmd	1.9141e-23	0.5174	0.285	0.17	2.59132e-19	1
Klf9	2.07919e-23	0.415019	0.42	0.282	2.8148e-19	1
Ecscr	2.65158e-23	0.457705	0.373	0.243	3.5897e-19	1
Qk	2.93877e-23	0.309829	0.604	0.429	3.9785e-19	1
Arpc5	3.74466e-23	0.522105	0.368	0.249	5.06952e-19	1
Nucks1	3.77745e-23	0.41082	0.388	0.259	5.11391e-19	1
Slfn2	4.43571e-23	0.595302	0.287	0.172	6.00506e-19	1
Ier5	4.92995e-23	0.505665	0.34	0.217	6.67417e-19	1
Csnk2a1	5.95707e-23	0.382861	0.416	0.286	8.06468e-19	1
Herc6	6.75299e-23	0.521135	0.26	0.148	9.14219e-19	1
Plxnd1	7.23581e-23	0.451491	0.366	0.239	9.79584e-19	1
Cggbp1	8.41841e-23	0.514612	0.293	0.18	1.13968e-18	1
Nck1	1.21868e-22	0.435701	0.372	0.246	1.64985e-18	1
Polr1d	1.43176e-22	0.422698	0.342	0.224	1.93831e-18	1
Trim47	1.68325e-22	0.534436	0.302	0.19	2.27878e-18	1
Trim37	2.03407e-22	0.404873	0.315	0.197	2.75372e-18	1
Rexo2	2.08443e-22	0.419529	0.298	0.182	2.8219e-18	1
Snrpd2	2.32692e-22	0.4684	0.314	0.201	3.15018e-18	1
Afap1l1	2.48707e-22	0.379361	0.321	0.2	3.36699e-18	1
Set	2.68935e-22	0.466616	0.349	0.231	3.64084e-18	1
Cds2	2.69167e-22	0.45162	0.334	0.215	3.64398e-18	1
Ramp3	3.09065e-22	0.410217	0.362	0.224	4.18412e-18	1
Sugt1	3.10098e-22	0.400374	0.32	0.201	4.1981e-18	1
Eid1	3.18139e-22	0.498674	0.286	0.177	4.30696e-18	1
Adgrl2	3.64887e-22	0.364209	0.508	0.356	4.93983e-18	1
Cfdp1	3.7296e-22	0.374246	0.387	0.259	5.04913e-18	1
Arpp19	3.73406e-22	0.290674	0.433	0.302	5.05517e-18	1
Dlc1	4.50511e-22	0.272002	0.645	0.456	6.09902e-18	1
AU020206	4.64989e-22	0.551311	0.282	0.169	6.29502e-18	1
Mrps21	4.89316e-22	0.380329	0.342	0.224	6.62436e-18	1
Swi5	6.15397e-22	0.434593	0.333	0.217	8.33125e-18	1
Spcs1	6.75433e-22	0.439927	0.295	0.183	9.14401e-18	1
Itm2c	7.3466e-22	0.550983	0.272	0.165	9.94583e-18	1
She	7.65495e-22	0.506808	0.295	0.185	1.03633e-17	1
Eif2s2	7.83582e-22	0.398938	0.415	0.286	1.06081e-17	1
Prdx2	8.58976e-22	0.486521	0.341	0.225	1.16288e-17	1
Cox5a	8.74299e-22	0.406847	0.395	0.272	1.18363e-17	1
Dnajb6	8.79054e-22	0.377844	0.341	0.221	1.19006e-17	1
Elf1	8.8697e-22	0.351479	0.498	0.358	1.20078e-17	1
Rapgef2	9.14252e-22	0.316759	0.572	0.415	1.23771e-17	1
Slc3a2	1.02503e-21	0.486617	0.322	0.207	1.38768e-17	1
Zfand5	1.52404e-21	0.448702	0.376	0.256	2.06324e-17	1
Hnrnpab	1.61169e-21	0.491562	0.301	0.191	2.1819e-17	1
Tapbp	1.70173e-21	0.336041	0.397	0.264	2.30381e-17	1
Cldn15	1.89207e-21	0.499211	0.292	0.181	2.56149e-17	1
Itprid2	1.90467e-21	0.438941	0.303	0.188	2.57854e-17	1
Adgre5	2.14693e-21	0.396086	0.377	0.249	2.90651e-17	1
D8Ertd738e	2.14833e-21	0.342689	0.431	0.3	2.90842e-17	1
Atp5mpl	2.2835e-21	0.365978	0.324	0.207	3.0914e-17	1
Dynlrb1	3.36703e-21	0.419805	0.324	0.21	4.55828e-17	1
9530026P05Rik	3.40584e-21	0.439182	0.527	0.393	4.61083e-17	1
Nxpe4	3.46903e-21	0.534721	0.268	0.161	4.69637e-17	1
Paip2	3.66784e-21	0.347252	0.374	0.249	4.96553e-17	1
Jund	3.85885e-21	0.376072	0.399	0.264	5.22412e-17	1
Nbeal1	4.03643e-21	0.34419	0.458	0.322	5.46452e-17	1
Srsf7	4.84732e-21	0.399485	0.355	0.236	6.5623e-17	1
Smarca5	5.19369e-21	0.520222	0.277	0.169	7.03122e-17	1
Ssb	5.32821e-21	0.402146	0.377	0.256	7.21333e-17	1
Eif5	5.71701e-21	0.368881	0.409	0.281	7.73968e-17	1
Abhd17a	6.17517e-21	0.472524	0.277	0.172	8.35995e-17	1
Piezo2	8.08189e-21	0.539932	0.296	0.184	1.09413e-16	1
Smad1	8.8522e-21	0.443948	0.269	0.162	1.19841e-16	1
Rtn4	9.64272e-21	0.356951	0.405	0.279	1.30543e-16	1
Irf2	1.24013e-20	0.364116	0.436	0.308	1.67889e-16	1
Rpsa	1.31547e-20	0.258502	0.816	0.619	1.78089e-16	1
Tmed2	1.44189e-20	0.434607	0.339	0.227	1.95203e-16	1
Rtl8a	1.50187e-20	0.554861	0.26	0.156	2.03323e-16	1
Drap1	1.71382e-20	0.408522	0.305	0.195	2.32017e-16	1
1110004F10Rik	1.73836e-20	0.424903	0.268	0.164	2.3534e-16	1
Nudc	1.95242e-20	0.438195	0.278	0.174	2.64318e-16	1
Bcam	2.19244e-20	0.354226	0.416	0.288	2.96812e-16	1
Mapre1	2.68388e-20	0.436936	0.302	0.195	3.63343e-16	1
Lgals3bp	2.94559e-20	0.492399	0.258	0.155	3.98774e-16	1
Med28	3.26793e-20	0.460518	0.315	0.209	4.42412e-16	1
Pcbp1	3.32799e-20	0.415297	0.322	0.211	4.50543e-16	1
Hdac7	3.88402e-20	0.372172	0.361	0.241	5.25818e-16	1
Adam10	4.14472e-20	0.373806	0.413	0.291	5.61113e-16	1
Efna1	4.23195e-20	0.428891	0.324	0.213	5.72921e-16	1
Pcbp2	5.38761e-20	0.328284	0.46	0.331	7.29374e-16	1
Mfge8	7.70346e-20	0.334191	0.407	0.282	1.04289e-15	1
Nfe2l2	9.27886e-20	0.343733	0.388	0.269	1.25617e-15	1
Ctnna1	9.90406e-20	0.252268	0.553	0.414	1.34081e-15	1
Inpp4b	1.35585e-19	0.443601	0.4	0.272	1.83554e-15	1
Dpysl2	1.38218e-19	0.430595	0.323	0.214	1.8712e-15	1
Sh3bp5	1.77096e-19	0.375528	0.442	0.312	2.39752e-15	1
Lman1	2.39538e-19	0.43242	0.302	0.197	3.24287e-15	1
Nmt1	2.49009e-19	0.342761	0.34	0.224	3.37108e-15	1
Cav2	2.4944e-19	0.478797	0.315	0.211	3.37692e-15	1
Sumo1	2.79242e-19	0.393332	0.332	0.221	3.78038e-15	1
Hnrnpc	2.92889e-19	0.341673	0.378	0.258	3.96513e-15	1
Sfr1	3.27205e-19	0.464973	0.279	0.178	4.4297e-15	1
Ywhaq	3.38572e-19	0.327088	0.421	0.295	4.58359e-15	1
Stard9	3.93338e-19	0.480625	0.281	0.177	5.32501e-15	1
Srp9	4.02874e-19	0.416738	0.261	0.163	5.45411e-15	1
Mxd4	4.67922e-19	0.28588	0.468	0.332	6.33472e-15	1
Sap18	5.6364e-19	0.477083	0.285	0.186	7.63056e-15	1
Dstn	6.01994e-19	0.348404	0.394	0.274	8.14979e-15	1
Pik3r3	6.51109e-19	0.456001	0.33	0.217	8.81472e-15	1
Atp6v1e1	7.79719e-19	0.291507	0.379	0.26	1.05558e-14	1
Sec14l1	8.03807e-19	0.39687	0.294	0.189	1.08819e-14	1
Rwdd1	8.56592e-19	0.44429	0.285	0.185	1.15965e-14	1
Pdia3	9.31935e-19	0.284405	0.455	0.326	1.26165e-14	1
Ndufc1	1.00464e-18	0.426998	0.358	0.252	1.36008e-14	1
Fxyd5	1.02089e-18	0.369158	0.35	0.235	1.38209e-14	1
Rbm8a	1.07262e-18	0.418427	0.305	0.202	1.45212e-14	1
Bnip2	1.07539e-18	0.378531	0.362	0.249	1.45586e-14	1
Tmed5	1.29192e-18	0.459364	0.276	0.173	1.749e-14	1
Grasp	1.35521e-18	0.480776	0.26	0.164	1.83468e-14	1
Tspan12	1.6539e-18	0.428661	0.347	0.236	2.23906e-14	1
Ddx6	1.67175e-18	0.266139	0.442	0.314	2.26321e-14	1
Cpne8	1.82723e-18	0.378018	0.324	0.215	2.4737e-14	1
Bzw1	1.98939e-18	0.422204	0.285	0.187	2.69324e-14	1
Acer2	2.28457e-18	0.478026	0.283	0.181	3.09284e-14	1
Emc7	2.51904e-18	0.441138	0.308	0.208	3.41028e-14	1
Rgs3	2.59307e-18	0.391183	0.3	0.194	3.5105e-14	1
Scand1	2.8342e-18	0.401667	0.361	0.254	3.83694e-14	1
Ktn1	2.87197e-18	0.265214	0.434	0.309	3.88807e-14	1
Serinc1	3.10933e-18	0.399311	0.343	0.235	4.20941e-14	1
Rheb	3.43661e-18	0.379808	0.361	0.254	4.65249e-14	1
Purb	4.11791e-18	0.364063	0.37	0.258	5.57483e-14	1
Tagln2	5.04538e-18	0.309078	0.416	0.291	6.83044e-14	1
Hnrnph3	6.11592e-18	0.280519	0.324	0.216	8.27973e-14	1
Rnf213	7.8017e-18	0.409664	0.316	0.21	1.05619e-13	1
Chmp5	8.15401e-18	0.387553	0.301	0.2	1.10389e-13	1
Epn2	8.53489e-18	0.325029	0.343	0.233	1.15545e-13	1
Nop10	8.57311e-18	0.452889	0.262	0.168	1.16063e-13	1
Psmb4	9.14111e-18	0.380558	0.323	0.219	1.23752e-13	1
Coa3	9.62198e-18	0.409183	0.26	0.165	1.30262e-13	1
Rab11a	9.92096e-18	0.402294	0.354	0.248	1.3431e-13	1
Ccdc12	1.05106e-17	0.34035	0.35	0.245	1.42293e-13	1
Mrpl52	1.08851e-17	0.386835	0.297	0.195	1.47362e-13	1
Tmpo	1.12991e-17	0.365051	0.267	0.169	1.52967e-13	1
Sema6a	1.72085e-17	0.334904	0.423	0.299	2.32969e-13	1
Anp32b	1.80961e-17	0.404966	0.282	0.185	2.44986e-13	1
Ripor1	1.81989e-17	0.37434	0.266	0.169	2.46376e-13	1
Cnn3	1.85424e-17	0.356594	0.382	0.271	2.51026e-13	1
Tmem160	1.94963e-17	0.458276	0.283	0.188	2.63941e-13	1
U2af1	2.15712e-17	0.253116	0.328	0.22	2.92031e-13	1
Nuak1	2.20022e-17	0.503572	0.273	0.175	2.97865e-13	1
Mapk3	2.68402e-17	0.459331	0.327	0.228	3.63363e-13	1
Sipa1l2	3.26896e-17	0.454035	0.275	0.179	4.42552e-13	1
Myo1c	3.65236e-17	0.396873	0.387	0.275	4.94457e-13	1
Polr2f	4.02825e-17	0.433409	0.267	0.175	5.45344e-13	1
Fkbp3	4.362e-17	0.395626	0.252	0.159	5.90527e-13	1
Metap2	4.82536e-17	0.356095	0.338	0.234	6.53257e-13	1
Atp5g3	5.19111e-17	0.311279	0.335	0.232	7.02773e-13	1
Eif3e	6.8254e-17	0.370251	0.279	0.184	9.24023e-13	1
Map4k4	7.55489e-17	0.337645	0.385	0.276	1.02278e-12	1
Ndufb7	8.27194e-17	0.298667	0.42	0.309	1.11986e-12	1
Ppp1ca	9.57488e-17	0.314154	0.417	0.309	1.29625e-12	1
Ptk2	9.7492e-17	0.251835	0.518	0.39	1.31985e-12	1
Eny2	1.0488e-16	0.385219	0.253	0.16	1.41987e-12	1
Utrn	1.13541e-16	0.327358	0.573	0.439	1.53712e-12	1
Pebp1	1.27182e-16	0.388113	0.325	0.229	1.72178e-12	1
Cltb	1.35938e-16	0.341245	0.288	0.191	1.84033e-12	1
Ctsz	1.5022e-16	0.344977	0.331	0.229	2.03368e-12	1
Txndc17	1.90198e-16	0.396964	0.309	0.213	2.5749e-12	1
Vamp8	2.25065e-16	0.281829	0.341	0.235	3.04693e-12	1
Ndufa2	2.43182e-16	0.254799	0.448	0.334	3.29219e-12	1
Capza2	2.51097e-16	0.35757	0.332	0.232	3.39935e-12	1
Stard8	2.75625e-16	0.355716	0.328	0.228	3.73141e-12	1
Saraf	3.30591e-16	0.351932	0.315	0.215	4.47554e-12	1
Pfdn1	4.16769e-16	0.355137	0.299	0.202	5.64222e-12	1
Nav1	4.85005e-16	0.285208	0.391	0.275	6.56599e-12	1
Tnfrsf1a	5.32866e-16	0.420389	0.294	0.201	7.21394e-12	1
Tax1bp1	5.51669e-16	0.269461	0.395	0.284	7.46849e-12	1
Lamp1	7.01108e-16	0.276911	0.504	0.381	9.4916e-12	1
Map7d1	7.19684e-16	0.434812	0.261	0.173	9.74308e-12	1
Pdia6	7.46204e-16	0.339955	0.328	0.228	1.01021e-11	1
Sppl2a	8.60442e-16	0.44858	0.326	0.229	1.16487e-11	1
Ephb4	9.92368e-16	0.43723	0.292	0.201	1.34347e-11	1
Lamb2	1.10278e-15	0.340469	0.286	0.193	1.49295e-11	1
Smad7	1.23557e-15	0.365364	0.373	0.268	1.67272e-11	1
Iqgap1	1.55151e-15	0.254839	0.444	0.327	2.10043e-11	1
Col4a2	1.63873e-15	0.27639	0.525	0.399	2.21851e-11	1
Sav1	1.79063e-15	0.368735	0.263	0.174	2.42415e-11	1
Pcnx	1.96797e-15	0.310034	0.318	0.22	2.66424e-11	1
Snu13	2.05438e-15	0.456302	0.26	0.174	2.78122e-11	1
Skp1a	2.28951e-15	0.302876	0.274	0.181	3.09954e-11	1
Ndufb8	2.67182e-15	0.36603	0.348	0.255	3.61712e-11	1
Ldha	2.69238e-15	0.287019	0.392	0.285	3.64494e-11	1
Eloc	3.44589e-15	0.361729	0.271	0.184	4.66505e-11	1
Rnaset2b	3.94883e-15	0.409901	0.261	0.176	5.34592e-11	1
Brd9	4.08239e-15	0.324973	0.25	0.161	5.52674e-11	1
Sri	4.42166e-15	0.307629	0.331	0.234	5.98605e-11	1
Brd2	4.75201e-15	0.278645	0.343	0.241	6.43327e-11	1
Rab18	5.17849e-15	0.364326	0.276	0.189	7.01064e-11	1
Ccny	5.34166e-15	0.275547	0.388	0.284	7.23154e-11	1
Wasl	6.11119e-15	0.271848	0.313	0.215	8.27333e-11	1
Rnaset2a	6.2036e-15	0.356151	0.295	0.206	8.39844e-11	1
Arpc4	6.28112e-15	0.28431	0.344	0.247	8.50337e-11	1
Cdc37	6.32899e-15	0.34908	0.3	0.209	8.56819e-11	1
Vezf1	7.81484e-15	0.42858	0.274	0.188	1.05797e-10	1
Tcea1	7.99072e-15	0.334472	0.334	0.238	1.08178e-10	1
Asap2	8.98908e-15	0.30014	0.371	0.266	1.21694e-10	1
Fas	1.13935e-14	0.383058	0.275	0.185	1.54245e-10	1
Dennd6a	1.16533e-14	0.314711	0.313	0.219	1.57762e-10	1
Klf4	1.28577e-14	0.43815	0.29	0.193	1.74068e-10	1
Tuba1a	1.378e-14	0.336329	0.289	0.196	1.86554e-10	1
Sdf4	1.61619e-14	0.303105	0.303	0.211	2.188e-10	1
Tor1aip1	1.67168e-14	0.279417	0.34	0.242	2.26312e-10	1
Psma5	1.78795e-14	0.402334	0.26	0.179	2.42053e-10	1
Wwtr1	2.45529e-14	0.280014	0.424	0.321	3.32397e-10	1
Ddx3x	3.09923e-14	0.274742	0.306	0.213	4.19573e-10	1
Smc1a	3.25558e-14	0.343318	0.335	0.241	4.40741e-10	1
Oaz2	3.34295e-14	0.37671	0.277	0.188	4.52568e-10	1
Cox7b	3.82753e-14	0.262378	0.332	0.237	5.18171e-10	1
Cox7a2l	3.94769e-14	0.301794	0.343	0.249	5.34439e-10	1
Smim10l1	4.91051e-14	0.364793	0.253	0.169	6.64784e-10	1
Mdh2	4.93761e-14	0.309068	0.301	0.213	6.68454e-10	1
Tln1	6.71937e-14	0.258367	0.403	0.305	9.09668e-10	1
Ptpn12	7.40116e-14	0.345072	0.328	0.237	1.00197e-09	1
Tmod3	7.52046e-14	0.272903	0.33	0.235	1.01812e-09	1
Dctn3	7.59721e-14	0.381658	0.263	0.182	1.02851e-09	1
Pkm	7.84685e-14	0.256465	0.329	0.235	1.06231e-09	1
Prkd1	8.25185e-14	0.330355	0.289	0.196	1.11714e-09	1
Ndufab1	1.12317e-13	0.338907	0.26	0.178	1.52055e-09	1
Ppp1r11	1.20595e-13	0.402645	0.276	0.192	1.63262e-09	1
Higd2a	1.32549e-13	0.394943	0.25	0.171	1.79445e-09	1
BC031181	1.49272e-13	0.298246	0.28	0.195	2.02084e-09	1
Snrnp27	1.68156e-13	0.418148	0.258	0.176	2.2765e-09	1
Hecw2	2.65393e-13	0.27442	0.345	0.245	3.59288e-09	1
Irf1	2.86161e-13	0.440892	0.25	0.172	3.87405e-09	1
Cope	3.1067e-13	0.287408	0.263	0.178	4.20585e-09	1
Zbtb46	3.2362e-13	0.324089	0.319	0.231	4.38117e-09	1
Mob4	3.55984e-13	0.320269	0.316	0.23	4.81931e-09	1
Gapdh	3.98688e-13	0.327633	0.39	0.295	5.39744e-09	1
Adam15	4.21145e-13	0.285625	0.299	0.209	5.70146e-09	1
Entpd1	4.77357e-13	0.378648	0.271	0.188	6.46246e-09	1
Ndufb5	5.30231e-13	0.261202	0.312	0.227	7.17827e-09	1
Col15a1	5.32144e-13	0.41259	0.264	0.178	7.20416e-09	1
Cops9	5.5582e-13	0.351	0.27	0.189	7.52469e-09	1
Tspan15	5.91053e-13	0.392233	0.278	0.196	8.00167e-09	1
Rab11b	7.67579e-13	0.313767	0.277	0.194	1.03915e-08	1
Nxn	9.19375e-13	0.334899	0.337	0.244	1.24465e-08	1
Slc25a4	1.01339e-12	0.324679	0.34	0.255	1.37192e-08	1
Lamc1	1.01402e-12	0.335943	0.288	0.204	1.37279e-08	1
Brk1	1.24906e-12	0.293224	0.319	0.234	1.69098e-08	1
2900026A02Rik	1.8193e-12	0.286928	0.284	0.202	2.46296e-08	1
Acvrl1	1.97126e-12	0.377114	0.304	0.223	2.66869e-08	1
Eif3k	2.38547e-12	0.284757	0.314	0.23	3.22945e-08	1
Mdfic	3.16587e-12	0.333763	0.282	0.199	4.28596e-08	1
Bcap31	3.29875e-12	0.333996	0.268	0.19	4.46584e-08	1
Tjp2	3.51477e-12	0.261627	0.251	0.168	4.7583e-08	1
Dnajc3	4.34451e-12	0.299221	0.357	0.269	5.88159e-08	1
Tpst2	4.37122e-12	0.352556	0.274	0.195	5.91776e-08	1
Tgoln1	5.29433e-12	0.284345	0.309	0.227	7.16746e-08	1
Atp8a1	7.13779e-12	0.289016	0.29	0.205	9.66315e-08	1
Tspan18	7.59778e-12	0.340018	0.292	0.21	1.02859e-07	1
Ddah2	8.28941e-12	0.313171	0.276	0.196	1.12222e-07	1
Tsn	8.66107e-12	0.322186	0.261	0.186	1.17254e-07	1
Fundc2	8.91127e-12	0.382388	0.253	0.18	1.20641e-07	1
Pttg1ip	1.05552e-11	0.275472	0.343	0.26	1.42897e-07	1
Sncg	1.52332e-11	0.30444	0.259	0.179	2.06228e-07	1
Manf	1.59244e-11	0.35409	0.254	0.182	2.15584e-07	1
Chmp4b	1.73743e-11	0.338939	0.261	0.188	2.35213e-07	1
Sf3b2	1.8881e-11	0.264683	0.316	0.235	2.55611e-07	1
St3gal1	2.03239e-11	0.281149	0.272	0.194	2.75145e-07	1
Dhx15	2.29296e-11	0.276712	0.268	0.189	3.10421e-07	1
Arpc1a	2.81451e-11	0.275631	0.26	0.186	3.81029e-07	1
Sptssa	3.54973e-11	0.345297	0.287	0.212	4.80562e-07	1
Ndufb2	3.57645e-11	0.296892	0.268	0.195	4.8418e-07	1
F8	4.02821e-11	0.368544	0.3	0.217	5.45339e-07	1
Pdcd6ip	4.17494e-11	0.287029	0.255	0.181	5.65204e-07	1
Tbxa2r	4.97184e-11	0.343627	0.265	0.188	6.73087e-07	1
Nudcd3	4.99313e-11	0.258613	0.337	0.254	6.7597e-07	1
Rex1bd	5.19376e-11	0.285286	0.257	0.185	7.03131e-07	1
Dazap2	5.19481e-11	0.340192	0.262	0.189	7.03274e-07	1
Pcmtd1	5.6048e-11	0.300143	0.316	0.238	7.58778e-07	1
1810026B05Rik	5.87779e-11	0.294864	0.257	0.184	7.95735e-07	1
Yy1	9.04254e-11	0.268677	0.294	0.218	1.22418e-06	1
Clec14a	9.40798e-11	0.349255	0.335	0.252	1.27365e-06	1
Slc44a1	1.05052e-10	0.291232	0.254	0.183	1.42219e-06	1
Slc25a5	1.44604e-10	0.284536	0.318	0.242	1.95765e-06	1
Swap70	1.61751e-10	0.341526	0.25	0.18	2.18978e-06	1
Top2b	2.04002e-10	0.269526	0.279	0.207	2.76178e-06	1
Slc44a2	3.73993e-10	0.286388	0.253	0.184	5.06312e-06	1
Cyp20a1	4.35968e-10	0.381974	0.26	0.192	5.90213e-06	1
Psmc3	8.87794e-10	0.257384	0.293	0.223	1.2019e-05	1
Eif3h	1.03183e-09	0.284422	0.293	0.222	1.3969e-05	1
Stox2	1.33053e-09	0.280537	0.435	0.339	1.80128e-05	1
Arap2	1.36662e-09	0.281882	0.296	0.221	1.85014e-05	1
Yes1	4.63751e-09	0.281457	0.266	0.197	6.27826e-05	1
Eif4h	9.73953e-09	0.263012	0.281	0.216	0.000131854	1
Rab6a	3.15168e-08	0.274416	0.252	0.192	0.000426674	1
Tmem256	3.85454e-08	0.257439	0.256	0.197	0.000521827	1
Cr1l	1.44544e-07	0.301047	0.252	0.196	0.00195684	1
Slc12a1	0	1.41495	0.852	0.242	0	2
Magi2	1.94435e-301	1.51505	0.956	0.423	2.63226e-297	2
Slc8a1	4.57133e-295	1.49917	0.87	0.318	6.18867e-291	2
Slc12a3	9.83174e-294	1.35225	0.813	0.222	1.33102e-289	2
Kap	5.24501e-288	1.45144	0.973	0.474	7.1007e-284	2
Pkhd1	5.73242e-279	1.32468	0.906	0.3	7.76055e-275	2
Erbb4	5.42897e-266	1.22011	0.722	0.17	7.34974e-262	2
Abcc2	1.91293e-264	1.35651	0.942	0.369	2.58973e-260	2
Egf	7.22067e-262	1.31438	0.587	0.109	9.77534e-258	2
Ank3	1.26175e-260	1.24799	0.916	0.323	1.70816e-256	2
Esrrg	5.43484e-256	1.2285	0.961	0.405	7.35769e-252	2
Acsm2	5.20918e-253	1.19756	0.886	0.3	7.05219e-249	2
Pdzk1	1.75248e-247	1.10198	0.653	0.136	2.37251e-243	2
Keg1	1.08903e-243	1.09966	0.613	0.121	1.47433e-239	2
Lrp2	4.93233e-243	1.11759	0.84	0.249	6.67739e-239	2
Ghr	3.0906e-242	1.12423	0.956	0.5	4.18405e-238	2
Glis3	3.66515e-240	1.13008	0.836	0.245	4.96188e-236	2
Bicc1	6.95734e-238	1.10555	0.738	0.187	9.41884e-234	2
Slc47a1	2.25233e-236	1.07669	0.728	0.179	3.0492e-232	2
Fut9	1.51021e-234	1.08885	0.903	0.322	2.04453e-230	2
Rbm47	3.00617e-234	1.07867	0.689	0.161	4.06975e-230	2
Ptprd	5.46804e-234	1.08645	0.831	0.253	7.40264e-230	2
Plxdc2	1.3505e-232	1.11939	0.7	0.175	1.82831e-228	2
Slc25a21	3.24072e-232	1.02951	0.859	0.269	4.38729e-228	2
Cyp2j5	7.78988e-232	1.14926	0.732	0.192	1.05459e-227	2
Gm42397	2.14698e-231	1.09573	0.906	0.332	2.90658e-227	2
Slc4a4	4.11431e-231	1.12535	0.836	0.264	5.56995e-227	2
Slc27a2	7.73263e-230	1.10218	0.815	0.246	1.04684e-225	2
Fxyd2	1.24408e-229	1.09146	0.847	0.274	1.68424e-225	2
Rbms3	2.69339e-229	1.20956	0.551	0.11	3.64632e-225	2
Gramd1b	2.3981e-228	1.02153	0.7	0.176	3.24655e-224	2
Slc13a1	1.94974e-227	0.952747	0.696	0.167	2.63956e-223	2
Setbp1	1.11485e-222	1.11796	0.599	0.127	1.50928e-218	2
Cyp2j13	2.33491e-222	1.07222	0.654	0.154	3.161e-218	2
Neat1	3.00795e-221	1.11297	0.977	0.642	4.07216e-217	2
Trabd2b	2.05166e-220	0.952716	0.86	0.277	2.77753e-216	2
Slc34a1	2.80361e-220	1.06882	0.961	0.449	3.79552e-216	2
Cacnb4	1.65015e-219	1.0854	0.483	0.083	2.23397e-215	2
Arhgap24	2.23714e-219	1.0663	0.667	0.163	3.02864e-215	2
Abca13	4.48386e-219	1.18262	0.477	0.083	6.07025e-215	2
Wwc1	5.34697e-219	1.0138	0.612	0.134	7.23872e-215	2
Dach1	4.9789e-218	1.14084	0.647	0.163	6.74044e-214	2
Atp6v0a4	1.051e-216	1.059	0.559	0.113	1.42285e-212	2
Plcl1	2.88166e-215	1.16089	0.678	0.187	3.90119e-211	2
Shroom3	3.60323e-215	1.02784	0.606	0.137	4.87806e-211	2
Sugct	2.45696e-214	1.066	0.67	0.173	3.32623e-210	2
Atp1b1	8.38387e-214	1.05793	0.623	0.15	1.13501e-209	2
Nhs	3.22972e-213	0.971743	0.821	0.274	4.3724e-209	2
Gpx3	5.69512e-212	1.11762	0.996	0.753	7.71005e-208	2
Ppara	9.52577e-212	1.07857	0.754	0.218	1.2896e-207	2
Aspa	1.79113e-211	1.04137	0.569	0.121	2.42483e-207	2
Prkn	4.52671e-211	1.15373	0.772	0.255	6.12826e-207	2
Col4a3	8.64604e-211	1.09497	0.891	0.395	1.1705e-206	2
Ror1	9.46161e-211	1.01796	0.576	0.122	1.28091e-206	2
Fhit	1.31083e-210	0.975537	0.772	0.228	1.7746e-206	2
Trps1	5.4315e-209	0.954484	0.77	0.232	7.35316e-205	2
Ptprj	3.97037e-208	1.04119	0.736	0.217	5.37509e-204	2
Mfsd4b5	4.48216e-207	0.959031	0.665	0.168	6.06794e-203	2
Kcnj15	7.5204e-207	0.996585	0.684	0.18	1.01811e-202	2
Tacc2	1.84616e-206	1.00268	0.673	0.181	2.49933e-202	2
P3h2	9.32351e-206	1.01092	0.597	0.137	1.26222e-201	2
Atp11a	3.40292e-205	1.15147	0.699	0.221	4.60687e-201	2
Clmn	1.11971e-204	1.02255	0.47	0.083	1.51586e-200	2
Pard3	1.14468e-204	1.04988	0.543	0.117	1.54966e-200	2
Ptpn13	1.37397e-203	0.968246	0.481	0.087	1.86008e-199	2
Snx29	2.47255e-203	1.05551	0.852	0.346	3.34733e-199	2
Erc2	4.8934e-202	0.999247	0.726	0.207	6.62469e-198	2
Hnf4a	2.59125e-200	0.992338	0.533	0.109	3.50803e-196	2
Fmn1	2.81804e-200	0.951042	0.555	0.119	3.81506e-196	2
Ranbp3l	1.88993e-199	1.03203	0.606	0.147	2.55858e-195	2
Gphn	1.42417e-198	0.908604	0.99	0.907	1.92804e-194	2
Pik3c2g	1.89838e-198	0.989545	0.479	0.089	2.57003e-194	2
Igf1r	1.24672e-197	1.08916	0.902	0.487	1.68781e-193	2
Col4a4	3.14974e-197	1.00485	0.74	0.242	4.26412e-193	2
Hnf1aos1	1.16191e-195	0.874816	0.714	0.203	1.573e-191	2
Klk1	1.48807e-195	0.960261	0.515	0.108	2.01455e-191	2
Zbtb20	2.0083e-194	0.802937	0.993	0.884	2.71884e-190	2
Kng2	5.9095e-193	0.973608	0.434	0.075	8.00028e-189	2
Fggy	8.36632e-193	0.883329	0.659	0.175	1.13263e-188	2
Cmss1	1.13018e-192	0.883286	1	0.991	1.53004e-188	2
Osbpl6	3.20129e-192	0.934167	0.643	0.166	4.33391e-188	2
Chd9	3.53932e-192	1.06094	0.908	0.534	4.79153e-188	2
Plekha7	3.70193e-191	0.885845	0.532	0.113	5.01167e-187	2
Mapt	4.13108e-191	1.11044	0.7	0.225	5.59265e-187	2
Slc17a3	6.69388e-190	0.926581	0.563	0.128	9.06217e-186	2
Patj	1.15094e-189	0.915975	0.49	0.096	1.55815e-185	2
Rgs6	1.26836e-189	1.08128	0.395	0.064	1.7171e-185	2
Slco1a6	2.45208e-189	0.906731	0.55	0.123	3.31963e-185	2
Slc22a28	7.82073e-189	0.944343	0.555	0.125	1.05877e-184	2
Pth1r	1.47779e-188	0.869959	0.847	0.3	2.00063e-184	2
Robo2	1.76291e-188	1.11187	0.38	0.059	2.38662e-184	2
Tinag	5.51185e-188	0.899966	0.528	0.114	7.46194e-184	2
Car12	7.17839e-188	0.876378	0.505	0.103	9.71811e-184	2
Nedd4l	5.79219e-187	0.988563	0.721	0.243	7.84146e-183	2
Bnc2	1.64626e-186	0.907686	0.556	0.128	2.22871e-182	2
Rab11fip3	2.15284e-186	0.945121	0.817	0.298	2.91451e-182	2
Slc22a30	2.4235e-185	0.888375	0.543	0.123	3.28094e-181	2
Ggt1	2.45919e-185	0.875613	0.837	0.306	3.32925e-181	2
Galnt14	5.79443e-185	0.885912	0.529	0.115	7.8445e-181	2
Veph1	6.27383e-185	0.843389	0.5	0.103	8.49351e-181	2
Pde4d	1.24649e-184	0.874578	0.971	0.637	1.6875e-180	2
Eps8	1.89879e-184	0.950472	0.436	0.079	2.57058e-180	2
Chka	7.12348e-184	0.953388	0.548	0.134	9.64377e-180	2
Slc7a13	1.23879e-183	0.987724	0.469	0.093	1.67707e-179	2
Kcnj16	4.79015e-183	0.883105	0.516	0.11	6.48491e-179	2
Iqgap2	1.17485e-182	0.956133	0.427	0.077	1.59051e-178	2
Thrb	4.44148e-182	0.927536	0.686	0.212	6.01287e-178	2
Gk	1.46625e-181	0.99784	0.5	0.11	1.98501e-177	2
Osbpl3	2.57758e-181	0.909166	0.596	0.151	3.48952e-177	2
Errfi1	3.86966e-181	0.908422	0.572	0.146	5.23875e-177	2
Nckap5	6.51563e-181	1.00328	0.407	0.07	8.82086e-177	2
Gpc4	8.30035e-181	0.8685	0.595	0.149	1.1237e-176	2
Dpyd	9.02199e-181	0.921576	0.512	0.112	1.2214e-176	2
Pdzrn3	2.19001e-180	0.851388	0.548	0.126	2.96483e-176	2
Aldob	5.80583e-180	0.907632	0.491	0.103	7.85993e-176	2
Aoah	4.20073e-179	0.955744	0.49	0.103	5.68694e-175	2
Arhgap42	5.54639e-179	0.895711	0.509	0.112	7.50871e-175	2
Hnf4aos	8.62651e-178	0.733373	0.557	0.129	1.16786e-173	2
S100g	2.76478e-177	0.865586	0.39	0.066	3.74296e-173	2
Phactr1	2.88732e-177	1.12237	0.585	0.181	3.90886e-173	2
Nox4	3.27927e-177	0.763161	0.522	0.117	4.43947e-173	2
Myo5b	1.22205e-176	0.88043	0.463	0.093	1.6544e-172	2
Wdr72	1.93375e-176	0.942866	0.463	0.095	2.6179e-172	2
Shank2	5.91297e-176	0.832961	0.524	0.118	8.00498e-172	2
Itpr1	2.01899e-175	0.989654	0.855	0.444	2.73331e-171	2
Hgd	2.63446e-175	0.814515	0.524	0.119	3.56654e-171	2
Hnf1b	8.4723e-175	0.764745	0.564	0.136	1.14698e-170	2
Chpt1	1.48115e-174	0.993167	0.698	0.25	2.00518e-170	2
Them7	2.55109e-174	0.759152	0.483	0.1	3.45366e-170	2
Fhod3	2.62271e-174	0.87906	0.563	0.139	3.55062e-170	2
Slc13a3	3.39594e-174	0.728219	0.633	0.17	4.59742e-170	2
Igsf5	1.75766e-173	0.890811	0.378	0.061	2.37952e-169	2
Ldc1	8.56371e-173	0.908445	0.513	0.12	1.15935e-168	2
Umod	4.89178e-172	1.00814	0.441	0.09	6.62249e-168	2
Slc18a1	1.24972e-171	0.855537	0.445	0.088	1.69187e-167	2
Pax8	2.36076e-171	0.843646	0.436	0.085	3.19599e-167	2
Paqr5	2.33473e-170	0.924792	0.43	0.085	3.16075e-166	2
Map7	2.56243e-170	0.874686	0.494	0.112	3.46902e-166	2
Kl	4.02466e-170	0.876698	0.396	0.07	5.44858e-166	2
Slc6a18	6.43659e-170	0.77182	0.584	0.152	8.71386e-166	2
Tfcp2l1	1.50121e-169	0.863893	0.479	0.105	2.03234e-165	2
Pter	4.09881e-169	0.885988	0.546	0.141	5.54897e-165	2
Gm45792	1.24619e-168	0.847554	0.329	0.046	1.6871e-164	2
Met	1.25049e-168	0.918887	0.531	0.133	1.69291e-164	2
Epb41l5	1.09989e-167	0.901105	0.387	0.068	1.48903e-163	2
Auts2	6.51484e-167	0.844766	0.619	0.179	8.81979e-163	2
Slc43a2	6.55961e-167	0.784509	0.445	0.091	8.8804e-163	2
Syne2	3.25485e-166	1.04897	0.785	0.384	4.40642e-162	2
Egfr	2.73595e-165	0.811288	0.463	0.098	3.70393e-161	2
Cpq	3.48778e-164	0.935095	0.453	0.1	4.72176e-160	2
Gm47283	6.75889e-164	0.897514	0.822	0.379	9.15018e-160	2
Fras1	9.33052e-164	0.87961	0.384	0.068	1.26317e-159	2
Akr1c21	1.04585e-162	0.803351	0.488	0.111	1.41587e-158	2
Hnf4g	3.44687e-162	0.781617	0.392	0.071	4.66637e-158	2
Dao	3.91359e-162	0.800965	0.439	0.091	5.29822e-158	2
Dab2	5.19389e-162	0.819154	0.886	0.477	7.03149e-158	2
Vdr	5.77095e-162	0.832034	0.454	0.099	7.81272e-158	2
D630024D03Rik	6.50668e-162	0.840025	0.336	0.052	8.80875e-158	2
Cldn10	1.06695e-161	0.747134	0.446	0.093	1.44444e-157	2
Eml5	1.08383e-161	0.933407	0.396	0.077	1.46729e-157	2
Trim7	9.19086e-161	0.758284	0.552	0.142	1.24426e-156	2
Plekha6	2.50398e-160	0.895541	0.436	0.093	3.38989e-156	2
Cgnl1	3.04893e-160	0.797971	0.65	0.211	4.12764e-156	2
Dapk1	7.625e-160	0.917445	0.525	0.144	1.03227e-155	2
Slc5a12	1.60317e-159	0.758934	0.416	0.083	2.17038e-155	2
Calb1	2.68781e-159	0.891552	0.326	0.049	3.63876e-155	2
Cubn	3.77011e-159	0.752284	0.45	0.096	5.10398e-155	2
Tmem117	9.5522e-159	0.988999	0.355	0.062	1.29318e-154	2
Slc22a12	2.9131e-158	0.849298	0.387	0.072	3.94375e-154	2
Pkp4	4.63166e-158	0.847986	0.75	0.302	6.27035e-154	2
Aass	5.53776e-158	0.970812	0.352	0.06	7.49702e-154	2
Dst	5.61508e-158	0.93875	0.691	0.262	7.60169e-154	2
Mlxipl	7.93023e-158	0.792202	0.448	0.097	1.07359e-153	2
Slc17a1	1.15897e-157	0.78963	0.422	0.086	1.56902e-153	2
Slit2	4.38588e-157	0.924845	0.338	0.055	5.9376e-153	2
Folr1	8.95703e-157	0.768732	0.42	0.085	1.2126e-152	2
Macrod2	3.38694e-156	0.877065	0.637	0.212	4.58523e-152	2
Pah	7.10273e-156	0.717055	0.48	0.11	9.61568e-152	2
Slc1a1	5.35709e-155	0.80305	0.422	0.09	7.25243e-151	2
Kank1	7.70583e-155	0.908404	0.418	0.089	1.04321e-150	2
Tns1	3.39076e-154	0.890323	0.891	0.588	4.59041e-150	2
Sord	2.16766e-153	0.776329	0.534	0.138	2.93458e-149	2
Adap2	3.28983e-153	0.893193	0.439	0.097	4.45378e-149	2
Tln2	4.70922e-153	0.84283	0.504	0.135	6.37535e-149	2
Phldb2	5.89859e-153	0.917727	0.798	0.401	7.98551e-149	2
Itgb6	8.14031e-153	0.701728	0.526	0.133	1.10203e-148	2
0610040J01Rik	3.24713e-152	0.757472	0.38	0.072	4.39596e-148	2
Pbld1	3.84516e-152	0.747759	0.392	0.076	5.20558e-148	2
Ppargc1a	5.58121e-152	0.845745	0.41	0.086	7.55584e-148	2
Vwa8	5.95205e-152	0.980441	0.597	0.207	8.05788e-148	2
Dennd1a	3.89619e-151	0.891212	0.769	0.363	5.27466e-147	2
Ppm1h	4.48323e-151	0.891842	0.604	0.198	6.06939e-147	2
Igsf11	4.59246e-151	0.675031	0.501	0.123	6.21727e-147	2
Slc22a18	9.43603e-151	0.737014	0.48	0.113	1.27745e-146	2
Pax2	2.37847e-150	0.774018	0.364	0.066	3.21998e-146	2
Me1	7.33337e-150	0.789124	0.381	0.074	9.92791e-146	2
Enpp2	5.54944e-149	0.791399	0.326	0.053	7.51283e-145	2
Sox6	1.0006e-148	0.880116	0.664	0.231	1.35461e-144	2
Pecr	1.15995e-148	0.699606	0.493	0.121	1.57034e-144	2
Gas2	1.21277e-148	0.725543	0.508	0.134	1.64184e-144	2
Maf	2.12133e-148	0.790457	0.522	0.144	2.87186e-144	2
Naaladl2	6.27559e-147	0.936982	0.312	0.051	8.49589e-143	2
Slc6a20b	6.61384e-147	0.767651	0.373	0.071	8.95382e-143	2
Sox5	6.62745e-147	0.961406	0.42	0.098	8.97224e-143	2
Ntn1	6.84639e-146	0.764637	0.433	0.099	9.26865e-142	2
Rufy3	6.20686e-145	0.814842	0.534	0.163	8.40285e-141	2
Col27a1	1.34377e-144	0.799064	0.344	0.063	1.8192e-140	2
Aldh1l1	2.56514e-144	0.798771	0.397	0.084	3.47269e-140	2
Mob3b	1.34259e-143	0.79944	0.448	0.111	1.81759e-139	2
0610005C13Rik	3.87397e-143	0.71023	0.446	0.103	5.24459e-139	2
Rhobtb1	4.87805e-143	0.746746	0.609	0.198	6.6039e-139	2
Slc22a23	8.3347e-143	0.62536	0.402	0.085	1.12835e-138	2
Kcnk5	9.36409e-143	0.771413	0.463	0.115	1.26771e-138	2
Stard10	2.47218e-142	0.705541	0.486	0.124	3.34683e-138	2
Cers6	3.15829e-142	0.745912	0.404	0.088	4.2757e-138	2
Slc26a4	4.3132e-142	0.916771	0.29	0.044	5.83921e-138	2
Napsa	4.3615e-142	0.711848	0.334	0.058	5.9046e-138	2
Pde1a	6.10194e-142	0.8034	0.351	0.066	8.26081e-138	2
St8sia1	8.42501e-142	0.76053	0.343	0.062	1.14058e-137	2
Rab3ip	1.18771e-141	0.806696	0.455	0.117	1.60792e-137	2
Hykk	3.96478e-141	0.836398	0.392	0.086	5.36752e-137	2
Hoga1	9.26196e-141	0.73232	0.378	0.077	1.25388e-136	2
Glyat	1.94647e-140	0.681792	0.461	0.113	2.63513e-136	2
Ces1f	3.13481e-140	0.78558	0.298	0.046	4.24391e-136	2
Ccdc141	1.74e-139	0.887147	0.453	0.115	2.35561e-135	2
Rbfox1	2.08536e-139	0.909724	0.324	0.058	2.82316e-135	2
Ptprk	2.36695e-139	0.83832	0.77	0.368	3.20438e-135	2
Cdkl1	6.38565e-139	0.745304	0.341	0.064	8.64489e-135	2
Zeb2	2.72699e-138	0.811076	0.68	0.259	3.6918e-134	2
Wwox	6.75575e-138	0.839298	0.723	0.307	9.14593e-134	2
Gcnt1	4.57295e-137	0.760082	0.588	0.195	6.19086e-133	2
Gpc6	6.29982e-137	0.969561	0.276	0.041	8.52869e-133	2
Lactb2	1.00945e-136	0.773215	0.567	0.184	1.36659e-132	2
Phyhipl	1.67878e-136	0.726556	0.363	0.073	2.27273e-132	2
Me3	2.51149e-136	0.768878	0.32	0.058	3.40005e-132	2
Itgb8	4.61681e-136	0.754674	0.333	0.061	6.25024e-132	2
Cryl1	7.0047e-136	0.707123	0.5	0.139	9.48297e-132	2
Itpr2	7.21512e-136	0.780324	0.674	0.281	9.76782e-132	2
Sema3c	7.7756e-136	0.765063	0.364	0.075	1.05266e-131	2
Ext1	8.46985e-136	0.825617	0.688	0.288	1.14665e-131	2
Retreg1	1.19002e-135	0.720669	0.358	0.072	1.61105e-131	2
Slc25a13	3.85206e-135	0.717443	0.372	0.078	5.21492e-131	2
AI314278	5.78238e-135	0.737541	0.335	0.063	7.82818e-131	2
Cacnb2	3.14448e-134	0.763298	0.268	0.039	4.257e-130	2
Ugt8a	6.47976e-134	0.7346	0.274	0.041	8.7723e-130	2
Stau2	9.31531e-134	0.772492	0.331	0.064	1.26111e-129	2
Tns3	1.21849e-133	0.874527	0.552	0.188	1.64959e-129	2
Nuak2	1.246e-133	0.820766	0.387	0.09	1.68684e-129	2
Msra	3.65571e-133	0.707146	0.565	0.183	4.9491e-129	2
Sgms2	4.77442e-133	0.773484	0.317	0.058	6.46361e-129	2
Nr1h4	1.12208e-132	0.729005	0.321	0.058	1.51907e-128	2
Ndrg1	1.50448e-132	0.811232	0.81	0.438	2.03676e-128	2
Camk1d	1.57244e-132	0.824784	0.95	0.773	2.12877e-128	2
Bckdhb	6.45539e-132	0.874721	0.413	0.105	8.73931e-128	2
Unc5c	1.83037e-131	0.77808	0.335	0.066	2.47796e-127	2
G6pc	7.17031e-131	0.713756	0.313	0.056	9.70717e-127	2
Ccser1	1.95966e-130	0.902343	0.417	0.11	2.65299e-126	2
Aadat	4.28118e-130	0.769241	0.302	0.053	5.79586e-126	2
Oxct1	8.23547e-130	0.796622	0.595	0.219	1.11492e-125	2
Klhl3	8.57637e-130	0.920973	0.326	0.065	1.16107e-125	2
Ptpro	1.26342e-129	0.800067	0.29	0.049	1.71042e-125	2
Adk	1.39234e-129	0.895841	0.485	0.148	1.88495e-125	2
Mecom	1.77255e-129	0.808211	0.804	0.401	2.39968e-125	2
Fam214a	1.81667e-129	0.803236	0.388	0.092	2.45941e-125	2
Mylk	2.34177e-129	0.925438	0.558	0.204	3.17029e-125	2
Ttc36	3.07141e-129	0.651999	0.35	0.072	4.15808e-125	2
Miox	6.66688e-129	0.692831	0.461	0.123	9.02562e-125	2
Tnfaip8	7.78704e-129	0.719972	0.551	0.182	1.05421e-124	2
Pclo	4.48958e-128	0.765329	0.298	0.053	6.07799e-124	2
Fah	6.32076e-128	0.720501	0.419	0.103	8.55705e-124	2
Pawr	7.95196e-128	0.724449	0.424	0.108	1.07654e-123	2
Pck1	9.5218e-128	0.766943	0.254	0.037	1.28906e-123	2
Acot12	1.67713e-127	0.713278	0.294	0.051	2.2705e-123	2
Col4a5	4.72464e-127	0.761269	0.287	0.049	6.39622e-123	2
AC149090.1	2.31618e-126	0.887285	0.665	0.3	3.13564e-122	2
Ugt1a-all	5.49668e-126	0.69885	0.326	0.064	7.44141e-122	2
Fermt1	6.81865e-126	0.698294	0.265	0.041	9.23109e-122	2
Palld	1.1847e-125	0.725574	0.371	0.084	1.60384e-121	2
Stk39	1.27527e-125	0.870545	0.436	0.124	1.72647e-121	2
Fhl2	1.29615e-125	0.950937	0.261	0.041	1.75473e-121	2
Slc16a9	1.7465e-125	0.789871	0.282	0.047	2.36441e-121	2
Cdh16	5.3918e-125	0.736112	0.291	0.051	7.29942e-121	2
Clcnkb	1.24892e-124	0.769238	0.293	0.053	1.69078e-120	2
Acss2	1.61598e-124	0.706647	0.379	0.091	2.18771e-120	2
Garem1	2.78015e-124	0.747721	0.349	0.077	3.76377e-120	2
D630045J12Rik	3.37087e-124	0.702124	0.32	0.063	4.56348e-120	2
Ptk2b	3.69748e-124	0.586383	0.352	0.075	5.00565e-120	2
Ugt3a2	4.95288e-124	0.739204	0.325	0.065	6.70521e-120	2
Cyfip2	9.65554e-124	0.696328	0.272	0.044	1.30717e-119	2
Spink1	1.56822e-123	0.773519	0.33	0.068	2.12305e-119	2
Ass1	1.65699e-123	0.686905	0.56	0.192	2.24323e-119	2
Sestd1	2.24832e-123	0.79445	0.381	0.096	3.04378e-119	2
Slc25a42	7.942e-123	0.743669	0.353	0.079	1.07519e-118	2
Dgkg	9.10311e-123	0.715605	0.28	0.048	1.23238e-118	2
Tanc2	1.19038e-121	0.833382	0.685	0.323	1.61154e-117	2
Bmpr1a	1.78589e-121	0.74221	0.252	0.039	2.41774e-117	2
Sema5a	4.49738e-121	0.69994	0.401	0.101	6.08856e-117	2
Epb41l1	4.5282e-121	0.637941	0.307	0.058	6.13027e-117	2
Slc22a1	4.66994e-121	0.624002	0.309	0.06	6.32216e-117	2
Gm20400	7.15114e-121	0.837786	0.28	0.052	9.68121e-117	2
Fbp1	1.06563e-120	0.660267	0.313	0.061	1.44265e-116	2
Pard3b	1.04345e-119	0.917945	0.677	0.332	1.41263e-115	2
Manba	1.106e-118	0.676915	0.46	0.139	1.49731e-114	2
Fam13a	3.29261e-118	0.647962	0.299	0.057	4.45754e-114	2
Lgr4	5.73979e-118	0.731085	0.373	0.092	7.77053e-114	2
B3gat2	6.14031e-118	0.617512	0.311	0.062	8.31276e-114	2
Ralgapa2	1.68067e-117	0.738493	0.515	0.179	2.27529e-113	2
Zfp618	2.01267e-117	0.730872	0.284	0.054	2.72476e-113	2
Dpp4	2.68506e-117	0.692684	0.263	0.044	3.63504e-113	2
Eps8l2	5.97993e-117	0.694556	0.452	0.133	8.09563e-113	2
Ugt2b38	7.17612e-117	0.648892	0.346	0.077	9.71503e-113	2
Pde4c	7.9261e-117	0.661843	0.296	0.056	1.07303e-112	2
Vegfa	8.98614e-117	0.719865	0.425	0.12	1.21654e-112	2
Sardh	1.6732e-116	0.751789	0.333	0.075	2.26518e-112	2
Cfh	1.76804e-116	0.927059	0.265	0.046	2.39357e-112	2
Mep1a	1.959e-116	0.624708	0.352	0.08	2.6521e-112	2
Nfia	5.05514e-116	0.759167	0.783	0.445	6.84364e-112	2
A1cf	6.4911e-116	0.60981	0.265	0.045	8.78765e-112	2
Kansl1l	7.57749e-116	0.839043	0.544	0.21	1.02584e-111	2
Lmo7	8.77989e-116	0.846532	0.498	0.172	1.18862e-111	2
Ldlrad3	1.52625e-115	0.821019	0.477	0.158	2.06624e-111	2
Diaph2	4.7739e-115	0.831947	0.494	0.17	6.4629e-111	2
Aldh8a1	2.27463e-114	0.658345	0.275	0.05	3.07939e-110	2
Slc3a1	2.71087e-114	0.650567	0.257	0.043	3.66998e-110	2
St3gal3	2.71132e-114	0.782064	0.411	0.118	3.67059e-110	2
Xylb	2.73707e-114	0.564046	0.333	0.073	3.70545e-110	2
Cmah	5.76471e-114	0.72826	0.363	0.091	7.80426e-110	2
Cdh1	7.11391e-114	0.599236	0.261	0.045	9.63081e-110	2
Prkca	3.41841e-113	0.760552	0.422	0.126	4.62785e-109	2
Nrg1	4.07258e-113	0.614751	0.303	0.061	5.51346e-109	2
Chd3	4.92884e-113	0.723521	0.614	0.253	6.67266e-109	2
Pabpn1	1.02247e-112	0.846907	0.695	0.366	1.38422e-108	2
Ddo	3.05015e-112	0.603065	0.251	0.042	4.12929e-108	2
Nt5e	3.79267e-112	0.681492	0.261	0.046	5.13452e-108	2
Agap1	4.92185e-112	0.780293	0.569	0.235	6.66319e-108	2
Smarca2	3.64745e-111	0.792957	0.677	0.33	4.93792e-107	2
Epb41	4.21642e-111	0.745134	0.602	0.253	5.7082e-107	2
Prkcz	4.33373e-111	0.665301	0.35	0.086	5.867e-107	2
Ahcyl2	1.00401e-110	0.726086	0.47	0.156	1.35923e-106	2
Aldh4a1	1.35707e-110	0.718529	0.3	0.065	1.8372e-106	2
Tnfrsf21	1.42262e-110	0.569383	0.325	0.071	1.92594e-106	2
Osbpl8	1.58193e-110	0.756853	0.644	0.297	2.14162e-106	2
Rora	1.74023e-110	0.818999	0.748	0.409	2.35593e-106	2
Dnase1	2.34623e-110	0.723228	0.251	0.043	3.17633e-106	2
Frmd4b	2.94013e-110	0.744173	0.72	0.382	3.98035e-106	2
Ddah1	3.94433e-110	0.732517	0.381	0.105	5.33984e-106	2
Wnk4	5.49736e-110	0.696232	0.308	0.066	7.44233e-106	2
Gatm	1.38045e-109	0.651892	0.386	0.103	1.86885e-105	2
Atxn1	1.62455e-109	0.646195	0.844	0.559	2.19931e-105	2
Snhg11	2.10067e-109	0.593953	0.317	0.069	2.84388e-105	2
Stxbp5l	2.65612e-109	0.588334	0.268	0.049	3.59586e-105	2
Arhgap6	3.47083e-109	0.72465	0.33	0.078	4.69881e-105	2
Acaa1b	4.68757e-109	0.589435	0.344	0.082	6.34603e-105	2
Nfyc	4.84371e-109	0.689881	0.524	0.195	6.55741e-105	2
Cndp1	1.21566e-108	0.6357	0.272	0.051	1.64576e-104	2
Pdzk1ip1	1.61144e-108	0.618206	0.335	0.079	2.18157e-104	2
Sema4d	1.7526e-108	0.57727	0.27	0.05	2.37267e-104	2
Fgf1	3.53735e-108	0.65157	0.62	0.27	4.78887e-104	2
Clybl	5.8298e-108	0.599219	0.397	0.112	7.89239e-104	2
Prkag2	7.59756e-108	0.641007	0.44	0.134	1.02856e-103	2
Zdhhc1	2.62932e-107	0.839808	0.442	0.148	3.55957e-103	2
Slc5a2	2.92247e-107	0.531728	0.292	0.061	3.95644e-103	2
Slc22a6	4.7867e-107	0.594458	0.267	0.05	6.48024e-103	2
Glis1	1.09257e-106	0.60269	0.358	0.091	1.47912e-102	2
Pcca	1.2633e-106	0.816887	0.431	0.142	1.71025e-102	2
Arhgef10l	3.34413e-106	0.670751	0.356	0.092	4.52728e-102	2
Cd63	3.34862e-106	0.857946	0.378	0.111	4.53336e-102	2
Greb1l	3.58366e-106	0.635947	0.286	0.058	4.85156e-102	2
Tom1l2	4.06149e-106	0.724669	0.653	0.311	5.49844e-102	2
Pank1	6.98962e-106	0.726294	0.341	0.085	9.46254e-102	2
Cndp2	7.92029e-106	0.721668	0.432	0.137	1.07225e-101	2
Pcx	9.77144e-106	0.56615	0.344	0.083	1.32286e-101	2
Golga4	2.16248e-105	0.705674	0.573	0.239	2.92756e-101	2
Ppp1r9a	2.79776e-105	0.615342	0.278	0.056	3.7876e-101	2
Abat	8.50252e-105	0.670634	0.265	0.051	1.15107e-100	2
Npnt	1.36555e-104	0.649214	0.33	0.081	1.84868e-100	2
Igfbp7	1.50761e-104	0.705263	0.77	0.371	2.04101e-100	2
Pdzd2	1.55443e-104	0.702509	0.628	0.283	2.10439e-100	2
Prkaa2	1.81314e-104	0.580696	0.285	0.06	2.45462e-100	2
Evc	5.28634e-104	0.637512	0.337	0.085	7.15664e-100	2
Tead1	1.44483e-103	0.712481	0.595	0.262	1.95601e-99	2
Prodh	1.88949e-103	0.650255	0.296	0.065	2.55799e-99	2
Lpl	2.0295e-103	0.636167	0.374	0.102	2.74753e-99	2
Mthfd1	2.94252e-103	0.604952	0.321	0.077	3.98358e-99	2
Acox1	1.49831e-102	0.819532	0.447	0.162	2.02841e-98	2
Nlrp6	3.59964e-102	0.624964	0.29	0.062	4.87319e-98	2
Mgat5	1.61499e-101	0.674525	0.48	0.175	2.18637e-97	2
Defb1	2.00567e-101	0.627618	0.269	0.055	2.71527e-97	2
Acy3	2.99094e-101	0.679264	0.298	0.069	4.04913e-97	2
Gss	1.29473e-100	0.628473	0.3	0.069	1.7528e-96	2
Epb41l3	1.40337e-100	0.612101	0.266	0.053	1.89988e-96	2
Snx24	2.97618e-100	0.670567	0.252	0.05	4.02915e-96	2
Pcyt2	5.66023e-100	0.585357	0.509	0.183	7.66282e-96	2
Cyp4b1	9.79676e-100	0.829095	0.708	0.387	1.32629e-95	2
Hoxb6	1.67565e-99	0.733667	0.488	0.189	2.26849e-95	2
Cltrn	3.6558e-99	0.535692	0.331	0.082	4.94923e-95	2
Arhgap32	4.37845e-99	0.644647	0.397	0.122	5.92755e-95	2
Cpeb3	4.47669e-99	0.755049	0.422	0.14	6.06055e-95	2
Cyp2j11	7.0946e-99	0.549819	0.253	0.048	9.60467e-95	2
Vps13b	1.08485e-98	0.798876	0.583	0.272	1.46867e-94	2
Lpgat1	1.37617e-98	0.792426	0.37	0.112	1.86306e-94	2
Herc3	2.13613e-98	0.632842	0.326	0.084	2.89189e-94	2
Arhgef28	3.52408e-98	0.633132	0.587	0.254	4.7709e-94	2
Pnisr	5.652e-98	0.687031	0.689	0.371	7.65167e-94	2
Map3k5	1.60024e-97	0.717154	0.564	0.251	2.16641e-93	2
Arhgap10	8.06466e-97	0.696608	0.501	0.196	1.09179e-92	2
Cspp1	2.74799e-96	0.718856	0.498	0.197	3.72022e-92	2
Mir99ahg	5.22232e-96	0.700961	0.629	0.291	7.06998e-92	2
Kidins220	1.31539e-95	0.741628	0.534	0.233	1.78078e-91	2
Cadm1	1.55824e-95	0.624074	0.256	0.053	2.10955e-91	2
Tmem116	3.04093e-95	0.559794	0.265	0.055	4.11681e-91	2
Ptpn3	4.63645e-95	0.622023	0.285	0.066	6.27683e-91	2
Atxn7l1	1.44371e-94	0.774505	0.429	0.155	1.95449e-90	2
Lrmda	2.23764e-94	0.648802	0.735	0.391	3.02932e-90	2
Papss2	3.39668e-94	0.535994	0.344	0.093	4.59842e-90	2
Cmip	3.78431e-94	0.661217	0.804	0.544	5.1232e-90	2
Immp2l	4.51302e-94	0.624899	0.438	0.15	6.10972e-90	2
Srr	5.85376e-94	0.694043	0.382	0.122	7.92483e-90	2
Ppp2r3a	8.04126e-94	0.692029	0.508	0.204	1.08863e-89	2
Sgsm2	2.34228e-93	0.613969	0.266	0.059	3.17098e-89	2
Slc9a8	3.27101e-93	0.645949	0.341	0.096	4.42829e-89	2
Lrba	3.58621e-93	0.775344	0.579	0.285	4.85501e-89	2
Selenbp1	3.71162e-93	0.688724	0.352	0.105	5.02479e-89	2
Cux1	9.87004e-93	0.674891	0.657	0.354	1.33621e-88	2
Slc22a8	1.02924e-92	0.522116	0.287	0.066	1.39338e-88	2
Arsb	1.19642e-92	0.551534	0.363	0.108	1.61972e-88	2
Cyp7b1	1.28357e-92	0.868763	0.337	0.1	1.7377e-88	2
Khk	1.37989e-92	0.620588	0.413	0.136	1.8681e-88	2
Tef	1.52232e-92	0.755761	0.345	0.103	2.06091e-88	2
Lrrk2	1.88048e-92	0.757105	0.491	0.203	2.54579e-88	2
Fto	1.88343e-92	0.699361	0.594	0.285	2.54978e-88	2
Aqp1	2.63274e-92	0.616532	0.256	0.055	3.5642e-88	2
Sdc4	3.08557e-92	0.572805	0.278	0.064	4.17724e-88	2
Frrs1	3.16564e-92	0.574619	0.257	0.055	4.28565e-88	2
Rere	6.45805e-92	0.693803	0.75	0.458	8.7429e-88	2
2210408F21Rik	7.65755e-92	0.725647	0.571	0.269	1.03668e-87	2
Lars2	1.03111e-91	0.652111	0.9	0.696	1.39592e-87	2
Kif16b	2.40378e-91	0.65245	0.402	0.135	3.25423e-87	2
C330002G04Rik	6.77688e-91	0.592857	0.252	0.053	9.17454e-87	2
Chchd3	1.36171e-90	0.751348	0.552	0.258	1.84348e-86	2
Atrnl1	1.81302e-90	0.735321	0.6	0.294	2.45447e-86	2
Hpn	4.82661e-90	0.485817	0.265	0.058	6.53426e-86	2
Sh3d19	1.24959e-89	0.667148	0.54	0.246	1.69169e-85	2
Ppargc1b	1.35104e-89	0.571797	0.255	0.055	1.82903e-85	2
1700012D14Rik	1.5585e-89	0.678154	0.291	0.075	2.1099e-85	2
Satb2	3.06788e-89	0.503998	0.275	0.064	4.1533e-85	2
Nr6a1	6.17234e-89	0.625759	0.364	0.114	8.35612e-85	2
Cryzl2	6.18471e-89	0.597028	0.291	0.074	8.37286e-85	2
Luc7l3	1.55539e-88	0.687338	0.656	0.355	2.10569e-84	2
Dglucy	2.0942e-88	0.583844	0.264	0.061	2.83512e-84	2
Farp1	6.90751e-88	0.673163	0.383	0.132	9.35138e-84	2
Eif4g3	1.2068e-87	0.715083	0.605	0.317	1.63376e-83	2
Ksr2	1.54193e-87	0.539714	0.256	0.056	2.08747e-83	2
Slco3a1	1.98816e-87	0.787676	0.599	0.312	2.69157e-83	2
Vti1a	2.31705e-87	0.712266	0.635	0.337	3.13682e-83	2
Pde3a	4.12509e-87	0.682832	0.251	0.057	5.58454e-83	2
Prodh2	5.4509e-87	0.489138	0.27	0.062	7.37943e-83	2
Myo6	7.80734e-87	0.688504	0.723	0.445	1.05696e-82	2
Parp8	8.18985e-87	0.67521	0.309	0.087	1.10874e-82	2
Trappc9	9.38155e-87	0.649129	0.406	0.144	1.27007e-82	2
Il31ra	1.911e-86	0.72384	0.464	0.187	2.58711e-82	2
Magi1	3.74305e-86	0.731808	0.64	0.341	5.06734e-82	2
Msi2	4.44509e-86	0.660832	0.754	0.473	6.01776e-82	2
Phactr2	8.79662e-86	0.784118	0.577	0.298	1.19089e-81	2
Kcnq1ot1	1.35471e-85	0.685751	0.451	0.175	1.834e-81	2
Glb1l	1.65305e-85	0.522539	0.257	0.059	2.2379e-81	2
Bphl	1.68712e-85	0.555021	0.291	0.076	2.28403e-81	2
Cobll1	1.15697e-83	0.621899	0.521	0.225	1.56631e-79	2
Adhfe1	1.38486e-83	0.607054	0.269	0.067	1.87483e-79	2
Taco1	2.4351e-83	0.633961	0.283	0.075	3.29664e-79	2
Nav2	4.82246e-83	0.615306	0.353	0.116	6.52865e-79	2
Trim2	9.32288e-83	0.72849	0.389	0.14	1.26213e-78	2
Shb	1.46176e-82	0.603023	0.359	0.12	1.97893e-78	2
Dync2h1	4.03354e-82	0.669057	0.291	0.081	5.4606e-78	2
Nos1ap	1.25044e-81	0.669016	0.378	0.135	1.69285e-77	2
Ttc7	2.17545e-81	0.500071	0.265	0.065	2.94512e-77	2
Ezr	2.58736e-81	0.555026	0.309	0.09	3.50277e-77	2
Macrod1	2.86379e-81	0.566755	0.261	0.064	3.877e-77	2
Slc25a10	4.58088e-81	0.612262	0.268	0.069	6.20159e-77	2
Srrm2	2.04663e-80	0.573842	0.8	0.571	2.77072e-76	2
Tango2	2.84755e-80	0.499231	0.365	0.119	3.85501e-76	2
Trio	3.51034e-80	0.619786	0.598	0.31	4.7523e-76	2
Pepd	3.85382e-80	0.574543	0.332	0.104	5.2173e-76	2
Znrf3	4.83039e-80	0.578903	0.253	0.062	6.53938e-76	2
Ube2e2	7.42524e-80	0.700088	0.406	0.156	1.00523e-75	2
Lrrc1	7.77983e-80	0.58227	0.26	0.066	1.05323e-75	2
Xylt1	1.03521e-79	0.559007	0.367	0.124	1.40147e-75	2
Sil1	1.51585e-79	0.678336	0.322	0.102	2.05216e-75	2
Lamb1	2.82379e-79	0.615137	0.262	0.068	3.82284e-75	2
Tbc1d14	3.38868e-79	0.595861	0.274	0.075	4.58759e-75	2
Plekha5	9.44446e-79	0.660789	0.404	0.155	1.27859e-74	2
Acss1	1.27472e-78	0.644187	0.356	0.121	1.72571e-74	2
Mitf	1.79104e-78	0.659452	0.299	0.089	2.4247e-74	2
Gm19951	1.00864e-77	0.667608	0.717	0.452	1.36549e-73	2
Larp1b	1.69806e-77	0.626342	0.35	0.121	2.29884e-73	2
Trpm7	2.05391e-77	0.700539	0.555	0.291	2.78058e-73	2
Myo15b	2.64992e-77	0.421462	0.264	0.066	3.58747e-73	2
Mast4	2.86852e-77	0.642914	0.64	0.352	3.8834e-73	2
Lrrc8d	5.78221e-77	0.68189	0.391	0.149	7.82796e-73	2
Ankib1	2.03249e-76	0.593871	0.446	0.188	2.75158e-72	2
Bcas3	3.13748e-76	0.636411	0.541	0.265	4.24752e-72	2
Rabgap1l	3.44735e-76	0.662698	0.467	0.206	4.66702e-72	2
Ubr5	1.18229e-75	0.668813	0.49	0.233	1.60058e-71	2
Bcl7a	1.6342e-75	0.648073	0.3	0.092	2.21237e-71	2
Fnbp1	2.07099e-75	0.722804	0.422	0.18	2.80371e-71	2
Slc16a2	4.03387e-75	0.618585	0.378	0.139	5.46106e-71	2
Firre	4.19867e-75	0.604422	0.269	0.076	5.68416e-71	2
Wdfy3	7.63709e-75	0.656126	0.624	0.365	1.03391e-70	2
Fbxl17	1.20349e-74	0.594531	0.645	0.367	1.62928e-70	2
Yars	1.80177e-74	0.682831	0.302	0.095	2.43924e-70	2
Safb2	2.30422e-74	0.713168	0.361	0.135	3.11945e-70	2
Sfxn1	5.49144e-74	0.604081	0.307	0.097	7.43431e-70	2
Mtor	7.59944e-74	0.604654	0.326	0.11	1.02881e-69	2
Pde4dip	9.0593e-74	0.616426	0.307	0.098	1.22645e-69	2
Ccdc50	8.26344e-73	0.683789	0.543	0.282	1.1187e-68	2
Dnmt3a	9.23133e-73	0.61848	0.488	0.227	1.24974e-68	2
Lpin2	1.43558e-72	0.620406	0.314	0.104	1.94349e-68	2
Mia2	2.01277e-72	0.659543	0.485	0.232	2.72489e-68	2
Thada	2.15559e-72	0.701483	0.352	0.131	2.91824e-68	2
Sipa1l1	8.37616e-72	0.632799	0.401	0.162	1.13397e-67	2
Cda	8.40851e-72	0.522696	0.28	0.083	1.13834e-67	2
Ctdspl	8.90675e-72	0.578861	0.505	0.238	1.2058e-67	2
Fam107b	1.42706e-71	0.527224	0.292	0.089	1.93196e-67	2
Phkb	1.47824e-71	0.624431	0.385	0.15	2.00124e-67	2
Dmxl1	1.60322e-71	0.685322	0.489	0.236	2.17044e-67	2
Sufu	2.82593e-71	0.539274	0.316	0.106	3.82575e-67	2
Arid1b	2.62078e-70	0.590329	0.645	0.381	3.54802e-66	2
Ggnbp2	3.08858e-70	0.702827	0.511	0.263	4.18132e-66	2
Slc22a5	5.38143e-70	0.47344	0.255	0.071	7.28539e-66	2
Nceh1	7.57793e-70	0.562263	0.37	0.141	1.0259e-65	2
Sik3	1.13945e-69	0.597093	0.576	0.317	1.54258e-65	2
Dtnb	1.70617e-69	0.557739	0.305	0.1	2.30982e-65	2
Ptpn4	2.63257e-69	0.595553	0.305	0.103	3.56397e-65	2
Fam193b	2.72833e-69	0.567485	0.362	0.134	3.69362e-65	2
Pam	6.35732e-69	0.591194	0.509	0.249	8.60654e-65	2
Chd2	6.96235e-69	0.627819	0.484	0.231	9.42563e-65	2
Upp2	8.7976e-69	0.657991	0.315	0.109	1.19102e-64	2
Lncpint	2.12692e-68	0.624537	0.616	0.361	2.87943e-64	2
Ncoa2	2.91794e-68	0.605319	0.536	0.283	3.95031e-64	2
2023-03-03	1.19586e-67	0.544391	0.315	0.106	1.61895e-63	2
Ldlrad4	1.46291e-67	0.636768	0.583	0.326	1.98049e-63	2
Gclc	4.56012e-67	0.641331	0.353	0.138	6.17349e-63	2
Ddx17	9.90754e-67	0.598278	0.568	0.323	1.34128e-62	2
Aspscr1	2.06802e-66	0.560794	0.323	0.115	2.79968e-62	2
Snx8	2.1018e-66	0.53831	0.254	0.074	2.84542e-62	2
Agps	2.88255e-66	0.665594	0.427	0.196	3.90239e-62	2
Rptor	3.13182e-66	0.592752	0.354	0.14	4.23986e-62	2
Ehbp1	3.29063e-66	0.640597	0.352	0.137	4.45485e-62	2
Map2k5	6.33958e-66	0.656804	0.38	0.16	8.58252e-62	2
Irak2	1.02635e-65	0.535012	0.373	0.15	1.38947e-61	2
Atp1a1	1.09891e-65	0.610399	0.656	0.419	1.48771e-61	2
Gab2	1.27782e-65	0.645291	0.477	0.23	1.72992e-61	2
Akap8l	1.29961e-65	0.559083	0.438	0.197	1.75941e-61	2
Uhrf1bp1l	1.31037e-65	0.537346	0.255	0.076	1.77397e-61	2
1110051M20Rik	2.76911e-65	0.503895	0.27	0.084	3.74882e-61	2
Rcor1	2.94126e-65	0.741428	0.378	0.162	3.98188e-61	2
Gng12	3.07806e-65	0.565579	0.566	0.322	4.16707e-61	2
Dock8	7.74685e-65	0.67454	0.335	0.127	1.04877e-60	2
Zfp704	9.8351e-65	0.593134	0.383	0.159	1.33148e-60	2
Cblb	2.9296e-64	0.679726	0.288	0.101	3.96609e-60	2
Strbp	3.56335e-64	0.585761	0.416	0.185	4.82407e-60	2
Usp24	7.44873e-64	0.651585	0.345	0.138	1.00841e-59	2
Abhd17c	9.87583e-64	0.559418	0.268	0.084	1.33699e-59	2
Ablim1	1.88855e-63	0.554868	0.545	0.285	2.55672e-59	2
Tpk1	2.2417e-63	0.53342	0.383	0.156	3.03482e-59	2
Kifc3	2.54207e-63	0.563596	0.402	0.176	3.44145e-59	2
Shroom4	3.56247e-63	0.626321	0.481	0.244	4.82288e-59	2
Ogt	4.48614e-63	0.636514	0.433	0.207	6.07334e-59	2
Nat8f1	5.08859e-63	0.374919	0.27	0.081	6.88894e-59	2
Brwd1	7.91356e-63	0.547143	0.419	0.187	1.07134e-58	2
Cpeb4	9.17518e-63	0.644212	0.457	0.229	1.24214e-58	2
Tdrd3	1.29592e-62	0.63808	0.297	0.106	1.75442e-58	2
Snx7	1.57176e-62	0.524326	0.281	0.093	2.12785e-58	2
Nt5c2	1.91065e-62	0.656838	0.285	0.099	2.58663e-58	2
Nsmce2	2.54245e-62	0.601361	0.437	0.209	3.44197e-58	2
Sltm	3.57931e-62	0.605073	0.58	0.333	4.84567e-58	2
Atxn2	3.13613e-61	0.588943	0.399	0.179	4.24569e-57	2
Fgd4	3.29403e-61	0.574126	0.375	0.155	4.45946e-57	2
Exoc4	1.41811e-60	0.66275	0.596	0.366	1.91984e-56	2
Galnt18	1.65422e-60	0.50408	0.538	0.282	2.23949e-56	2
Glb1	2.8423e-60	0.52166	0.312	0.116	3.8479e-56	2
Pcsk5	5.57062e-60	0.436222	0.477	0.221	7.5415e-56	2
Cdk8	9.71378e-60	0.482774	0.906	0.75	1.31505e-55	2
Mpp7	1.04036e-59	0.567814	0.264	0.087	1.40843e-55	2
Fars2	2.26202e-59	0.669269	0.391	0.179	3.06233e-55	2
Tet2	2.81628e-59	0.541342	0.322	0.123	3.81269e-55	2
Snd1	3.15941e-59	0.605062	0.377	0.165	4.2772e-55	2
4930402H24Rik	3.34202e-59	0.505714	0.544	0.305	4.52443e-55	2
Hdac8	3.50521e-59	0.578074	0.319	0.122	4.74536e-55	2
Ddi2	4.24645e-59	0.566026	0.387	0.171	5.74884e-55	2
Etv6	6.83275e-59	0.563137	0.525	0.29	9.25018e-55	2
Gigyf2	1.3646e-58	0.59263	0.43	0.209	1.8474e-54	2
Abcd3	1.50429e-58	0.609389	0.293	0.108	2.03651e-54	2
Lin52	1.54951e-58	0.522991	0.266	0.09	2.09773e-54	2
Ankrd17	4.54971e-58	0.567551	0.51	0.283	6.1594e-54	2
Arfgef1	6.08359e-58	0.655044	0.461	0.243	8.23596e-54	2
Scaper	1.28299e-57	0.653233	0.375	0.168	1.73692e-53	2
Cachd1	1.45208e-57	0.58985	0.312	0.12	1.96582e-53	2
Wdr7	1.6934e-57	0.667522	0.291	0.111	2.29252e-53	2
Vps13a	2.48383e-57	0.585641	0.4	0.184	3.36261e-53	2
Kazn	3.85255e-57	0.443192	0.257	0.084	5.21558e-53	2
Ankhd1	4.31158e-57	0.619427	0.533	0.309	5.83702e-53	2
Itgav	6.63261e-57	0.526943	0.297	0.111	8.97922e-53	2
Taok3	9.39721e-57	0.541748	0.276	0.098	1.27219e-52	2
Fnip2	9.96807e-57	0.540925	0.454	0.23	1.34948e-52	2
Myo1d	1.87778e-56	0.672193	0.496	0.277	2.54214e-52	2
Ammecr1l	2.00904e-56	0.580001	0.275	0.099	2.71984e-52	2
Myo10	3.07254e-56	0.607842	0.459	0.24	4.15961e-52	2
Snrnp70	3.99109e-56	0.543365	0.503	0.284	5.40313e-52	2
Pdss2	4.23732e-56	0.551247	0.303	0.115	5.73648e-52	2
Plxnb2	5.98407e-56	0.467662	0.258	0.087	8.10123e-52	2
Zmynd8	6.90822e-56	0.561937	0.483	0.262	9.35235e-52	2
Tbc1d13	9.454e-56	0.520675	0.253	0.084	1.27988e-51	2
Vps13d	1.77066e-55	0.543285	0.457	0.234	2.39712e-51	2
Ncoa1	2.41724e-55	0.628119	0.445	0.227	3.27246e-51	2
Tulp3	3.53574e-55	0.497371	0.254	0.086	4.78669e-51	2
Psme4	5.56701e-55	0.653914	0.384	0.183	7.53662e-51	2
Htt	6.25681e-55	0.574701	0.273	0.1	8.47047e-51	2
Rbm25	7.82888e-55	0.556521	0.611	0.394	1.05987e-50	2
Rreb1	7.83453e-55	0.592777	0.448	0.234	1.06064e-50	2
Ubn2	8.11858e-55	0.61889	0.538	0.323	1.09909e-50	2
Wwp1	2.34133e-54	0.565879	0.419	0.207	3.1697e-50	2
Parva	3.41975e-54	0.547781	0.393	0.187	4.62966e-50	2
Smad3	3.56093e-54	0.539275	0.279	0.104	4.82078e-50	2
Ambra1	1.39175e-53	0.64457	0.44	0.23	1.88416e-49	2
Slc7a7	1.91039e-53	0.401374	0.28	0.102	2.58628e-49	2
Scly	3.13559e-53	0.553907	0.268	0.099	4.24496e-49	2
Metap1d	6.83747e-53	0.474462	0.255	0.088	9.25657e-49	2
Hs6st1	1.31928e-52	0.497827	0.257	0.092	1.78604e-48	2
Pex14	1.47013e-52	0.576453	0.308	0.127	1.99026e-48	2
Aak1	1.77855e-52	0.525901	0.393	0.189	2.4078e-48	2
Zhx2	2.59101e-52	0.500491	0.321	0.132	3.50771e-48	2
Tmem135	3.293e-52	0.482967	0.373	0.171	4.45806e-48	2
Ppp1r12b	4.6124e-52	0.567489	0.311	0.13	6.24427e-48	2
Gpr137b	5.92485e-52	0.468346	0.31	0.125	8.02106e-48	2
Hacd2	1.01707e-51	0.570476	0.261	0.097	1.37691e-47	2
Mtss1	1.31542e-51	0.558184	0.548	0.338	1.78082e-47	2
Pi4ka	2.25351e-51	0.55156	0.322	0.136	3.0508e-47	2
Mertk	4.68476e-51	0.605645	0.455	0.252	6.34223e-47	2
Cdkal1	5.78693e-51	0.555721	0.416	0.212	7.83435e-47	2
Mark2	7.52505e-51	0.5408	0.403	0.203	1.01874e-46	2
Usp34	8.72649e-51	0.578655	0.589	0.388	1.18139e-46	2
Gbf1	8.88205e-51	0.5209	0.423	0.216	1.20245e-46	2
Sh3rf1	9.10946e-51	0.480247	0.576	0.351	1.23324e-46	2
Slc25a12	9.30067e-51	0.532455	0.269	0.102	1.25913e-46	2
Srek1	1.18205e-50	0.568897	0.485	0.277	1.60026e-46	2
Arl15	1.26018e-50	0.409998	0.728	0.485	1.70603e-46	2
Akr7a5	1.30919e-50	0.413052	0.291	0.113	1.77239e-46	2
Bmp6	1.55384e-50	0.33182	0.317	0.122	2.10359e-46	2
Mark3	4.25902e-50	0.496426	0.476	0.265	5.76587e-46	2
Grina	7.94234e-50	0.463214	0.37	0.174	1.07523e-45	2
Aff1	1.44246e-49	0.505306	0.403	0.205	1.9528e-45	2
Smyd3	1.51885e-49	0.525808	0.368	0.171	2.05623e-45	2
Mical3	1.52731e-49	0.539374	0.322	0.143	2.06767e-45	2
Ube4b	1.56282e-49	0.520728	0.326	0.145	2.11575e-45	2
Phf21a	2.53792e-49	0.558556	0.509	0.3	3.43584e-45	2
Ccar1	7.91307e-49	0.594379	0.413	0.217	1.07127e-44	2
Nktr	4.27213e-48	0.554958	0.456	0.255	5.78361e-44	2
Bach2	8.05074e-48	0.514082	0.37	0.179	1.08991e-43	2
Jarid2	2.01745e-47	0.50235	0.458	0.254	2.73122e-43	2
Galnt11	2.10099e-47	0.529833	0.304	0.131	2.84433e-43	2
Schip1	2.79733e-47	0.563813	0.385	0.193	3.78702e-43	2
Mapk14	2.95084e-47	0.434717	0.416	0.215	3.99485e-43	2
Mat2a	5.49656e-47	0.496796	0.604	0.401	7.44124e-43	2
Tnrc6a	1.15662e-46	0.491572	0.546	0.333	1.56584e-42	2
Dennd1b	1.85388e-46	0.586261	0.29	0.125	2.50979e-42	2
Pkd2	1.86552e-46	0.47788	0.399	0.206	2.52554e-42	2
Suclg2	2.49596e-46	0.447051	0.312	0.135	3.37904e-42	2
Ddx5	2.66708e-46	0.418117	0.839	0.69	3.6107e-42	2
Srgap1	3.6685e-46	0.593775	0.295	0.128	4.96641e-42	2
Myo9a	5.26716e-46	0.608482	0.397	0.211	7.13069e-42	2
Arhgap18	8.40749e-46	0.507815	0.46	0.252	1.13821e-41	2
Fndc3b	9.0194e-46	0.572886	0.483	0.288	1.22105e-41	2
Tmem245	9.78327e-46	0.539142	0.335	0.157	1.32446e-41	2
Lpp	1.25739e-45	0.490298	0.574	0.372	1.70225e-41	2
Nr3c2	1.31337e-45	0.531657	0.413	0.214	1.77804e-41	2
Nr2f2	4.25687e-45	0.528374	0.348	0.163	5.76295e-41	2
Ncor1	4.35048e-45	0.488851	0.64	0.456	5.88968e-41	2
Rfx7	4.51365e-45	0.469351	0.315	0.141	6.11058e-41	2
Atp2a2	7.71502e-45	0.441295	0.424	0.231	1.04446e-40	2
Tspan5	8.40587e-45	0.495901	0.297	0.128	1.13799e-40	2
Pde10a	9.23947e-45	0.681488	0.264	0.11	1.25084e-40	2
Rffl	1.14658e-44	0.431576	0.27	0.108	1.55224e-40	2
Trmt1l	1.84372e-44	0.518767	0.315	0.143	2.49603e-40	2
Gm39317	2.3517e-44	0.392403	0.283	0.114	3.18374e-40	2
Tbc1d5	3.45759e-44	0.467516	0.476	0.273	4.68088e-40	2
Rnf169	5.70979e-44	0.446792	0.427	0.233	7.72992e-40	2
A330023F24Rik	6.54931e-44	0.445071	0.307	0.135	8.86646e-40	2
Atp9b	1.00689e-43	0.602413	0.357	0.182	1.36312e-39	2
Mbtd1	1.22913e-43	0.486376	0.315	0.143	1.664e-39	2
Nf1	1.2834e-43	0.539761	0.376	0.193	1.73747e-39	2
Large1	1.44437e-43	0.479504	0.411	0.218	1.95539e-39	2
Fam133b	1.8134e-43	0.551116	0.37	0.191	2.45499e-39	2
BC005561	2.9305e-43	0.491838	0.378	0.193	3.96731e-39	2
Ssbp2	3.21531e-43	0.543523	0.271	0.114	4.35288e-39	2
Tcf25	4.72001e-43	0.455436	0.565	0.376	6.38995e-39	2
Plekhm2	5.45706e-43	0.436552	0.283	0.12	7.38777e-39	2
Wnk1	5.78699e-43	0.4974	0.622	0.437	7.83443e-39	2
Rnf152	1.20548e-42	0.480942	0.26	0.105	1.63197e-38	2
Zfp697	1.3988e-42	0.473878	0.277	0.119	1.89369e-38	2
Ypel2	1.43784e-42	0.433815	0.291	0.127	1.94654e-38	2
Slc30a9	1.4695e-42	0.513871	0.312	0.145	1.98941e-38	2
Csnk1g3	1.63682e-42	0.554829	0.33	0.162	2.21593e-38	2
Zfc3h1	1.87929e-42	0.543635	0.329	0.159	2.54418e-38	2
Ccnl2	1.94174e-42	0.517186	0.464	0.279	2.62872e-38	2
Maml3	2.11276e-42	0.527217	0.449	0.254	2.86026e-38	2
Leng8	2.72474e-42	0.495512	0.291	0.13	3.68875e-38	2
A730017L22Rik	2.9275e-42	0.526923	0.263	0.11	3.96325e-38	2
Ap2a2	5.22983e-42	0.475188	0.37	0.192	7.08014e-38	2
Cat	5.66643e-42	0.459215	0.281	0.123	7.67121e-38	2
D5Ertd579e	7.44764e-42	0.498848	0.275	0.119	1.00826e-37	2
Wwp2	1.80254e-41	0.485444	0.303	0.139	2.44028e-37	2
Sdccag8	1.86169e-41	0.434877	0.274	0.116	2.52036e-37	2
Ap3b1	2.85472e-41	0.45121	0.384	0.205	3.86472e-37	2
Huwe1	2.98398e-41	0.495108	0.478	0.294	4.03971e-37	2
Atxn7	3.44779e-41	0.508964	0.344	0.173	4.66762e-37	2
Btrc	4.62453e-41	0.497696	0.279	0.123	6.26069e-37	2
Peli2	1.1123e-40	0.525838	0.291	0.134	1.50583e-36	2
Rbm6	1.73001e-40	0.50112	0.428	0.245	2.34209e-36	2
Smg6	1.83621e-40	0.483018	0.442	0.258	2.48587e-36	2
Dip2c	2.06445e-40	0.445561	0.532	0.337	2.79485e-36	2
Pacsin2	3.48871e-40	0.480638	0.307	0.146	4.72301e-36	2
Smg7	4.10701e-40	0.5078	0.371	0.197	5.56006e-36	2
Rasa2	7.01194e-40	0.490205	0.272	0.119	9.49277e-36	2
Wls	1.1411e-39	0.467484	0.416	0.234	1.54482e-35	2
Tasor	1.58889e-39	0.532451	0.419	0.243	2.15104e-35	2
Sorbs1	2.09323e-39	0.464603	0.59	0.412	2.83382e-35	2
Chuk	2.1659e-39	0.522161	0.252	0.108	2.9322e-35	2
Prr14l	5.2462e-39	0.48745	0.29	0.135	7.10231e-35	2
Mbd5	5.4009e-39	0.46883	0.466	0.281	7.31174e-35	2
Kansl1	1.26435e-38	0.414418	0.591	0.409	1.71168e-34	2
Rin2	1.65728e-38	0.446614	0.45	0.269	2.24363e-34	2
Snhg20	1.88429e-38	0.536168	0.251	0.108	2.55096e-34	2
Tbck	1.97008e-38	0.459332	0.265	0.118	2.6671e-34	2
Exoc6	2.36234e-38	0.396972	0.341	0.171	3.19814e-34	2
Ppp6r3	2.45577e-38	0.470007	0.417	0.247	3.32463e-34	2
Tcf7l2	2.59465e-38	0.481352	0.415	0.236	3.51263e-34	2
Atp6v0a1	5.49103e-38	0.508585	0.251	0.109	7.43376e-34	2
Dcaf6	6.67918e-38	0.49069	0.304	0.147	9.04227e-34	2
Ivns1abp	9.08802e-38	0.426973	0.451	0.265	1.23034e-33	2
Wwc2	9.74904e-38	0.450411	0.562	0.394	1.31982e-33	2
Wdfy1	1.07969e-37	0.45717	0.283	0.131	1.46169e-33	2
Itch	1.954e-37	0.4736	0.466	0.29	2.64532e-33	2
Pan3	2.45846e-37	0.482513	0.474	0.299	3.32827e-33	2
Trim33	3.0539e-37	0.521242	0.291	0.14	4.13436e-33	2
Trip12	4.48304e-37	0.510228	0.464	0.294	6.06914e-33	2
Gon4l	4.80644e-37	0.506589	0.334	0.176	6.50695e-33	2
Cradd	5.29884e-37	0.446424	0.274	0.125	7.17358e-33	2
Fut8	6.92141e-37	0.421215	0.393	0.217	9.37021e-33	2
Atad2b	7.75882e-37	0.51176	0.352	0.19	1.05039e-32	2
Rev3l	1.1894e-36	0.481122	0.283	0.135	1.61021e-32	2
Samd4	1.82004e-36	0.525488	0.258	0.117	2.46397e-32	2
Akap9	2.50329e-36	0.47127	0.432	0.26	3.38896e-32	2
Luc7l2	2.96994e-36	0.419981	0.579	0.409	4.0207e-32	2
Zfand3	3.62449e-36	0.424099	0.512	0.34	4.90684e-32	2
Kat6b	5.03983e-36	0.454967	0.317	0.16	6.82292e-32	2
Xpr1	5.07428e-36	0.438735	0.354	0.19	6.86957e-32	2
Kif13b	6.06269e-36	0.485702	0.317	0.162	8.20767e-32	2
Fam172a	6.28143e-36	0.470396	0.432	0.259	8.5038e-32	2
Ssh2	7.06478e-36	0.465657	0.358	0.192	9.5643e-32	2
Ubac2	9.44266e-36	0.501484	0.278	0.133	1.27835e-31	2
Rai1	1.07031e-35	0.456404	0.272	0.128	1.44898e-31	2
Gpatch2	1.16601e-35	0.41949	0.266	0.123	1.57854e-31	2
Faf1	1.61161e-35	0.472298	0.386	0.221	2.1818e-31	2
Eri3	2.32403e-35	0.429624	0.265	0.123	3.14627e-31	2
Trak1	4.06017e-35	0.441015	0.302	0.151	5.49666e-31	2
Nemf	4.20358e-35	0.494856	0.343	0.187	5.6908e-31	2
Mapkap1	4.2976e-35	0.448877	0.357	0.196	5.81809e-31	2
Far1	4.68042e-35	0.518889	0.326	0.173	6.33635e-31	2
Tcn2	5.604e-35	0.341483	0.526	0.344	7.58669e-31	2
Larp4b	7.07396e-35	0.411925	0.412	0.244	9.57673e-31	2
Ankrd13c	8.30235e-35	0.442768	0.294	0.146	1.12397e-30	2
Dazap1	1.26961e-34	0.409292	0.357	0.195	1.71879e-30	2
Vmp1	1.3232e-34	0.447353	0.325	0.169	1.79134e-30	2
Zranb1	1.35363e-34	0.43667	0.316	0.161	1.83255e-30	2
Foxo3	1.89255e-34	0.474048	0.253	0.116	2.56213e-30	2
Chd8	1.99145e-34	0.417192	0.317	0.163	2.69602e-30	2
Dleu2	2.01526e-34	0.477773	0.415	0.251	2.72826e-30	2
Atf6	2.80463e-34	0.527893	0.259	0.124	3.79691e-30	2
Ppp1r12a	3.64574e-34	0.494369	0.54	0.374	4.9356e-30	2
Dlg1	3.7885e-34	0.474697	0.376	0.217	5.12887e-30	2
Pde7b	3.85266e-34	0.43685	0.353	0.19	5.21573e-30	2
Setd2	4.6455e-34	0.46241	0.351	0.196	6.28908e-30	2
Asxl2	5.44603e-34	0.460092	0.349	0.192	7.37284e-30	2
Tnrc6b	6.34635e-34	0.425668	0.556	0.386	8.59169e-30	2
Ogdh	6.39769e-34	0.407226	0.45	0.285	8.66119e-30	2
Enox2	8.02426e-34	0.40359	0.298	0.147	1.08632e-29	2
Ppfia1	8.03801e-34	0.407068	0.276	0.134	1.08819e-29	2
Clint1	9.40241e-34	0.414994	0.396	0.234	1.2729e-29	2
Gstt2	1.32986e-33	0.311417	0.253	0.115	1.80037e-29	2
Dcbld1	6.45332e-33	0.408648	0.261	0.121	8.7365e-29	2
Ap3d1	7.78633e-33	0.397128	0.251	0.117	1.05411e-28	2
Mllt10	9.83259e-33	0.433091	0.48	0.32	1.33114e-28	2
Nipbl	2.2833e-32	0.394298	0.595	0.436	3.09113e-28	2
Ldhb	2.84473e-32	0.466414	0.32	0.17	3.85119e-28	2
Nectin3	3.08307e-32	0.347967	0.256	0.12	4.17386e-28	2
Sgms1	5.73776e-32	0.38023	0.473	0.309	7.76778e-28	2
Mkln1	5.79691e-32	0.443144	0.483	0.323	7.84786e-28	2
Son	7.04008e-32	0.352743	0.789	0.666	9.53085e-28	2
Tmcc1	8.25781e-32	0.467516	0.421	0.261	1.11794e-27	2
Mtmr12	8.57044e-32	0.436746	0.277	0.139	1.16027e-27	2
Usp3	9.51195e-32	0.412251	0.3	0.156	1.28773e-27	2
Tex14	1.73918e-31	0.358786	0.391	0.225	2.3545e-27	2
Oxr1	2.03604e-31	0.34582	0.607	0.442	2.7564e-27	2
Pik3r1	2.71517e-31	0.49231	0.342	0.195	3.6758e-27	2
Btbd9	2.9792e-31	0.477055	0.436	0.278	4.03324e-27	2
Nudt4	3.12938e-31	0.455701	0.327	0.181	4.23656e-27	2
Tnrc18	3.39543e-31	0.401525	0.352	0.199	4.59674e-27	2
Cox16	3.76731e-31	0.428269	0.448	0.286	5.10019e-27	2
Dnajc13	4.72689e-31	0.366894	0.307	0.162	6.39926e-27	2
Gcnt2	4.80478e-31	0.435437	0.367	0.214	6.50471e-27	2
[truncated: 4,469 more rows]

## Sheet: Cluster Genes - Merged Ctrl
Table S3	Cluster marker genes by adjusted p-value for each cluster in normotensive samples
gene	p_val	avg_log2FC	pct.1	pct.2	p_val_adj	cluster
Slc8a1	8.27671e-16	0.291697	0.676	0.578	9.65809e-12	0
Magi2	9.62012e-10	0.254123	0.728	0.652	1.12257e-05	0
Plcl1	1.29625e-07	0.33476	0.423	0.378	0.00151259	0
Slc34a1	5.72491e-15	0.41989	0.802	0.858	6.68039e-11	1
Keg1	9.70298e-15	1.03663	0.434	0.426	1.13224e-10	1
Acsm2	9.50159e-11	0.404314	0.671	0.761	1.10874e-06	1
Dab2	1.51465e-09	0.582048	0.632	0.732	1.76745e-05	1
Prrc2c	2.43148e-08	0.27839	0.192	0.331	0.000283729	1
Nox4	1.04987e-07	0.37743	0.183	0.306	0.0012251	1
Fnip2	1.8204e-07	0.280017	0.185	0.311	0.00212422	1
Ahcyl2	2.66366e-07	0.271313	0.192	0.321	0.00310823	1
Ccnl2	3.08275e-07	0.306973	0.17	0.287	0.00359726	1
Dock9	7.231e-07	0.288514	0.156	0.261	0.00843786	1
Rufy3	7.27671e-07	0.253888	0.191	0.315	0.0084912	1
Setbp1	1.11431e-55	0.394531	0.647	0.275	1.30029e-51	2
Snd1	9.96114e-52	0.331283	0.406	0.148	1.16237e-47	2
Pbld1	1.67007e-50	0.294608	0.404	0.144	1.9488e-46	2
Lmo7	1.24659e-48	0.253655	0.506	0.201	1.45465e-44	2
Pawr	2.84017e-48	0.282176	0.467	0.181	3.31419e-44	2
Bckdhb	1.13002e-47	0.257867	0.465	0.18	1.31862e-43	2
Fgd4	1.52245e-47	0.315554	0.387	0.143	1.77655e-43	2
Zswim6	2.8736e-47	0.312868	0.439	0.174	3.3532e-43	2
Tmem117	4.88835e-47	0.336494	0.399	0.15	5.70422e-43	2
Hoxb6	4.02866e-46	0.283468	0.524	0.218	4.70104e-42	2
Robo2	1.63319e-45	0.310325	0.289	0.095	1.90577e-41	2
Csmd1	2.11691e-45	0.277695	0.279	0.089	2.47023e-41	2
Tfcp2l1	3.02539e-45	0.263581	0.476	0.192	3.53033e-41	2
Vps13a	4.01827e-45	0.286855	0.436	0.175	4.68892e-41	2
Sil1	4.56193e-45	0.299851	0.35	0.127	5.32332e-41	2
Slc12a1	1.14773e-44	0.339773	0.926	0.55	1.33928e-40	2
Adamtsl1	1.96576e-44	0.344265	0.266	0.084	2.29385e-40	2
Clmn	4.24621e-44	0.259938	0.448	0.177	4.95491e-40	2
Paqr5	4.70584e-44	0.260648	0.359	0.131	5.49125e-40	2
Gpc6	8.39073e-44	0.337282	0.279	0.092	9.79114e-40	2
Iqgap2	1.77006e-43	0.269251	0.352	0.13	2.06549e-39	2
Pde8a	2.18523e-43	0.275641	0.347	0.129	2.54995e-39	2
Pde3a	2.73558e-43	0.298129	0.269	0.086	3.19214e-39	2
Igsf11	5.08566e-43	0.268458	0.426	0.17	5.93445e-39	2
Mical3	5.4552e-43	0.346596	0.314	0.111	6.36568e-39	2
Slc26a4	1.03562e-41	0.303015	0.274	0.091	1.20846e-37	2
Lrba	1.38789e-41	0.28289	0.604	0.277	1.61953e-37	2
Nrip1	4.40687e-41	0.30552	0.348	0.134	5.14238e-37	2
Ubn2	8.08721e-41	0.276738	0.561	0.256	9.43697e-37	2
Bcl6	6.77341e-40	0.253217	0.308	0.111	7.90389e-36	2
Gbf1	1.46401e-39	0.259705	0.423	0.177	1.70835e-35	2
Palld	3.52981e-39	0.251323	0.323	0.12	4.11893e-35	2
Pclo	5.24679e-38	0.268729	0.274	0.096	6.12248e-34	2
Rffl	1.39991e-37	0.264417	0.3	0.112	1.63355e-33	2
Schip1	1.81231e-35	0.272277	0.27	0.1	2.11479e-31	2
Fryl	1.6327e-33	0.294093	0.323	0.134	1.90519e-29	2
St3gal4	7.84932e-33	0.280584	0.258	0.098	9.15937e-29	2
Cmip	2.90635e-31	0.278353	0.793	0.445	3.39142e-27	2
Fabp4	0	5.16485	0.602	0.021	0	3
Ly6c1	0	4.04725	0.637	0.032	0	3
Ifitm3	0	3.8851	0.699	0.029	0	3
Gng11	0	3.76508	0.629	0.016	0	3
Ppia	0	3.66544	0.834	0.079	0	3
Ubb	0	3.56753	0.807	0.053	0	3
Tm4sf1	0	3.51625	0.602	0.025	0	3
Id3	0	3.46179	0.61	0.01	0	3
Ifitm2	0	3.20108	0.656	0.024	0	3
Hspb1	0	2.79024	0.483	0.011	0	3
Tcim	0	2.7757	0.483	0.01	0	3
Klf2	0	2.76661	0.51	0.012	0	3
Ramp2	0	2.3554	0.429	0.005	0	3
Cavin3	0	2.33898	0.44	0.005	0	3
Sox18	0	2.03845	0.382	0.001	0	3
Bst2	6.17077e-307	2.76059	0.498	0.014	7.20067e-303	3
B2m	3.21798e-294	3.38397	0.71	0.052	3.75506e-290	3
Rps23	1.01088e-293	2.98036	0.819	0.074	1.1796e-289	3
Id1	8.43847e-292	2.28856	0.425	0.008	9.84685e-288	3
S100a6	2.2965e-291	3.17257	0.552	0.023	2.67978e-287	3
Rps28	1.92004e-289	2.64224	0.78	0.064	2.2405e-285	3
Srgn	1.45571e-288	3.01599	0.587	0.03	1.69867e-284	3
Rpl39	1.9785e-285	2.66492	0.788	0.067	2.30872e-281	3
Gng5	2.92886e-281	2.61543	0.61	0.034	3.41769e-277	3
Gpihbp1	3.50689e-280	2.70338	0.375	0.005	4.09218e-276	3
Rpl30	1.56152e-279	2.79115	0.788	0.07	1.82213e-275	3
Myl12a	8.07029e-277	2.20132	0.529	0.022	9.41722e-273	3
Rps18	3.18323e-276	2.77293	0.803	0.076	3.71451e-272	3
Uqcrb	1.44397e-274	2.49623	0.575	0.03	1.68497e-270	3
Tmsb4x	9.35551e-274	3.27844	0.865	0.102	1.09169e-269	3
Rps27	6.2346e-273	3.10047	0.857	0.098	7.27515e-269	3
Rpl35a	6.77218e-272	2.89857	0.815	0.082	7.90246e-268	3
Rpl34	4.75561e-270	2.68174	0.753	0.065	5.54933e-266	3
Rps5	1.53538e-269	2.53589	0.749	0.062	1.79164e-265	3
Calm1	4.94979e-268	3.09429	0.73	0.065	5.77591e-264	3
Rps21	3.54179e-265	3.20295	0.834	0.097	4.13292e-261	3
Rps16	6.45442e-264	2.82078	0.795	0.08	7.53167e-260	3
H2-T23	2.69648e-261	2.33925	0.467	0.017	3.14653e-257	3
Tinagl1	8.2983e-260	2.04394	0.425	0.012	9.68329e-256	3
H2-D1	6.69954e-258	3.44899	0.676	0.056	7.8177e-254	3
Rps3	1.24469e-257	2.60934	0.753	0.069	1.45243e-253	3
Rpl27	8.03669e-257	2.36418	0.683	0.052	9.37801e-253	3
Rps7	1.36068e-256	2.44351	0.683	0.053	1.58778e-252	3
Rps3a1	8.07719e-256	2.54918	0.749	0.068	9.42527e-252	3
Cdh5	9.2465e-255	2.12777	0.459	0.017	1.07897e-250	3
Rps15a	8.21063e-254	2.58619	0.822	0.09	9.58098e-250	3
Icam2	1.52223e-253	2.006	0.398	0.01	1.77629e-249	3
Tomm7	2.17108e-253	2.10691	0.494	0.021	2.53344e-249	3
Dynll1	4.25455e-252	2.26415	0.517	0.026	4.96464e-248	3
S100a13	9.04063e-252	2.56674	0.552	0.031	1.05495e-247	3
Rpl35	5.10757e-251	2.66838	0.73	0.067	5.96002e-247	3
Ptma	8.65729e-249	3.15067	0.853	0.113	1.01022e-244	3
Rps14	3.92767e-248	2.99872	0.795	0.09	4.5832e-244	3
Selenom	3.28494e-246	2.10216	0.506	0.024	3.8332e-242	3
Ctla2a	2.58701e-245	2.7567	0.375	0.009	3.01878e-241	3
Selenok	3.05622e-245	2.12645	0.479	0.021	3.5663e-241	3
Crip2	2.46972e-244	2.26379	0.541	0.03	2.88191e-240	3
Rps4x	2.57562e-243	2.55593	0.707	0.063	3.00549e-239	3
AY036118	5.20699e-243	3.88309	0.938	0.168	6.07604e-239	3
S100a16	3.05354e-242	1.92069	0.421	0.014	3.56318e-238	3
Rpl9	6.87594e-242	2.97058	0.78	0.088	8.02354e-238	3
Rps6	1.93425e-240	2.35168	0.614	0.043	2.25708e-236	3
Rpl27a	1.13888e-238	2.78355	0.822	0.102	1.32896e-234	3
Crip1	1.44335e-237	2.95231	0.486	0.024	1.68424e-233	3
Rpl32	4.79344e-237	2.54935	0.757	0.079	5.59346e-233	3
Rpl37a	2.94542e-235	3.03164	0.861	0.126	3.43701e-231	3
1810037I17Rik	4.53557e-235	1.76046	0.405	0.013	5.29256e-231	3
Uba52	5.56729e-234	2.7941	0.815	0.103	6.49647e-230	3
S100a10	2.199e-233	2.64625	0.517	0.03	2.56602e-229	3
AU021092	4.55869e-232	2.12014	0.429	0.016	5.31954e-228	3
S100a11	4.68097e-232	2.2549	0.498	0.026	5.46223e-228	3
Tspo	5.1286e-232	2.12489	0.483	0.024	5.98456e-228	3
Cd300lg	1.93229e-231	2.33856	0.448	0.019	2.25479e-227	3
Sparc	2.14464e-229	2.61822	0.595	0.045	2.50259e-225	3
Rpl23	3.81397e-228	2.73691	0.853	0.119	4.45053e-224	3
Rps10	6.40856e-227	2.56995	0.795	0.097	7.47815e-223	3
Rps29	1.80628e-224	3.09926	0.876	0.145	2.10774e-220	3
Fam167b	1.4795e-223	1.67814	0.313	0.005	1.72642e-219	3
Rps26	1.49961e-223	2.44721	0.691	0.066	1.7499e-219	3
Rpl7	1.16179e-222	2.32967	0.68	0.064	1.3557e-218	3
Rpl22	6.04985e-220	2.27553	0.676	0.064	7.05957e-216	3
Cd200	2.92335e-218	2.52798	0.533	0.036	3.41125e-214	3
Rps11	2.26289e-216	2.34117	0.749	0.085	2.64057e-212	3
Eif1	3.17544e-216	2.71346	0.726	0.084	3.70542e-212	3
Rps13	1.42948e-214	2.38007	0.703	0.074	1.66806e-210	3
Rps27a	5.56535e-214	2.54824	0.784	0.101	6.49421e-210	3
H3f3a	6.70692e-212	2.59104	0.695	0.077	7.82631e-208	3
Esm1	1.40465e-210	3.33247	0.375	0.013	1.63909e-206	3
Sem1	4.35876e-210	2.12457	0.556	0.042	5.08624e-206	3
Btf3	6.07859e-210	1.96125	0.494	0.03	7.0931e-206	3
Ost4	6.22968e-210	1.85399	0.413	0.018	7.26942e-206	3
Rpl19	3.80316e-209	2.6698	0.78	0.106	4.4379e-205	3
Txn1	6.65544e-208	2.36377	0.568	0.046	7.76623e-204	3
Rpl26	2.40412e-206	2.4196	0.788	0.104	2.80537e-202	3
Gngt2	7.87367e-206	2.03373	0.398	0.017	9.18779e-202	3
Thbd	5.96861e-205	1.45549	0.278	0.004	6.96477e-201	3
Rps20	8.19929e-205	2.57355	0.776	0.105	9.56775e-201	3
Cfl1	1.68415e-204	1.97938	0.514	0.035	1.96524e-200	3
Esam	1.88663e-204	2.02079	0.429	0.021	2.20151e-200	3
Psmb8	5.06335e-204	1.95024	0.405	0.018	5.90843e-200	3
Rplp2	4.14685e-203	2.38004	0.73	0.087	4.83896e-199	3
Rps24	1.12939e-202	2.62494	0.842	0.137	1.31788e-198	3
Elob	1.52074e-202	2.04969	0.579	0.048	1.77455e-198	3
Rpl24	1.549e-201	2.55244	0.753	0.096	1.80753e-197	3
Ndufa4	2.8478e-201	2.55701	0.695	0.078	3.3231e-197	3
Selenow	3.05652e-201	2.19548	0.579	0.05	3.56665e-197	3
Arpc3	4.07381e-201	2.02736	0.51	0.035	4.75373e-197	3
Ndufa1	6.53216e-201	1.92725	0.405	0.019	7.62238e-197	3
Gimap6	6.84541e-200	2.18343	0.471	0.029	7.98791e-196	3
Eva1b	1.0355e-199	1.65755	0.417	0.02	1.20832e-195	3
Rpl36a	1.06204e-199	2.15697	0.598	0.053	1.23929e-195	3
Cd34	5.73453e-199	1.70503	0.382	0.016	6.69162e-195	3
H3f3b	3.27761e-197	2.46009	0.683	0.079	3.82465e-193	3
Serf2	4.48121e-197	2.35376	0.71	0.085	5.22913e-193	3
Rps19	7.06413e-197	2.4875	0.803	0.12	8.24313e-193	3
Krtcap2	7.49224e-197	1.79266	0.417	0.021	8.7427e-193	3
Slc9a3r2	1.07753e-196	2.5762	0.583	0.054	1.25738e-192	3
Rpl7a	1.85042e-196	1.93705	0.556	0.045	2.15926e-192	3
Rps9	1.53226e-195	2.26474	0.737	0.093	1.78799e-191	3
Rpl17	5.70692e-195	2.32382	0.73	0.091	6.65941e-191	3
Selenof	2.00068e-194	1.93853	0.49	0.034	2.33459e-190	3
Rpl29	2.05037e-193	2.22245	0.653	0.069	2.39258e-189	3
Rps12	6.39056e-191	2.40763	0.772	0.11	7.45714e-187	3
Rpl37	1.93043e-188	2.60166	0.849	0.152	2.25262e-184	3
Sec61g	7.50189e-188	1.90423	0.463	0.03	8.75396e-184	3
Rpl15	1.13152e-187	1.75227	0.371	0.016	1.32037e-183	3
Tmsb10	4.87305e-187	2.17641	0.521	0.041	5.68636e-183	3
Thrsp	5.34354e-187	1.40673	0.255	0.004	6.23537e-183	3
Clec14a	7.29989e-186	1.51621	0.286	0.006	8.51824e-182	3
Rpl10	1.46338e-185	2.29367	0.676	0.081	1.70762e-181	3
Ccdc85b	5.89183e-185	1.74673	0.405	0.021	6.87518e-181	3
Snrpf	1.85749e-184	1.62439	0.347	0.014	2.16751e-180	3
Laptm4a	1.02421e-183	2.33525	0.61	0.065	1.19515e-179	3
Kdr	1.14894e-182	2.92333	0.51	0.044	1.3407e-178	3
Gimap5	3.98526e-182	1.47551	0.297	0.008	4.6504e-178	3
Tpt1	4.3857e-182	2.91633	0.892	0.201	5.11767e-178	3
Anxa5	1.20355e-181	1.91707	0.436	0.027	1.40442e-177	3
Atp5j	2.01103e-181	2.36056	0.598	0.061	2.34667e-177	3
Psmb10	2.70112e-181	1.63964	0.34	0.013	3.15193e-177	3
Rps8	3.15454e-181	2.78706	0.822	0.152	3.68103e-177	3
Dpm3	2.13342e-180	1.4864	0.344	0.014	2.48949e-176	3
Plvap	8.23123e-180	3.29409	0.494	0.042	9.60502e-176	3
Rras	9.00358e-180	1.58481	0.313	0.01	1.05063e-175	3
Rhob	1.9519e-179	1.90494	0.413	0.024	2.27767e-175	3
S1pr1	4.00466e-179	1.34876	0.29	0.008	4.67304e-175	3
Tuba1a	9.77513e-179	1.39553	0.259	0.005	1.14066e-174	3
Tuba1b	1.11604e-178	1.65253	0.309	0.01	1.3023e-174	3
Cd81	7.541e-177	2.62257	0.629	0.077	8.79959e-173	3
Smco4	5.42499e-176	1.58966	0.448	0.03	6.33042e-172	3
Rabac1	5.46301e-176	1.86159	0.552	0.052	6.37479e-172	3
Anxa3	6.83938e-175	1.88785	0.432	0.028	7.98087e-171	3
Rpl11	8.7643e-175	2.20987	0.741	0.108	1.02271e-170	3
Cox8a	9.69098e-175	2.52238	0.734	0.106	1.13084e-170	3
Rpl18	1.38727e-174	2.20581	0.656	0.08	1.6188e-170	3
Cox7a2	4.46602e-174	2.19793	0.629	0.072	5.2114e-170	3
Rplp1	6.08931e-173	2.59101	0.838	0.166	7.10562e-169	3
Hmgb1	1.23135e-172	2.08858	0.668	0.085	1.43686e-168	3
Cox7c	1.60374e-172	2.44723	0.664	0.084	1.87141e-168	3
Rpl6	2.22839e-172	2.25827	0.707	0.099	2.6003e-168	3
H2-Q4	1.56484e-171	1.53145	0.34	0.015	1.82601e-167	3
Hes1	6.80452e-171	1.99919	0.378	0.021	7.94019e-167	3
Snrpg	1.511e-170	1.64055	0.417	0.026	1.76318e-166	3
Sgk1	2.45591e-170	2.24952	0.456	0.035	2.8658e-166	3
Atox1	1.18639e-169	2.17103	0.602	0.068	1.3844e-165	3
AW112010	1.58796e-169	1.75094	0.297	0.01	1.85299e-165	3
Ramp3	5.30516e-169	1.58891	0.305	0.011	6.19059e-165	3
Cst3	7.19023e-169	2.375	0.699	0.101	8.39028e-165	3
Sh3bgrl3	8.06049e-169	1.8418	0.467	0.036	9.40579e-165	3
Rpl3	2.37202e-168	2.20644	0.695	0.095	2.76791e-164	3
Sumo2	2.22704e-167	1.78798	0.521	0.048	2.59873e-163	3
Gimap4	3.47219e-166	1.79558	0.347	0.017	4.0517e-162	3
Hint1	3.65813e-166	1.90978	0.56	0.057	4.26868e-162	3
Psmb9	7.18049e-166	1.37039	0.297	0.01	8.37891e-162	3
Myct1	2.90615e-165	1.34059	0.266	0.007	3.39119e-161	3
Rpl21	3.31378e-165	2.4017	0.811	0.149	3.86685e-161	3
Ndufa7	4.3065e-164	1.92063	0.486	0.042	5.02526e-160	3
Ecscr	5.52753e-164	1.31377	0.263	0.007	6.45007e-160	3
Cd9	3.733e-163	2.15011	0.459	0.038	4.35604e-159	3
Rpl22l1	7.15343e-163	1.67752	0.398	0.025	8.34734e-159	3
Gnai2	2.23448e-161	2.19151	0.583	0.068	2.60742e-157	3
Itm2b	1.14648e-159	2.63763	0.784	0.153	1.33783e-155	3
Ndufb11	3.0949e-159	1.89015	0.444	0.035	3.61144e-155	3
Ehd4	5.56006e-159	2.30811	0.564	0.065	6.48803e-155	3
Rpl12	6.87137e-158	1.86617	0.571	0.064	8.0182e-154	3
Naca	9.22768e-158	1.96005	0.595	0.07	1.07678e-153	3
Ubl5	4.71159e-156	1.8116	0.432	0.034	5.49795e-152	3
Cd24a	5.32632e-156	1.89604	0.382	0.025	6.21528e-152	3
Rgcc	7.39241e-156	2.8586	0.429	0.035	8.6262e-152	3
Gnas	2.11119e-155	2.57039	0.764	0.15	2.46355e-151	3
Ran	3.16266e-155	1.37068	0.282	0.01	3.69051e-151	3
Drap1	1.12906e-153	1.37523	0.313	0.014	1.3175e-149	3
Rpl8	1.33809e-153	2.26521	0.776	0.144	1.56142e-149	3
Rps2	1.45604e-153	2.1442	0.714	0.112	1.69905e-149	3
Rpl13	2.98641e-153	2.3911	0.876	0.216	3.48484e-149	3
Tceal9	1.53657e-152	1.42925	0.274	0.01	1.79303e-148	3
H2afz	2.1557e-152	1.53005	0.402	0.028	2.51549e-148	3
Clic1	3.17363e-152	1.7263	0.533	0.056	3.70331e-148	3
Edf1	4.56281e-152	1.64403	0.49	0.046	5.32434e-148	3
Oaz1	1.97996e-151	1.75424	0.475	0.044	2.31042e-147	3
Txnip	6.7018e-151	2.12669	0.552	0.065	7.82033e-147	3
Eef1a1	1.71077e-150	2.46878	0.834	0.194	1.99629e-146	3
Ndufc2	8.572e-149	1.68555	0.394	0.028	1.00027e-144	3
Rack1	1.49198e-148	1.8556	0.591	0.073	1.74099e-144	3
Map1lc3b	1.00457e-147	1.67367	0.398	0.03	1.17223e-143	3
Ly6a	1.55845e-147	2.9856	0.668	0.116	1.81856e-143	3
Cox5a	6.22497e-147	1.80491	0.471	0.044	7.26392e-143	3
Calm2	8.83336e-147	1.98084	0.564	0.069	1.03076e-142	3
Anxa2	1.31359e-145	1.92078	0.471	0.046	1.53283e-141	3
Rps25	2.67361e-145	2.02074	0.625	0.088	3.11983e-141	3
Ifi27	1.43574e-144	1.65826	0.398	0.03	1.67536e-140	3
Myl12b	4.29742e-143	1.96016	0.568	0.072	5.01466e-139	3
Rps17	5.06232e-143	1.98452	0.61	0.083	5.90722e-139	3
Tmem50a	1.5635e-142	1.46862	0.394	0.03	1.82444e-138	3
Srp14	1.08028e-141	1.36586	0.297	0.014	1.26058e-137	3
Tnfaip2	1.7495e-141	1.81771	0.448	0.042	2.04149e-137	3
Chchd2	2.17886e-141	2.17442	0.734	0.133	2.54252e-137	3
Btg1	7.31491e-141	1.72196	0.39	0.03	8.53577e-137	3
H2-K1	7.80692e-141	2.52656	0.645	0.105	9.10989e-137	3
Cav2	3.30558e-140	1.28118	0.251	0.009	3.85728e-136	3
Rpl38	3.73172e-140	2.08551	0.822	0.182	4.35454e-136	3
Ly6e	1.34531e-139	2.67355	0.653	0.116	1.56984e-135	3
Jun	4.36532e-139	1.59421	0.34	0.021	5.09389e-135	3
Ppib	2.87602e-138	1.77202	0.479	0.05	3.35602e-134	3
Vamp5	2.95316e-138	1.99003	0.452	0.045	3.44604e-134	3
Snrpb	3.01865e-138	1.41828	0.375	0.028	3.52247e-134	3
Il10rb	4.44858e-138	1.52857	0.363	0.026	5.19104e-134	3
Lmo2	4.47176e-138	1.62525	0.344	0.023	5.2181e-134	3
Gimap1	4.62644e-138	1.5053	0.336	0.021	5.39859e-134	3
Pomp	7.72369e-138	1.6412	0.378	0.029	9.01277e-134	3
Cox6b1	1.25517e-137	2.15808	0.602	0.086	1.46466e-133	3
Tprgl	3.06253e-137	1.25299	0.324	0.019	3.57367e-133	3
Ltbp4	3.17238e-137	1.50699	0.313	0.018	3.70185e-133	3
Smdt1	2.51095e-136	1.63521	0.44	0.042	2.93003e-132	3
Gabarapl2	4.79149e-136	1.42838	0.34	0.022	5.59119e-132	3
Fau	6.70541e-136	2.13312	0.861	0.233	7.82454e-132	3
Pfdn5	9.76963e-135	1.76967	0.571	0.075	1.14002e-130	3
Psme1	1.51257e-134	1.65885	0.409	0.036	1.76502e-130	3
Cox6c	2.6282e-134	2.30668	0.687	0.118	3.06685e-130	3
Tmem59	6.83163e-134	1.64148	0.475	0.051	7.97183e-130	3
Atp6v1g1	7.00374e-134	1.47157	0.432	0.041	8.17266e-130	3
Sec61b	2.21454e-133	1.48487	0.313	0.019	2.58415e-129	3
Naa38	2.35209e-133	1.3453	0.27	0.012	2.74465e-129	3
Rps27l	3.0155e-133	1.41858	0.363	0.027	3.51878e-129	3
Eef1b2	8.6335e-133	1.41418	0.405	0.035	1.00744e-128	3
Cox17	1.75174e-132	1.6267	0.394	0.033	2.0441e-128	3
Ndufa5	2.06186e-132	1.66011	0.429	0.04	2.40598e-128	3
Romo1	4.02336e-132	1.51935	0.355	0.026	4.69486e-128	3
Cmtm8	5.89185e-132	1.6315	0.39	0.033	6.8752e-128	3
Atp5e	6.33122e-132	2.10094	0.633	0.1	7.3879e-128	3
Rsad2	4.01931e-131	2.65072	0.471	0.055	4.69014e-127	3
Psme2	5.18498e-131	1.32949	0.282	0.014	6.05036e-127	3
Rpl18a	1.51818e-129	2.0056	0.757	0.159	1.77156e-125	3
Mrfap1	1.32431e-128	1.37352	0.363	0.028	1.54534e-124	3
Rplp0	3.53843e-128	1.83917	0.595	0.088	4.129e-124	3
Psma2	8.65009e-128	1.31195	0.34	0.024	1.00938e-123	3
Atp5g2	1.03127e-127	1.66976	0.506	0.061	1.20339e-123	3
Slc25a4	2.28878e-127	1.53857	0.39	0.034	2.67077e-123	3
Tie1	6.85588e-127	1.4697	0.363	0.029	8.00012e-123	3
Jup	1.52542e-126	1.58945	0.429	0.043	1.78002e-122	3
Egfl7	6.06023e-126	2.43168	0.579	0.095	7.07168e-122	3
Rnf7	9.37589e-126	1.19885	0.27	0.014	1.09407e-121	3
Ndufb1-ps	9.43843e-126	1.67934	0.394	0.036	1.10137e-121	3
Mrps14	1.28771e-125	1.23166	0.263	0.013	1.50263e-121	3
Cavin2	1.6627e-125	1.5462	0.251	0.011	1.9402e-121	3
Ndufc1	1.90133e-125	1.66872	0.459	0.051	2.21866e-121	3
Pfn1	1.97753e-125	1.73857	0.49	0.059	2.30758e-121	3
Rpl36	9.47124e-124	2.06859	0.795	0.193	1.1052e-119	3
Rpl23a	2.847e-123	1.6491	0.421	0.043	3.32217e-119	3
Rpl41	5.90815e-123	2.20111	0.876	0.282	6.89422e-119	3
Ctsl	1.3774e-122	1.72085	0.432	0.046	1.60729e-118	3
Snrpe	5.43577e-122	1.2181	0.286	0.017	6.343e-118	3
Hsbp1	7.35536e-122	1.25733	0.317	0.022	8.58297e-118	3
Slc50a1	8.60585e-122	1.25527	0.293	0.018	1.00422e-117	3
Eif5a	7.57303e-121	1.51372	0.429	0.045	8.83697e-117	3
Nedd8	1.14907e-119	1.39343	0.452	0.051	1.34085e-115	3
Cd93	2.50015e-119	1.43221	0.282	0.017	2.91742e-115	3
Sub1	2.91692e-119	1.43325	0.336	0.026	3.40375e-115	3
Atp6v1f	6.47728e-119	1.67323	0.382	0.036	7.55834e-115	3
Nme2	3.11978e-118	1.72999	0.595	0.095	3.64047e-114	3
Psmb6	4.10037e-118	1.34874	0.359	0.031	4.78472e-114	3
Igfbp3	8.20894e-118	2.7646	0.378	0.038	9.57901e-114	3
Fundc2	9.90218e-118	1.07055	0.255	0.013	1.15549e-113	3
Ifi44	2.06871e-117	1.64107	0.32	0.024	2.41398e-113	3
Cd38	3.92684e-117	1.15742	0.278	0.017	4.58223e-113	3
Ndufa8	5.98523e-117	1.6597	0.367	0.034	6.98416e-113	3
Tmem14c	8.54167e-117	1.18884	0.317	0.023	9.96727e-113	3
Tmem204	1.79259e-115	1.40293	0.293	0.02	2.09178e-111	3
Npm1	2.55544e-115	1.33737	0.363	0.032	2.98195e-111	3
Fkbp1a	5.50891e-115	1.62892	0.402	0.043	6.42835e-111	3
Imp3	9.59399e-115	1.21388	0.274	0.017	1.11952e-110	3
Ifi203	1.52558e-114	1.60192	0.394	0.04	1.7802e-110	3
Atp5md	2.73072e-114	1.8158	0.44	0.052	3.18648e-110	3
Tma7	2.76502e-113	1.41132	0.371	0.035	3.2265e-109	3
Ndufb9	2.58052e-112	1.7011	0.452	0.055	3.01121e-108	3
Clec2d	1.32256e-111	1.95197	0.51	0.075	1.54329e-107	3
Efnb2	1.39147e-111	1.49929	0.34	0.03	1.6237e-107	3
Tagln2	3.87305e-111	1.5341	0.351	0.032	4.51947e-107	3
Atp5h	1.32537e-110	1.93622	0.575	0.096	1.54658e-106	3
Emp3	1.41777e-110	1.17427	0.259	0.015	1.65439e-106	3
Mapk3	1.62185e-110	1.23938	0.297	0.021	1.89254e-106	3
Cetn3	2.08403e-110	1.0102	0.255	0.014	2.43186e-106	3
Cox5b	2.85912e-110	1.91275	0.575	0.094	3.3363e-106	3
Ndufb3	5.34532e-109	1.47195	0.375	0.038	6.23745e-105	3
Psenen	7.4135e-109	1.12344	0.274	0.018	8.65081e-105	3
Rpl36al	2.07639e-108	1.62654	0.421	0.05	2.42294e-104	3
Psmb5	2.88234e-108	1.32989	0.32	0.027	3.3634e-104	3
Psma7	2.78973e-107	1.43732	0.44	0.055	3.25534e-103	3
Bloc1s1	6.13709e-107	1.51826	0.336	0.031	7.16137e-103	3
Arpc1b	4.34555e-106	1.44207	0.347	0.033	5.07083e-102	3
Gapdh	5.64833e-106	1.6805	0.452	0.06	6.59104e-102	3
Epas1	1.44686e-105	1.76965	0.602	0.11	1.68834e-101	3
Ndufa13	1.69083e-104	1.60354	0.506	0.076	1.97303e-100	3
Atp5j2	9.14417e-104	1.6169	0.571	0.098	1.06703e-99	3
Nfkbia	9.22364e-104	1.38918	0.328	0.03	1.07631e-99	3
Prkar1a	1.79895e-103	1.43515	0.432	0.055	2.09919e-99	3
Prdx2	3.32912e-103	1.42262	0.313	0.027	3.88475e-99	3
Rasip1	3.43235e-103	1.15666	0.286	0.021	4.00521e-99	3
Ywhah	4.7253e-102	1.05505	0.263	0.018	5.51395e-98	3
Serpinh1	5.60514e-102	1.30497	0.282	0.021	6.54064e-98	3
Tubb5	6.59498e-102	1.28037	0.251	0.016	7.69568e-98	3
Ybx1	1.94653e-101	1.66653	0.61	0.114	2.27141e-97	3
Bri3	2.95027e-101	1.58939	0.394	0.046	3.44268e-97	3
Tmem256	3.56414e-101	1.02195	0.274	0.02	4.159e-97	3
Cox7b	4.36889e-100	1.85465	0.44	0.06	5.09806e-96	3
Emcn	6.55782e-100	2.76817	0.614	0.152	7.65232e-96	3
Sap18	6.56062e-100	1.12582	0.259	0.018	7.65558e-96	3
Kank3	9.80607e-100	1.2174	0.344	0.035	1.14427e-95	3
Slc43a3	1.09138e-99	1.08409	0.27	0.02	1.27353e-95	3
Nop10	1.14725e-99	1.29996	0.263	0.019	1.33873e-95	3
Grcc10	1.45106e-99	1.31012	0.382	0.044	1.69325e-95	3
Nol7	1.93952e-99	1.17139	0.266	0.019	2.26323e-95	3
Adgrl4	4.17089e-99	2.05246	0.556	0.106	4.86701e-95	3
Cwc15	5.45463e-99	1.32515	0.274	0.021	6.365e-95	3
Serinc3	6.18487e-99	1.84672	0.595	0.12	7.21713e-95	3
Rpl14	1.10061e-98	1.55235	0.544	0.093	1.28431e-94	3
Lamtor5	1.24093e-97	1.03535	0.263	0.019	1.44804e-93	3
Cops9	4.24089e-97	1.31085	0.278	0.022	4.94869e-93	3
Rnaset2b	1.77292e-96	1.24455	0.32	0.031	2.06882e-92	3
Actb	2.13569e-96	2.07163	0.849	0.313	2.49213e-92	3
Lamtor2	4.82132e-96	1.29577	0.29	0.025	5.626e-92	3
Ssr4	5.65361e-96	1.05829	0.286	0.024	6.5972e-92	3
Pecam1	6.41897e-96	1.69857	0.506	0.085	7.4903e-92	3
Ifnar2	6.85278e-96	1.29665	0.405	0.052	7.99651e-92	3
Ndufb4	3.84277e-95	1.43849	0.29	0.025	4.48412e-91	3
Snrpd2	1.00957e-94	1.20546	0.286	0.025	1.17807e-90	3
Plscr2	2.10291e-94	2.09754	0.575	0.12	2.45389e-90	3
Scand1	1.01371e-93	1.07058	0.398	0.05	1.1829e-89	3
Uqcrh	2.82643e-93	1.89139	0.521	0.092	3.29816e-89	3
Podxl	3.14028e-93	1.79034	0.533	0.098	3.66439e-89	3
Sptssa	4.01996e-93	1.15653	0.297	0.027	4.6909e-89	3
Cd47	5.17761e-93	1.67587	0.471	0.077	6.04175e-89	3
Dusp3	7.70243e-93	1.30619	0.293	0.027	8.98797e-89	3
Rpl31	2.7365e-92	1.49421	0.541	0.097	3.19322e-88	3
Apoe	3.383e-92	1.53909	0.49	0.083	3.94763e-88	3
Gabarap	6.93145e-92	1.36646	0.486	0.078	8.08831e-88	3
S100a1	1.51459e-91	1.50669	0.432	0.063	1.76738e-87	3
Ptprb	1.7109e-91	1.93233	0.564	0.116	1.99645e-87	3
Arpc5	2.12776e-91	1.29949	0.324	0.034	2.48288e-87	3
Actg1	3.67939e-91	1.86193	0.552	0.108	4.29348e-87	3
Rbx1	3.80493e-91	1.2294	0.452	0.068	4.43997e-87	3
Gnb2	4.28843e-91	1.35715	0.436	0.064	5.00417e-87	3
Igfbp5	4.76935e-91	3.38143	0.633	0.179	5.56536e-87	3
Adgrf5	2.61817e-90	1.61055	0.506	0.089	3.05514e-86	3
Rhoa	3.78147e-90	1.5434	0.544	0.103	4.4126e-86	3
Arf5	7.03046e-90	1.17237	0.371	0.046	8.20384e-86	3
Psmb3	2.4519e-89	1.08041	0.332	0.036	2.86112e-85	3
Rnaset2a	2.59609e-89	1.24888	0.324	0.035	3.02938e-85	3
Slfn5	2.81795e-89	1.43606	0.398	0.054	3.28826e-85	3
Uqcc2	3.56352e-89	1.4945	0.398	0.055	4.15827e-85	3
Ppp1r11	5.316e-89	1.05427	0.27	0.023	6.20324e-85	3
Eng	5.5818e-89	2.002	0.56	0.119	6.51341e-85	3
Pcbp1	8.24824e-89	1.00996	0.259	0.021	9.62487e-85	3
Ostf1	1.25536e-88	1.27035	0.402	0.055	1.46488e-84	3
Tek	1.28394e-88	1.53528	0.475	0.079	1.49823e-84	3
Tpm4	1.65901e-88	1.31092	0.317	0.033	1.9359e-84	3
Txndc17	2.61873e-88	1.15642	0.278	0.025	3.0558e-84	3
Mmrn2	4.09221e-88	1.20408	0.274	0.024	4.7752e-84	3
Psmb4	4.79972e-88	1.16379	0.324	0.035	5.6008e-84	3
Ndufa2	8.58395e-88	1.45699	0.521	0.093	1.00166e-83	3
Atp5l	4.42574e-87	1.68026	0.579	0.119	5.1644e-83	3
Emc7	1.2144e-86	1.01312	0.263	0.022	1.41708e-82	3
Fth1	1.31918e-86	1.81402	0.865	0.303	1.53936e-82	3
Dstn	3.88606e-86	1.41934	0.409	0.059	4.53464e-82	3
Plscr1	4.07754e-86	1.18397	0.274	0.025	4.75809e-82	3
Cox6a1	7.80723e-86	1.48962	0.467	0.078	9.11026e-82	3
Slc25a5	1.26698e-85	1.59164	0.367	0.048	1.47844e-81	3
Ptpru	2.28612e-85	1.46126	0.274	0.026	2.66767e-81	3
Atp5mpl	2.30117e-85	1.44666	0.328	0.038	2.68524e-81	3
Rpl4	5.00724e-85	1.4293	0.405	0.059	5.84295e-81	3
Rhoc	7.2911e-85	1.26501	0.278	0.026	8.50799e-81	3
Dad1	1.1634e-84	1.31133	0.344	0.042	1.35757e-80	3
Rasgrp3	1.35431e-84	1.48797	0.378	0.052	1.58035e-80	3
Swi5	3.0404e-84	1.1014	0.332	0.039	3.54784e-80	3
Kitl	7.40957e-84	1.59888	0.402	0.061	8.64623e-80	3
Nenf	7.79633e-84	1.11605	0.301	0.032	9.09754e-80	3
Ets2	1.16558e-83	0.987311	0.263	0.023	1.36011e-79	3
Psmb1	1.24145e-83	1.21119	0.359	0.046	1.44865e-79	3
Exoc3l2	2.32922e-83	1.54558	0.421	0.067	2.71796e-79	3
Flt1	2.40061e-83	2.25414	0.614	0.165	2.80127e-79	3
Eif3k	2.73256e-83	1.27288	0.328	0.039	3.18863e-79	3
Cycs	2.92708e-83	1.53637	0.293	0.031	3.41561e-79	3
Ehd3	8.55314e-83	1.8126	0.309	0.035	9.98066e-79	3
Tomm6	9.03011e-83	1.2922	0.378	0.053	1.05372e-78	3
Rpl28	9.61939e-83	1.64848	0.822	0.292	1.12249e-78	3
Pdcd5	1.0994e-82	1.09907	0.27	0.026	1.28289e-78	3
Ndufb7	2.70905e-82	1.39758	0.44	0.071	3.16118e-78	3
Rac1	3.64805e-82	1.39816	0.417	0.065	4.25691e-78	3
Hypk	3.8039e-82	1.01418	0.286	0.029	4.43877e-78	3
Plpp3	4.66511e-82	2.33057	0.568	0.141	5.44372e-78	3
B230219D22Rik	7.26782e-82	1.34828	0.332	0.041	8.48082e-78	3
Ppp1r2	9.34749e-82	1.277	0.375	0.052	1.09076e-77	3
H2-Q7	4.5646e-81	1.13104	0.293	0.031	5.32643e-77	3
Lrrc8c	5.95386e-81	1.05815	0.317	0.037	6.94756e-77	3
Ndufb10	1.11978e-80	1.34131	0.409	0.063	1.30667e-76	3
Cnbp	1.53603e-80	1.35032	0.417	0.066	1.7924e-76	3
Rbm8a	1.79968e-80	1.07123	0.259	0.024	2.10005e-76	3
2023-09-07	2.05996e-79	1.20355	0.444	0.074	2.40377e-75	3
Aldoa	2.14223e-79	1.50356	0.564	0.121	2.49977e-75	3
Tmco1	3.13839e-79	1.01407	0.266	0.026	3.66218e-75	3
Tspan15	6.89259e-79	0.926214	0.259	0.024	8.04296e-75	3
Uqcr11	7.29826e-79	1.48389	0.556	0.117	8.51634e-75	3
Ywhab	3.29813e-78	1.17941	0.382	0.057	3.84859e-74	3
Ndufa6	1.35358e-77	1.26238	0.363	0.052	1.57949e-73	3
Higd1a	3.47809e-77	1.09315	0.251	0.024	4.05858e-73	3
Chmp2a	1.32215e-76	1.30213	0.375	0.056	1.54282e-72	3
Mrpl33	1.19774e-75	1.2523	0.32	0.041	1.39764e-71	3
Arhgap31	1.37835e-75	1.39107	0.436	0.077	1.6084e-71	3
Cdc42	1.85329e-75	1.33634	0.479	0.092	2.16261e-71	3
Calcrl	2.8255e-75	1.4788	0.402	0.066	3.29708e-71	3
Cox7a2l	3.27844e-75	1.20218	0.313	0.039	3.82561e-71	3
Tmem176b	5.6489e-75	1.1712	0.452	0.081	6.5917e-71	3
Syf2	1.37746e-74	1.2337	0.317	0.04	1.60736e-70	3
Elk3	1.43263e-74	1.291	0.405	0.067	1.67174e-70	3
Micos13	3.7538e-74	1.21073	0.309	0.039	4.38031e-70	3
Mfge8	1.14498e-73	1.2198	0.34	0.047	1.33608e-69	3
Ndufb8	1.64225e-73	1.48354	0.367	0.056	1.91635e-69	3
Eif3f	4.60051e-73	0.986851	0.286	0.033	5.36834e-69	3
D8Ertd738e	5.46335e-73	1.28975	0.429	0.075	6.37518e-69	3
Timm10b	1.29734e-72	0.849521	0.263	0.028	1.51386e-68	3
Mal	1.46704e-72	1.60371	0.34	0.05	1.71189e-68	3
Cox4i1	3.17487e-72	1.56719	0.695	0.197	3.70475e-68	3
Plpp1	1.09726e-71	2.38405	0.591	0.183	1.28039e-67	3
Lims2	8.15679e-71	1.27142	0.394	0.066	9.51816e-67	3
Tbca	1.16166e-70	1.09377	0.336	0.048	1.35554e-66	3
Mrpl52	2.18818e-70	1.17828	0.309	0.041	2.55338e-66	3
Pebp1	2.57034e-70	1.12793	0.363	0.056	2.99933e-66	3
Hspg2	3.75903e-70	1.1428	0.351	0.053	4.38641e-66	3
Mrps24	9.46134e-70	0.968943	0.266	0.03	1.10404e-65	3
Npc2	2.18452e-69	1.10905	0.297	0.038	2.54912e-65	3
Pde2a	3.01173e-69	0.978843	0.274	0.032	3.51439e-65	3
Atpif1	6.75838e-68	1.29573	0.44	0.084	7.88635e-64	3
Hnrnpf	1.48118e-67	0.954437	0.367	0.059	1.72839e-63	3
Cbfa2t3	2.07629e-67	1.08516	0.266	0.032	2.42283e-63	3
Mndal	2.83033e-66	1.26387	0.371	0.063	3.30271e-62	3
Spcs2	2.94178e-66	0.966657	0.263	0.031	3.43276e-62	3
Rtraf	7.69811e-66	0.892355	0.251	0.028	8.98293e-62	3
Cyyr1	2.17244e-65	1.48362	0.436	0.089	2.53502e-61	3
Tnfsf10	3.74864e-65	1.33136	0.332	0.053	4.37429e-61	3
Rheb	4.86746e-65	1.04415	0.363	0.06	5.67984e-61	3
Fzd4	7.25069e-65	0.890923	0.27	0.033	8.46083e-61	3
Gas5	1.3227e-64	1.22809	0.405	0.076	1.54346e-60	3
Anp32a	2.13234e-64	1.10162	0.347	0.056	2.48823e-60	3
Ftl1	2.20295e-64	1.43636	0.815	0.314	2.57062e-60	3
Snx3	2.40408e-64	1.24607	0.386	0.07	2.80532e-60	3
Marcks	3.83887e-64	1.25846	0.313	0.047	4.47958e-60	3
Ccnd2	6.77831e-64	1.04692	0.251	0.029	7.90961e-60	3
H2afv	1.25551e-63	1.06058	0.301	0.043	1.46505e-59	3
Hsp90ab1	1.58592e-63	1.47746	0.714	0.237	1.85061e-59	3
Arf1	2.01446e-63	1.02743	0.382	0.068	2.35067e-59	3
Pdgfb	2.80556e-63	1.06821	0.293	0.041	3.27381e-59	3
Dpysl2	3.34098e-63	0.891991	0.259	0.032	3.89859e-59	3
Myl6	1.01444e-62	1.53804	0.792	0.312	1.18375e-58	3
Rbms2	1.38027e-62	1.4805	0.467	0.105	1.61063e-58	3
Clic5	4.41123e-62	1.42763	0.417	0.085	5.14746e-58	3
Vdac2	5.67915e-62	1.00119	0.32	0.049	6.62699e-58	3
Pttg1	1.23401e-61	0.972709	0.259	0.032	1.43997e-57	3
Hnrnpk	3.40617e-61	1.08092	0.413	0.081	3.97465e-57	3
Klf7	1.99737e-60	1.10246	0.44	0.092	2.33073e-56	3
Set	2.48085e-60	0.975869	0.274	0.038	2.8949e-56	3
Saraf	3.10952e-60	0.904095	0.29	0.041	3.6285e-56	3
Ndufa11	3.66315e-60	1.03554	0.293	0.043	4.27453e-56	3
Atp5g1	6.53138e-60	1.65361	0.44	0.094	7.62146e-56	3
Morf4l1	1.79411e-59	1.01808	0.39	0.075	2.09355e-55	3
Sh3glb1	3.89167e-59	1.18651	0.436	0.093	4.54119e-55	3
Shisa5	1.10701e-58	0.844133	0.282	0.04	1.29177e-54	3
Eif3h	3.11239e-58	1.00282	0.32	0.052	3.63185e-54	3
Rnasek	7.60434e-58	1.04426	0.317	0.052	8.8735e-54	3
Mef2c	9.11275e-58	1.22553	0.402	0.083	1.06337e-53	3
Prdx1	1.26645e-57	1.2139	0.571	0.157	1.47782e-53	3
Bax	1.5228e-57	0.698333	0.27	0.038	1.77696e-53	3
Reep5	1.60677e-57	0.95689	0.286	0.043	1.87494e-53	3
Fis1	1.73869e-57	0.970694	0.375	0.071	2.02888e-53	3
Msn	2.16599e-57	1.02149	0.394	0.078	2.52749e-53	3
Atp5g3	2.38629e-57	1.38541	0.351	0.065	2.78456e-53	3
Ndufb2	4.05541e-57	1.22601	0.282	0.042	4.73226e-53	3
Ets1	5.69999e-57	1.01313	0.378	0.073	6.65132e-53	3
Serpinb6a	6.6915e-57	1.0952	0.286	0.043	7.80831e-53	3
Atp6v0e	1.11719e-56	0.915698	0.328	0.056	1.30365e-52	3
Gpx4	1.67838e-56	1.29646	0.637	0.194	1.9585e-52	3
Ushbp1	6.40207e-56	0.788706	0.286	0.043	7.47058e-52	3
Mtch1	8.75452e-56	1.06295	0.394	0.081	1.02156e-51	3
Vdac3	3.44386e-55	0.998125	0.274	0.041	4.01864e-51	3
Tmed9	3.73185e-55	0.99173	0.297	0.048	4.3547e-51	3
Ywhaq	5.6999e-55	1.06607	0.398	0.083	6.65121e-51	3
Smpdl3a	1.22334e-54	1.00274	0.251	0.035	1.42751e-50	3
Rdx	5.15092e-54	1.37548	0.552	0.16	6.01061e-50	3
Atp5k	1.25863e-53	1.59507	0.467	0.116	1.4687e-49	3
Taldo1	2.32179e-53	0.889749	0.286	0.046	2.7093e-49	3
Uqcrq	2.40732e-53	1.19057	0.502	0.129	2.80911e-49	3
Tpm3	3.12922e-53	1.02908	0.425	0.096	3.65149e-49	3
Atxn7l3b	3.87795e-53	0.758893	0.301	0.05	4.52518e-49	3
Tspan12	4.15541e-53	0.750067	0.266	0.04	4.84895e-49	3
Dnajc8	4.50439e-53	0.977778	0.274	0.043	5.25617e-49	3
Ndufab1	9.2948e-53	1.13508	0.263	0.04	1.08461e-48	3
Itgb1	2.71531e-52	1.21474	0.51	0.139	3.1685e-48	3
Pdia6	2.83081e-52	1.04018	0.266	0.041	3.30327e-48	3
4931406P16Rik	5.54822e-52	1.03054	0.375	0.077	6.47422e-48	3
Aplp2	5.63875e-52	1.11398	0.506	0.135	6.57986e-48	3
Eif3e	1.94328e-51	0.86668	0.27	0.043	2.26761e-47	3
Rpl10a	2.38668e-51	0.997415	0.668	0.208	2.78501e-47	3
Oaz2	2.79768e-51	0.887486	0.259	0.039	3.26461e-47	3
Rpsa	4.12491e-51	1.2454	0.699	0.255	4.81336e-47	3
Rapgef5	4.23039e-51	1.07273	0.336	0.065	4.93644e-47	3
Gnb1	4.23172e-51	1.01196	0.459	0.114	4.93799e-47	3
Atp5f1	7.25784e-51	1.29418	0.371	0.079	8.46918e-47	3
Heg1	1.13089e-50	1.23861	0.425	0.103	1.31964e-46	3
Ece1	1.18166e-50	0.990755	0.347	0.07	1.37888e-46	3
Ndufs6	2.56368e-50	1.18152	0.317	0.059	2.99156e-46	3
Rpl5	3.81651e-50	1.02146	0.471	0.118	4.45348e-46	3
Capns1	3.96818e-50	0.838204	0.363	0.073	4.63047e-46	3
Ahnak	4.17756e-50	1.25833	0.417	0.098	4.8748e-46	3
Clta	5.91295e-50	0.860074	0.378	0.081	6.89982e-46	3
Ndufa3	6.91205e-50	1.10965	0.324	0.063	8.06567e-46	3
Sri	7.81877e-50	1.03876	0.305	0.055	9.12373e-46	3
Trir	1.31528e-49	0.863396	0.363	0.075	1.5348e-45	3
Tmem140	1.6154e-49	0.781009	0.255	0.039	1.88502e-45	3
Eef1g	2.09151e-49	0.846518	0.34	0.067	2.44058e-45	3
Rpl13a	6.22323e-49	1.21893	0.707	0.255	7.26189e-45	3
Atp5c1	7.62593e-49	0.878597	0.432	0.103	8.89869e-45	3
Uqcr10	7.79722e-49	1.28955	0.49	0.131	9.09858e-45	3
Atp5b	1.27654e-48	1.21894	0.579	0.175	1.4896e-44	3
Txnl1	2.74488e-48	0.676135	0.255	0.04	3.203e-44	3
Pcdh17	3.23865e-48	1.19481	0.301	0.056	3.77918e-44	3
Zfp36l1	3.78047e-48	0.968279	0.371	0.081	4.41143e-44	3
Psmb2	1.87856e-47	0.893182	0.27	0.046	2.19209e-43	3
Zfp706	8.37638e-47	0.876966	0.297	0.055	9.7744e-43	3
Lamp1	2.68355e-46	0.896951	0.452	0.116	3.13144e-42	3
Myo1c	3.70777e-46	0.865233	0.324	0.065	4.3266e-42	3
F11r	4.37167e-46	1.02685	0.367	0.084	5.1013e-42	3
Pttg1ip	4.64451e-46	0.745235	0.305	0.058	5.41968e-42	3
Capza2	4.66276e-46	0.852631	0.255	0.042	5.44098e-42	3
Jund	4.67831e-46	1.19248	0.324	0.068	5.45912e-42	3
Ncl	6.56323e-46	1.08283	0.32	0.065	7.65864e-42	3
Ndufb5	6.8157e-46	1.05182	0.301	0.058	7.95324e-42	3
Tmem176a	1.26459e-45	0.889866	0.421	0.103	1.47565e-41	3
Bnip2	2.44908e-45	0.980539	0.301	0.058	2.85783e-41	3
Bnip3l	2.65078e-45	0.828135	0.297	0.057	3.0932e-41	3
Tjp1	3.03692e-45	0.764059	0.405	0.097	3.54378e-41	3
Polr1d	4.20271e-45	0.743067	0.293	0.055	4.90414e-41	3
Cpd	4.54047e-45	0.751441	0.328	0.068	5.29827e-41	3
Park7	6.04198e-45	0.910029	0.417	0.103	7.05038e-41	3
Col4a1	7.03096e-45	0.867536	0.514	0.147	8.20443e-41	3
Hecw2	1.17875e-44	0.918553	0.305	0.06	1.37548e-40	3
Fam117b	1.25587e-44	1.0852	0.429	0.113	1.46548e-40	3
Ubxn1	2.65007e-44	0.790356	0.266	0.047	3.09236e-40	3
Snrk	2.89733e-44	0.815732	0.332	0.071	3.3809e-40	3
Chmp4b	3.97524e-44	0.833726	0.255	0.044	4.63871e-40	3
Itpkb	7.42024e-44	0.980672	0.378	0.091	8.65868e-40	3
Eef1d	7.94804e-44	0.75571	0.363	0.082	9.27456e-40	3
Pdcd10	1.42305e-43	0.8515	0.251	0.043	1.66056e-39	3
Tmed10	1.99933e-43	0.799907	0.317	0.066	2.33301e-39	3
Serbp1	2.22384e-43	0.9862	0.413	0.107	2.595e-39	3
Gas6	3.51901e-43	0.926797	0.494	0.143	4.10633e-39	3
Gm10076	5.58638e-43	1.07851	0.255	0.046	6.51875e-39	3
Bcam	6.96334e-43	0.644331	0.278	0.052	8.12552e-39	3
Ppp1ca	7.42815e-43	0.71163	0.351	0.079	8.66791e-39	3
Tmed2	1.76995e-42	0.743289	0.251	0.044	2.06536e-38	3
Ssb	1.92584e-42	0.767342	0.282	0.054	2.24726e-38	3
Fmnl3	2.30381e-42	0.691416	0.259	0.046	2.68832e-38	3
Eif4h	2.95175e-42	0.713047	0.263	0.048	3.4444e-38	3
Ctsz	3.05436e-42	0.810967	0.278	0.053	3.56413e-38	3
Rnf144a	5.70721e-42	0.700106	0.263	0.048	6.65974e-38	3
Mgll	8.69539e-42	1.06654	0.367	0.09	1.01467e-37	3
Nucks1	2.57486e-41	0.748684	0.305	0.064	3.00461e-37	3
Psma3	6.25479e-41	0.73993	0.378	0.092	7.29872e-37	3
Dysf	9.49698e-41	0.823991	0.359	0.086	1.1082e-36	3
Hspa5	1.27984e-40	0.941101	0.363	0.089	1.49344e-36	3
Gstm1	1.3381e-40	1.08379	0.263	0.05	1.56143e-36	3
Mxd4	1.98307e-40	0.833705	0.375	0.093	2.31404e-36	3
Calr	3.32021e-40	0.811062	0.324	0.072	3.87435e-36	3
Nrp1	3.8727e-40	1.59353	0.629	0.296	4.51905e-36	3
Hspe1	4.20589e-40	0.85871	0.263	0.051	4.90786e-36	3
Klf13	9.74875e-40	0.610331	0.301	0.064	1.13758e-35	3
Rapgef4	1.07885e-39	0.839807	0.421	0.116	1.25891e-35	3
Erg	1.19309e-39	0.712598	0.282	0.057	1.39221e-35	3
Rab11a	6.12923e-39	0.83631	0.263	0.052	7.1522e-35	3
Dync1i2	1.09932e-38	1.02431	0.382	0.102	1.2828e-34	3
Arhgdia	4.00174e-38	0.736724	0.371	0.095	4.66963e-34	3
Arpc2	6.80764e-38	0.817742	0.436	0.125	7.94384e-34	3
Sumo1	7.29259e-38	0.738093	0.29	0.062	8.50973e-34	3
Ltbp1	8.60058e-38	0.905561	0.301	0.068	1.0036e-33	3
Rap1b	9.27454e-38	0.930758	0.34	0.084	1.08225e-33	3
Mrps21	1.30046e-37	0.826219	0.286	0.062	1.51751e-33	3
Ndufs7	1.41943e-37	0.841969	0.351	0.088	1.65634e-33	3
Cope	2.53228e-37	0.769655	0.251	0.049	2.95492e-33	3
Psma1	1.8183e-36	0.528352	0.259	0.052	2.12178e-32	3
Clic4	3.75798e-36	0.906888	0.486	0.154	4.38519e-32	3
Lats2	4.03569e-35	0.528389	0.266	0.056	4.70925e-31	3
Rhoj	7.10776e-35	0.686829	0.263	0.056	8.29405e-31	3
Sod1	2.1457e-34	0.796268	0.425	0.126	2.50382e-30	3
Dbi	2.18482e-34	0.956005	0.398	0.116	2.54947e-30	3
Rps15	2.35006e-34	0.865142	0.645	0.251	2.74229e-30	3
Pdia3	2.44688e-34	0.836298	0.367	0.101	2.85526e-30	3
Rab14	4.64939e-34	0.704728	0.367	0.1	5.42537e-30	3
Ech1	4.94128e-34	0.603082	0.286	0.065	5.76597e-30	3
Eif4g2	5.28479e-34	0.737679	0.459	0.143	6.16682e-30	3
Arf4	1.89571e-33	0.591309	0.286	0.066	2.2121e-29	3
Pfdn1	4.86793e-33	0.715352	0.259	0.057	5.68038e-29	3
Sypl	9.1095e-33	0.50866	0.317	0.079	1.06299e-28	3
Brk1	1.8412e-32	0.746051	0.255	0.057	2.14849e-28	3
Hsp90b1	1.87736e-32	0.886103	0.471	0.16	2.1907e-28	3
Rab2a	2.47465e-32	0.678908	0.475	0.155	2.88767e-28	3
Zfand5	2.55598e-32	0.718005	0.313	0.08	2.98257e-28	3
Eif2s2	3.23148e-32	0.743106	0.313	0.08	3.77081e-28	3
Sec62	4.53252e-32	0.72479	0.502	0.172	5.289e-28	3
Ctnnb1	5.89592e-32	0.803749	0.405	0.123	6.87995e-28	3
Ctsb	6.84271e-32	0.541324	0.32	0.083	7.98476e-28	3
Ckb	3.52268e-31	1.2068	0.259	0.062	4.11061e-27	3
Ptms	3.63883e-31	0.981022	0.475	0.167	4.24615e-27	3
Tle5	7.19526e-31	0.803605	0.413	0.13	8.39615e-27	3
Chd9	8.88559e-31	0.514812	0.575	0.775	1.03686e-26	3
Meis2	1.02221e-30	1.47602	0.637	0.358	1.19282e-26	3
Psmd7	2.51462e-30	0.611367	0.305	0.079	2.93431e-26	3
Mdh2	4.14271e-30	0.684111	0.266	0.064	4.83412e-26	3
Bmpr2	5.78464e-30	0.748962	0.405	0.13	6.75009e-26	3
Atp6v0c	8.26607e-30	0.746514	0.409	0.13	9.64568e-26	3
Prkch	9.70755e-30	0.57824	0.34	0.096	1.13277e-25	3
Slc25a3	1.21329e-29	0.880486	0.417	0.136	1.41579e-25	3
Hspa8	1.31281e-29	0.930186	0.602	0.244	1.53192e-25	3
Atp5d	4.06967e-29	0.886296	0.417	0.137	4.7489e-25	3
Tgfbr2	1.61343e-28	0.555091	0.317	0.087	1.88271e-24	3
Arpp19	2.64198e-28	0.713996	0.371	0.114	3.08292e-24	3
Atp5o	3.26792e-28	0.792621	0.355	0.109	3.81333e-24	3
Srsf3	4.14341e-28	0.519094	0.432	0.142	4.83495e-24	3
Arpc4	1.58249e-27	0.538509	0.278	0.073	1.84661e-23	3
Xiap	2.68165e-27	0.660286	0.344	0.104	3.12922e-23	3
Sh3bp5	2.88347e-27	0.865629	0.324	0.097	3.36472e-23	3
Tm9sf3	4.04891e-27	0.526151	0.293	0.08	4.72467e-23	3
Tmbim4	4.55318e-27	0.589939	0.27	0.07	5.31311e-23	3
Cyc1	5.46826e-27	0.874139	0.266	0.07	6.38092e-23	3
Micos10	5.85094e-27	0.830318	0.317	0.092	6.82747e-23	3
Cnn3	6.74854e-27	0.4087	0.29	0.078	7.87487e-23	3
Fgd5	8.88736e-27	0.453898	0.263	0.067	1.03707e-22	3
Stard8	9.42081e-27	0.545309	0.282	0.075	1.09931e-22	3
Hip1	1.49557e-26	0.666371	0.328	0.098	1.74518e-22	3
Smad7	1.93743e-26	0.619066	0.293	0.082	2.26078e-22	3
Ctsd	2.24089e-26	0.567289	0.355	0.11	2.6149e-22	3
Paip2	2.77577e-26	0.481737	0.313	0.09	3.23904e-22	3
Selenop	2.8917e-26	0.745355	0.313	0.092	3.37433e-22	3
Ube2i	3.02954e-26	0.391075	0.278	0.074	3.53517e-22	3
Tapbp	3.93094e-26	0.74509	0.263	0.07	4.58701e-22	3
Adgrl2	5.07595e-26	0.690827	0.402	0.138	5.92313e-22	3
Ywhae	6.79311e-26	0.497144	0.402	0.134	7.92688e-22	3
Samd12	1.02131e-25	0.94681	0.351	0.117	1.19177e-21	3
Metap2	1.28198e-25	0.888658	0.259	0.07	1.49595e-21	3
Nfic	4.31313e-25	0.594447	0.274	0.076	5.033e-21	3
Prdx5	4.35437e-25	1.37959	0.297	0.091	5.08112e-21	3
Rtn4	1.07854e-24	0.625301	0.29	0.084	1.25854e-20	3
Timm13	1.44657e-24	0.598023	0.27	0.076	1.688e-20	3
Tmem30a	1.49444e-24	0.547135	0.328	0.102	1.74386e-20	3
Mcc	1.56591e-24	0.72472	0.398	0.14	1.82726e-20	3
Ldb2	1.67845e-24	0.857203	0.471	0.19	1.95858e-20	3
Inpp4b	1.75035e-24	0.642792	0.355	0.116	2.04248e-20	3
Ubc	2.43752e-24	0.675828	0.591	0.254	2.84434e-20	3
Bsg	2.73299e-24	0.670568	0.413	0.145	3.18913e-20	3
Tcf4	4.19664e-24	0.86694	0.653	0.333	4.89705e-20	3
Eif5	1.42055e-23	0.591315	0.378	0.129	1.65764e-19	3
Slc38a2	2.37185e-23	0.598454	0.266	0.077	2.76771e-19	3
Eef2	2.80028e-23	0.524772	0.409	0.146	3.26765e-19	3
Ebf1	3.62599e-23	0.887039	0.564	0.265	4.23117e-19	3
Luzp1	4.68031e-23	0.554209	0.378	0.131	5.46146e-19	3
St13	6.2892e-23	0.706831	0.32	0.103	7.33887e-19	3
Asap2	7.7195e-23	0.534797	0.29	0.088	9.00788e-19	3
Tmbim6	8.78278e-23	0.514945	0.456	0.175	1.02486e-18	3
Esd	9.40868e-23	0.611467	0.251	0.071	1.0979e-18	3
Dnaja1	1.00806e-22	0.738373	0.305	0.097	1.1763e-18	3
Fbxl7	1.11357e-22	0.747713	0.347	0.121	1.29943e-18	3
Gpx1	1.1492e-22	0.615263	0.324	0.106	1.341e-18	3
Dctn2	1.41809e-22	0.487423	0.274	0.081	1.65477e-18	3
Pkm	3.7304e-22	0.535574	0.278	0.084	4.353e-18	3
Klf3	9.69001e-22	0.519752	0.286	0.089	1.13073e-17	3
Cald1	1.09504e-21	0.631523	0.475	0.194	1.27781e-17	3
Dnajc3	1.10316e-21	0.432227	0.266	0.079	1.28727e-17	3
Cyba	1.22055e-21	0.442215	0.344	0.116	1.42426e-17	3
Cyth3	1.38533e-21	0.451973	0.259	0.076	1.61654e-17	3
Hnrnpa3	2.02734e-21	0.678634	0.34	0.118	2.36571e-17	3
Sp100	2.52242e-21	0.599868	0.266	0.081	2.94341e-17	3
Fli1	3.10484e-21	0.575776	0.375	0.137	3.62304e-17	3
Ptges3	3.14102e-21	0.426061	0.266	0.079	3.66525e-17	3
Ccdc12	7.10648e-21	0.391808	0.251	0.073	8.29256e-17	3
Mef2a	7.2721e-21	0.598068	0.394	0.149	8.48581e-17	3
B3gnt2	1.89464e-20	0.325337	0.29	0.092	2.21086e-16	3
Csnk2a1	2.42741e-20	0.372137	0.328	0.111	2.83255e-16	3
Arhgap29	4.22623e-20	0.503946	0.382	0.144	4.93159e-16	3
Ndufv2	5.88138e-20	0.611141	0.263	0.083	6.86298e-16	3
Rsrp1	8.14452e-20	0.451843	0.502	0.212	9.50384e-16	3
Vamp8	9.21044e-20	0.432916	0.278	0.089	1.07477e-15	3
Rap1a	3.63913e-19	0.54016	0.313	0.109	4.2465e-15	3
Ldha	5.86545e-19	0.395128	0.282	0.093	6.8444e-15	3
Sdhb	6.40735e-19	0.708292	0.274	0.091	7.47673e-15	3
Zeb1	9.39807e-19	0.558766	0.297	0.103	1.09666e-14	3
Dlc1	1.24931e-18	0.652801	0.502	0.229	1.45782e-14	3
Ndufv3	1.82107e-18	0.507267	0.309	0.11	2.125e-14	3
Ttc28	1.8277e-18	0.411851	0.324	0.116	2.13275e-14	3
Sptbn1	2.214e-18	0.80537	0.664	0.371	2.58352e-14	3
St6galnac3	2.24684e-18	0.507781	0.378	0.149	2.62184e-14	3
Nfe2l2	2.58581e-18	0.395693	0.313	0.11	3.01738e-14	3
Tmem234	2.7622e-18	0.460663	0.305	0.107	3.22321e-14	3
Cdc14a	3.55012e-18	0.47797	0.286	0.099	4.14263e-14	3
Pcbp2	5.14804e-18	0.471639	0.351	0.134	6.00724e-14	3
Sema6a	5.40197e-18	0.268888	0.305	0.107	6.30356e-14	3
Ptprm	1.05461e-17	0.593336	0.483	0.219	1.23063e-13	3
Mbd2	1.35804e-17	0.306648	0.293	0.102	1.58469e-13	3
Pitpna	1.5653e-17	0.523596	0.274	0.095	1.82655e-13	3
Nmt1	7.93748e-17	0.289083	0.27	0.092	9.26224e-13	3
Map4k4	8.57449e-17	0.437336	0.266	0.092	1.00056e-12	3
Tln1	8.76384e-17	0.401339	0.297	0.108	1.02265e-12	3
Reep3	8.78025e-17	0.576877	0.347	0.14	1.02457e-12	3
Gna11	1.51669e-16	0.305161	0.255	0.085	1.76983e-12	3
Mpc1	1.76655e-16	0.480509	0.313	0.118	2.06138e-12	3
Rnf130	1.80428e-16	0.333123	0.29	0.103	2.10542e-12	3
Actn4	1.8525e-16	0.401819	0.459	0.2	2.16168e-12	3
Cyb5a	2.61188e-16	0.421421	0.444	0.194	3.0478e-12	3
Limch1	2.68305e-16	0.442193	0.475	0.214	3.13085e-12	3
Zfhx3	3.51729e-16	0.450789	0.386	0.159	4.10433e-12	3
Syne1	5.5068e-16	0.578973	0.436	0.197	6.42588e-12	3
Psap	5.5119e-16	0.276672	0.506	0.226	6.43184e-12	3
App	6.81033e-16	0.546745	0.707	0.412	7.94698e-12	3
Fry	7.27435e-16	0.415667	0.293	0.108	8.48843e-12	3
Ndfip1	1.23646e-15	0.318331	0.347	0.138	1.44283e-11	3
Eif4a1	1.29991e-15	0.359938	0.263	0.093	1.51686e-11	3
Tspan9	1.31557e-15	0.413005	0.398	0.168	1.53514e-11	3
Grn	1.98121e-15	0.251234	0.259	0.091	2.31187e-11	3
Ptbp3	3.32153e-15	0.372511	0.317	0.124	3.8759e-11	3
Dkk2	4.48581e-15	0.675411	0.286	0.112	5.23449e-11	3
Fermt2	7.96455e-15	0.347892	0.378	0.16	9.29383e-11	3
Atp6v1e1	1.04968e-14	0.408748	0.286	0.108	1.22487e-10	3
Csde1	2.25131e-14	0.404581	0.266	0.1	2.62705e-10	3
Chrm3	2.82389e-14	0.641789	0.413	0.2	3.2952e-10	3
Dip2b	4.14796e-14	0.289081	0.27	0.102	4.84026e-10	3
Tsc22d1	4.64498e-14	0.422337	0.417	0.193	5.42023e-10	3
Sqstm1	5.73808e-14	0.303208	0.286	0.112	6.69576e-10	3
Map4	5.9915e-14	0.364772	0.301	0.12	6.99148e-10	3
Ywhaz	1.15603e-13	0.372404	0.382	0.171	1.34897e-09	3
Qk	1.16734e-13	0.33221	0.456	0.213	1.36216e-09	3
Mier1	1.90615e-13	0.296954	0.282	0.112	2.22429e-09	3
Sarnp	2.18177e-13	0.303801	0.282	0.111	2.54591e-09	3
Adam10	4.50331e-13	0.262484	0.255	0.097	5.25492e-09	3
Pbx1	5.5107e-13	0.974023	0.734	0.636	6.43043e-09	3
Vapa	6.93303e-13	0.25632	0.259	0.1	8.09015e-09	3
Arl6ip1	1.49717e-12	0.264029	0.347	0.153	1.74705e-08	3
H2afj	1.53288e-12	0.330132	0.274	0.11	1.78871e-08	3
Sipa1l3	2.07965e-12	0.672984	0.255	0.105	2.42675e-08	3
Atp5a1	3.67382e-12	0.535594	0.402	0.189	4.28698e-08	3
Ptp4a2	1.34422e-11	0.407922	0.293	0.128	1.56857e-07	3
Klf9	1.51793e-11	0.307356	0.29	0.125	1.77127e-07	3
Wwtr1	3.77073e-11	0.266542	0.313	0.14	4.40006e-07	3
Aldh2	1.55036e-10	0.256234	0.278	0.123	1.80911e-06	3
Cdk8	1.592e-10	0.558901	0.9	0.691	1.8577e-06	3
Prex2	1.95378e-10	0.26682	0.328	0.153	2.27987e-06	3
Slk	4.82143e-10	0.372539	0.259	0.114	5.62612e-06	3
Id2	5.13131e-10	0.307978	0.263	0.117	5.98773e-06	3
Col4a2	2.71729e-09	0.256641	0.347	0.173	3.17081e-05	3
Fxyd2	2.91976e-09	0.561169	0.417	0.619	3.40707e-05	3
Mpc2	3.9104e-09	0.449106	0.274	0.129	4.56304e-05	3
Mdh1	1.58743e-08	0.528827	0.259	0.124	0.000185237	3
Etl4	2.49798e-08	0.317174	0.382	0.207	0.000291489	3
Hipk2	3.19952e-08	0.364083	0.529	0.321	0.000373352	3
Slc6a6	5.09694e-08	0.375064	0.432	0.253	0.000594761	3
Hsp90aa1	8.21152e-08	0.421635	0.305	0.16	0.000958202	3
C1qa	0	5.03074	0.55	0.007	0	4
Cd52	0	4.64403	0.875	0.005	0	4
Tyrobp	0	4.40554	0.675	0.004	0	4
C1qc	0	4.24453	0.488	0.004	0	4
Wfdc17	0	4.04005	0.525	0.001	0	4
Ctss	0	3.75098	0.637	0.008	0	4
Coro1a	0	2.93054	0.613	0.008	0	4
Cd48	2.85046e-305	1.85341	0.45	0.003	3.3262e-301	4
Lst1	9.83749e-295	2.9796	0.5	0.006	1.14794e-290	4
Fcer1g	1.11577e-279	4.24091	0.65	0.015	1.30199e-275	4
Rac2	1.80073e-279	2.26553	0.412	0.003	2.10127e-275	4
Aif1	6.68624e-275	2.70661	0.4	0.003	7.80218e-271	4
Bcl2a1b	1.46428e-258	1.94426	0.325	0.001	1.70867e-254	4
C1qb	2.00671e-253	4.96825	0.562	0.012	2.34163e-249	4
Lyz2	2.21301e-247	4.22287	0.412	0.004	2.58236e-243	4
Laptm5	2.81475e-237	2.67759	0.588	0.014	3.28453e-233	4
Lsp1	1.77592e-227	2.23534	0.462	0.008	2.07232e-223	4
H2-Eb1	2.0913e-220	6.21892	0.738	0.03	2.44033e-216	4
Ly86	3.10495e-217	2.72352	0.5	0.011	3.62317e-213	4
H2-DMa	1.55641e-212	2.49194	0.462	0.009	1.81618e-208	4
H2-Aa	6.05248e-199	5.67637	0.688	0.03	7.06264e-195	4
Hcls1	7.64945e-190	1.90212	0.338	0.004	8.92614e-186	4
Cd53	8.09802e-183	1.31576	0.288	0.003	9.44958e-179	4
Stk17b	1.80625e-179	1.87468	0.388	0.007	2.10771e-175	4
Mpeg1	1.35663e-172	1.84323	0.288	0.003	1.58306e-168	4
Ifi27l2a	8.28291e-171	3.34118	0.537	0.019	9.66532e-167	4
Selplg	2.08827e-167	1.32573	0.288	0.003	2.4368e-163	4
Spi1	9.27941e-166	1.974	0.362	0.007	1.08281e-161	4
Arhgdib	1.53398e-163	2.17564	0.462	0.014	1.79e-159	4
Ighm	3.71154e-157	2.34306	0.338	0.006	4.33099e-153	4
Mir142hg	4.51136e-156	2.22866	0.45	0.014	5.2643e-152	4
Rps4x	6.50495e-156	3.90519	0.938	0.085	7.59063e-152	4
Rps3a1	2.4255e-153	3.82116	0.963	0.093	2.83032e-149	4
Rpl39	2.82162e-153	4.53503	0.95	0.094	3.29255e-149	4
Ptprc	8.41777e-152	3.08857	0.575	0.026	9.8227e-148	4
Epsti1	2.08984e-148	2.11122	0.438	0.014	2.43863e-144	4
Fxyd5	3.29037e-148	2.79903	0.575	0.027	3.83953e-144	4
Gmfg	3.53146e-148	1.9023	0.362	0.009	4.12086e-144	4
Ms4a6b	1.40088e-147	1.55977	0.325	0.006	1.63469e-143	4
Rpl30	8.13136e-146	3.88791	0.95	0.096	9.48848e-142	4
Rpl27	9.22404e-146	3.67997	0.863	0.075	1.07635e-141	4
Rps5	1.13387e-145	3.84236	0.912	0.088	1.32311e-141	4
Sh3bgrl3	5.96521e-144	3.10767	0.725	0.049	6.9608e-140	4
Cybb	2.17553e-142	2.05581	0.325	0.007	2.53863e-138	4
Cd72	3.45342e-142	1.91762	0.312	0.006	4.02979e-138	4
Rgs10	6.93434e-138	2.39464	0.275	0.004	8.09168e-134	4
Plbd1	1.546e-137	2.15534	0.325	0.007	1.80403e-133	4
Rps23	5.84643e-137	4.04434	0.938	0.103	6.8222e-133	4
Cx3cr1	2.40586e-136	1.72817	0.312	0.006	2.8074e-132	4
Rps7	2.59171e-136	3.85966	0.838	0.076	3.02426e-132	4
Rps13	8.1225e-136	3.88923	0.912	0.096	9.47814e-132	4
Rps28	3.12154e-135	4.38005	0.887	0.091	3.64253e-131	4
Rps9	1.18897e-134	3.81077	0.975	0.115	1.38741e-130	4
Rpl22	2.47249e-133	3.41197	0.887	0.085	2.88515e-129	4
B2m	1.94165e-132	3.31107	0.85	0.076	2.26571e-128	4
Rpl34	2.53673e-131	4.09119	0.875	0.092	2.96011e-127	4
Rps18	1.58901e-130	3.90375	0.925	0.104	1.85422e-126	4
Tmsb4x	3.30717e-130	5.19678	0.988	0.131	3.85913e-126	4
H2-Ab1	7.35277e-130	5.60506	0.662	0.048	8.57995e-126	4
Apbb1ip	8.74905e-130	1.73938	0.388	0.012	1.02093e-125	4
Rps3	1.09433e-129	3.56	0.9	0.094	1.27698e-125	4
Rpl12	2.76049e-129	3.50997	0.838	0.08	3.22121e-125	4
H2-DMb1	3.17294e-129	2.31093	0.35	0.01	3.7025e-125	4
Rpl35a	1.33188e-128	3.95146	0.938	0.11	1.55417e-124	4
Rps16	1.71661e-127	3.67738	0.938	0.107	2.00311e-123	4
Rplp2	2.70934e-123	3.63525	0.925	0.11	3.16153e-119	4
Eef1b2	7.80171e-123	2.85636	0.65	0.046	9.10382e-119	4
Rpl17	9.00504e-123	3.54967	0.938	0.114	1.0508e-118	4
Rps27	2.67151e-122	4.33038	0.963	0.128	3.11738e-118	4
Rpl32	3.33755e-122	4.10487	0.887	0.105	3.89459e-118	4
Rpl35	6.39665e-120	3.50594	0.863	0.092	7.46426e-116	4
Phf11b	9.82313e-120	1.4758	0.275	0.006	1.14626e-115	4
Plek	3.1323e-119	1.67382	0.275	0.006	3.65508e-115	4
Rpl9	9.43795e-119	3.51969	0.925	0.114	1.10131e-114	4
Uba52	3.27193e-117	3.95814	0.95	0.13	3.81802e-113	4
Rps11	5.42236e-117	3.75795	0.9	0.11	6.32735e-113	4
Rps27a	5.69289e-117	3.89247	0.938	0.126	6.64303e-113	4
Rpl27a	7.04122e-117	3.91496	0.95	0.129	8.2164e-113	4
Rps14	3.59086e-116	3.52989	0.925	0.117	4.19017e-112	4
Limd2	7.39042e-116	1.34132	0.262	0.005	8.62388e-112	4
Rps21	9.63701e-116	3.86388	0.938	0.125	1.12454e-111	4
Rps26	5.06889e-115	3.31394	0.838	0.089	5.91489e-111	4
Rpl26	8.68038e-115	3.59532	0.95	0.129	1.01291e-110	4
Cd74	1.00178e-114	6.65379	0.75	0.076	1.16898e-110	4
H2-D1	2.22309e-114	3.07339	0.812	0.079	2.59412e-110	4
Runx1	3.49572e-114	2.0521	0.488	0.025	4.07916e-110	4
Rpl10	1.8857e-113	3.31481	0.875	0.102	2.20042e-109	4
Stap1	3.96808e-112	1.3197	0.288	0.007	4.63036e-108	4
Ubb	1.87398e-110	2.82928	0.825	0.084	2.18675e-106	4
Rps15a	5.42325e-110	3.94437	0.9	0.119	6.32839e-106	4
2410006H16Rik	6.83361e-110	2.30348	0.462	0.024	7.97414e-106	4
Psmb8	3.46708e-108	2.30495	0.525	0.032	4.04574e-104	4
Rps20	3.65249e-108	3.74043	0.925	0.13	4.26209e-104	4
Ifi30	5.33687e-107	1.53103	0.275	0.007	6.2276e-103	4
Rps24	1.50891e-106	4.3365	0.975	0.164	1.76074e-102	4
Rpl7	8.781e-106	2.98434	0.8	0.087	1.02466e-101	4
Slamf9	9.21507e-106	1.56428	0.262	0.006	1.07531e-101	4
Rpl11	2.42464e-105	3.39951	0.925	0.131	2.82931e-101	4
Rps29	3.84867e-104	4.3203	0.988	0.173	4.49101e-100	4
Rpl19	4.3915e-104	3.60168	0.912	0.131	5.12444e-100	4
Pfn1	5.04257e-104	2.67888	0.738	0.072	5.88418e-100	4
Rps12	3.11169e-103	3.33526	0.925	0.135	3.63103e-99	4
Rps10	4.01365e-103	3.62203	0.887	0.124	4.68353e-99	4
Rps25	4.35059e-103	2.95403	0.863	0.105	5.0767e-99	4
Rpl37a	1.47819e-102	3.87856	0.95	0.155	1.7249e-98	4
Rps6	5.662e-100	2.78992	0.688	0.066	6.60699e-96	4
Rpl23	1.61753e-99	3.79116	0.925	0.148	1.8875e-95	4
Rpl36a	5.91542e-97	2.95641	0.713	0.074	6.90271e-93	4
Tmsb10	8.71838e-97	3.65341	0.637	0.059	1.01735e-92	4
Rpl3	1.10444e-95	2.92882	0.863	0.117	1.28877e-91	4
Rpl6	1.10867e-95	3.03341	0.875	0.121	1.29371e-91	4
Rps19	1.17062e-93	3.49165	0.912	0.146	1.36599e-89	4
Rplp0	1.43228e-92	2.94541	0.812	0.105	1.67132e-88	4
Rpl7a	1.03582e-91	2.41751	0.662	0.064	1.2087e-87	4
Tmem258	2.41155e-89	1.75577	0.375	0.019	2.81404e-85	4
Dock11	3.79965e-89	1.4329	0.35	0.016	4.43381e-85	4
Fyb	5.09065e-89	2.5071	0.512	0.039	5.94028e-85	4
Rpl15	3.43916e-87	2.04461	0.45	0.029	4.01316e-83	4
Tomm7	7.5499e-87	2.11345	0.525	0.04	8.80998e-83	4
Ucp2	2.36422e-86	2.10835	0.4	0.023	2.75881e-82	4
Ikzf1	2.77208e-86	1.56926	0.425	0.025	3.23474e-82	4
Gng5	3.09852e-86	2.16127	0.625	0.057	3.61566e-82	4
Ptpn6	3.77356e-86	1.37393	0.25	0.008	4.40336e-82	4
Rack1	9.23792e-86	2.69054	0.75	0.092	1.07797e-81	4
H2afz	2.04224e-85	2.10075	0.525	0.042	2.38309e-81	4
Crip1	3.5924e-85	2.29702	0.525	0.042	4.19198e-81	4
Rplp1	3.66436e-85	3.57728	0.95	0.192	4.27594e-81	4
Efhd2	4.10117e-85	1.61907	0.3	0.012	4.78565e-81	4
Rpl23a	1.01275e-84	2.22687	0.6	0.055	1.18178e-80	4
Rpl22l1	1.10263e-84	2.24117	0.5	0.039	1.28665e-80	4
Rpl18	4.44935e-84	3.00744	0.762	0.102	5.19195e-80	4
Rpl37	5.65975e-84	3.55536	0.912	0.18	6.60436e-80	4
Sec61b	6.00727e-84	1.74004	0.438	0.028	7.00988e-80	4
Rpl18a	6.06859e-84	3.27731	0.938	0.18	7.08144e-80	4
Rpl24	1.5545e-83	2.74453	0.838	0.122	1.81394e-79	4
Snrpg	4.52553e-83	2.09831	0.512	0.041	5.28084e-79	4
Cyth4	3.48618e-82	1.20607	0.3	0.012	4.06803e-78	4
Hspa1b	3.90848e-81	2.44408	0.412	0.026	4.5608e-77	4
Ptpn18	3.96661e-81	2.04764	0.6	0.057	4.62864e-77	4
Emp3	4.15431e-81	1.70431	0.388	0.023	4.84767e-77	4
Ier5	4.63462e-81	1.41727	0.35	0.018	5.40814e-77	4
Lcp1	1.24054e-80	2.21964	0.562	0.051	1.44759e-76	4
Fau	2.19474e-80	3.97176	0.988	0.257	2.56104e-76	4
Srgn	5.23524e-80	2.32701	0.575	0.053	6.109e-76	4
Gm26740	1.6331e-79	1.90358	0.388	0.023	1.90567e-75	4
Gng2	3.13487e-78	1.75989	0.375	0.022	3.65808e-74	4
Psmb9	9.19492e-78	1.87096	0.362	0.021	1.07296e-73	4
Rpl29	1.70423e-77	2.35369	0.725	0.092	1.98866e-73	4
Slfn2	1.88844e-77	1.73141	0.288	0.012	2.20362e-73	4
Ctsc	5.64182e-77	2.08652	0.3	0.014	6.58343e-73	4
Ptpre	1.33078e-75	1.82471	0.3	0.014	1.55289e-71	4
Rpl38	2.65578e-75	3.53039	0.912	0.207	3.09902e-71	4
Btf3	3.28391e-75	1.71811	0.537	0.049	3.832e-71	4
Itga4	5.15077e-75	1.97402	0.35	0.02	6.01043e-71	4
Rpl36	1.33739e-74	3.10748	0.95	0.215	1.5606e-70	4
Calm1	2.90605e-74	2.14359	0.725	0.092	3.39107e-70	4
Dapp1	9.48987e-74	1.2113	0.275	0.012	1.10737e-69	4
Rpl13	1.63226e-73	3.31929	0.963	0.241	1.90469e-69	4
Tpt1	4.47267e-73	3.31649	0.95	0.229	5.21916e-69	4
Eif1	2.25707e-72	2.4847	0.762	0.11	2.63377e-68	4
Fam129a	1.04015e-70	1.83349	0.45	0.036	1.21375e-66	4
Cst3	3.4917e-70	4.03184	0.75	0.125	4.07446e-66	4
Clic1	5.52794e-70	2.21088	0.625	0.074	6.45055e-66	4
Eef1a1	9.21548e-70	2.99684	0.938	0.218	1.07535e-65	4
Rps2	1.31428e-69	2.62405	0.812	0.135	1.53364e-65	4
Irf8	2.39566e-69	1.59565	0.312	0.017	2.79549e-65	4
Arhgap45	6.23437e-69	1.47688	0.412	0.031	7.27489e-65	4
Npc2	1.72752e-68	2.34481	0.488	0.045	2.01585e-64	4
AW112010	3.11323e-68	2.67532	0.338	0.021	3.63282e-64	4
Rpl8	3.44032e-68	2.86713	0.863	0.169	4.01451e-64	4
Serf2	6.29573e-68	2.23183	0.75	0.11	7.34648e-64	4
Otulinl	6.64412e-68	1.35926	0.275	0.013	7.75302e-64	4
Dock2	6.72555e-68	2.43863	0.438	0.037	7.84805e-64	4
Snrpe	5.67432e-67	1.43633	0.375	0.026	6.62137e-63	4
Cyba	1.11746e-66	2.64251	0.738	0.118	1.30396e-62	4
Cmtm7	1.83413e-65	1.28635	0.325	0.02	2.14024e-61	4
Rpl36al	3.38768e-65	1.90412	0.562	0.063	3.95308e-61	4
H2-K1	4.06669e-65	2.50227	0.762	0.125	4.74542e-61	4
Pycard	1.56354e-64	1.24178	0.25	0.011	1.8245e-60	4
Rps8	1.72729e-64	2.70791	0.863	0.179	2.01557e-60	4
Rpl21	1.82811e-64	2.7298	0.863	0.175	2.13322e-60	4
Sem1	3.89886e-64	1.88609	0.562	0.063	4.54958e-60	4
Npm1	6.97825e-64	2.23231	0.462	0.044	8.14292e-60	4
Apobec1	7.35652e-64	1.89449	0.338	0.022	8.58432e-60	4
Ppia	1.45161e-63	2.31634	0.738	0.112	1.69389e-59	4
Prkcb	5.09155e-63	1.75364	0.375	0.028	5.94133e-59	4
H3f3b	5.47041e-63	2.21319	0.7	0.103	6.38342e-59	4
Nsa2	9.34694e-63	1.30086	0.275	0.015	1.09069e-58	4
Adgre1	3.39993e-62	1.59497	0.25	0.012	3.96738e-58	4
Myo1f	2.29708e-61	1.38043	0.288	0.016	2.68046e-57	4
Snrpf	6.68365e-61	1.50122	0.362	0.027	7.79916e-57	4
AY036118	1.54793e-60	2.47623	0.887	0.201	1.80628e-56	4
H3f3a	2.68464e-60	2.29675	0.688	0.102	3.13271e-56	4
Btg2	8.54139e-59	1.6682	0.312	0.021	9.96694e-55	4
Tma7	1.56279e-58	1.7946	0.462	0.047	1.82362e-54	4
Arpc1b	1.93982e-58	1.61878	0.45	0.044	2.26358e-54	4
Ptma	6.10685e-57	2.29689	0.787	0.145	7.12608e-53	4
H2-T23	8.77534e-56	1.74625	0.4	0.037	1.02399e-51	4
Lamtor2	2.21095e-55	1.30821	0.388	0.034	2.57996e-51	4
Hpgd	5.04802e-55	1.88862	0.3	0.021	5.89054e-51	4
Pik3cd	1.00203e-54	1.10579	0.25	0.014	1.16927e-50	4
Psme1	3.90183e-54	1.83861	0.462	0.051	4.55304e-50	4
Cxcl16	8.60532e-54	1.45919	0.25	0.014	1.00415e-49	4
Actb	1.06891e-53	3.08511	0.938	0.333	1.24731e-49	4
Cfl1	3.45652e-53	1.96862	0.475	0.055	4.03341e-49	4
Trmt112	9.33667e-53	1.25769	0.288	0.02	1.0895e-48	4
Mafb	1.50442e-52	1.07019	0.25	0.015	1.75551e-48	4
Hnrnpa0	1.52226e-52	1.32	0.325	0.025	1.77633e-48	4
Rpl41	3.08456e-52	2.72509	0.912	0.305	3.59937e-48	4
Fth1	4.44982e-52	3.26474	0.95	0.325	5.1925e-48	4
Lgals3	7.26929e-52	1.90722	0.262	0.017	8.48253e-48	4
Hspa1a	1.09388e-51	2.51751	0.338	0.029	1.27645e-47	4
Clta	2.75726e-51	1.82524	0.6	0.089	3.21745e-47	4
Arpc3	3.43697e-51	1.66325	0.475	0.056	4.0106e-47	4
Actr3	4.04524e-51	1.7345	0.613	0.093	4.72039e-47	4
Btg1	8.84967e-51	2.27107	0.412	0.045	1.03267e-46	4
Ciita	1.11047e-50	1.06826	0.275	0.018	1.2958e-46	4
Sec61g	1.16564e-50	1.86334	0.438	0.049	1.36018e-46	4
Unc93b1	1.39887e-50	1.90523	0.4	0.041	1.63235e-46	4
Jund	1.92838e-50	1.59627	0.55	0.074	2.25023e-46	4
Junb	2.36432e-50	1.56694	0.262	0.017	2.75893e-46	4
Tspo	9.42724e-50	1.87707	0.412	0.044	1.10006e-45	4
Creg1	9.6207e-50	1.3107	0.262	0.017	1.12264e-45	4
Cap1	1.95781e-48	1.33596	0.4	0.042	2.28457e-44	4
Nop10	3.01765e-48	1.14076	0.325	0.028	3.52129e-44	4
Sub1	7.25755e-48	1.77665	0.375	0.038	8.46884e-44	4
St8sia4	9.81242e-48	1.21747	0.25	0.016	1.14501e-43	4
Rpsa	1.52223e-47	2.57365	0.887	0.269	1.77629e-43	4
Supt4a	3.06256e-47	1.21883	0.275	0.02	3.57371e-43	4
Rpl31	3.43182e-47	1.90283	0.65	0.113	4.00459e-43	4
Ost4	5.96574e-47	1.35537	0.362	0.035	6.96142e-43	4
Krtcap2	6.30978e-47	1.40019	0.375	0.038	7.36288e-43	4
Snu13	8.56348e-46	1.28957	0.262	0.019	9.99272e-42	4
Atp5e	1.42515e-45	1.85361	0.662	0.121	1.66301e-41	4
Eif3f	2.03608e-45	1.48184	0.388	0.042	2.3759e-41	4
Hmgb2	1.29876e-44	1.59453	0.312	0.028	1.51553e-40	4
Jpt1	1.81822e-44	1.29608	0.312	0.028	2.12168e-40	4
Rpl4	3.30667e-44	1.70753	0.5	0.072	3.85855e-40	4
Oaz1	3.43535e-44	1.66959	0.462	0.062	4.00871e-40	4
Ubl5	3.80074e-44	1.49828	0.425	0.051	4.43509e-40	4
Arhgap15	1.76551e-43	2.12748	0.562	0.095	2.06017e-39	4
Sec11c	3.17808e-43	0.905847	0.3	0.026	3.7085e-39	4
Pomp	3.32492e-43	1.15832	0.388	0.043	3.87984e-39	4
Uqcrh	3.48185e-43	1.70139	0.613	0.108	4.06297e-39	4
Rpl14	1.07707e-42	2.00993	0.6	0.111	1.25683e-38	4
Rpl10a	1.16622e-42	2.13889	0.812	0.224	1.36086e-38	4
Naca	1.33983e-42	1.87545	0.55	0.093	1.56345e-38	4
Rps17	1.65499e-42	1.69949	0.6	0.105	1.93121e-38	4
Bst2	2.33464e-42	1.78625	0.35	0.037	2.72429e-38	4
Apoe	3.27871e-42	4.45552	0.537	0.099	3.82592e-38	4
Abracl	4.07739e-42	1.51148	0.275	0.023	4.75791e-38	4
Anp32b	4.52509e-42	1.16727	0.362	0.039	5.28032e-38	4
Pfdn5	5.72202e-42	1.53938	0.575	0.096	6.67702e-38	4
Rab8b	8.60252e-42	1.43889	0.388	0.045	1.00383e-37	4
Capza2	2.01484e-41	1.36813	0.4	0.048	2.35112e-37	4
Tmem50a	2.10295e-41	1.226	0.388	0.045	2.45393e-37	4
Psme2	2.31809e-41	1.22116	0.288	0.025	2.70497e-37	4
Cdc42	2.87594e-41	1.52589	0.6	0.106	3.35594e-37	4
Psenen	4.53141e-41	1.24729	0.3	0.028	5.28771e-37	4
Cox7a2l	7.20849e-41	1.38961	0.4	0.049	8.41159e-37	4
Dynll1	1.13744e-40	1.22645	0.4	0.048	1.32728e-36	4
Dock10	1.86037e-40	1.64533	0.525	0.084	2.17087e-36	4
Ndufb1-ps	5.97077e-40	1.45916	0.4	0.05	6.96729e-36	4
Ckb	3.21894e-39	2.13313	0.45	0.066	3.75618e-35	4
Myl12a	5.34172e-39	1.53874	0.375	0.046	6.23325e-35	4
Prex1	5.52695e-39	1.17467	0.3	0.029	6.4494e-35	4
Ctsz	5.55044e-39	1.88169	0.425	0.06	6.47681e-35	4
Atp6v1f	5.58982e-39	1.2448	0.4	0.05	6.52276e-35	4
Mrpl52	5.1269e-37	1.36807	0.388	0.051	5.98258e-33	4
Actr2	1.49103e-36	1.29428	0.488	0.077	1.73989e-32	4
Arpc5	1.98282e-36	1.33313	0.362	0.045	2.31376e-32	4
Selenok	3.37007e-36	1.27586	0.35	0.042	3.93253e-32	4
Vps28	5.53087e-36	1.00485	0.288	0.029	6.45397e-32	4
Arf5	1.07071e-35	1.33425	0.412	0.059	1.24941e-31	4
Myl12b	2.76067e-35	1.47217	0.525	0.094	3.22143e-31	4
Ppib	3.40059e-35	1.23826	0.45	0.068	3.96815e-31	4
Rpl28	3.52489e-35	1.92659	0.863	0.313	4.11319e-31	4
Cox7c	1.16061e-34	1.41462	0.575	0.109	1.35431e-30	4
9930111J21Rik2	4.43821e-34	1.00413	0.288	0.031	5.17894e-30	4
Elob	5.73298e-34	1.66814	0.45	0.073	6.68982e-30	4
Ssr4	8.26966e-34	1.57834	0.3	0.034	9.64986e-30	4
Hypk	9.40555e-34	1.04394	0.325	0.039	1.09753e-29	4
Rap1b	1.05393e-33	1.40067	0.512	0.092	1.22983e-29	4
Shisa5	4.89817e-33	1.21562	0.362	0.049	5.71567e-29	4
Gas5	7.56973e-33	1.77345	0.488	0.088	8.83311e-29	4
Edf1	9.08197e-33	1.28398	0.425	0.066	1.05977e-28	4
Rnaset2a	2.06777e-32	1.08374	0.35	0.047	2.41289e-28	4
Rpl13a	4.12629e-32	2.06243	0.787	0.272	4.81497e-28	4
Rdm1	5.27361e-32	1.08885	0.275	0.03	6.15377e-28	4
Eif3k	5.84649e-32	1.06982	0.362	0.05	6.82227e-28	4
Selenow	7.95644e-32	1.17009	0.45	0.074	9.28437e-28	4
Fam49b	1.60211e-31	1.40576	0.5	0.092	1.86951e-27	4
Hmgb1	1.73053e-31	1.22198	0.562	0.111	2.01935e-27	4
Marcks	2.69156e-31	1.73253	0.375	0.057	3.14079e-27	4
Slc9a9	3.45707e-31	1.34069	0.338	0.046	4.03405e-27	4
Tomm22	5.80738e-31	0.643712	0.25	0.025	6.77663e-27	4
Tomm6	6.19043e-31	1.17495	0.412	0.066	7.22362e-27	4
Cox8a	6.67473e-31	1.48499	0.6	0.134	7.78875e-27	4
Snhg8	2.20042e-30	0.941273	0.262	0.029	2.56767e-26	4
Manf	4.75997e-30	0.88988	0.262	0.029	5.55441e-26	4
Itm2b	5.93501e-30	1.89317	0.675	0.181	6.92556e-26	4
Ftl1	7.73312e-30	2.43467	0.85	0.334	9.02378e-26	4
Lyn	8.36788e-30	1.78736	0.512	0.109	9.76448e-26	4
Srp9	8.48253e-30	0.793614	0.25	0.027	9.89826e-26	4
Evl	1.10574e-29	0.749538	0.262	0.029	1.29029e-25	4
Srp14	1.14467e-29	1.17805	0.25	0.027	1.33571e-25	4
Snrpd2	1.5781e-29	1.12466	0.288	0.035	1.84149e-25	4
Arpc2	2.21401e-29	1.47652	0.588	0.135	2.58352e-25	4
Rpl5	2.49735e-29	1.5099	0.575	0.131	2.91416e-25	4
Inpp5d	2.90539e-29	1.16027	0.325	0.045	3.3903e-25	4
H2-Q4	3.67697e-29	0.906382	0.262	0.03	4.29065e-25	4
Tmem176b	4.67228e-29	2.2445	0.462	0.096	5.45209e-25	4
Ndufa3	9.7652e-29	0.849184	0.425	0.072	1.1395e-24	4
Hint1	1.15751e-28	1.62619	0.438	0.08	1.35069e-24	4
Ywhah	2.83943e-28	1.01816	0.25	0.028	3.31333e-24	4
Cox6b1	2.84232e-28	1.25099	0.525	0.109	3.3167e-24	4
Nrros	2.87623e-28	1.04507	0.25	0.028	3.35628e-24	4
Bola2	3.89804e-28	1.15591	0.262	0.031	4.54862e-24	4
Set	4.76472e-28	1.15972	0.325	0.046	5.55996e-24	4
Bloc1s1	5.51277e-28	1.23382	0.312	0.044	6.43285e-24	4
Actg1	5.6833e-28	1.65365	0.55	0.127	6.63185e-24	4
Eef1d	1.23077e-27	1.54701	0.462	0.092	1.43618e-23	4
1810037I17Rik	1.34345e-27	1.12465	0.262	0.032	1.56768e-23	4
Atp5mpl	1.93896e-27	0.959152	0.338	0.05	2.26257e-23	4
H2-Q7	2.30229e-27	1.65052	0.3	0.042	2.68654e-23	4
Ctsh	3.51792e-27	1.58115	0.362	0.06	4.10506e-23	4
Psma2	5.37234e-27	0.95835	0.288	0.038	6.26898e-23	4
Arpc4	7.33728e-27	1.20819	0.425	0.078	8.56187e-23	4
S100a11	1.28104e-26	1.21835	0.325	0.049	1.49485e-22	4
Gnai2	2.56332e-26	1.25347	0.462	0.091	2.99114e-22	4
Pnrc1	3.546e-26	1.06742	0.275	0.036	4.13783e-22	4
Cct7	3.75751e-26	0.99867	0.3	0.042	4.38464e-22	4
Cotl1	4.2995e-26	0.922879	0.3	0.042	5.01709e-22	4
Ifngr1	5.6412e-26	1.26338	0.288	0.041	6.58271e-22	4
Gm10076	8.09851e-26	1.18253	0.338	0.053	9.45015e-22	4
Pag1	8.49871e-26	1.10951	0.3	0.043	9.91714e-22	4
Sdcbp	8.62591e-26	1.22296	0.288	0.04	1.00656e-21	4
Atp5md	9.43157e-26	1.11159	0.388	0.069	1.10057e-21	4
Ifitm3	1.37089e-25	1.74857	0.362	0.063	1.59969e-21	4
Rabac1	1.565e-25	0.93282	0.412	0.075	1.8262e-21	4
Ndufa13	2.43334e-25	1.14303	0.462	0.094	2.83946e-21	4
Snrpb	2.53798e-25	0.896127	0.3	0.043	2.96157e-21	4
Dazap2	2.55034e-25	0.926768	0.288	0.04	2.976e-21	4
Csf1r	3.47555e-25	1.59584	0.325	0.052	4.05562e-21	4
Gngt2	3.63472e-25	1.2715	0.262	0.035	4.24135e-21	4
Gnb2	4.41231e-25	0.815235	0.425	0.079	5.14872e-21	4
Pdcd10	7.11808e-25	0.841169	0.325	0.051	8.30609e-21	4
Serinc3	1.38852e-24	1.67253	0.55	0.14	1.62026e-20	4
Ybx1	2.32163e-24	1.36383	0.55	0.135	2.70911e-20	4
Psmb3	3.33006e-24	0.889695	0.312	0.049	3.88584e-20	4
Tsc22d4	3.43844e-24	1.19507	0.375	0.068	4.01232e-20	4
Elmo1	3.78148e-24	1.14424	0.45	0.094	4.41261e-20	4
Gabarap	4.3937e-24	1.24907	0.45	0.096	5.12701e-20	4
Crlf3	4.69387e-24	1.16686	0.312	0.05	5.47728e-20	4
Psma5	5.57112e-24	0.71243	0.262	0.035	6.50095e-20	4
Sh3kbp1	8.73949e-24	1.12576	0.3	0.046	1.01981e-19	4
Pabpc1	9.92474e-24	0.985544	0.438	0.089	1.15812e-19	4
Hexb	1.36939e-23	1.4409	0.325	0.056	1.59794e-19	4
Hnrnpf	1.65354e-23	1.31753	0.375	0.071	1.92951e-19	4
Wipf1	2.5175e-23	1.27676	0.438	0.092	2.93767e-19	4
Atp5j2	2.77054e-23	1.41302	0.5	0.119	3.23294e-19	4
Klf6	2.96095e-23	0.881978	0.262	0.037	3.45513e-19	4
Adgre5	4.13216e-23	0.829893	0.262	0.037	4.82181e-19	4
Ndufa1	5.00894e-23	0.921034	0.262	0.037	5.84493e-19	4
Eif3h	6.19034e-23	1.0927	0.35	0.063	7.22351e-19	4
Mrpl33	6.44801e-23	1.4283	0.312	0.053	7.52418e-19	4
Ppp1ca	1.04939e-22	1.05569	0.425	0.089	1.22453e-18	4
Nudc	1.12678e-22	0.69854	0.275	0.04	1.31484e-18	4
Rnasek	1.15879e-22	0.847213	0.35	0.062	1.35219e-18	4
Ubxn1	1.25815e-22	1.05323	0.325	0.055	1.46814e-18	4
Timm10b	1.27805e-22	0.957681	0.262	0.038	1.49135e-18	4
Atp5g2	1.50798e-22	1.18207	0.4	0.081	1.75966e-18	4
Cd81	1.51239e-22	1.91634	0.438	0.104	1.7648e-18	4
Celf2	1.95115e-22	1.28712	0.5	0.12	2.27679e-18	4
Uqcrb	3.72444e-22	1.14554	0.325	0.057	4.34604e-18	4
Reep5	4.90422e-22	0.869613	0.312	0.052	5.72274e-18	4
Nme1	7.80397e-22	0.795752	0.262	0.038	9.10645e-18	4
Rap1a	9.16735e-22	1.28368	0.475	0.114	1.06974e-17	4
Atp5l	1.01606e-21	1.14537	0.537	0.138	1.18564e-17	4
Ndufb11	2.17782e-21	0.966592	0.312	0.054	2.54129e-17	4
Rbx1	3.74231e-21	1.04939	0.4	0.084	4.3669e-17	4
Ctsb	4.49513e-21	1.92348	0.4	0.091	5.24536e-17	4
Grcc10	4.67853e-21	1.01244	0.325	0.059	5.45938e-17	4
Spcs2	8.66138e-21	0.857395	0.262	0.041	1.0107e-16	4
Rps15	1.14709e-20	1.31953	0.738	0.266	1.33854e-16	4
Atox1	1.22734e-20	1.36512	0.412	0.093	1.43219e-16	4
Psmb1	1.3377e-20	0.92527	0.325	0.06	1.56096e-16	4
Sumo2	3.93183e-20	1.14128	0.35	0.07	4.58805e-16	4
Cd47	4.32616e-20	0.883162	0.425	0.094	5.0482e-16	4
Chchd2	4.34224e-20	1.24003	0.562	0.161	5.06696e-16	4
Plcg2	6.69726e-20	1.08044	0.288	0.05	7.81504e-16	4
Clec2d	1.39256e-19	1.10491	0.412	0.095	1.62497e-15	4
Msn	1.66532e-19	1.14998	0.4	0.091	1.94326e-15	4
Calm2	1.79337e-19	0.912791	0.412	0.092	2.09268e-15	4
Psma7	2.25477e-19	1.15984	0.35	0.072	2.63109e-15	4
Atp5h	2.45778e-19	1.09913	0.462	0.118	2.86798e-15	4
Dek	3.34179e-19	0.703855	0.275	0.046	3.89953e-15	4
Pip4k2a	4.7264e-19	1.39525	0.4	0.096	5.51523e-15	4
Map1lc3b	5.37216e-19	0.745463	0.275	0.047	6.26878e-15	4
Dad1	5.9564e-19	0.838926	0.3	0.055	6.95052e-15	4
Mef2c	6.5721e-19	1.92541	0.388	0.096	7.66898e-15	4
Capzb	1.014e-18	0.902009	0.4	0.092	1.18324e-14	4
Rnaset2b	1.11091e-18	0.839503	0.262	0.044	1.29632e-14	4
Ifitm2	1.17669e-18	1.34293	0.3	0.057	1.37308e-14	4
Ndufb9	1.37472e-18	0.986269	0.35	0.074	1.60417e-14	4
Cytip	1.76207e-18	0.744109	0.25	0.041	2.05616e-14	4
Atp5f1	2.15868e-18	0.796321	0.4	0.09	2.51897e-14	4
Tbca	2.7712e-18	0.788106	0.312	0.061	3.23371e-14	4
Romo1	2.97037e-18	0.804306	0.25	0.042	3.46612e-14	4
Mbnl1	3.21904e-18	1.43914	0.613	0.22	3.7563e-14	4
Ndufb3	5.74627e-18	0.905239	0.288	0.054	6.70532e-14	4
Eef1g	7.59139e-18	1.01868	0.35	0.078	8.8584e-14	4
Rps27l	7.79599e-18	1.12352	0.25	0.043	9.09714e-14	4
Ywhab	9.33868e-18	0.982292	0.338	0.071	1.08973e-13	4
Tpm3	1.1909e-17	0.814208	0.438	0.109	1.38967e-13	4
Taldo1	1.87478e-17	1.04933	0.288	0.056	2.18768e-13	4
Slc25a5	2.36617e-17	0.638685	0.312	0.062	2.76109e-13	4
Rhoa	2.88719e-17	0.964343	0.462	0.123	3.36906e-13	4
Gapdh	3.11191e-17	0.979146	0.35	0.078	3.63128e-13	4
Tagln2	3.63203e-17	0.8157	0.262	0.047	4.23821e-13	4
Man2b1	3.89442e-17	0.848162	0.312	0.064	4.5444e-13	4
H2-Q6	5.32114e-17	0.667903	0.275	0.051	6.20924e-13	4
Ndufa4	5.97869e-17	0.860666	0.425	0.108	6.97653e-13	4
Mif	6.10872e-17	0.667507	0.262	0.048	7.12827e-13	4
Ifi203	7.00081e-17	0.958198	0.288	0.057	8.16925e-13	4
Tkt	7.32607e-17	0.882606	0.275	0.052	8.54879e-13	4
Nedd8	7.76351e-17	0.896324	0.325	0.07	9.05924e-13	4
Sp100	1.05368e-16	0.653537	0.375	0.087	1.22954e-12	4
Cdc42se2	1.79709e-16	0.682544	0.262	0.048	2.09703e-12	4
Psap	2.99978e-16	1.68446	0.6	0.236	3.50044e-12	4
S100a10	3.20756e-16	1.06926	0.275	0.054	3.7429e-12	4
Polr1d	5.88903e-16	1.10247	0.3	0.065	6.87191e-12	4
Ccdc12	1.38838e-15	0.994362	0.338	0.079	1.6201e-11	4
Taf10	1.6713e-15	0.861947	0.25	0.048	1.95024e-11	4
Hspa8	2.6596e-15	1.15843	0.662	0.258	3.10348e-11	4
Scand1	3.08507e-15	0.917881	0.3	0.066	3.59997e-11	4
Psmb4	3.62887e-15	0.910736	0.25	0.049	4.23453e-11	4
Peli1	3.77442e-15	0.67239	0.362	0.088	4.40437e-11	4
Eif3e	4.20301e-15	0.617105	0.262	0.052	4.90449e-11	4
Eif5a	6.60367e-15	0.969498	0.288	0.063	7.70583e-11	4
Eef2	7.09458e-15	0.870285	0.512	0.155	8.27867e-11	4
Bri3	8.20834e-15	0.872407	0.288	0.063	9.57831e-11	4
Gimap6	1.05874e-14	1.33856	0.25	0.051	1.23544e-10	4
Mcl1	1.43389e-14	0.970701	0.35	0.09	1.6732e-10	4
Hsp90ab1	1.73194e-14	1.15753	0.637	0.258	2.021e-10	4
Ifnar2	2.50057e-14	0.74035	0.3	0.069	2.91792e-10	4
Hspe1	2.52511e-14	0.669154	0.275	0.059	2.94655e-10	4
Cox7b	2.6204e-14	0.720694	0.325	0.078	3.05774e-10	4
Brk1	2.62668e-14	0.833553	0.288	0.064	3.06508e-10	4
Samhd1	3.10604e-14	0.753601	0.25	0.051	3.62444e-10	4
Cox6c	4.25737e-14	0.831735	0.475	0.145	4.96793e-10	4
Ptpn1	4.52295e-14	0.697789	0.275	0.06	5.27783e-10	4
Mndal	7.00751e-14	0.9524	0.312	0.077	8.17706e-10	4
Mrps21	8.35074e-14	0.880351	0.3	0.071	9.74448e-10	4
Txnip	8.40713e-14	0.643696	0.35	0.089	9.81028e-10	4
Cox5a	1.02247e-13	0.623743	0.288	0.065	1.19312e-09	4
Tgfbr1	1.06456e-13	1.47492	0.35	0.096	1.24223e-09	4
D8Ertd738e	1.10601e-13	0.785748	0.35	0.091	1.2906e-09	4
Grb2	1.1272e-13	0.853406	0.375	0.102	1.31532e-09	4
Acer3	1.92518e-13	1.02549	0.275	0.063	2.24649e-09	4
Dennd4a	2.10263e-13	1.05788	0.262	0.057	2.45356e-09	4
Ndufa5	4.91478e-13	1.00885	0.262	0.06	5.73506e-09	4
Ndufb5	5.63396e-13	0.910913	0.288	0.069	6.57427e-09	4
Plekhm3	5.99274e-13	0.765634	0.275	0.064	6.99293e-09	4
Smap2	6.44555e-13	0.665181	0.262	0.059	7.52131e-09	4
Sh3bgrl	6.81117e-13	0.694857	0.25	0.055	7.94796e-09	4
Atp6v1g1	1.04419e-12	0.757121	0.262	0.06	1.21847e-08	4
Ccnd1	1.36822e-12	0.94904	0.25	0.057	1.59658e-08	4
Nme2	1.9008e-12	1.00626	0.388	0.12	2.21805e-08	4
Tmem176a	2.99679e-12	1.26615	0.375	0.117	3.49695e-08	4
Cox5b	3.28463e-12	0.946711	0.388	0.118	3.83283e-08	4
Rtn4	3.45486e-12	1.1371	0.325	0.092	4.03147e-08	4
Calr	3.76796e-12	0.786148	0.312	0.083	4.39684e-08	4
Dnaja2	3.80717e-12	0.425553	0.262	0.06	4.44258e-08	4
Elk3	4.22269e-12	0.835649	0.312	0.083	4.92746e-08	4
Ube2i	4.32699e-12	0.655675	0.312	0.082	5.04916e-08	4
Sat1	4.62171e-12	1.0439	0.412	0.13	5.39308e-08	4
Gpx1	4.84989e-12	1.10306	0.375	0.114	5.65934e-08	4
Nmt1	5.02577e-12	0.777953	0.35	0.098	5.86457e-08	4
Morf4l1	5.24711e-12	0.76219	0.325	0.089	6.12285e-08	4
Hnrnpa1	5.34016e-12	0.687538	0.25	0.057	6.23143e-08	4
Hnrnpa3	5.72469e-12	0.692565	0.412	0.126	6.68014e-08	4
Cnbp	7.53969e-12	0.588419	0.312	0.082	8.79807e-08	4
Tpd52	8.55636e-12	0.967375	0.375	0.115	9.98442e-08	4
Ets1	1.09788e-11	0.877747	0.312	0.087	1.28112e-07	4
S100a13	1.54392e-11	0.5924	0.25	0.058	1.8016e-07	4
Chmp2a	2.49411e-11	0.767559	0.275	0.071	2.91037e-07	4
Serbp1	3.61207e-11	1.0197	0.375	0.12	4.21492e-07	4
Fli1	5.83889e-11	0.588629	0.438	0.146	6.8134e-07	4
Prkch	6.05735e-11	0.75523	0.35	0.106	7.06833e-07	4
Iqgap1	6.19556e-11	0.763618	0.438	0.149	7.2296e-07	4
Tmem59	7.56881e-11	0.673666	0.275	0.072	8.83204e-07	4
Atp5j	8.56474e-11	0.623019	0.312	0.088	9.99419e-07	4
Tex14	9.93091e-11	1.41268	0.412	0.148	1.15884e-06	4
Erp29	1.15342e-10	0.552514	0.262	0.067	1.34592e-06	4
Inpp4b	1.22748e-10	0.981935	0.375	0.126	1.43235e-06	4
Park7	1.32866e-10	0.585246	0.375	0.117	1.55042e-06	4
Selenop	1.96757e-10	1.27056	0.325	0.101	2.29596e-06	4
Tln1	2.3833e-10	0.677783	0.362	0.114	2.78108e-06	4
Skap2	2.44113e-10	0.974594	0.375	0.128	2.84855e-06	4
Ctcf	2.71095e-10	0.473499	0.288	0.078	3.1634e-06	4
Ostf1	4.01957e-10	0.935039	0.262	0.072	4.69043e-06	4
Ccnd3	4.06899e-10	0.623285	0.288	0.082	4.74811e-06	4
Tle5	4.10729e-10	0.809467	0.412	0.142	4.79279e-06	4
Atp8a1	7.5699e-10	0.385044	0.288	0.08	8.83332e-06	4
Ncl	7.9606e-10	0.57759	0.275	0.077	9.28922e-06	4
Ndufa7	8.43744e-10	0.396092	0.25	0.065	9.84564e-06	4
Atpif1	8.56476e-10	1.182	0.312	0.102	9.99422e-06	4
Cox7a2	1.36061e-09	0.636648	0.325	0.101	1.58769e-05	4
Arhgef1	1.38637e-09	0.444183	0.325	0.099	1.61775e-05	4
Capza1	1.49041e-09	0.538238	0.325	0.1	1.73916e-05	4
Ptp4a2	1.78601e-09	0.614096	0.388	0.133	2.08409e-05	4
Pid1	1.81267e-09	1.14735	0.262	0.078	2.1152e-05	4
Prdx5	2.19788e-09	0.746394	0.312	0.099	2.56471e-05	4
Snx3	2.83997e-09	0.632917	0.288	0.084	3.31396e-05	4
Atp6v0e	3.609e-09	0.43256	0.25	0.069	4.21134e-05	4
Hnrnpk	3.84101e-09	0.474085	0.312	0.097	4.48208e-05	4
Snx5	4.84413e-09	0.709763	0.275	0.082	5.65262e-05	4
Atp5c1	5.01503e-09	0.707739	0.35	0.118	5.85204e-05	4
Polr2a	6.69074e-09	0.554053	0.288	0.087	7.80743e-05	4
Atp2b1	7.26769e-09	0.411123	0.4	0.141	8.48067e-05	4
Pebp1	9.03263e-09	0.493664	0.25	0.071	0.000105402	4
Zfp710	9.29036e-09	0.948024	0.275	0.087	0.000108409	4
Ndufb8	9.62085e-09	0.538711	0.25	0.071	0.000112266	4
Sumo1	9.75583e-09	0.671818	0.25	0.072	0.000113841	4
Aldoa	1.13336e-08	0.759091	0.388	0.142	0.000132252	4
Atp5g3	1.74621e-08	0.515314	0.262	0.078	0.000203765	4
Dock8	1.98873e-08	0.957158	0.438	0.184	0.000232065	4
Sesn1	2.14253e-08	0.438869	0.262	0.078	0.000250011	4
Nedd9	2.57293e-08	0.841206	0.4	0.15	0.000300235	4
Baz1a	3.53745e-08	0.333715	0.275	0.084	0.000412785	4
Klf13	3.6268e-08	0.501682	0.25	0.075	0.000423211	4
Ly6e	5.03225e-08	0.785847	0.375	0.143	0.000587213	4
Arl6ip1	5.54792e-08	0.552378	0.412	0.16	0.000647387	4
Atp5d	6.00689e-08	0.379784	0.4	0.149	0.000700944	4
Kdm7a	6.3171e-08	0.259387	0.288	0.091	0.000737143	4
Hnrnpc	6.32455e-08	0.412475	0.362	0.13	0.000738012	4
Arf1	6.76575e-08	0.68488	0.262	0.084	0.000789495	4
Ndufa2	7.23966e-08	0.661006	0.325	0.115	0.000844796	4
Pdia3	8.30511e-08	0.553984	0.325	0.113	0.000969123	4
Tut4	9.0865e-08	0.359322	0.3	0.1	0.0010603	4
Pitpna	1.05268e-07	0.570286	0.3	0.102	0.00122838	4
Vav3	1.15891e-07	0.484465	0.262	0.084	0.00135233	4
Pak2	1.33195e-07	0.444389	0.362	0.135	0.00155425	4
Esd	1.34371e-07	0.585471	0.25	0.078	0.00156798	4
Rapgef6	1.4618e-07	0.329068	0.375	0.137	0.00170577	4
Rnf13	1.46504e-07	0.39005	0.25	0.078	0.00170955	4
Notch2	1.66251e-07	0.349157	0.288	0.095	0.00193999	4
Hsp90aa1	2.2522e-07	0.866304	0.388	0.164	0.0026281	4
Cox4i1	2.33374e-07	0.675105	0.5	0.221	0.00272325	4
Rab14	2.52199e-07	0.481208	0.312	0.112	0.00294291	4
St3gal6	2.81904e-07	0.750655	0.3	0.109	0.00328954	4
Pten	2.9401e-07	0.349829	0.388	0.148	0.0034308	4
Tle4	3.60765e-07	0.341058	0.25	0.081	0.00420977	4
Pde4b	3.76429e-07	0.470034	0.275	0.094	0.00439256	4
Ptbp3	3.89135e-07	0.411935	0.35	0.131	0.00454082	4
Rsrp1	4.04175e-07	0.553424	0.5	0.224	0.00471631	4
Lrrfip1	4.14673e-07	0.481754	0.262	0.088	0.00483882	4
Ndufb7	4.87956e-07	0.652357	0.262	0.09	0.00569396	4
Hspa5	6.05166e-07	0.372702	0.288	0.102	0.00706169	4
Vamp8	6.28909e-07	0.643326	0.275	0.097	0.00733874	4
Eif4a1	6.39898e-07	0.464731	0.288	0.1	0.00746697	4
Rap1gds1	6.61701e-07	0.428755	0.325	0.122	0.00772139	4
Rbpj	7.1283e-07	0.74804	0.262	0.092	0.00831802	4
1810026B05Rik	8.2693e-07	0.329483	0.262	0.089	0.00964945	4
Trir	8.51885e-07	0.338754	0.262	0.089	0.00994064	4
Efcc1	4.4912e-60	2.71104	0.255	0.008	5.24078e-56	5
Rbms3	6.50394e-31	2.97435	0.872	0.274	7.58945e-27	5
Cdh11	5.84562e-30	2.95924	0.383	0.043	6.82126e-26	5
Gucy1a2	5.40944e-28	3.03625	0.511	0.086	6.31228e-24	5
Svep1	1.7446e-26	2.62431	0.34	0.038	2.03577e-22	5
Tshz2	2.21471e-24	2.95627	0.787	0.28	2.58434e-20	5
Rerg	3.46439e-23	2.24372	0.277	0.029	4.04259e-19	5
Gucy1a1	3.7833e-23	2.53698	0.298	0.033	4.41474e-19	5
Tenm3	4.22224e-20	2.63745	0.383	0.063	4.92694e-16	5
Lama2	1.53494e-16	2.55032	0.404	0.085	1.79112e-12	5
Cacna2d1	1.89453e-16	2.36196	0.255	0.035	2.21073e-12	5
Cfh	2.16928e-16	2.4649	0.511	0.138	2.53134e-12	5
Prkg1	4.39322e-16	2.23516	0.723	0.32	5.12645e-12	5
Cdh13	6.0231e-16	2.60209	0.277	0.042	7.02836e-12	5
B3galt1	4.00701e-15	2.38824	0.34	0.066	4.67578e-11	5
Rora	5.39528e-15	2.12128	0.809	0.456	6.29575e-11	5
Gm17167	6.99051e-15	2.21174	0.255	0.038	8.15723e-11	5
Cped1	1.85708e-14	2.55463	0.447	0.12	2.16703e-10	5
Zeb2	4.79707e-14	2.11711	0.723	0.38	5.5977e-10	5
Grk5	7.44856e-14	2.27977	0.468	0.134	8.69173e-10	5
Dlc1	3.25694e-13	2.5217	0.596	0.242	3.80052e-09	5
Cald1	9.58964e-13	2.63747	0.553	0.206	1.11902e-08	5
Fhl2	2.07353e-12	2.45721	0.426	0.121	2.4196e-08	5
Daam2	3.69323e-12	2.30371	0.255	0.046	4.30963e-08	5
Gulp1	7.84841e-12	2.28915	0.319	0.073	9.15832e-08	5
Kcnt2	3.78444e-11	2.27059	0.255	0.05	4.41606e-07	5
Lhfp	5.34021e-11	1.96451	0.298	0.067	6.23149e-07	5
Robo2	8.32455e-11	2.43558	0.426	0.137	9.71391e-07	5
Fbln5	9.42459e-11	2.12826	0.277	0.059	1.09976e-06	5
Meis1	1.49243e-10	2.29352	0.319	0.08	1.74152e-06	5
Pde8b	1.64652e-10	2.28326	0.277	0.061	1.92132e-06	5
Adam12	2.54951e-10	2.72371	0.277	0.062	2.97502e-06	5
Grm7	3.35612e-10	2.99963	0.34	0.095	3.91626e-06	5
Hsd11b1	1.6083e-09	2.03615	0.255	0.057	1.87673e-05	5
Psd3	2.41563e-09	1.89942	0.426	0.151	2.8188e-05	5
Fmnl2	4.90864e-09	1.81525	0.489	0.203	5.72789e-05	5
Negr1	4.92197e-09	2.21066	0.277	0.07	5.74345e-05	5
Csmd1	5.55308e-09	2.61602	0.383	0.131	6.47989e-05	5
Rarb	1.16297e-07	1.98185	0.298	0.091	0.00135707	5
Ldb2	1.29207e-07	2.21551	0.447	0.204	0.00150772	5
Fbxl7	1.9102e-07	1.79913	0.362	0.132	0.00222901	5
Itga9	2.35099e-07	2.07211	0.255	0.072	0.00274337	5
Igfbp7	5.29189e-07	1.92788	0.617	0.391	0.0061751	5
Flt1	4.52635e-17	2.30205	0.65	0.187	5.2818e-13	6
Ptprb	4.96778e-16	2.13226	0.55	0.139	5.79691e-12	6
Meis2	1.85285e-14	2.4402	0.8	0.371	2.16209e-10	6
Adgrl4	5.81484e-14	2.56284	0.5	0.129	6.78534e-10	6
Adgrf5	5.28678e-13	2.00791	0.45	0.11	6.16914e-09	6
Ebf1	2.19812e-12	2.37798	0.675	0.279	2.56499e-08	6
Cyyr1	4.07161e-12	2.37511	0.425	0.107	4.75116e-08	6
Pbx1	4.91495e-12	1.98423	0.9	0.64	5.73525e-08	6
Syne1	9.65288e-12	2.37311	0.575	0.208	1.12639e-07	6
Chrm3	1.04773e-11	2.21615	0.575	0.209	1.2226e-07	6
Dysf	1.35978e-11	2.21927	0.4	0.099	1.58673e-07	6
Shank3	1.44578e-11	1.85121	0.3	0.056	1.68708e-07	6
Rasgrp3	6.37896e-11	1.86439	0.325	0.069	7.44361e-07	6
Rapgef4	9.97791e-11	2.24457	0.45	0.131	1.16432e-06	6
Ldb2	1.45971e-09	1.8664	0.525	0.204	1.70334e-05	6
Emcn	2.31106e-09	1.78548	0.5	0.176	2.69678e-05	6
Fli1	3.28381e-09	1.80432	0.45	0.148	3.83187e-05	6
Vav3	7.47265e-09	2.05129	0.325	0.085	8.71983e-05	6
Ptprg	1.06706e-08	1.87898	0.725	0.432	0.000124515	6
Fgd5	1.83547e-08	2.23969	0.3	0.077	0.000214181	6
Ehd4	5.38501e-08	2.19555	0.325	0.092	0.000628377	6
Cmss1	7.27249e-08	0.680781	1	0.993	0.000848627	6
Itpkb	9.18023e-08	1.93468	0.35	0.106	0.00107124	6
Plpp1	1.13937e-07	1.67057	0.5	0.204	0.00132953	6
Tcf4	6.96452e-07	1.95388	0.6	0.35	0.0081269	6

## Sheet: Cluster Genes - A2HTN
Table S4	Cluster marker genes by adjusted p-value for each cluster in the A2HTN sample
gene	p_val	avg_log2FC	pct.1	pct.2	p_val_adj	cluster
Rsad2	0	3.28336	0.963	0.123	0	0
Plvap	0	2.88495	0.97	0.185	0	0
Plpp3	0	2.79882	0.975	0.262	0	0
Fabp4	0	2.77437	0.983	0.358	0	0
Flt1	0	2.60234	0.992	0.288	0	0
H2-D1	0	2.5397	0.997	0.292	0	0
Ly6c1	0	2.53901	0.994	0.314	0	0
B2m	0	2.53328	1	0.308	0	0
Kdr	0	2.51829	0.947	0.142	0	0
Adgrl4	0	2.454	0.984	0.204	0	0
Tcim	0	2.45152	0.924	0.115	0	0
Emcn	0	2.4372	0.998	0.348	0	0
Plpp1	0	2.40894	0.986	0.314	0	0
H2-T23	0	2.38451	0.918	0.082	0	0
Cd200	0	2.34063	0.937	0.114	0	0
Rgcc	0	2.33929	0.889	0.108	0	0
Bst2	0	2.32607	0.941	0.1	0	0
Ly6e	0	2.28697	0.997	0.344	0	0
Ifitm3	0	2.28044	0.995	0.3	0	0
Klf2	0	2.21597	0.911	0.151	0	0
Id3	0	2.17337	0.961	0.198	0	0
Ehd4	0	2.17252	0.966	0.178	0	0
Ly6a	0	2.15877	0.991	0.363	0	0
Itm2b	0	2.15019	0.995	0.355	0	0
Cd300lg	0	2.13292	0.901	0.1	0	0
Cyyr1	0	2.11567	0.934	0.141	0	0
Gimap6	0	2.08108	0.934	0.133	0	0
Cd81	0	2.0802	0.99	0.234	0	0
Srgn	0	2.07774	0.967	0.167	0	0
Ppia	0	2.06467	0.994	0.25	0	0
Gng11	0	2.04778	0.939	0.156	0	0
Gnas	0	2.0414	0.998	0.306	0	0
Hspb1	0	2.0306	0.899	0.119	0	0
Nrp1	0	2.02525	0.993	0.356	0	0
Sox18	0	2.0241	0.898	0.096	0	0
H3f3a	0	2.02024	0.979	0.193	0	0
Cd34	0	2.01598	0.901	0.091	0	0
H3f3b	0	1.99763	0.981	0.181	0	0
Calm1	0	1.98399	0.987	0.217	0	0
Laptm4a	0	1.97788	0.984	0.195	0	0
Sparc	0	1.96395	0.989	0.238	0	0
Tek	0	1.96084	0.932	0.163	0	0
Cd47	0	1.95225	0.93	0.123	0	0
Ubb	0	1.94411	0.993	0.238	0	0
Eif1	0	1.92	0.983	0.232	0	0
Cmtm8	0	1.90894	0.851	0.08	0	0
Cdh5	0	1.90786	0.934	0.107	0	0
Ifitm2	0	1.90746	0.985	0.212	0	0
H2-Q4	0	1.90473	0.823	0.064	0	0
Mef2c	0	1.90072	0.912	0.14	0	0
Cd93	0	1.89572	0.815	0.063	0	0
Arhgap31	0	1.8792	0.94	0.142	0	0
Rps23	0	1.85914	0.991	0.228	0	0
Ramp2	0	1.85858	0.892	0.118	0	0
Psmb8	0	1.8385	0.869	0.082	0	0
Rpl27a	0	1.83583	0.994	0.261	0	0
Slfn5	0	1.81734	0.902	0.114	0	0
Gnai2	0	1.79716	0.968	0.183	0	0
Cavin3	0	1.79428	0.898	0.114	0	0
Ptma	0	1.79411	0.996	0.274	0	0
Esam	0	1.7912	0.912	0.108	0	0
Txnip	0	1.78548	0.931	0.144	0	0
Btg1	0	1.7692	0.858	0.089	0	0
Selenom	0	1.71606	0.905	0.111	0	0
Rps28	0	1.71449	0.975	0.185	0	0
Selenof	0	1.62742	0.888	0.095	0	0
Rpl15	0	1.53484	0.883	0.096	0	0
Rps21	1.26838e-307	1.85111	0.996	0.313	1.59917e-303	0
Vamp5	1.27253e-306	1.75205	0.907	0.13	1.60441e-302	0
S100a10	1.39227e-306	1.74788	0.94	0.155	1.75538e-302	0
Ptprb	2.57871e-306	1.90576	0.982	0.25	3.25124e-302	0
Tie1	1.80738e-305	1.59273	0.87	0.103	2.27875e-301	0
H2-K1	2.91356e-305	1.96279	0.993	0.364	3.67342e-301	0
Rps7	6.87825e-305	1.68485	0.97	0.175	8.6721e-301	0
Rps27	7.38018e-305	1.79428	0.997	0.318	9.30493e-301	0
Il10rb	7.63431e-304	1.54867	0.802	0.067	9.62534e-300	0
Elk3	1.12229e-303	1.72496	0.898	0.134	1.41499e-299	0
Ccdc85b	1.18506e-303	1.46412	0.864	0.096	1.49412e-299	0
Rpl9	1.52477e-303	1.7586	0.994	0.253	1.92243e-299	0
Ifnar2	1.99847e-303	1.63717	0.884	0.112	2.51967e-299	0
Tpt1	4.88918e-302	1.73776	0.997	0.422	6.16427e-298	0
Rpl34	2.28001e-301	1.71496	0.99	0.217	2.87464e-297	0
Slc9a3r2	4.94694e-300	1.89117	0.976	0.231	6.23711e-296	0
Rps18	8.92744e-300	1.68154	0.984	0.201	1.12557e-295	0
Ifi44	1.57636e-299	1.96309	0.793	0.074	1.98748e-295	0
Rps29	1.34337e-298	1.73014	0.995	0.354	1.69372e-294	0
Rpl39	4.76515e-298	1.61489	0.981	0.202	6.0079e-294	0
Exoc3l2	8.93338e-298	1.82929	0.899	0.137	1.12632e-293	0
Pbx1	9.49526e-298	1.8966	0.997	0.628	1.19716e-293	0
Tm4sf1	1.9123e-297	2.1864	0.973	0.277	2.41103e-293	0
Rps14	1.69296e-296	1.74235	0.994	0.285	2.13449e-292	0
Tmsb4x	5.14002e-296	1.78256	0.995	0.453	6.48054e-292	0
Btnl9	7.1078e-296	2.17572	0.691	0.031	8.96151e-292	0
Lmo2	5.97376e-295	1.63101	0.825	0.087	7.53172e-291	0
Rasgrp3	9.24615e-295	1.63521	0.843	0.1	1.16576e-290	0
Ifi203	1.03465e-294	1.79567	0.822	0.093	1.30448e-290	0
Selenok	2.97409e-294	1.39053	0.866	0.099	3.74973e-290	0
Rpl37a	3.53553e-294	1.72053	0.994	0.324	4.45759e-290	0
Txn1	4.77837e-294	1.62784	0.94	0.16	6.02457e-290	0
Rpl35a	1.12709e-293	1.73141	0.988	0.252	1.42104e-289	0
Fam167b	1.34045e-293	1.70046	0.757	0.057	1.69003e-289	0
Rpl18	3.90303e-293	1.64053	0.985	0.213	4.92094e-289	0
S100a13	2.28815e-292	1.5505	0.955	0.16	2.8849e-288	0
Crip2	2.97408e-292	1.68115	0.941	0.157	3.74972e-288	0
Gng5	3.55773e-292	1.4624	0.934	0.136	4.48559e-288	0
Sem1	1.19709e-291	1.46809	0.875	0.108	1.50929e-287	0
Rps16	1.26518e-291	1.68579	0.992	0.257	1.59514e-287	0
Cfl1	4.54737e-291	1.47059	0.902	0.13	5.73332e-287	0
Tnfsf10	5.30729e-291	1.70506	0.839	0.101	6.69144e-287	0
Tmem204	5.59522e-291	1.62197	0.78	0.07	7.05445e-287	0
Rhob	9.37013e-291	1.8848	0.854	0.118	1.18139e-286	0
Mmrn2	1.10566e-290	1.56269	0.84	0.095	1.39401e-286	0
Meis2	2.23001e-290	1.92233	0.992	0.392	2.8116e-286	0
Rpl27	2.59919e-290	1.49573	0.96	0.168	3.27706e-286	0
Arpc3	2.89472e-289	1.44659	0.884	0.116	3.64966e-285	0
Tnfaip2	4.99568e-289	1.80914	0.832	0.106	6.29855e-285	0
Dram1	9.0503e-289	1.67489	0.694	0.036	1.14106e-284	0
Icam2	9.1136e-289	1.46418	0.848	0.097	1.14904e-284	0
Kank3	9.12958e-289	1.48544	0.813	0.085	1.15106e-284	0
Rpl30	5.65131e-288	1.64649	0.977	0.221	7.12517e-284	0
S100a16	7.6098e-286	1.48252	0.851	0.102	9.59443e-282	0
Gimap4	2.07757e-285	1.55917	0.828	0.09	2.6194e-281	0
AW112010	2.49242e-285	1.92087	0.716	0.047	3.14244e-281	0
Btf3	3.08547e-285	1.30202	0.889	0.115	3.89016e-281	0
Rps6	3.3661e-285	1.45374	0.936	0.158	4.24398e-281	0
Rps5	1.81888e-284	1.63451	0.973	0.208	2.29324e-280	0
Dynll1	3.5293e-284	1.56434	0.911	0.144	4.44974e-280	0
Calcrl	5.00768e-283	1.73932	0.886	0.142	6.31368e-279	0
Rhoa	7.95205e-283	1.54513	0.956	0.182	1.00259e-278	0
Egfl7	1.43409e-282	1.74358	0.987	0.296	1.8081e-278	0
Rps4x	2.19518e-282	1.51701	0.979	0.213	2.76768e-278	0
Myl12a	2.78336e-282	1.44417	0.906	0.133	3.50926e-278	0
Uba52	8.40285e-282	1.67239	0.987	0.294	1.05943e-277	0
Rps11	2.2928e-281	1.61676	0.982	0.225	2.89076e-277	0
Rps15a	4.64519e-281	1.6113	0.98	0.23	5.85665e-277	0
Ramp3	4.87139e-280	1.74445	0.738	0.058	6.14185e-276	0
Serinc3	3.08755e-279	1.71243	0.977	0.253	3.89278e-275	0
Rpl17	7.52853e-279	1.59704	0.985	0.253	9.49198e-275	0
Rapgef5	1.28537e-278	1.58339	0.837	0.11	1.6206e-274	0
Klf7	2.61226e-278	1.55919	0.861	0.121	3.29354e-274	0
Ppib	3.89061e-278	1.33479	0.879	0.122	4.90528e-274	0
Rpl10	6.39484e-278	1.53873	0.966	0.207	8.06261e-274	0
Id1	3.06684e-277	1.94624	0.823	0.118	3.86668e-273	0
Tmem59	1.23783e-276	1.40882	0.9	0.136	1.56066e-272	0
Tinagl1	3.02289e-276	1.80733	0.784	0.087	3.81126e-272	0
Psme1	7.97763e-276	1.4299	0.851	0.113	1.00582e-271	0
Eef1a1	8.41163e-276	1.58061	0.995	0.387	1.06054e-271	0
Pecam1	9.36793e-275	1.59676	0.969	0.219	1.18111e-270	0
Rps3a1	1.59802e-274	1.43945	0.977	0.21	2.01478e-270	0
Snrpb	3.61685e-274	1.3377	0.807	0.088	4.56013e-270	0
Kitl	9.44361e-274	1.96874	0.81	0.113	1.19065e-269	0
Rps13	3.53934e-273	1.56202	0.97	0.219	4.4624e-269	0
Rpl32	1.54249e-272	1.51717	0.99	0.259	1.94478e-268	0
Gpihbp1	1.71244e-272	2.18507	0.793	0.111	2.15904e-268	0
Ets1	1.87562e-272	1.49914	0.871	0.131	2.36478e-268	0
Rpl19	2.92237e-272	1.57923	0.986	0.295	3.68453e-268	0
Rplp2	1.76016e-271	1.55502	0.975	0.226	2.21921e-267	0
Hspg2	1.9984e-271	1.55863	0.829	0.111	2.51958e-267	0
Rpl7	7.25816e-271	1.44996	0.963	0.19	9.15108e-267	0
Plscr2	9.16062e-271	1.96281	0.944	0.265	1.15497e-266	0
Rpl6	3.61043e-270	1.48839	0.976	0.225	4.55202e-266	0
Ets2	2.46639e-269	1.57886	0.736	0.068	3.10962e-265	0
Rps26	5.55276e-269	1.28274	0.942	0.175	7.00093e-265	0
Rps10	1.33646e-268	1.50708	0.985	0.258	1.68501e-264	0
Cd9	3.57333e-268	1.58515	0.854	0.128	4.50526e-264	0
Rpl24	4.35048e-268	1.50514	0.977	0.222	5.48508e-264	0
Smco4	4.52145e-268	1.39758	0.772	0.079	5.70064e-264	0
Uqcrb	5.85996e-268	1.21555	0.816	0.096	7.38824e-264	0
Sumo2	2.44091e-267	1.29505	0.878	0.128	3.07749e-263	0
Igfbp5	5.96487e-267	2.83322	0.889	0.349	7.5205e-263	0
AY036118	6.5348e-267	1.74966	0.969	0.281	8.23907e-263	0
Rps24	8.36805e-267	1.54131	0.996	0.342	1.05504e-262	0
Selenow	1.6965e-266	1.36308	0.904	0.148	2.13895e-262	0
Tcf4	2.18907e-266	1.72806	0.989	0.351	2.75999e-262	0
Rabac1	2.4415e-266	1.35676	0.913	0.155	3.07824e-262	0
Rps8	4.57656e-266	1.57491	0.995	0.347	5.77013e-262	0
1810037I17Rik	1.63226e-265	1.22296	0.757	0.072	2.05796e-261	0
Tomm7	1.73419e-265	1.275	0.782	0.081	2.18646e-261	0
Fabp5	4.96387e-265	1.96576	0.711	0.059	6.25845e-261	0
Sgk1	5.28155e-265	2.02885	0.842	0.149	6.65898e-261	0
Hmgb1	8.30541e-265	1.42648	0.966	0.205	1.04715e-260	0
Rpl23	1.07927e-264	1.51266	0.995	0.307	1.36075e-260	0
Esm1	3.14356e-264	2.75561	0.725	0.08	3.9634e-260	0
Rpl7a	5.42994e-263	1.29288	0.901	0.142	6.84606e-259	0
Rpl35	3.55027e-262	1.44443	0.969	0.225	4.47618e-258	0
Tspo	5.04466e-262	1.2888	0.823	0.107	6.36031e-258	0
Arf5	6.43019e-262	1.23979	0.788	0.087	8.10719e-258	0
Rpl26	6.57131e-262	1.48498	0.981	0.262	8.28511e-258	0
Rps3	1.10148e-261	1.451	0.983	0.22	1.38875e-257	0
Rpl12	3.36444e-261	1.35726	0.921	0.168	4.24189e-257	0
Cst3	7.25194e-261	1.5857	0.974	0.257	9.14324e-257	0
Marcks	9.33738e-261	1.86699	0.781	0.106	1.17726e-256	0
Chchd2	1.28198e-260	1.38871	0.959	0.195	1.61632e-256	0
Anxa5	1.73611e-260	1.247	0.829	0.107	2.18889e-256	0
4931406P16Rik	4.39499e-260	1.42426	0.859	0.13	5.54121e-256	0
Rps27a	1.41878e-259	1.43371	0.987	0.262	1.7888e-255	0
Rpl23a	2.83525e-259	1.30462	0.88	0.134	3.57469e-255	0
Tmem50a	3.81326e-259	1.24776	0.782	0.088	4.80775e-255	0
Clic1	4.96997e-259	1.30618	0.85	0.121	6.26614e-255	0
Rpl37	1.03475e-258	1.51238	0.991	0.331	1.30461e-254	0
H2-Q7	7.43596e-258	1.46119	0.802	0.101	9.37526e-254	0
Nfkbia	1.03045e-257	1.45271	0.739	0.072	1.2992e-253	0
Psmb10	5.37058e-257	1.39996	0.733	0.071	6.77122e-253	0
Rpl22	3.77369e-256	1.36666	0.942	0.187	4.75787e-252	0
Ebf1	1.07173e-255	1.8163	0.947	0.265	1.35124e-251	0
Eva1b	2.1051e-255	1.37683	0.805	0.105	2.65412e-251	0
Ier5	4.70513e-255	1.38584	0.689	0.053	5.93223e-251	0
Rdx	5.46543e-255	1.72926	0.939	0.232	6.89082e-251	0
Ost4	1.59669e-254	1.23296	0.723	0.066	2.0131e-250	0
Rps25	1.78703e-254	1.35777	0.97	0.212	2.25309e-250	0
Psme2	2.05662e-254	1.35072	0.691	0.054	2.59298e-250	0
Psmb9	3.91976e-254	1.50209	0.663	0.046	4.94203e-250	0
Lims2	7.86261e-254	1.50507	0.848	0.137	9.91318e-250	0
Adgrf5	1.02388e-253	1.48676	0.943	0.201	1.29091e-249	0
Ppp1r2	1.41789e-252	1.31605	0.811	0.109	1.78768e-248	0
Lrrc8c	3.91763e-252	1.37951	0.733	0.076	4.93935e-248	0
Clec2d	5.90738e-252	1.48137	0.817	0.116	7.44803e-248	0
Fkbp1a	9.73635e-252	1.33232	0.879	0.143	1.22756e-247	0
Slc43a3	1.01169e-251	1.49772	0.68	0.055	1.27554e-247	0
Rap1b	4.31523e-251	1.37184	0.837	0.127	5.44064e-247	0
Thrsp	5.16678e-251	1.3954	0.615	0.026	6.51428e-247	0
Ednrb	8.14067e-251	1.82149	0.678	0.057	1.02638e-246	0
Rpl3	1.45372e-250	1.3279	0.957	0.209	1.83286e-246	0
Podxl	2.2652e-250	1.51779	0.956	0.234	2.85597e-246	0
Rpl29	3.82164e-250	1.24769	0.946	0.194	4.81833e-246	0
Cd38	4.57608e-250	1.49778	0.67	0.053	5.76952e-246	0
Itgb1	2.08001e-249	1.35116	0.907	0.17	2.62248e-245	0
Jup	5.63677e-249	1.46983	0.772	0.097	7.10684e-245	0
Rac1	6.83285e-249	1.3064	0.846	0.127	8.61486e-245	0
Calm2	1.61733e-248	1.28508	0.863	0.137	2.03912e-244	0
Prkar1a	4.29919e-248	1.26593	0.772	0.093	5.42042e-244	0
Cdc42	6.60947e-248	1.22346	0.896	0.154	8.33322e-244	0
Rack1	1.04913e-247	1.32493	0.942	0.194	1.32274e-243	0
Ostf1	1.54697e-247	1.18765	0.834	0.121	1.95042e-243	0
Cd151	2.18153e-247	1.29872	0.701	0.062	2.75047e-243	0
Itpkb	2.44093e-246	1.42678	0.813	0.118	3.07752e-242	0
Zfp36l1	4.93758e-246	1.36744	0.836	0.13	6.22529e-242	0
Robo4	9.93286e-246	1.39653	0.625	0.035	1.25233e-241	0
Pfn1	1.03207e-245	1.23482	0.874	0.145	1.30123e-241	0
Myct1	1.71191e-245	1.30074	0.711	0.067	2.15837e-241	0
Ywhab	6.43484e-245	1.34449	0.786	0.107	8.11305e-241	0
Anxa2	6.87316e-245	1.29004	0.839	0.132	8.66568e-241	0
Rpl11	4.52798e-243	1.36849	0.977	0.256	5.70888e-239	0
Mndal	8.51053e-243	1.45818	0.843	0.145	1.07301e-238	0
Oaz1	1.38771e-242	1.14358	0.84	0.131	1.74963e-238	0
AU021092	1.42896e-242	1.4494	0.765	0.1	1.80163e-238	0
Serpinh1	1.44861e-241	1.28782	0.714	0.072	1.8264e-237	0
Krtcap2	3.18406e-241	1.1089	0.737	0.082	4.01446e-237	0
Psma7	4.37554e-241	1.18164	0.813	0.117	5.51668e-237	0
Rps9	8.7484e-241	1.32372	0.966	0.244	1.103e-236	0
Cav2	1.11462e-240	1.32098	0.656	0.051	1.40531e-236	0
Rflnb	2.17123e-240	1.51863	0.704	0.072	2.73749e-236	0
Pde2a	3.94213e-240	1.32664	0.719	0.077	4.97024e-236	0
Map1lc3b	4.11873e-240	1.20566	0.784	0.101	5.19289e-236	0
Ifi27	1.77626e-239	1.34847	0.738	0.089	2.23951e-235	0
Rps12	4.04869e-239	1.37702	0.985	0.304	5.10459e-235	0
Prkch	5.11294e-239	1.42446	0.831	0.139	6.44639e-235	0
Pdgfb	1.21871e-238	1.44628	0.728	0.087	1.53655e-234	0
Dusp3	1.32538e-238	1.33079	0.735	0.084	1.67104e-234	0
Efnb2	5.28901e-238	1.38318	0.733	0.084	6.66839e-234	0
Ecscr	8.3876e-238	1.28552	0.703	0.072	1.05751e-233	0
Elob	8.45155e-238	1.11771	0.907	0.166	1.06557e-233	0
Tubb5	8.65812e-238	1.23263	0.704	0.072	1.09162e-233	0
Snrpg	1.41966e-237	1.06358	0.723	0.077	1.78991e-233	0
Eng	6.30148e-237	1.55676	0.947	0.249	7.9449e-233	0
Gapdh	4.52476e-236	1.12623	0.819	0.124	5.70482e-232	0
Rras	5.6871e-236	1.24745	0.698	0.069	7.1703e-232	0
Rapgef4	9.28126e-236	1.37564	0.834	0.14	1.17018e-231	0
Snx3	9.63942e-236	1.16159	0.818	0.123	1.21534e-231	0
Anxa3	1.6068e-235	1.17813	0.774	0.103	2.02586e-231	0
Actb	4.23089e-235	1.58192	0.995	0.522	5.33431e-231	0
Igfbp3	5.45394e-235	2.68245	0.765	0.14	6.87633e-231	0
Pcdh17	7.36497e-235	1.87198	0.729	0.1	9.28576e-231	0
Cnbp	8.42186e-235	1.13814	0.811	0.122	1.06183e-230	0
H2afz	2.65891e-234	1.13303	0.757	0.093	3.35235e-230	0
Rps20	3.49849e-234	1.32379	0.989	0.293	4.41089e-230	0
Clec14a	4.18868e-234	1.47926	0.656	0.056	5.28109e-230	0
Chrm3	4.56791e-234	1.9027	0.882	0.23	5.75922e-230	0
Rps19	5.43828e-234	1.43616	0.987	0.341	6.85658e-230	0
Ptprm	9.16155e-234	1.58139	0.936	0.249	1.15509e-229	0
B230219D22Rik	2.02974e-233	1.24391	0.703	0.074	2.55909e-229	0
Thbd	2.26439e-233	1.60009	0.654	0.057	2.85495e-229	0
Atp6v1g1	3.55979e-233	1.06454	0.73	0.084	4.48819e-229	0
Fam117b	5.48791e-233	1.33391	0.85	0.152	6.91916e-229	0
Ctla2a	7.86569e-233	1.61389	0.743	0.097	9.91707e-229	0
Arf1	2.1805e-232	1.13427	0.782	0.107	2.74918e-228	0
Fam43a	1.09484e-231	1.25288	0.606	0.037	1.38037e-227	0
Ndufb9	1.45133e-230	1.05237	0.765	0.101	1.82984e-226	0
Ctsl	6.82797e-230	1.15578	0.796	0.115	8.60871e-226	0
Gimap1	7.43921e-230	1.19726	0.722	0.082	9.37936e-226	0
Sh3bgrl3	9.51808e-230	1.05777	0.806	0.118	1.20004e-225	0
Gngt2	1.28597e-229	1.21991	0.723	0.084	1.62136e-225	0
Cox7a2	2.7782e-229	1.15159	0.902	0.181	3.50276e-225	0
Col4a1	1.20799e-228	1.48211	0.943	0.246	1.52303e-224	0
Rnf144a	1.4523e-228	1.32631	0.691	0.074	1.83106e-224	0
Gabarapl2	3.23382e-228	1.12782	0.731	0.088	4.0772e-224	0
Ndufa4	3.51562e-228	1.16337	0.925	0.192	4.43249e-224	0
Eef1b2	3.56875e-228	1.12101	0.767	0.104	4.49948e-224	0
Atp5j	3.7015e-228	1.07609	0.881	0.159	4.66685e-224	0
Tnfrsf1a	2.42842e-227	1.23526	0.631	0.05	3.06175e-223	0
Atox1	1.0247e-226	1.25513	0.925	0.206	1.29194e-222	0
Hint1	1.75709e-226	1.00347	0.829	0.13	2.21534e-222	0
Arpc1b	2.44177e-226	1.12182	0.763	0.105	3.07858e-222	0
Rpl36a	2.75169e-226	1.07296	0.9	0.173	3.46933e-222	0
Pomp	1.52514e-225	1.17622	0.762	0.107	1.9229e-221	0
Tuba1b	7.88642e-225	1.11996	0.697	0.076	9.9432e-221	0
Mrfap1	1.04764e-224	1.07432	0.699	0.076	1.32087e-220	0
Tmem88	1.25926e-224	1.32583	0.573	0.029	1.58767e-220	0
Hnrnpk	1.96094e-224	1.11211	0.79	0.12	2.47235e-220	0
Cox8a	2.85924e-224	1.2045	0.926	0.207	3.60492e-220	0
Gnb1	3.85274e-224	1.19573	0.91	0.191	4.85754e-220	0
Naca	4.57604e-224	1.11698	0.883	0.17	5.76948e-220	0
Meox1	6.87791e-224	1.24517	0.593	0.036	8.67167e-220	0
Edf1	1.00652e-223	1.0538	0.754	0.099	1.26902e-219	0
Tspan12	1.41646e-223	1.22959	0.684	0.074	1.78587e-219	0
Rasip1	2.21256e-223	1.15457	0.706	0.082	2.7896e-219	0
Rps2	1.1414e-222	1.24063	0.964	0.26	1.43908e-218	0
Kctd12	1.35662e-222	1.30253	0.604	0.043	1.71043e-218	0
Clic5	6.75118e-222	1.35745	0.873	0.184	8.51189e-218	0
Psma2	8.60018e-222	1.09299	0.687	0.074	1.08431e-217	0
S100a11	1.16206e-221	1.04128	0.783	0.118	1.46512e-217	0
Rplp0	1.51786e-221	1.11044	0.937	0.213	1.91372e-217	0
Mapk3	1.88063e-221	1.17845	0.646	0.059	2.3711e-217	0
Hsp90ab1	2.66748e-221	1.38116	0.975	0.318	3.36316e-217	0
Rps17	4.01954e-220	1.20551	0.938	0.223	5.06784e-216	0
Kctd12b	4.13229e-220	1.53818	0.598	0.044	5.21e-216	0
Cpd	4.78928e-220	1.1778	0.764	0.114	6.03832e-216	0
Tmsb10	6.44115e-220	1.1701	0.82	0.149	8.121e-216	0
Ndufc2	9.1994e-220	1.06589	0.714	0.088	1.15986e-215	0
Cox5a	1.19362e-219	0.948246	0.746	0.099	1.50491e-215	0
Ubl5	3.26932e-219	0.964527	0.769	0.109	4.12196e-215	0
Rpl4	5.00266e-219	1.09327	0.82	0.137	6.30736e-215	0
Fgd5	8.15789e-219	1.14278	0.784	0.122	1.02855e-214	0
Tbxa2r	8.18598e-219	1.35761	0.62	0.053	1.03209e-214	0
Snrk	1.31917e-218	1.27261	0.753	0.111	1.66321e-214	0
Fau	6.28245e-218	1.2648	0.997	0.488	7.92091e-214	0
Bri3	8.86596e-218	0.965962	0.764	0.11	1.11782e-213	0
Cldn15	2.17603e-217	1.22104	0.602	0.045	2.74353e-213	0
Hes1	2.3227e-217	1.67499	0.639	0.065	2.92846e-213	0
Hnrnpa0	2.45998e-217	1.03787	0.637	0.057	3.10155e-213	0
Ushbp1	2.55783e-217	1.13742	0.752	0.111	3.22491e-213	0
Myl12b	3.24007e-217	1.11058	0.905	0.185	4.08507e-213	0
Serf2	3.67248e-217	1.08343	0.939	0.216	4.63026e-213	0
Jun	5.9626e-217	1.59421	0.643	0.066	7.51765e-213	0
Ndufa1	6.40471e-216	0.981162	0.655	0.064	8.07506e-212	0
Rplp1	9.31234e-216	1.2244	0.995	0.435	1.1741e-211	0
Dysf	1.68505e-215	1.22823	0.815	0.144	2.12452e-211	0
Cox6b1	2.03722e-215	1.05309	0.867	0.164	2.56853e-211	0
Msn	4.0852e-215	1.10075	0.827	0.141	5.15062e-211	0
Rpl18a	4.2067e-215	1.29244	0.986	0.342	5.30381e-211	0
Tagln2	6.64441e-215	1.07207	0.764	0.115	8.37727e-211	0
Grasp	1.1459e-214	1.24169	0.547	0.028	1.44476e-210	0
Fmnl3	1.24778e-214	1.1626	0.726	0.102	1.5732e-210	0
Clic4	2.1218e-214	1.29235	0.922	0.223	2.67516e-210	0
Irx3	3.67238e-214	1.35509	0.548	0.027	4.63014e-210	0
Gnb2	3.98607e-213	1.06424	0.863	0.166	5.02563e-209	0
Ran	1.0625e-212	1.11144	0.607	0.05	1.3396e-208	0
Lgals9	4.09702e-212	1.238	0.61	0.052	5.16552e-208	0
Ldb2	8.90372e-212	1.44146	0.894	0.228	1.12258e-207	0
Rpl8	9.15289e-212	1.28656	0.983	0.319	1.154e-207	0
Arpc5	1.62949e-211	1.07012	0.68	0.079	2.05446e-207	0
Sh3glb1	4.29472e-211	1.11704	0.869	0.176	5.41478e-207	0
Ndufa7	1.4272e-210	1.08765	0.745	0.109	1.79941e-206	0
Nedd8	4.07365e-210	1.01005	0.735	0.103	5.13606e-206	0
Crip1	4.69038e-210	1.32986	0.788	0.144	5.91363e-206	0
Sub1	5.40822e-209	1.08772	0.643	0.066	6.81868e-205	0
Tprgl	6.63318e-209	1.09037	0.646	0.067	8.36311e-205	0
Rps27l	1.13752e-207	0.962971	0.711	0.093	1.43419e-203	0
Ndufb11	1.60913e-207	0.947522	0.706	0.096	2.02879e-203	0
2023-09-07	2.2834e-207	1.03934	0.737	0.11	2.87891e-203	0
Tuba1a	2.2659e-206	1.18953	0.626	0.062	2.85685e-202	0
Cox7c	3.46337e-206	1.02505	0.869	0.176	4.36662e-202	0
Tap2	1.76769e-205	1.09773	0.564	0.037	2.2287e-201	0
Gm12002	2.23652e-205	1.44908	0.513	0.021	2.81981e-201	0
Tgfbr2	1.39251e-204	1.22043	0.819	0.163	1.75568e-200	0
Ndufb1-ps	1.40875e-204	0.991823	0.701	0.092	1.77615e-200	0
Xaf1	1.58331e-204	1.18497	0.583	0.046	1.99624e-200	0
Cbfa2t3	1.77952e-204	1.15084	0.687	0.091	2.24362e-200	0
Rhoc	4.93508e-204	1.08515	0.675	0.084	6.22215e-200	0
Plscr1	5.44116e-204	1.16162	0.652	0.074	6.86021e-200	0
Heg1	9.3802e-204	1.20535	0.833	0.17	1.18266e-199	0
Rnasek	9.39235e-204	0.942094	0.742	0.111	1.18419e-199	0
3110099E03Rik	9.58688e-204	1.4731	0.515	0.024	1.20871e-199	0
Sec61g	1.14459e-203	0.945155	0.704	0.093	1.4431e-199	0
Slc50a1	1.99269e-203	1.12992	0.625	0.065	2.51239e-199	0
Bvht	2.29908e-202	1.1456	0.58	0.047	2.89868e-198	0
Tceal9	3.5656e-202	1.12655	0.577	0.044	4.49551e-198	0
Epas1	5.7133e-202	1.11704	0.924	0.233	7.20333e-198	0
Cox7a2l	1.65343e-201	0.943757	0.694	0.092	2.08465e-197	0
Ptpru	1.73295e-201	1.32744	0.581	0.05	2.1849e-197	0
Gimap5	1.74751e-201	1.12993	0.613	0.059	2.20326e-197	0
Atxn7l3b	2.23475e-201	1.08525	0.628	0.067	2.81757e-197	0
Tmem14c	2.27919e-201	0.971742	0.638	0.07	2.8736e-197	0
Clta	2.3291e-201	0.96101	0.781	0.132	2.93654e-197	0
Pura	3.24182e-201	1.0316	0.68	0.088	4.08729e-197	0
Grcc10	4.51108e-201	0.938372	0.68	0.086	5.68757e-197	0
Smdt1	6.2789e-201	0.937712	0.738	0.111	7.91643e-197	0
Eif5a	7.06019e-201	0.89816	0.704	0.095	8.90149e-197	0
Rpl21	9.68349e-201	1.21079	0.984	0.332	1.22089e-196	0
Rpl13	6.90101e-200	1.17609	0.993	0.462	8.70079e-196	0
Psmb1	1.47682e-199	0.937291	0.721	0.105	1.86197e-195	0
Arhgef15	2.21923e-199	1.00795	0.663	0.082	2.798e-195	0
Shank3	1.59347e-198	1.13401	0.654	0.08	2.00904e-194	0
Ltbp1	1.86547e-198	1.34718	0.669	0.092	2.35199e-194	0
Actg1	1.88079e-198	1.4482	0.903	0.249	2.37129e-194	0
Dad1	1.93537e-198	0.959554	0.695	0.095	2.44011e-194	0
Tmem140	4.02572e-198	1.0872	0.63	0.07	5.07562e-194	0
Sp100	8.00891e-198	1.18541	0.723	0.117	1.00976e-193	0
Hnrnpf	1.1873e-197	0.961537	0.725	0.11	1.49695e-193	0
Cdc14a	1.27928e-197	1.224	0.75	0.133	1.61292e-193	0
Atp6v1f	2.12162e-197	0.850718	0.68	0.087	2.67494e-193	0
Ywhae	2.9519e-197	0.947883	0.832	0.161	3.72175e-193	0
Ccrl2	4.44632e-197	1.13785	0.518	0.027	5.60593e-193	0
Ywhah	1.25236e-196	1.11118	0.585	0.053	1.57898e-192	0
Ctnnb1	5.79441e-196	0.948861	0.85	0.172	7.3056e-192	0
Ndufa8	9.19235e-196	0.897733	0.637	0.073	1.15897e-191	0
H2-T22	2.29902e-195	1.15127	0.556	0.043	2.89861e-191	0
Sap18	3.7167e-195	1.00963	0.578	0.051	4.68601e-191	0
Emc7	6.14238e-195	1.01699	0.593	0.057	7.74431e-191	0
Clec1a	1.56426e-194	1.20703	0.587	0.057	1.97222e-190	0
Dpm3	2.7655e-194	1.01449	0.606	0.063	3.48675e-190	0
Psenen	4.14891e-194	0.928179	0.601	0.059	5.23094e-190	0
Mal	4.5047e-194	1.41534	0.635	0.082	5.67952e-190	0
Ywhaq	5.04703e-194	0.913591	0.771	0.135	6.3633e-190	0
Irf7	7.20897e-194	1.23027	0.541	0.039	9.08907e-190	0
Dnaja1	1.1587e-193	1.06435	0.731	0.119	1.46089e-189	0
Gbp7	1.25458e-193	1.30974	0.558	0.047	1.58178e-189	0
Capza2	1.45311e-193	0.887589	0.645	0.077	1.83208e-189	0
Fzd4	2.90713e-193	1.13686	0.566	0.049	3.66531e-189	0
Rnaset2a	4.70512e-193	1.00684	0.618	0.068	5.93222e-189	0
Rpl36al	5.87577e-193	0.842796	0.746	0.126	7.40817e-189	0
Gabarap	1.44612e-192	0.936771	0.826	0.163	1.82327e-188	0
Sparcl1	1.85745e-192	1.87182	0.595	0.07	2.34187e-188	0
Trim30a	2.27874e-192	1.22179	0.591	0.062	2.87303e-188	0
Rheb	2.30995e-192	0.903583	0.683	0.095	2.91239e-188	0
Amotl1	2.86135e-192	1.08638	0.622	0.072	3.6076e-188	0
Atp5h	3.31361e-192	0.94924	0.874	0.189	4.17781e-188	0
Arap3	4.37342e-192	1.04048	0.622	0.071	5.51401e-188	0
Plekho1	4.37915e-192	1.04788	0.582	0.055	5.52123e-188	0
Tmem176b	4.43282e-192	1.06942	0.774	0.139	5.5889e-188	0
Shisa5	6.31986e-192	0.978584	0.656	0.084	7.96808e-188	0
Tmed9	1.53177e-191	0.853461	0.658	0.082	1.93126e-187	0
Lats2	1.79469e-191	0.955338	0.636	0.076	2.26274e-187	0
Slfn2	1.98115e-191	1.32106	0.546	0.044	2.49784e-187	0
Pfdn5	8.7255e-191	0.905393	0.86	0.185	1.10011e-186	0
Cox17	1.52224e-190	0.954962	0.637	0.077	1.91924e-186	0
Npm1	1.5742e-190	0.920412	0.661	0.088	1.98475e-186	0
Klf13	1.65274e-190	1.00921	0.736	0.123	2.08377e-186	0
Grrp1	1.81078e-190	1.09418	0.533	0.037	2.28303e-186	0
Psmb6	1.98821e-190	0.900261	0.634	0.076	2.50674e-186	0
Ece1	3.33427e-190	0.933191	0.809	0.155	4.20385e-186	0
Samd12	3.45569e-190	1.41886	0.737	0.137	4.35694e-186	0
Srp14	5.50153e-190	0.966254	0.585	0.057	6.93633e-186	0
Anp32a	9.36711e-190	0.922736	0.742	0.122	1.18101e-185	0
Rassf9	1.52736e-189	1.30214	0.503	0.028	1.9257e-185	0
Zfand5	1.59145e-189	1.01231	0.643	0.081	2.0065e-185	0
Parp14	2.80432e-189	1.16617	0.58	0.058	3.53568e-185	0
Rnf7	2.03866e-188	0.947042	0.591	0.061	2.57034e-184	0
Prdx1	2.29116e-188	0.978594	0.888	0.215	2.8887e-184	0
Sec61b	2.72582e-188	0.917896	0.587	0.059	3.43671e-184	0
Psmb3	2.76548e-188	0.873152	0.705	0.108	3.48672e-184	0
Arpc2	4.30715e-188	0.998662	0.845	0.181	5.43045e-184	0
F11r	4.65356e-188	0.931584	0.791	0.15	5.86721e-184	0
Atp5j2	5.74579e-188	0.902146	0.866	0.187	7.24429e-184	0
Npc2	2.78409e-187	0.853066	0.65	0.086	3.51019e-183	0
H2afv	6.09088e-187	0.907969	0.655	0.089	7.67938e-183	0
Irf1	1.09121e-186	1.088	0.537	0.042	1.37579e-182	0
Ripply3	3.00715e-185	1.08873	0.487	0.025	3.79141e-181	0
Slc25a4	4.03661e-185	0.872565	0.673	0.097	5.08936e-181	0
S1pr1	6.27435e-185	1.16535	0.557	0.052	7.9107e-181	0
Cmpk2	6.7918e-185	1.1126	0.512	0.034	8.56311e-181	0
Luzp1	8.46541e-185	0.993496	0.812	0.172	1.06732e-180	0
Chmp2a	1.69656e-184	0.901441	0.728	0.121	2.13903e-180	0
Aplp2	1.76015e-184	1.06326	0.902	0.228	2.21919e-180	0
Notch1	2.03398e-184	1.08981	0.64	0.085	2.56444e-180	0
Atp5g2	3.28522e-184	0.839143	0.757	0.133	4.142e-180	0
Morf4l1	4.04776e-184	0.928189	0.735	0.126	5.10342e-180	0
Prdx2	5.4353e-184	0.879926	0.614	0.073	6.85283e-180	0
Tjp1	7.372e-184	0.997238	0.778	0.151	9.29461e-180	0
Snrpe	8.88472e-184	0.965792	0.568	0.055	1.12019e-179	0
Rbx1	3.07291e-183	0.818626	0.762	0.137	3.87432e-179	0
Adgre5	1.27591e-182	1.00659	0.626	0.08	1.60866e-178	0
Rpl36	1.30366e-182	1.10157	0.984	0.372	1.64366e-178	0
Eif3f	1.31875e-182	0.819681	0.657	0.092	1.66268e-178	0
Cox6c	1.56926e-182	0.909064	0.914	0.224	1.97853e-178	0
Ddah2	8.3746e-182	1.05473	0.519	0.039	1.05587e-177	0
Rpl14	1.48704e-181	0.927407	0.916	0.232	1.87486e-177	0
Spcs2	2.61291e-181	0.876803	0.589	0.064	3.29436e-177	0
Sdcbp	6.29888e-181	0.894801	0.593	0.067	7.94163e-177	0
Mcc	7.13115e-181	1.21972	0.808	0.187	8.99095e-177	0
Psmb5	2.343e-180	0.840857	0.588	0.064	2.95405e-176	0
Efna1	4.59309e-180	0.917248	0.636	0.086	5.79097e-176	0
Tpm4	6.49293e-180	0.983337	0.674	0.103	8.18628e-176	0
Rer1	1.91599e-179	0.887612	0.564	0.057	2.41568e-175	0
Drap1	2.41386e-179	0.934235	0.562	0.056	3.04339e-175	0
Pttg1	2.58669e-179	0.928022	0.557	0.054	3.2613e-175	0
Tomm6	3.03371e-179	0.841356	0.67	0.101	3.8249e-175	0
Rpl5	3.08791e-179	0.95361	0.9	0.234	3.89324e-175	0
Ybx1	1.33369e-178	0.886947	0.87	0.202	1.68151e-174	0
Tmed10	1.69466e-178	0.878064	0.702	0.113	2.13662e-174	0
Myo1c	2.87973e-178	0.951616	0.686	0.112	3.63076e-174	0
Cdc42ep1	5.91014e-178	1.04008	0.549	0.053	7.4515e-174	0
Bnip3l	6.14146e-178	0.932784	0.657	0.099	7.74316e-174	0
Uqcrh	1.22438e-177	0.817618	0.79	0.156	1.54369e-173	0
Tspan15	5.32093e-177	0.982446	0.563	0.059	6.70863e-173	0
Rhoj	7.03149e-177	1.00201	0.634	0.09	8.8653e-173	0
Tubb4b	9.2431e-177	0.878621	0.587	0.067	1.16537e-172	0
Tpst2	1.80128e-176	0.934486	0.588	0.069	2.27106e-172	0
Rtp4	2.65507e-176	1.086	0.506	0.037	3.34752e-172	0
Cdc42ep2	2.8659e-176	0.966388	0.536	0.049	3.61332e-172	0
Xiap	3.60114e-176	0.946371	0.725	0.132	4.54032e-172	0
Hras	5.84962e-176	0.825528	0.604	0.075	7.3752e-172	0
Mef2a	1.3318e-175	0.997691	0.816	0.185	1.67913e-171	0
Lamp1	1.69791e-175	0.845956	0.86	0.198	2.14072e-171	0
Saraf	2.04628e-175	0.765389	0.632	0.087	2.57996e-171	0
Cox5b	2.08604e-175	0.824153	0.819	0.172	2.63008e-171	0
Sppl2a	2.48795e-175	0.937025	0.618	0.082	3.1368e-171	0
Phf11d	3.79211e-175	1.21239	0.472	0.027	4.78109e-171	0
Slc3a2	3.96562e-175	1.02042	0.592	0.072	4.99986e-171	0
Cox6a1	4.51509e-175	0.825909	0.772	0.149	5.69262e-171	0
Tma7	7.46605e-175	0.791249	0.596	0.073	9.4132e-171	0
Atp5l	9.70301e-175	0.81535	0.853	0.187	1.22336e-170	0
Ltbp4	1.56581e-174	1.07778	0.674	0.114	1.97417e-170	0
Ndufb3	3.44007e-174	0.86123	0.571	0.062	4.33724e-170	0
Rab14	3.75579e-174	0.838171	0.748	0.139	4.73529e-170	0
Jam2	5.31663e-174	1.07742	0.519	0.044	6.70321e-170	0
Pnrc1	7.57061e-174	0.855132	0.573	0.064	9.54502e-170	0
Pcbp1	1.12155e-173	0.837355	0.603	0.077	1.41404e-169	0
Gm10076	1.31491e-173	0.903722	0.848	0.191	1.65783e-169	0
Trim47	1.56105e-173	0.97242	0.558	0.061	1.96818e-169	0
Serbp1	1.56713e-173	0.889392	0.77	0.157	1.97584e-169	0
Sypl	3.61155e-173	0.873278	0.712	0.125	4.55345e-169	0
Tmem30a	6.47057e-173	0.81803	0.761	0.148	8.1581e-169	0
Eif3k	1.73154e-172	0.82948	0.604	0.076	2.18312e-168	0
Ppp1r11	2.11845e-172	0.896669	0.529	0.048	2.67094e-168	0
Ptbp3	2.84511e-172	0.854933	0.721	0.131	3.58711e-168	0
Pmp22	3.12719e-172	0.958732	0.49	0.035	3.94276e-168	0
Trim37	3.93724e-172	0.855975	0.593	0.073	4.96407e-168	0
F2r	6.30798e-172	1.14121	0.552	0.06	7.9531e-168	0
S100a6	7.57907e-172	1.36383	0.712	0.152	9.55569e-168	0
Chmp5	9.93001e-172	0.868392	0.576	0.067	1.25198e-167	0
Psmb2	2.39542e-171	0.748338	0.629	0.088	3.02014e-167	0
Psma3	2.4801e-171	0.802095	0.704	0.123	3.12691e-167	0
Tmed5	4.1985e-171	0.945812	0.517	0.045	5.29347e-167	0
Mgll	6.03525e-171	1.16372	0.786	0.182	7.60924e-167	0
Rnaset2b	6.59466e-171	0.952203	0.549	0.058	8.31455e-167	0
Akt3	8.0526e-171	1.04071	0.645	0.102	1.01527e-166	0
Cyp20a1	1.17952e-170	0.972313	0.573	0.069	1.48714e-166	0
Reep3	1.66115e-170	0.938576	0.795	0.171	2.09437e-166	0
Mfge8	1.85797e-170	0.830486	0.715	0.132	2.34253e-166	0
Dnm3	2.50522e-170	1.06861	0.833	0.204	3.15858e-166	0
1700025G04Rik	2.74661e-170	1.11721	0.541	0.058	3.46293e-166	0
Sox17	3.25098e-170	1.4201	0.6	0.087	4.09883e-166	0
Tbca	3.55022e-170	0.817782	0.596	0.076	4.47611e-166	0
Adgrl2	6.68119e-170	1.05259	0.791	0.176	8.42365e-166	0
Tpm3	7.47188e-170	0.867645	0.812	0.182	9.42054e-166	0
Smim11	2.07338e-169	0.964806	0.498	0.04	2.61412e-165	0
Sptssa	2.70895e-169	0.961068	0.578	0.072	3.41544e-165	0
Apoe	3.03878e-169	1.2962	0.779	0.193	3.8313e-165	0
Epha4	5.30518e-169	1.19789	0.51	0.046	6.68877e-165	0
Adam10	7.73849e-169	0.85162	0.691	0.119	9.75668e-165	0
Dek	7.84904e-169	0.938295	0.56	0.065	9.89608e-165	0
Set	8.02547e-169	0.881455	0.587	0.076	1.01185e-164	0
Snu13	1.12421e-168	0.896859	0.517	0.046	1.4174e-164	0
Prex2	1.42932e-168	0.999217	0.82	0.193	1.80209e-164	0
Uqcc2	1.45324e-168	0.858306	0.689	0.118	1.83225e-164	0
Cetn3	1.46756e-168	0.860775	0.541	0.057	1.8503e-164	0
Isg15	1.55467e-168	1.56496	0.459	0.028	1.96013e-164	0
Erg	9.52835e-168	0.978238	0.655	0.109	1.20133e-163	0
She	1.61039e-167	0.902295	0.527	0.052	2.03038e-163	0
Ywhaz	2.51493e-167	0.852476	0.772	0.161	3.17082e-163	0
Syf2	2.55608e-167	0.740418	0.617	0.087	3.22271e-163	0
Pdia6	2.94662e-167	0.820033	0.597	0.078	3.7151e-163	0
Arhgap29	2.96633e-167	0.865369	0.797	0.178	3.73995e-163	0
Ephb4	2.99299e-167	0.940978	0.56	0.066	3.77356e-163	0
Itm2c	5.17259e-167	0.954151	0.485	0.036	6.5216e-163	0
Klf4	7.97611e-167	1.30973	0.487	0.039	1.00563e-162	0
Cd24a	8.71304e-167	1.19128	0.6	0.087	1.09854e-162	0
Bloc1s1	1.80179e-166	0.837263	0.603	0.084	2.2717e-162	0
Pdcd5	1.0955e-165	0.864896	0.51	0.047	1.3812e-161	0
Vdac2	1.40725e-165	0.769991	0.618	0.087	1.77426e-161	0
Lrrc8a	2.46352e-165	0.885269	0.549	0.061	3.10601e-161	0
Tax1bp3	5.79111e-165	0.91539	0.489	0.039	7.30143e-161	0
Abi3	1.05241e-164	0.908463	0.483	0.038	1.32687e-160	0
Lama4	1.21035e-164	1.13302	0.533	0.059	1.52601e-160	0
Vdac3	1.44775e-164	0.821703	0.587	0.078	1.82532e-160	0
Dctn3	1.72156e-164	0.775084	0.524	0.052	2.17054e-160	0
Fyn	1.05737e-163	0.896086	0.635	0.1	1.33313e-159	0
Col15a1	1.17471e-163	1.15557	0.542	0.064	1.48107e-159	0
Atp6v0e	1.3778e-163	0.758461	0.646	0.103	1.73713e-159	0
Fli1	2.64413e-163	0.999536	0.822	0.207	3.33372e-159	0
Mrpl33	7.81345e-163	0.809896	0.565	0.07	9.8512e-159	0
Spcs1	9.88386e-163	0.823895	0.523	0.053	1.24616e-158	0
Ndufb8	1.45093e-162	0.640538	0.638	0.097	1.82933e-158	0
Ccdc85a	5.80071e-162	1.20982	0.437	0.023	7.31354e-158	0
Atp5md	7.07259e-162	0.724575	0.652	0.106	8.91712e-158	0
Npr3	1.04586e-161	1.82925	0.5	0.052	1.31862e-157	0
Ssr4	1.37549e-161	0.717253	0.571	0.072	1.73422e-157	0
Dnajc3	1.5478e-161	0.805782	0.662	0.113	1.95147e-157	0
Ppp1ca	1.88099e-161	0.699507	0.721	0.138	2.37155e-157	0
Klf3	2.33294e-161	0.881926	0.704	0.134	2.94137e-157	0
Pdcd10	4.48716e-161	0.805896	0.544	0.063	5.65741e-157	0
Timm10b	4.77839e-161	0.797035	0.529	0.058	6.02459e-157	0
Entpd1	8.30117e-161	0.970353	0.507	0.051	1.04661e-156	0
Serinc1	1.57429e-160	0.800912	0.607	0.09	1.98486e-156	0
Hsbp1	2.0864e-160	0.759894	0.576	0.077	2.63053e-156	0
D8Ertd738e	3.77736e-160	0.721431	0.718	0.138	4.76249e-156	0
Rpl22l1	4.19707e-160	0.82391	0.574	0.076	5.29167e-156	0
Taldo1	8.15075e-160	0.720051	0.627	0.097	1.02765e-155	0
Dlc1	8.95855e-160	1.02334	0.88	0.255	1.12949e-155	0
Rpl38	2.80613e-159	0.977452	0.983	0.366	3.53797e-155	0
Snrpf	4.01945e-159	0.776226	0.508	0.05	5.06772e-155	0
Abhd17a	5.85382e-159	0.823478	0.535	0.061	7.3805e-155	0
Slc38a2	7.56617e-159	0.915844	0.586	0.084	9.53943e-155	0
Ctsz	7.83131e-159	0.80012	0.621	0.097	9.87371e-155	0
Ccnd2	8.43269e-159	0.968435	0.553	0.072	1.06319e-154	0
Higd2a	1.82857e-158	0.857865	0.49	0.044	2.30546e-154	0
Smpdl3a	1.96873e-158	0.853884	0.587	0.084	2.48218e-154	0
Bcap31	2.29258e-158	0.723012	0.534	0.06	2.89049e-154	0
Romo1	2.71703e-158	0.755175	0.587	0.082	3.42564e-154	0
BC028528	3.74063e-158	0.887777	0.441	0.027	4.71619e-154	0
Ndufa6	4.657e-158	0.650527	0.638	0.104	5.87155e-154	0
Polr2e	6.2751e-158	0.720737	0.546	0.065	7.91164e-154	0
Eif4g2	7.61498e-158	0.783729	0.833	0.201	9.60096e-154	0
Dpysl2	8.25617e-158	0.789479	0.566	0.074	1.04094e-153	0
Nol7	1.08259e-157	0.879016	0.51	0.052	1.36494e-153	0
Pea15a	1.09801e-157	0.771939	0.549	0.068	1.38437e-153	0
Slc25a5	1.27208e-157	0.776529	0.651	0.111	1.60384e-153	0
Rab18	1.46165e-157	0.731653	0.55	0.067	1.84285e-153	0
Cdk2ap1	2.81363e-157	0.836875	0.491	0.046	3.54743e-153	0
Upp1	2.95656e-157	0.94371	0.444	0.028	3.72763e-153	0
Ldha	3.06684e-157	0.748953	0.717	0.142	3.86667e-153	0
Pltp	5.06981e-157	1.11117	0.442	0.028	6.39202e-153	0
Fbxl7	5.26132e-157	1.23608	0.709	0.157	6.63347e-153	0
Dynlrb1	5.36007e-157	0.75192	0.582	0.081	6.75797e-153	0
Sfr1	7.60451e-157	0.80774	0.513	0.054	9.58777e-153	0
Rbm8a	8.81838e-157	0.786971	0.529	0.061	1.11182e-152	0
Hnrnpa3	2.37164e-156	0.771321	0.739	0.156	2.99016e-152	0
Hip1	3.38481e-156	0.907808	0.784	0.186	4.26756e-152	0
F8	4.74338e-156	1.13281	0.535	0.068	5.98045e-152	0
Camk1	6.73646e-156	0.905706	0.5	0.051	8.49333e-152	0
Reep5	9.74293e-156	0.745349	0.581	0.082	1.22839e-151	0
Gbp2	2.32534e-155	1.07348	0.419	0.021	2.93179e-151	0
Mxd4	2.5962e-155	0.750963	0.769	0.171	3.27329e-151	0
Sav1	3.22198e-155	0.77662	0.509	0.052	4.06227e-151	0
Psmb4	3.40276e-155	0.661124	0.595	0.088	4.2902e-151	0
Ndufa13	4.39728e-155	0.625085	0.735	0.146	5.54409e-151	0
Inpp4b	4.88002e-155	1.128	0.644	0.121	6.15273e-151	0
Stom	5.29395e-155	0.95723	0.45	0.033	6.67461e-151	0
Smagp	5.51702e-155	0.754857	0.555	0.072	6.95586e-151	0
Tmbim1	1.09931e-154	0.863542	0.476	0.042	1.38601e-150	0
Plxnd1	1.10001e-154	0.899047	0.619	0.103	1.38689e-150	0
Tmed2	1.14338e-154	0.744572	0.607	0.094	1.44158e-150	0
Ptges3	7.00467e-154	0.759768	0.634	0.108	8.83148e-150	0
Cav1	1.12343e-153	0.890962	0.513	0.057	1.41642e-149	0
St6galnac3	1.16456e-153	0.910574	0.754	0.176	1.46828e-149	0
Ginm1	1.18977e-153	0.850724	0.459	0.037	1.50006e-149	0
Sbds	2.00101e-153	0.846878	0.511	0.057	2.52287e-149	0
Ttc28	2.60369e-153	0.920049	0.692	0.145	3.28274e-149	0
Ptp4a3	2.76499e-153	0.954235	0.482	0.047	3.48609e-149	0
Dazap2	2.8076e-153	0.749988	0.551	0.073	3.53982e-149	0
Ubxn1	3.42751e-153	0.626625	0.609	0.095	4.32141e-149	0
Hspa8	3.99042e-153	1.02115	0.944	0.335	5.03112e-149	0
Zfp366	1.03571e-152	1.00254	0.512	0.06	1.30583e-148	0
Trir	1.27905e-152	0.656309	0.693	0.133	1.61263e-148	0
Fam171a1	1.28296e-152	0.842766	0.659	0.122	1.61755e-148	0
Ifit3	1.81811e-152	1.24418	0.48	0.047	2.29228e-148	0
Eif4h	2.82185e-152	0.676331	0.587	0.088	3.55779e-148	0
Iigp1	2.94238e-152	1.47219	0.481	0.049	3.70975e-148	0
Jam3	2.98377e-152	0.958966	0.524	0.065	3.76194e-148	0
Prdx4	3.39278e-152	0.86077	0.459	0.037	4.27761e-148	0
Adarb1	2.12533e-151	0.952003	0.465	0.042	2.67962e-147	0
Tgfb1	2.383e-151	0.876449	0.555	0.076	3.00449e-147	0
Eid1	7.21882e-151	0.786397	0.486	0.049	9.10149e-147	0
6430548M08Rik	8.79494e-151	0.918914	0.441	0.032	1.10887e-146	0
Ssb	1.21002e-150	0.762314	0.614	0.102	1.52559e-146	0
Bmpr2	1.42974e-150	0.879636	0.767	0.178	1.80262e-146	0
Tmem184b	1.61726e-150	0.875912	0.459	0.039	2.03904e-146	0
Rab11a	2.12962e-150	0.726494	0.628	0.108	2.68503e-146	0
Aldoa	2.78114e-150	0.781735	0.784	0.185	3.50646e-146	0
Paip2	3.34306e-150	0.732961	0.619	0.103	4.21493e-146	0
Actr2	3.62089e-150	0.799638	0.591	0.092	4.56522e-146	0
Ciao2b	4.17269e-150	0.792455	0.438	0.031	5.26092e-146	0
Tmem256	5.21303e-150	0.621196	0.587	0.088	6.57258e-146	0
Sh2d3c	7.02473e-150	0.919067	0.439	0.032	8.85677e-146	0
Mospd2	9.54205e-150	0.930409	0.515	0.063	1.20306e-145	0
Psma5	1.32312e-149	0.741903	0.5	0.054	1.66818e-145	0
Atp5f1	1.34622e-149	0.642968	0.649	0.115	1.69732e-145	0
Ehd2	1.84387e-149	0.807322	0.509	0.059	2.32475e-145	0
Lrrc3b	2.09773e-149	1.08529	0.422	0.027	2.64482e-145	0
Tapbp	2.66036e-149	0.842947	0.671	0.132	3.35418e-145	0
Tmco1	5.23092e-149	0.781129	0.53	0.067	6.59515e-145	0
H2-Q6	5.78387e-149	0.767242	0.626	0.109	7.29231e-145	0
Dstn	8.2941e-149	0.640846	0.647	0.118	1.04572e-144	0
Snrpd2	1.17045e-148	0.756659	0.511	0.061	1.4757e-144	0
Bzw1	1.29194e-148	0.751783	0.507	0.059	1.62888e-144	0
Yipf4	1.33449e-148	0.717082	0.51	0.059	1.68253e-144	0
Jund	1.45927e-148	1.03282	0.613	0.109	1.83985e-144	0
Eif3h	1.59738e-148	0.728293	0.598	0.095	2.01398e-144	0
Mapre1	1.75531e-148	0.83018	0.502	0.058	2.21309e-144	0
Mtdh	2.2932e-148	0.870214	0.813	0.214	2.89126e-144	0
Rtn4	2.98003e-148	0.705648	0.668	0.126	3.75722e-144	0
Ccdc12	4.97646e-148	0.610327	0.608	0.099	6.27433e-144	0
Med28	5.47257e-148	0.69864	0.54	0.072	6.89982e-144	0
Pgrmc1	7.23604e-148	0.73074	0.491	0.052	9.1232e-144	0
Fundc2	7.42797e-148	0.798148	0.485	0.051	9.36519e-144	0
Vps29	8.96364e-148	0.715608	0.519	0.064	1.13014e-143	0
Srsf9	3.20686e-147	0.717945	0.448	0.036	4.04321e-143	0
Dhrs7	5.43378e-147	0.811286	0.431	0.031	6.85091e-143	0
Ifngr1	6.06105e-147	0.674546	0.519	0.064	7.64177e-143	0
S100a1	6.08172e-147	0.776481	0.605	0.102	7.66783e-143	0
Eef1g	7.03361e-147	0.726938	0.655	0.122	8.86797e-143	0
Dll4	7.87856e-147	0.9326	0.447	0.038	9.93328e-143	0
Nxpe4	1.07439e-146	0.93676	0.46	0.043	1.35459e-142	0
Polr2f	1.13945e-146	0.729198	0.494	0.055	1.43662e-142	0
Ndufa5	2.26252e-146	0.688155	0.579	0.089	2.85259e-142	0
Gtf2h5	2.54788e-146	0.78391	0.437	0.034	3.21237e-142	0
Txndc17	4.50836e-146	0.6644	0.568	0.084	5.68414e-142	0
Swi5	1.0151e-145	0.654392	0.551	0.077	1.27983e-141	0
Dync1i2	1.11704e-145	0.830348	0.664	0.132	1.40837e-141	0
Leprot	1.40624e-145	0.800758	0.513	0.063	1.77299e-141	0
Cggbp1	2.29368e-145	0.833202	0.484	0.053	2.89187e-141	0
Tspan9	2.53289e-145	0.686757	0.816	0.202	3.19347e-141	0
Brk1	3.76597e-145	0.63308	0.602	0.097	4.74814e-141	0
Etl4	3.9148e-145	1.04499	0.833	0.243	4.93578e-141	0
BC031181	1.12449e-144	0.638343	0.529	0.069	1.41776e-140	0
Sf3b6	1.14223e-144	0.700509	0.502	0.059	1.44012e-140	0
Qk	1.15067e-144	0.837795	0.842	0.227	1.45076e-140	0
Tmem176a	1.44405e-144	0.823073	0.714	0.155	1.82066e-140	0
Vezf1	1.84349e-144	0.79381	0.495	0.057	2.32427e-140	0
Mcl1	2.20974e-144	0.730446	0.611	0.105	2.78604e-140	0
Hypk	2.44529e-144	0.673954	0.549	0.078	3.08302e-140	0
Ndufs5	2.73344e-144	0.726507	0.449	0.039	3.44632e-140	0
Hyal2	6.24234e-144	0.773249	0.448	0.039	7.87035e-140	0
Ahnak	7.20277e-144	0.769423	0.753	0.175	9.08126e-140	0
Ier3ip1	7.20634e-144	0.745414	0.522	0.069	9.08575e-140	0
Wasf2	7.27989e-144	0.735397	0.837	0.224	9.17849e-140	0
Cwc15	1.73823e-143	0.690826	0.512	0.063	2.19156e-139	0
Selenop	1.75912e-143	0.696398	0.709	0.154	2.2179e-139	0
Cpne8	1.80942e-143	0.806806	0.542	0.079	2.28132e-139	0
Arl1	2.90443e-143	0.70912	0.462	0.046	3.66191e-139	0
Mtch1	3.28811e-143	0.705788	0.724	0.161	4.14565e-139	0
Phlpp1	3.81389e-143	0.986972	0.732	0.179	4.80855e-139	0
Eif3c	3.8569e-143	0.689848	0.593	0.1	4.86278e-139	0
Nmi	4.40012e-143	0.803623	0.457	0.044	5.54767e-139	0
Bax	8.76409e-143	0.623365	0.557	0.081	1.10498e-138	0
Sema7a	8.89215e-143	0.973252	0.404	0.025	1.12112e-138	0
Arf4	1.07099e-142	0.714245	0.614	0.109	1.3503e-138	0
Vps28	1.44928e-142	0.786556	0.472	0.05	1.82725e-138	0
Nck1	1.68566e-142	0.758725	0.592	0.099	2.12528e-138	0
Irf2bpl	2.04139e-142	0.879278	0.418	0.031	2.57379e-138	0
Bcam	2.06047e-142	0.655948	0.636	0.118	2.59784e-138	0
Ube2i	2.06536e-142	0.621956	0.596	0.099	2.604e-138	0
Nova2	3.21654e-142	0.934416	0.411	0.029	4.05542e-138	0
Tmem165	5.54782e-142	0.807682	0.445	0.04	6.99469e-138	0
Eif1b	8.41687e-142	0.731068	0.459	0.046	1.0612e-137	0
Chst15	8.88474e-142	0.899442	0.401	0.025	1.12019e-137	0
Manf	1.20094e-141	0.718131	0.491	0.058	1.51415e-137	0
Oasl2	1.76408e-141	0.988902	0.426	0.034	2.22416e-137	0
Slc25a3	1.94823e-141	0.625177	0.726	0.16	2.45633e-137	0
Eif3i	5.41711e-141	0.724344	0.452	0.043	6.82989e-137	0
Hnrnpab	7.22466e-141	0.728046	0.493	0.059	9.10886e-137	0
Pak2	7.56144e-141	0.730438	0.684	0.145	9.53347e-137	0
Acvrl1	1.42452e-140	0.700481	0.543	0.081	1.79603e-136	0
Unc50	2.00983e-140	0.769378	0.409	0.028	2.53399e-136	0
Bnip2	2.44498e-140	0.701942	0.599	0.104	3.08263e-136	0
Cox7b	2.88635e-140	0.604373	0.595	0.099	3.63911e-136	0
Txnl1	2.97554e-140	0.69966	0.461	0.047	3.75156e-136	0
Acer2	8.63073e-140	0.896331	0.496	0.063	1.08816e-135	0
Lamtor2	1.05833e-139	0.765801	0.446	0.043	1.33434e-135	0
Map4k4	1.60802e-139	0.745489	0.622	0.118	2.02739e-135	0
Ehd3	2.189e-139	0.818558	0.56	0.093	2.75989e-135	0
Zeb1	6.8109e-139	0.841904	0.721	0.171	8.58719e-135	0
Aurkaip1	8.87588e-139	0.701437	0.461	0.048	1.11907e-134	0
Rwdd1	1.16989e-138	0.759974	0.482	0.058	1.47499e-134	0
Rpl41	1.18406e-138	0.85266	0.994	0.506	1.49286e-134	0
B3gnt2	1.48722e-138	0.775786	0.636	0.126	1.87508e-134	0
Cnih4	1.69063e-138	0.746183	0.449	0.044	2.13155e-134	0
Sft2d1	1.89408e-138	0.809755	0.451	0.046	2.38806e-134	0
Tm9sf3	1.97076e-138	0.683034	0.647	0.129	2.48473e-134	0
Srp9	2.16087e-138	0.686334	0.461	0.048	2.72442e-134	0
H1f0	2.82882e-138	0.859911	0.51	0.07	3.56658e-134	0
Rpl31	1.14726e-137	0.665888	0.866	0.238	1.44647e-133	0
Nme2	1.24577e-137	0.60193	0.824	0.217	1.57067e-133	0
Sdf4	1.40768e-137	0.644844	0.555	0.087	1.7748e-133	0
Eif4a1	1.70219e-137	0.594865	0.627	0.118	2.14612e-133	0
Cdc37	2.09393e-137	0.661346	0.54	0.081	2.64003e-133	0
Srsf7	3.67598e-137	0.633495	0.568	0.093	4.63468e-133	0
Sumo1	5.23022e-137	0.632184	0.57	0.093	6.59427e-133	0
Oaz2	5.45733e-137	0.827442	0.516	0.074	6.8806e-133	0
Pls3	7.78288e-137	0.750666	0.559	0.091	9.81266e-133	0
Tmod3	8.42438e-137	0.664355	0.554	0.088	1.06215e-132	0
Snapc5	8.98213e-137	0.76738	0.404	0.029	1.13247e-132	0
Efnb1	9.6956e-137	0.901836	0.428	0.039	1.22242e-132	0
Map7d1	1.06931e-136	0.701413	0.484	0.059	1.34819e-132	0
Caskin2	1.1893e-136	0.76829	0.468	0.054	1.49946e-132	0
Atp6v0c	1.3005e-136	0.48068	0.798	0.197	1.63968e-132	0
Atp5b	1.32475e-136	0.657635	0.866	0.24	1.67025e-132	0
Palmd	4.1535e-136	0.859713	0.433	0.041	5.23673e-132	0
Erh	5.12483e-136	0.711556	0.432	0.04	6.46138e-132	0
Rtraf	6.01716e-136	0.642976	0.502	0.066	7.58643e-132	0
Ranbp1	6.71884e-136	0.713581	0.461	0.051	8.47111e-132	0
Calr	7.81387e-136	0.695768	0.679	0.146	9.85173e-132	0
Pttg1ip	8.20331e-136	0.550645	0.647	0.13	1.03427e-131	0
Sema6a	8.77569e-136	0.761051	0.691	0.156	1.10644e-131	0
Fas	1.24245e-135	0.778935	0.493	0.065	1.56648e-131	0
Supt4a	1.57224e-135	0.737489	0.422	0.037	1.98228e-131	0
Polr1d	3.43139e-135	0.518742	0.551	0.086	4.3263e-131	0
Polr2j	3.46921e-135	0.669914	0.441	0.044	4.37398e-131	0
Vamp3	4.09179e-135	0.756816	0.422	0.037	5.15892e-131	0
Tmem160	4.14634e-135	0.710011	0.48	0.06	5.2277e-131	0
Inka1	4.35661e-135	0.802933	0.369	0.018	5.49281e-131	0
Scarb1	4.99466e-135	0.853377	0.461	0.054	6.29726e-131	0
Tspan4	5.09577e-135	0.635724	0.499	0.066	6.42475e-131	0
Pnp	7.50442e-135	0.801569	0.406	0.031	9.46157e-131	0
Nop10	1.08971e-134	0.728452	0.453	0.049	1.3739e-130	0
Sugt1	1.56471e-134	0.682963	0.516	0.074	1.97279e-130	0
Rab11b	1.71193e-134	0.623815	0.52	0.076	2.1584e-130	0
Pim3	2.23681e-134	0.75632	0.473	0.058	2.82017e-130	0
Ptgs1	2.68527e-134	0.844649	0.414	0.035	3.38558e-130	0
Cct7	7.10804e-134	0.635501	0.481	0.059	8.96181e-130	0
Tomm22	8.04911e-134	0.650906	0.465	0.054	1.01483e-129	0
Crispld1	1.295e-133	0.960941	0.393	0.029	1.63273e-129	0
Mrps14	1.33189e-133	0.6331	0.458	0.051	1.67925e-129	0
Ndufb4	1.67981e-133	0.679738	0.463	0.054	2.1179e-129	0
Stard8	1.72743e-133	0.636065	0.571	0.1	2.17794e-129	0
Sh3bp5	2.30597e-133	0.761667	0.737	0.181	2.90737e-129	0
Flt4	2.62665e-133	0.798495	0.413	0.035	3.31168e-129	0
Sumo3	3.1828e-133	0.767303	0.444	0.047	4.01287e-129	0
Zbtb46	6.88443e-133	0.677471	0.578	0.104	8.67989e-129	0
Ybx3	8.10168e-133	0.703781	0.476	0.059	1.02146e-128	0
Nid1	1.07123e-132	0.816477	0.463	0.055	1.35061e-128	0
Tcf15	1.20274e-132	0.970014	0.343	0.011	1.51641e-128	0
Sri	1.63299e-132	0.606732	0.575	0.099	2.05888e-128	0
Lamc1	2.1542e-132	0.746114	0.524	0.081	2.71602e-128	0
Chmp4b	2.26168e-132	0.615603	0.494	0.066	2.85153e-128	0
Plaat3	2.40634e-132	0.787109	0.43	0.043	3.03392e-128	0
Cracr2b	3.21245e-132	0.759912	0.403	0.032	4.05026e-128	0
Ndufa11	3.3497e-132	0.581286	0.584	0.103	4.2233e-128	0
Rarg	4.22137e-132	0.727855	0.468	0.058	5.3223e-128	0
Eogt	6.15184e-132	0.731764	0.498	0.07	7.75624e-128	0
Ifi35	7.43935e-132	0.731622	0.501	0.071	9.37953e-128	0
Cox4i1	1.25438e-131	0.73449	0.939	0.304	1.58152e-127	0
Nxn	1.28493e-131	0.804927	0.617	0.123	1.62003e-127	0
Imp3	1.75943e-131	0.770067	0.423	0.041	2.21829e-127	0
Ssr2	1.94109e-131	0.677607	0.403	0.032	2.44732e-127	0
Pdia3	2.70932e-131	0.577709	0.674	0.144	3.41591e-127	0
Trappc4	3.37452e-131	0.607618	0.419	0.038	4.2546e-127	0
Kdelr2	3.74633e-131	0.712134	0.443	0.048	4.72338e-127	0
Ggta1	4.31678e-131	0.802138	0.411	0.036	5.4426e-127	0
Lgals3bp	5.13061e-131	0.760135	0.451	0.052	6.46868e-127	0
Gas5	5.20646e-131	0.630407	0.639	0.133	6.5643e-127	0
Lamtor5	7.57313e-131	0.644284	0.45	0.051	9.5482e-127	0
Tmem109	9.12204e-131	0.713381	0.406	0.034	1.15011e-126	0
Cdk17	1.48445e-130	0.716585	0.539	0.088	1.87159e-126	0
Srsf3	1.73768e-130	0.564293	0.713	0.166	2.19086e-126	0
Tm9sf2	1.77113e-130	0.616744	0.55	0.092	2.23304e-126	0
Ndfip1	4.22913e-130	0.558724	0.712	0.166	5.33209e-126	0
Ptms	4.65756e-130	0.648655	0.801	0.213	5.87225e-126	0
Mrpl20	5.47407e-130	0.556128	0.458	0.054	6.9017e-126	0
Tm2d2	7.56827e-130	0.653432	0.418	0.039	9.54208e-126	0
Dusp7	7.7002e-130	0.836199	0.358	0.018	9.70842e-126	0
Limch1	1.19894e-129	0.870076	0.865	0.279	1.51162e-125	0
Capns1	2.02069e-129	0.578871	0.676	0.151	2.54769e-125	0
Mrps24	2.09576e-129	0.601828	0.497	0.07	2.64234e-125	0
Ndufc1	2.39257e-129	0.603737	0.582	0.108	3.01655e-125	0
Trappc6b	2.63477e-129	0.554171	0.457	0.054	3.32192e-125	0
Mrpl17	2.93371e-129	0.712132	0.41	0.037	3.69882e-125	0
Smim10l1	4.10018e-129	0.664115	0.455	0.054	5.16951e-125	0
Hprt	4.19052e-129	0.660737	0.461	0.057	5.28341e-125	0
Bag5	4.91152e-129	0.755541	0.383	0.028	6.19245e-125	0
Zfhx3	6.8191e-129	0.817042	0.735	0.194	8.59752e-125	0
Rraga	7.30782e-129	0.743159	0.365	0.021	9.21371e-125	0
Atp1b3	1.0095e-128	0.791542	0.543	0.093	1.27278e-124	0
Mpzl1	1.06816e-128	0.732295	0.538	0.089	1.34673e-124	0
Rbms2	1.29113e-128	0.742941	0.723	0.186	1.62786e-124	0
Gas6	1.48962e-128	0.803259	0.772	0.215	1.87811e-124	0
Nbdy	5.23353e-128	0.690568	0.426	0.043	6.59844e-124	0
Psmc6	6.04927e-128	0.653537	0.487	0.068	7.62692e-124	0
Ndufb10	7.4575e-128	0.50289	0.561	0.097	9.40242e-124	0
Cltb	8.14213e-128	0.63678	0.49	0.07	1.02656e-123	0
Ifit2	9.67021e-128	1.06245	0.364	0.022	1.21922e-123	0
Endod1	1.20596e-127	0.706735	0.42	0.043	1.52047e-123	0
Eloc	1.52752e-127	0.585659	0.475	0.063	1.92589e-123	0
Hspa5	3.23761e-127	0.558074	0.652	0.142	4.08197e-123	0
Mrps33	3.90259e-127	0.622331	0.464	0.059	4.92038e-123	0
Eef1d	4.35031e-127	0.519367	0.613	0.122	5.48487e-123	0
Asap1	5.1628e-127	0.664981	0.872	0.262	6.50926e-123	0
Swap70	5.35759e-127	0.709434	0.468	0.062	6.75485e-123	0
Plac8	6.46329e-127	0.901551	0.407	0.039	8.14891e-123	0
Coa3	8.3446e-127	0.607408	0.467	0.06	1.05209e-122	0
Rtl8a	9.20646e-127	0.866474	0.426	0.046	1.16075e-122	0
Lpcat1	1.6714e-126	0.757724	0.422	0.044	2.1073e-122	0
Acap2	1.74689e-126	0.56861	0.579	0.109	2.20248e-122	0
Gna11	1.75845e-126	0.535145	0.63	0.13	2.21705e-122	0
Sipa1l2	1.76488e-126	0.727065	0.481	0.068	2.22516e-122	0
Rell1	1.96026e-126	0.777933	0.461	0.06	2.4715e-122	0
Cacybp	2.22372e-126	0.702195	0.399	0.035	2.80366e-122	0
Fkbp3	3.90217e-126	0.652347	0.447	0.054	4.91986e-122	0
Gimap8	4.32996e-126	0.770072	0.41	0.04	5.45921e-122	0
Pop5	7.96739e-126	0.580455	0.465	0.06	1.00453e-121	0
Dnajc8	8.80242e-126	0.620477	0.506	0.078	1.10981e-121	0
Naa20	9.91848e-126	0.523607	0.545	0.093	1.25052e-121	0
Fez2	1.18325e-125	0.675556	0.432	0.048	1.49184e-121	0
Tbrg1	1.21193e-125	0.609832	0.455	0.057	1.528e-121	0
9930111J21Rik2	1.2803e-125	0.769945	0.407	0.039	1.6142e-121	0
Ifi47	1.3296e-125	0.812979	0.359	0.022	1.67636e-121	0
Crlf2	1.40519e-125	0.762098	0.355	0.021	1.77166e-121	0
Arpp19	1.52876e-125	0.436822	0.671	0.147	1.92745e-121	0
Atp5mpl	1.92699e-125	0.56495	0.519	0.082	2.42955e-121	0
Cops9	2.73696e-125	0.597235	0.473	0.063	3.45076e-121	0
Cebpg	5.80141e-125	0.685913	0.42	0.044	7.31441e-121	0
Exoc3l4	9.95719e-125	0.694295	0.401	0.037	1.2554e-120	0
Bub3	1.16938e-124	0.670588	0.413	0.042	1.47436e-120	0
0610010K14Rik	1.48191e-124	0.702916	0.4	0.037	1.8684e-120	0
Fermt2	1.4842e-124	0.609572	0.813	0.224	1.87127e-120	0
Ostc	1.62256e-124	0.685564	0.389	0.033	2.04573e-120	0
Lmcd1	1.74111e-124	0.768429	0.47	0.065	2.19519e-120	0
Polr2g	2.10879e-124	0.708676	0.374	0.027	2.65876e-120	0
Gm20559	2.21958e-124	0.78068	0.372	0.027	2.79845e-120	0
Tsen34	2.40722e-124	0.677714	0.402	0.038	3.03502e-120	0
Uqcc3	3.23975e-124	0.665634	0.387	0.032	4.08468e-120	0
Klhl6	4.47671e-124	0.772092	0.384	0.032	5.64423e-120	0
Chst2	4.62022e-124	0.976151	0.359	0.024	5.82517e-120	0
Sh3bgrl	6.06012e-124	0.672287	0.502	0.078	7.6406e-120	0
Cyth3	8.49896e-124	0.653144	0.535	0.092	1.07155e-119	0
Nucb1	1.05486e-123	0.648523	0.495	0.076	1.32996e-119	0
Sipa1	1.0877e-123	0.727176	0.454	0.059	1.37137e-119	0
Tbcb	1.23021e-123	0.565036	0.456	0.059	1.55104e-119	0
Ifit1	1.23384e-123	1.25799	0.351	0.021	1.55563e-119	0
Anp32b	1.33884e-123	0.561443	0.47	0.065	1.68801e-119	0
Npdc1	1.42902e-123	0.638022	0.436	0.051	1.8017e-119	0
Tnfaip1	1.48219e-123	0.677162	0.481	0.072	1.86875e-119	0
Scand1	1.75719e-123	0.535248	0.597	0.121	2.21546e-119	0
2410006H16Rik	1.81394e-123	0.705785	0.412	0.042	2.28701e-119	0
Naa38	2.45033e-123	0.70706	0.413	0.043	3.08938e-119	0
Ahr	2.89618e-123	0.752071	0.359	0.024	3.65151e-119	0
Elf2	3.11487e-123	0.636708	0.546	0.098	3.92723e-119	0
Nfe2l1	3.65923e-123	0.644818	0.49	0.075	4.61356e-119	0
Serpinb6a	4.1363e-123	0.572326	0.523	0.087	5.21505e-119	0
Plgrkt	4.70888e-123	0.635233	0.449	0.057	5.93695e-119	0
Lamb2	6.98279e-123	0.600121	0.5	0.077	8.80391e-119	0
Sema3f	7.42914e-123	0.724059	0.434	0.052	9.36666e-119	0
Rab5c	1.73542e-122	0.565442	0.52	0.087	2.18802e-118	0
Ubc	2.32508e-122	0.740968	0.9	0.299	2.93147e-118	0
Nucks1	3.20371e-122	0.565209	0.58	0.114	4.03924e-118	0
Tmem258	5.57679e-122	0.681747	0.398	0.039	7.03121e-118	0
G3bp2	5.96259e-122	0.565569	0.471	0.066	7.51763e-118	0
Emp3	6.27446e-122	0.682734	0.442	0.055	7.91084e-118	0
Irgm1	1.02787e-121	0.812347	0.362	0.026	1.29594e-117	0
Tnfsf12	1.21505e-121	0.679471	0.396	0.038	1.53194e-117	0
Higd1a	1.40026e-121	0.632826	0.397	0.037	1.76545e-117	0
H2-M3	1.8888e-121	0.73324	0.336	0.017	2.3814e-117	0
Eif3e	1.9461e-121	0.544645	0.471	0.067	2.45364e-117	0
Atp5e	2.46487e-121	0.53586	0.852	0.246	3.10771e-117	0
Mier1	3.85636e-121	0.576626	0.563	0.106	4.8621e-117	0
Alyref	5.6364e-121	0.63186	0.355	0.024	7.10637e-117	0
Gjc1	6.34084e-121	0.74605	0.374	0.031	7.99453e-117	0
Srp19	6.61112e-121	0.678065	0.393	0.037	8.3353e-117	0
Ndufa3	8.00594e-121	0.477327	0.584	0.115	1.00939e-116	0
Gstp1	1.7448e-120	0.621071	0.391	0.037	2.19985e-116	0
Fxyd5	2.27709e-120	0.634577	0.554	0.105	2.87096e-116	0
Pebp1	2.89906e-120	0.508076	0.551	0.102	3.65514e-116	0
Psma6	3.42486e-120	0.572222	0.48	0.072	4.31806e-116	0
Ggh	3.76468e-120	0.698937	0.377	0.033	4.7465e-116	0
Cycs	4.31169e-120	0.541284	0.493	0.078	5.43617e-116	0
Mob4	4.34325e-120	0.55658	0.565	0.108	5.47597e-116	0
Purb	4.5579e-120	0.556671	0.592	0.12	5.7466e-116	0
Mdh2	5.05742e-120	0.490593	0.539	0.095	6.3764e-116	0
Sec62	5.84807e-120	0.564781	0.805	0.232	7.37324e-116	0
Card19	6.98117e-120	0.645688	0.369	0.029	8.80186e-116	0
Banf1	7.2571e-120	0.675669	0.379	0.033	9.14976e-116	0
Alkbh5	8.45457e-120	0.695137	0.424	0.05	1.06595e-115	0
Nrp2	1.04865e-119	0.796888	0.54	0.101	1.32214e-115	0
Pcmtd1	1.09318e-119	0.563226	0.558	0.107	1.37828e-115	0
Psma1	1.41476e-119	0.532059	0.521	0.089	1.78373e-115	0
Rpl28	1.9884e-119	0.798539	0.989	0.486	2.50697e-115	0
Ndufb7	2.20871e-119	0.439967	0.68	0.157	2.78475e-115	0
Tspan18	2.64171e-119	0.663877	0.5	0.082	3.33066e-115	0
Rpn1	3.43495e-119	0.596713	0.438	0.057	4.33079e-115	0
Mdfic	3.66842e-119	0.638303	0.501	0.082	4.62514e-115	0
Hsp90b1	3.84955e-119	0.620202	0.812	0.237	4.85351e-115	0
Herc6	4.24004e-119	0.857808	0.407	0.046	5.34584e-115	0
Psmd8	9.09481e-119	0.524775	0.466	0.068	1.14667e-114	0
Dok4	9.58966e-119	0.743457	0.348	0.022	1.20906e-114	0
Rtp3	1.06549e-118	0.771047	0.326	0.016	1.34337e-114	0
Zfp36l2	1.16392e-118	0.705348	0.357	0.027	1.46747e-114	0
Kras	1.18258e-118	0.576902	0.507	0.085	1.49099e-114	0
Pdcl3	2.14122e-118	0.640733	0.394	0.04	2.69966e-114	0
Ptpn12	3.13187e-118	0.606956	0.545	0.103	3.94866e-114	0
Sptbn1	3.32489e-118	0.857742	0.99	0.46	4.19202e-114	0
Atraid	4.27002e-118	0.498979	0.547	0.102	5.38364e-114	0
AU020206	6.47279e-118	0.785606	0.459	0.067	8.1609e-114	0
Vapa	7.50221e-118	0.512841	0.545	0.101	9.45878e-114	0
0610012G03Rik	1.04167e-117	0.522389	0.445	0.059	1.31334e-113	0
Eif5	1.13668e-117	0.541697	0.591	0.124	1.43312e-113	0
Dab2ip	1.24788e-117	0.512991	0.537	0.099	1.57333e-113	0
Plscr4	1.30707e-117	0.745768	0.624	0.148	1.64795e-113	0
Dusp1	1.43457e-117	0.714765	0.453	0.065	1.80871e-113	0
Gpx4	1.67063e-117	0.590939	0.901	0.29	2.10634e-113	0
Nfic	3.2078e-117	0.638646	0.564	0.112	4.04439e-113	0
Jcad	4.17421e-117	0.619086	0.412	0.047	5.26285e-113	0
Helz2	4.44701e-117	0.680275	0.35	0.025	5.60679e-113	0
Arl6ip5	5.2597e-117	0.563815	0.482	0.077	6.63143e-113	0
Rab6a	6.01453e-117	0.54497	0.473	0.072	7.58311e-113	0
Pdap1	6.61938e-117	0.659327	0.435	0.057	8.34571e-113	0
Cavin2	8.03818e-117	0.635566	0.51	0.09	1.01345e-112	0
Cct2	9.02556e-117	0.583784	0.431	0.055	1.13794e-112	0
Pdgfd	9.41947e-117	0.787886	0.633	0.153	1.18761e-112	0
Psmc2	9.89383e-117	0.577538	0.435	0.057	1.24741e-112	0
Rab2a	1.06251e-116	0.470358	0.802	0.225	1.33962e-112	0
Cope	1.36928e-116	0.553398	0.463	0.068	1.72639e-112	0
Pfdn2	1.72462e-116	0.556597	0.421	0.051	2.1744e-112	0
Ier2	2.15073e-116	0.755645	0.36	0.029	2.71164e-112	0
Csrp1	2.4618e-116	0.572981	0.486	0.078	3.10384e-112	0
Parvb	5.30858e-116	0.697719	0.397	0.044	6.69305e-112	0
Ccny	5.68093e-116	0.472446	0.615	0.136	7.16251e-112	0
Klf9	6.34639e-116	0.590176	0.626	0.145	8.00153e-112	0
Polr2k	6.72337e-116	0.548769	0.412	0.048	8.47682e-112	0
Gimap9	8.59257e-116	0.679741	0.363	0.031	1.08335e-111	0
Klhl24	8.82227e-116	0.552143	0.53	0.099	1.11231e-111	0
Lman1	1.20569e-115	0.574054	0.491	0.081	1.52014e-111	0
Anapc11	1.45652e-115	0.600399	0.404	0.047	1.83638e-111	0
Ephx1	2.64549e-115	0.646881	0.399	0.044	3.33543e-111	0
Eef2	3.49525e-115	0.503211	0.851	0.257	4.40681e-111	0
Adam15	4.59239e-115	0.564929	0.51	0.089	5.79009e-111	0
Znrd1	7.46367e-115	0.561176	0.384	0.039	9.4102e-111	0
Metap2	1.47377e-114	0.453328	0.545	0.105	1.85813e-110	0
Snrpd1	1.90455e-114	0.550179	0.391	0.042	2.40126e-110	0
Ctbp1	2.67382e-114	0.583221	0.461	0.07	3.37116e-110	0
Piezo2	4.27136e-114	0.896239	0.475	0.08	5.38533e-110	0
Rassf1	5.04191e-114	0.56302	0.427	0.057	6.35684e-110	0
Svbp	5.27689e-114	0.588046	0.374	0.035	6.6531e-110	0
Pcbp2	5.40341e-114	0.495223	0.694	0.176	6.81262e-110	0
Ppm1e	5.8459e-114	0.811418	0.391	0.043	7.37051e-110	0
Slc44a2	6.21938e-114	0.604245	0.476	0.077	7.84139e-110	0
Mmp15	1.204e-113	0.706446	0.323	0.018	1.51801e-109	0
Tlnrd1	2.07559e-113	0.681814	0.326	0.02	2.6169e-109	0
Cuta	2.25496e-113	0.507091	0.49	0.082	2.84306e-109	0
Ndufa2	3.61011e-113	0.392019	0.697	0.173	4.55163e-109	0
Bsg	6.87565e-113	0.415083	0.801	0.228	8.66882e-109	0
Polr2i	1.05316e-112	0.562726	0.384	0.04	1.32782e-108	0
Cbx1	1.40975e-112	0.532954	0.465	0.073	1.77741e-108	0
Pola2	1.47301e-112	0.726561	0.354	0.03	1.85716e-108	0
Polr2c	1.71267e-112	0.624049	0.373	0.037	2.15933e-108	0
Smad7	1.94679e-112	0.711872	0.578	0.127	2.45451e-108	0
Cdk4	2.07339e-112	0.61577	0.368	0.035	2.61413e-108	0
Ripor1	2.08405e-112	0.51483	0.451	0.067	2.62757e-108	0
Rbm42	3.24391e-112	0.591692	0.424	0.057	4.08992e-108	0
Cd164	3.86591e-112	0.636216	0.424	0.058	4.87413e-108	0
Smad1	4.78074e-112	0.715395	0.426	0.059	6.02755e-108	0
Gbp4	4.91596e-112	0.842807	0.354	0.031	6.19804e-108	0
Cdc42ep3	5.74811e-112	0.65034	0.386	0.042	7.24722e-108	0
Nudc	5.96224e-112	0.576285	0.441	0.064	7.51719e-108	0
Ndfip2	8.17696e-112	0.488066	0.493	0.085	1.03095e-107	0
Atpif1	8.97417e-112	0.359889	0.619	0.139	1.13146e-107	0
Eif6	9.09172e-112	0.515793	0.432	0.06	1.14628e-107	0
Arhgdia	9.31049e-112	0.443028	0.737	0.196	1.17387e-107	0
Filip1l	1.26668e-111	0.701668	0.456	0.073	1.59704e-107	0
Srpr	1.37363e-111	0.582452	0.442	0.066	1.73187e-107	0
Grpel1	1.43399e-111	0.620473	0.358	0.032	1.80797e-107	0
Syne1	1.47452e-111	0.691188	0.809	0.248	1.85908e-107	0
Tmbim4	2.15354e-111	0.457626	0.524	0.099	2.71519e-107	0
Hcfc1r1	3.05185e-111	0.621304	0.409	0.052	3.84777e-107	0
Asah1	3.7911e-111	0.502175	0.465	0.074	4.77982e-107	0
Mrps21	6.39427e-111	0.419823	0.524	0.098	8.06189e-107	0
Boc	7.01737e-111	0.71032	0.366	0.036	8.8475e-107	0
Gemin7	8.30733e-111	0.479766	0.428	0.059	1.04739e-106	0
Sf3b5	9.5972e-111	0.656117	0.358	0.033	1.21001e-106	0
Hdac7	1.00888e-110	0.577094	0.552	0.114	1.27199e-106	0
Rgs3	1.81724e-110	0.653398	0.482	0.084	2.29117e-106	0
1110004F10Rik	2.20145e-110	0.620475	0.411	0.054	2.77559e-106	0
Arpc1a	2.547e-110	0.475556	0.49	0.085	3.21126e-106	0
Hpcal1	3.09179e-110	0.422431	0.621	0.143	3.89813e-106	0
Mtpn	3.57733e-110	0.4962	0.423	0.058	4.5103e-106	0
Itprip	3.59244e-110	0.669377	0.337	0.025	4.52935e-106	0
Golga7	3.8004e-110	0.572472	0.382	0.042	4.79154e-106	0
Gbp9	3.98868e-110	0.788916	0.331	0.024	5.02893e-106	0
Plk2	4.23358e-110	0.928279	0.35	0.032	5.3377e-106	0
Nono	6.32806e-110	0.553589	0.421	0.057	7.97842e-106	0
Ppp1r13b	8.20193e-110	0.4914	0.526	0.101	1.0341e-105	0
N4bp3	9.12119e-110	0.723623	0.333	0.024	1.15e-105	0
Pitpna	9.79125e-110	0.553984	0.623	0.148	1.23448e-105	0
Epn2	1.19888e-109	0.482811	0.549	0.114	1.51155e-105	0
Abcg1	1.28746e-109	0.709677	0.327	0.022	1.62323e-105	0
Mlf2	1.54473e-109	0.539392	0.442	0.066	1.94759e-105	0
Eny2	2.79742e-109	0.555876	0.431	0.062	3.52698e-105	0
Ghitm	2.80373e-109	0.525251	0.428	0.061	3.53494e-105	0
Sox7	3.30865e-109	0.759284	0.287	0.01	4.17155e-105	0
Gtf2a2	4.203e-109	0.503252	0.403	0.05	5.29914e-105	0
Pdcd6	4.91045e-109	0.558887	0.401	0.05	6.19109e-105	0
Prkd2	5.9503e-109	0.665467	0.367	0.038	7.50214e-105	0
Edil3	6.03432e-109	0.974543	0.345	0.032	7.60807e-105	0
Hecw2	7.4783e-109	0.552673	0.549	0.114	9.42864e-105	0
Snrpc	7.65744e-109	0.567808	0.351	0.032	9.6545e-105	0
Rnf213	9.78499e-109	0.590459	0.529	0.107	1.23369e-104	0
Psmc5	1.0891e-108	0.438626	0.472	0.079	1.37314e-104	0
Filip1	1.16609e-108	0.787902	0.386	0.047	1.47021e-104	0
Atp5c1	1.21606e-108	0.320825	0.673	0.166	1.53321e-104	0
Dip2b	1.22261e-108	0.456708	0.596	0.134	1.54146e-104	0
Ramac	1.46443e-108	0.608706	0.325	0.022	1.84636e-104	0
Btg2	1.95843e-108	0.762883	0.338	0.028	2.46919e-104	0
Cnn3	1.99503e-108	0.53766	0.621	0.149	2.51533e-104	0
Ddrgk1	2.16121e-108	0.457685	0.49	0.087	2.72485e-104	0
Adipor1	2.21854e-108	0.507665	0.445	0.069	2.79713e-104	0
Cmtm3	3.23851e-108	0.67389	0.331	0.025	4.08312e-104	0
Cd274	4.75226e-108	0.800364	0.3	0.014	5.99165e-104	0
Rap1a	5.18773e-108	0.452049	0.587	0.13	6.54069e-104	0
Mfng	5.67354e-108	0.705333	0.328	0.024	7.1532e-104	0
Cr1l	8.92049e-108	0.560426	0.46	0.076	1.12469e-103	0
Rab8b	1.0369e-107	0.684298	0.367	0.039	1.30732e-103	0
Fam3c	1.69117e-107	0.50289	0.41	0.055	2.13222e-103	0
Irf9	1.70199e-107	0.603602	0.35	0.033	2.14587e-103	0
Ssu72	2.40632e-107	0.496814	0.488	0.087	3.03388e-103	0
Hnrnpa1	2.57732e-107	0.483936	0.483	0.086	3.24949e-103	0
Raly	4.46147e-107	0.381534	0.656	0.164	5.62502e-103	0
Mrpl27	4.49593e-107	0.61522	0.346	0.032	5.66847e-103	0
Strap	4.52894e-107	0.584878	0.333	0.026	5.71009e-103	0
Rnaseh2c	6.04022e-107	0.618911	0.354	0.034	7.6155e-103	0
Sncg	1.18628e-106	0.637768	0.432	0.066	1.49566e-102	0
Cstb	1.29275e-106	0.5871	0.336	0.028	1.6299e-102	0
Grap	1.32672e-106	0.674413	0.354	0.036	1.67273e-102	0
Tmx3	1.9546e-106	0.557852	0.422	0.062	2.46436e-102	0
Rcsd1	1.99538e-106	0.679892	0.466	0.081	2.51578e-102	0
Stx2	2.39169e-106	0.670545	0.383	0.046	3.01544e-102	0
Stox2	2.72822e-106	0.778585	0.711	0.21	3.43974e-102	0
Cfl2	2.83917e-106	0.587481	0.376	0.043	3.57962e-102	0
1110038F14Rik	3.01662e-106	0.512384	0.379	0.044	3.80335e-102	0
Rnf11	4.03957e-106	0.480756	0.455	0.075	5.09309e-102	0
Pkm	4.07023e-106	0.445955	0.568	0.124	5.13174e-102	0
Uqcr11	4.33122e-106	0.38238	0.757	0.213	5.46081e-102	0
Hist3h2a	4.82809e-106	0.669624	0.32	0.023	6.08725e-102	0
Mat2b	5.37633e-106	0.52024	0.388	0.048	6.77848e-102	0
Ctnnd1	9.97326e-106	0.45599	0.648	0.163	1.25743e-101	0
Znfx1	1.3623e-105	0.557276	0.431	0.066	1.71759e-101	0
Ndufb5	1.38711e-105	0.393729	0.518	0.101	1.74886e-101	0
Grn	1.51503e-105	0.410304	0.558	0.121	1.91014e-101	0
Afap1l1	1.87569e-105	0.40496	0.503	0.095	2.36487e-101	0
Smc1a	2.03654e-105	0.49889	0.514	0.101	2.56766e-101	0
Psma4	2.28732e-105	0.43859	0.509	0.099	2.88386e-101	0
Tmbim6	3.7283e-105	0.488939	0.834	0.258	4.70064e-101	0
Ralbp1	4.36665e-105	0.543999	0.513	0.103	5.50548e-101	0
Spred1	4.61895e-105	0.624721	0.442	0.072	5.82357e-101	0
Tmem208	4.80816e-105	0.503728	0.429	0.066	6.06212e-101	0
Unc45b	5.11827e-105	0.5807	0.37	0.042	6.45311e-101	0
Taf10	5.89181e-105	0.368856	0.483	0.088	7.42839e-101	0
Cct5	8.28702e-105	0.487991	0.419	0.061	1.04483e-100	0
Gja1	8.98418e-105	0.913878	0.293	0.014	1.13273e-100	0
Mesd	1.00312e-104	0.550327	0.393	0.052	1.26473e-100	0
Vasp	1.09552e-104	0.547872	0.389	0.05	1.38123e-100	0
Yes1	1.17353e-104	0.616263	0.478	0.087	1.47959e-100	0
Eif3g	1.32578e-104	0.484544	0.418	0.061	1.67154e-100	0
Atp6ap2	1.70163e-104	0.512855	0.392	0.051	2.14542e-100	0
Cyba	1.79963e-104	0.403636	0.677	0.175	2.26897e-100	0
Fis1	1.84518e-104	0.361725	0.62	0.148	2.32641e-100	0
Atp5g3	2.39923e-104	0.385045	0.539	0.114	3.02496e-100	0
Mtmr2	2.44893e-104	0.60082	0.41	0.059	3.08761e-100	0
Dipk2b	2.79136e-104	0.861021	0.275	0.009	3.51934e-100	0
Ndufb6	3.21497e-104	0.520539	0.381	0.047	4.05344e-100	0
Nedd9	4.01514e-104	0.579283	0.601	0.146	5.06228e-100	0
Cox14	4.10589e-104	0.57182	0.363	0.04	5.17671e-100	0
Tmtc2	5.07692e-104	0.943251	0.44	0.076	6.40099e-100	0
Ufc1	5.4214e-104	0.451013	0.404	0.055	6.83531e-100	0
Rflna	6.09629e-104	0.751612	0.306	0.02	7.6862e-100	0
Ndufs8	6.8061e-104	0.496424	0.43	0.066	8.58113e-100	0
Arl6ip1	8.45768e-104	0.383552	0.708	0.194	1.06634e-99	0
Tex261	1.0251e-103	0.511724	0.379	0.046	1.29244e-99	0
Emc2	1.2879e-103	0.610346	0.37	0.043	1.62378e-99	0
Ddost	1.328e-103	0.51742	0.364	0.042	1.67434e-99	0
Mob1a	1.73729e-103	0.522693	0.361	0.04	2.19037e-99	0
Tomm5	1.88369e-103	0.517377	0.374	0.044	2.37495e-99	0
Tusc3	2.21295e-103	0.55959	0.419	0.064	2.79009e-99	0
Hfe	2.33572e-103	0.622968	0.32	0.025	2.94488e-99	0
Nfe2l2	2.88011e-103	0.412859	0.599	0.144	3.63125e-99	0
Ndufab1	4.94042e-103	0.482051	0.444	0.074	6.22888e-99	0
Pitpnm2	6.14947e-103	0.516183	0.439	0.072	7.75325e-99	0
Rexo2	7.05927e-103	0.447719	0.436	0.07	8.90033e-99	0
Nin	1.0408e-102	0.64045	0.368	0.044	1.31224e-98	0
Rnf130	1.17803e-102	0.377568	0.554	0.12	1.48526e-98	0
Wdr83os	1.40471e-102	0.52745	0.342	0.033	1.77105e-98	0
Ube2d3	1.41639e-102	0.417933	0.641	0.162	1.78578e-98	0
Tgoln1	1.5145e-102	0.486553	0.532	0.114	1.90948e-98	0
Leprotl1	1.56506e-102	0.591608	0.319	0.025	1.97323e-98	0
Lrrc32	1.72681e-102	0.694873	0.34	0.033	2.17716e-98	0
Cnpy2	1.7295e-102	0.504999	0.408	0.059	2.18055e-98	0
Cct6a	2.51448e-102	0.483926	0.411	0.06	3.17026e-98	0
Trafd1	2.7279e-102	0.63203	0.335	0.032	3.43933e-98	0
Gm12216	3.35224e-102	0.683495	0.371	0.046	4.2265e-98	0
Cast	3.59051e-102	0.375476	0.528	0.11	4.52692e-98	0
Tsc22d3	3.67658e-102	0.548801	0.423	0.066	4.63543e-98	0
Sh2b3	4.31294e-102	0.675483	0.354	0.039	5.43775e-98	0
Stard9	4.60569e-102	0.670443	0.424	0.068	5.80686e-98	0
Cd36	4.93648e-102	1.33013	0.517	0.128	6.22391e-98	0
Scarb2	5.06455e-102	0.605067	0.4	0.057	6.38539e-98	0
Csnk1a1	5.59722e-102	0.426903	0.796	0.239	7.05697e-98	0
Cmtm6	5.87752e-102	0.550625	0.362	0.042	7.41037e-98	0
Tmed7	6.10327e-102	0.547883	0.373	0.046	7.695e-98	0
Ddx58	6.80621e-102	0.679531	0.341	0.034	8.58127e-98	0
Rock1	7.12877e-102	0.470386	0.74	0.217	8.98795e-98	0
Pik3r3	9.22634e-102	0.653024	0.473	0.091	1.16326e-97	0
Gm4951	1.28454e-101	0.933876	0.335	0.033	1.61955e-97	0
Mapk12	2.94405e-101	0.504634	0.404	0.059	3.71186e-97	0
St13	3.09416e-101	0.450981	0.595	0.142	3.90112e-97	0
Tle5	4.71369e-101	0.316127	0.699	0.189	5.94301e-97	0
Nuak1	4.80593e-101	0.776558	0.423	0.07	6.05932e-97	0
Pak1ip1	5.02812e-101	0.461797	0.408	0.061	6.33945e-97	0
Rpl10a	5.9462e-101	0.525954	0.891	0.306	7.49698e-97	0
Fam110a	9.76992e-101	0.675602	0.34	0.035	1.23179e-96	0
Arpc4	1.05629e-100	0.31039	0.581	0.134	1.33177e-96	0
Pros1	1.08484e-100	0.605197	0.373	0.047	1.36776e-96	0
Actn4	1.18781e-100	0.47289	0.809	0.254	1.49759e-96	0
Plekhg1	1.44206e-100	0.550392	0.58	0.142	1.81815e-96	0
Tril	1.44267e-100	0.764906	0.285	0.015	1.81892e-96	0
Psmc3	1.44393e-100	0.420384	0.51	0.104	1.8205e-96	0
Irf2	1.5532e-100	0.457571	0.622	0.158	1.95827e-96	0
Klf6	1.86713e-100	0.605675	0.364	0.043	2.35408e-96	0
Bcas2	2.67044e-100	0.518641	0.363	0.043	3.36688e-96	0
Zfp706	2.92565e-100	0.457142	0.47	0.087	3.68866e-96	0
Cript	3.24897e-100	0.502839	0.376	0.048	4.0963e-96	0
Ubl3	3.91585e-100	0.494185	0.482	0.093	4.9371e-96	0
Lamtor1	4.59093e-100	0.479238	0.444	0.077	5.78825e-96	0
Rab12	4.68149e-100	0.525578	0.441	0.075	5.90242e-96	0
Sox4	4.76899e-100	0.898156	0.355	0.043	6.01274e-96	0
D5Ertd615e	5.05867e-100	1.00659	0.404	0.065	6.37797e-96	0
Cds2	7.53351e-100	0.467327	0.502	0.103	9.49825e-96	0
Mrpl57	8.25533e-100	0.613676	0.307	0.023	1.04083e-95	0
Eif3m	1.09665e-99	0.414198	0.403	0.06	1.38265e-95	0
Tax1bp1	1.21523e-99	0.396239	0.578	0.136	1.53216e-95	0
Pcdh12	1.29193e-99	0.538955	0.353	0.04	1.62887e-95	0
Magoh	1.36227e-99	0.546285	0.332	0.032	1.71755e-95	0
Hspe1	1.50589e-99	0.472017	0.437	0.074	1.89863e-95	0
Ppp2ca	1.76334e-99	0.373715	0.479	0.091	2.22322e-95	0
Csnk2a1	1.90491e-99	0.362998	0.613	0.151	2.40171e-95	0
Pon2	2.09002e-99	0.546237	0.384	0.054	2.63509e-95	0
Sec14l1	2.1672e-99	0.526782	0.481	0.093	2.73241e-95	0
Dynlt3	2.21556e-99	0.594207	0.339	0.035	2.79338e-95	0
Ppic	2.35389e-99	0.509697	0.366	0.045	2.96778e-95	0
Ddx3x	2.38514e-99	0.3925	0.5	0.101	3.00719e-95	0
Csde1	2.38528e-99	0.398733	0.558	0.127	3.00736e-95	0
Iqgap1	2.73773e-99	0.502051	0.669	0.184	3.45174e-95	0
Cnot6l	2.77598e-99	0.507507	0.432	0.072	3.49995e-95	0
Lyn	2.88203e-99	0.511415	0.557	0.13	3.63367e-95	0
Tsn	3.45806e-99	0.426881	0.435	0.074	4.35993e-95	0
Map4	3.71207e-99	0.443617	0.627	0.163	4.68017e-95	0
Arf6	4.70127e-99	0.524833	0.364	0.044	5.92736e-95	0
Mydgf	8.38081e-99	0.497407	0.364	0.045	1.05665e-94	0
Ypel3	8.55509e-99	0.405194	0.477	0.091	1.07863e-94	0
Cyp2d22	1.04416e-98	0.612093	0.335	0.035	1.31648e-94	0
Psmd7	1.26977e-98	0.37967	0.573	0.134	1.60093e-94	0
Tcea1	1.62123e-98	0.380269	0.529	0.113	2.04405e-94	0
Vti1b	1.75478e-98	0.549382	0.387	0.054	2.21242e-94	0
Pcnp	1.797e-98	0.438378	0.469	0.089	2.26566e-94	0
Tln1	1.83845e-98	0.333586	0.655	0.171	2.31792e-94	0
Ube2l6	3.24485e-98	0.700945	0.285	0.017	4.09111e-94	0
Mcf2l	3.62657e-98	0.536197	0.421	0.069	4.57238e-94	0
Mbd2	3.69478e-98	0.337759	0.593	0.142	4.65838e-94	0
Sar1a	4.10129e-98	0.48862	0.382	0.052	5.17091e-94	0
Cbx3	4.45835e-98	0.513665	0.38	0.052	5.62109e-94	0
Ift20	6.25506e-98	0.475052	0.413	0.065	7.88638e-94	0
Parp12	6.73395e-98	0.57671	0.351	0.042	8.49016e-94	0
Ap2m1	7.22929e-98	0.408932	0.429	0.072	9.11469e-94	0
Stim2	7.52792e-98	0.442829	0.505	0.106	9.4912e-94	0
Fam104a	8.71864e-98	0.448935	0.372	0.048	1.09925e-93	0
Ndufb2	9.04673e-98	0.441163	0.452	0.082	1.14061e-93	0
Lamtor3	1.01625e-97	0.521065	0.327	0.032	1.28128e-93	0
Tmem223	1.20078e-97	0.594037	0.369	0.048	1.51394e-93	0
Emp1	1.47077e-97	0.650129	0.316	0.028	1.85435e-93	0
Ube2l3	1.5565e-97	0.405111	0.447	0.08	1.96244e-93	0
Sdhd	1.73397e-97	0.470233	0.317	0.028	2.1862e-93	0
Tap1	1.89697e-97	0.614634	0.31	0.026	2.39171e-93	0
Fam174a	2.12314e-97	0.597154	0.317	0.029	2.67685e-93	0
Stx12	2.3617e-97	0.352236	0.471	0.089	2.97764e-93	0
Slc29a1	2.46906e-97	0.602242	0.359	0.045	3.11299e-93	0
Sys1	2.60551e-97	0.477944	0.381	0.053	3.28503e-93	0
Emg1	2.80079e-97	0.428824	0.37	0.048	3.53123e-93	0
Phospho1	3.04197e-97	0.694071	0.255	0.007	3.83532e-93	0
Dctn6	3.16518e-97	0.526215	0.341	0.037	3.99065e-93	0
Rps27rt	3.29352e-97	0.600301	0.309	0.026	4.15247e-93	0
Adprh	3.82635e-97	0.60448	0.292	0.02	4.82426e-93	0
Scn1b	4.12071e-97	0.549356	0.327	0.032	5.19539e-93	0
Rab5if	5.32242e-97	0.56727	0.358	0.044	6.71051e-93	0
Chmp3	5.38852e-97	0.337958	0.509	0.107	6.79385e-93	0
Psmb7	6.74446e-97	0.438239	0.393	0.058	8.50342e-93	0
Tmpo	8.57249e-97	0.472075	0.422	0.072	1.08082e-92	0
Actr3	9.00182e-97	0.385955	0.501	0.104	1.13495e-92	0
Aplnr	1.00726e-96	0.83748	0.27	0.013	1.26996e-92	0
Plod1	1.03271e-96	0.51385	0.354	0.043	1.30204e-92	0
Adh5	1.12814e-96	0.469676	0.34	0.037	1.42235e-92	0
Inpp5d	1.31535e-96	0.559994	0.431	0.076	1.6584e-92	0
Vbp1	1.6187e-96	0.450592	0.344	0.039	2.04086e-92	0
Usp25	1.93506e-96	0.430481	0.541	0.123	2.43972e-92	0
Asap2	2.12384e-96	0.487606	0.552	0.13	2.67774e-92	0
Btg3	2.12822e-96	0.633981	0.29	0.02	2.68326e-92	0
4930523C07Rik	2.40353e-96	0.611619	0.405	0.066	3.03037e-92	0
Elovl5	3.16833e-96	0.559874	0.393	0.059	3.99463e-92	0
Zfp652	4.90091e-96	0.531345	0.386	0.057	6.17906e-92	0
Nr3c1	6.08081e-96	0.404109	0.679	0.19	7.66669e-92	0
Sod1	8.31569e-96	0.432265	0.646	0.176	1.04844e-91	0
2900097C17Rik	8.34487e-96	0.504937	0.366	0.049	1.05212e-91	0
Tmem128	1.14368e-95	0.490798	0.366	0.049	1.44195e-91	0
Dnaja2	1.9378e-95	0.339854	0.451	0.084	2.44318e-91	0
Irx5	2.21875e-95	0.695957	0.262	0.011	2.7974e-91	0
Triobp	2.63256e-95	0.49921	0.336	0.037	3.31913e-91	0
Commd3	2.74546e-95	0.489188	0.352	0.044	3.46148e-91	0
Ebp	3.27383e-95	0.555865	0.276	0.016	4.12764e-91	0
Ica1	3.46275e-95	0.552014	0.458	0.089	4.36583e-91	0
Morf4l2	3.58684e-95	0.44749	0.345	0.04	4.52228e-91	0
Cdc42se2	3.6954e-95	0.474743	0.403	0.065	4.65916e-91	0
Fcgrt	5.88264e-95	0.393453	0.455	0.087	7.41683e-91	0
Apobec3	6.34349e-95	0.643428	0.335	0.038	7.99787e-91	0
Rab7	6.43776e-95	0.335922	0.621	0.161	8.11673e-91	0
Dock6	6.63315e-95	0.398285	0.514	0.113	8.36308e-91	0
Mif	6.76337e-95	0.515728	0.423	0.074	8.52725e-91	0
Fgfr1op2	8.05829e-95	0.424144	0.403	0.063	1.01599e-90	0
Fam53b	9.07095e-95	0.464224	0.34	0.039	1.14367e-90	0
Polr2m	1.03092e-94	0.431984	0.376	0.054	1.29979e-90	0
Rcn2	1.06682e-94	0.552323	0.332	0.037	1.34505e-90	0
Mylip	1.56557e-94	0.544499	0.431	0.078	1.97388e-90	0
Polr2l	1.8208e-94	0.466947	0.358	0.047	2.29567e-90	0
Csnk2b	1.84993e-94	0.452144	0.388	0.059	2.33239e-90	0
P4hb	2.20157e-94	0.422403	0.482	0.099	2.77574e-90	0
Notch4	2.26318e-94	0.489742	0.354	0.046	2.85341e-90	0
Rnf215	2.49462e-94	0.561611	0.316	0.031	3.14521e-90	0
Rab1a	2.6157e-94	0.349234	0.528	0.119	3.29787e-90	0
Cyb5a	2.64418e-94	0.331656	0.785	0.245	3.33379e-90	0
Prkx	2.93266e-94	0.559651	0.308	0.028	3.69749e-90	0
Tm2d1	4.54196e-94	0.441002	0.339	0.039	5.7265e-90	0
Prmt1	4.8695e-94	0.39576	0.356	0.046	6.13947e-90	0
Vwa1	5.04265e-94	0.631723	0.293	0.022	6.35778e-90	0
Inpp5k	5.17588e-94	0.48007	0.385	0.058	6.52575e-90	0
Ces2e	5.62701e-94	0.613656	0.277	0.017	7.09453e-90	0
Gm16286	6.84728e-94	0.458292	0.36	0.048	8.63306e-90	0
Nos3	7.3032e-94	0.563643	0.307	0.028	9.20787e-90	0
Ccdc59	9.11192e-94	0.470816	0.372	0.052	1.14883e-89	0
Tmem26	1.02241e-93	0.60836	0.35	0.044	1.28905e-89	0
St3gal1	1.3857e-93	0.49667	0.448	0.087	1.74709e-89	0
Atp6ap1	1.51851e-93	0.478841	0.388	0.06	1.91454e-89	0
Dnajb11	1.94523e-93	0.520708	0.335	0.039	2.45254e-89	0
Hist1h2bc	1.97372e-93	0.63969	0.401	0.066	2.48847e-89	0
Phf5a	2.00503e-93	0.501774	0.32	0.033	2.52794e-89	0
Ctnna1	2.50956e-93	0.398164	0.775	0.243	3.16405e-89	0
Ech1	3.11159e-93	0.322241	0.516	0.115	3.9231e-89	0
Psmc4	3.45349e-93	0.342665	0.411	0.069	4.35416e-89	0
Irgm2	5.2297e-93	0.720849	0.275	0.017	6.5936e-89	0
Selenot	5.41231e-93	0.4289	0.418	0.073	6.82384e-89	0
Fat4	6.23413e-93	0.615965	0.29	0.022	7.85999e-89	0
Tapbpl	7.22753e-93	0.548199	0.28	0.019	9.11247e-89	0
Bcl7b	8.35409e-93	0.538754	0.312	0.031	1.05328e-88	0
Cald1	8.55932e-93	0.526396	0.869	0.314	1.07916e-88	0
Smap1	1.02162e-92	0.353388	0.505	0.111	1.28806e-88	0
Rpl13a	1.14633e-92	0.634854	0.98	0.438	1.44529e-88	0
1700030F04Rik	1.26847e-92	0.538245	0.27	0.016	1.59929e-88	0
Chrac1	1.58367e-92	0.578638	0.311	0.031	1.99668e-88	0
Fscn1	1.59368e-92	0.695929	0.304	0.028	2.00931e-88	0
Slirp	1.62509e-92	0.535508	0.328	0.037	2.04891e-88	0
Gpr146	1.91716e-92	0.563098	0.338	0.042	2.41716e-88	0
Stk10	1.97861e-92	0.515963	0.332	0.038	2.49463e-88	0
Micos13	1.99181e-92	0.412253	0.422	0.074	2.51128e-88	0
Aamp	2.07221e-92	0.42243	0.399	0.065	2.61264e-88	0
Selenoh	2.31195e-92	0.555609	0.292	0.024	2.91491e-88	0
Cdkn1a	2.40083e-92	0.707843	0.266	0.014	3.02696e-88	0
Nenf	2.9144e-92	0.424952	0.459	0.092	3.67447e-88	0
Zc3hav1	2.9257e-92	0.528464	0.374	0.055	3.68872e-88	0
Etnk1	3.01783e-92	0.36018	0.601	0.156	3.80488e-88	0
Med10	3.21333e-92	0.574413	0.283	0.021	4.05137e-88	0
Ddx50	6.49678e-92	0.370911	0.446	0.086	8.19114e-88	0
Rasal2	9.23643e-92	0.495628	0.721	0.227	1.16453e-87	0
C430049B03Rik	9.47721e-92	0.722148	0.294	0.025	1.19489e-87	0
Eif4a3	1.35576e-91	0.432218	0.368	0.053	1.70934e-87	0
Xbp1	1.41425e-91	0.500439	0.354	0.048	1.78308e-87	0
Hipk2	1.67765e-91	0.748112	0.84	0.337	2.11518e-87	0
Sp3	1.71187e-91	0.479713	0.382	0.059	2.15832e-87	0
Csnk1e	1.77857e-91	0.546909	0.365	0.053	2.24242e-87	0
Calm3	2.16443e-91	0.380816	0.393	0.063	2.72891e-87	0
Slc6a6	2.18564e-91	0.840091	0.816	0.337	2.75565e-87	0
Ubqln2	2.27459e-91	0.59976	0.257	0.013	2.8678e-87	0
Eif3j1	2.40941e-91	0.483192	0.391	0.065	3.03778e-87	0
Tor1aip1	2.45046e-91	0.358597	0.539	0.127	3.08954e-87	0
Mrpl43	2.59966e-91	0.459831	0.325	0.037	3.27766e-87	0
Ssr3	2.67205e-91	0.436101	0.37	0.054	3.36892e-87	0
Kdelr1	2.9249e-91	0.385377	0.391	0.063	3.68771e-87	0
Prex1	2.96751e-91	0.519072	0.333	0.04	3.74143e-87	0
Cltc	4.25496e-91	0.284427	0.611	0.16	5.36465e-87	0
Trmt112	4.36839e-91	0.463789	0.338	0.043	5.50767e-87	0
Ppp2r1a	4.92568e-91	0.437954	0.381	0.059	6.2103e-87	0
Slc44a1	5.92405e-91	0.443162	0.432	0.082	7.46904e-87	0
Aip	6.68875e-91	0.550878	0.319	0.035	8.43318e-87	0
Cdv3	9.49924e-91	0.517423	0.372	0.056	1.19766e-86	0
Emc4	1.06612e-90	0.531587	0.293	0.025	1.34417e-86	0
Mrpl52	1.90012e-90	0.504638	0.429	0.081	2.39567e-86	0
Rab21	2.66886e-90	0.273721	0.49	0.106	3.3649e-86	0
Dguok	2.67395e-90	0.366047	0.375	0.057	3.37132e-86	0
Col4a2	3.13636e-90	0.520508	0.803	0.283	3.95433e-86	0
Rbis	3.47388e-90	0.462786	0.346	0.046	4.37987e-86	0
Gbp3	5.09439e-90	0.671763	0.265	0.016	6.42301e-86	0
Mrps16	5.73037e-90	0.487321	0.324	0.037	7.22485e-86	0
Ptk2	5.83706e-90	0.406149	0.736	0.23	7.35937e-86	0
Hnrnph3	6.24767e-90	0.288885	0.473	0.099	7.87706e-86	0
Peg13	7.88254e-90	0.568898	0.283	0.022	9.9383e-86	0
Ifnar1	7.89474e-90	0.51767	0.439	0.087	9.95368e-86	0
Ap2s1	8.50772e-90	0.376601	0.431	0.081	1.07265e-85	0
St6galnac4	8.72454e-90	0.533488	0.271	0.018	1.09999e-85	0
Igf1	9.70775e-90	0.89789	0.364	0.057	1.22395e-85	0
Sdc3	1.02501e-89	0.544379	0.306	0.031	1.29233e-85	0
Samhd1	1.19547e-89	0.490037	0.408	0.073	1.50725e-85	0
Unc5b	1.46332e-89	0.655377	0.311	0.034	1.84495e-85	0
Lrrc58	1.54683e-89	0.335361	0.668	0.195	1.95025e-85	0
Npr1	1.56216e-89	0.387012	0.471	0.1	1.96957e-85	0
Timm8b	1.81151e-89	0.498277	0.321	0.037	2.28395e-85	0
Sap30l	2.12951e-89	0.497218	0.321	0.037	2.68488e-85	0
Erp29	2.57111e-89	0.332012	0.426	0.081	3.24166e-85	0
Arhgap27	2.69063e-89	0.515163	0.304	0.031	3.39235e-85	0
Gata2	3.02419e-89	0.539054	0.324	0.039	3.8129e-85	0
Nptn	3.47045e-89	0.364027	0.48	0.104	4.37554e-85	0
Ctdsp2	5.02932e-89	0.358172	0.453	0.093	6.34097e-85	0
Yif1b	7.63198e-89	0.497611	0.343	0.047	9.62241e-85	0
Mcam	1.31753e-88	0.678722	0.332	0.044	1.66114e-84	0
Carhsp1	1.39825e-88	0.512191	0.301	0.03	1.76292e-84	0
Mrpl53	1.42357e-88	0.424998	0.33	0.041	1.79483e-84	0
Atp2c1	1.46127e-88	0.41429	0.418	0.078	1.84237e-84	0
Nsa2	1.52649e-88	0.548698	0.306	0.032	1.9246e-84	0
Lrch1	2.50244e-88	0.353222	0.638	0.182	3.15507e-84	0
Yipf3	5.65371e-88	0.533464	0.306	0.033	7.12819e-84	0
Cyth2	6.27317e-88	0.472439	0.296	0.029	7.90921e-84	0
Pfdn1	6.84614e-88	0.319035	0.448	0.091	8.63161e-84	0
Samd9l	8.12625e-88	0.351674	0.49	0.11	1.02456e-83	0
Actr10	9.44743e-88	0.359358	0.409	0.073	1.19113e-83	0
Ndufs6	9.73929e-88	0.312086	0.5	0.113	1.22793e-83	0
Esd	1.01053e-87	0.33005	0.453	0.093	1.27408e-83	0
Phb2	1.22969e-87	0.466445	0.354	0.051	1.55039e-83	0
Ifit3b	1.28965e-87	0.708637	0.256	0.015	1.62599e-83	0
Rab1b	1.44845e-87	0.396949	0.329	0.042	1.82621e-83	0
Igtp	1.75089e-87	0.651379	0.273	0.021	2.20753e-83	0
Klf10	1.81881e-87	0.610438	0.283	0.025	2.29316e-83	0
Mbnl1	1.98126e-87	0.363651	0.748	0.238	2.49797e-83	0
Mcrip1	2.05681e-87	0.346388	0.403	0.072	2.59323e-83	0
2900026A02Rik	2.05767e-87	0.341135	0.48	0.106	2.59432e-83	0
Anxa7	2.26406e-87	0.422807	0.378	0.062	2.85452e-83	0
Smim12	2.40259e-87	0.437987	0.293	0.028	3.02919e-83	0
Eif2s2	2.49111e-87	0.38151	0.598	0.163	3.14079e-83	0
Pmepa1	2.631e-87	0.534404	0.465	0.101	3.31717e-83	0
Zfpm1	2.99966e-87	0.470923	0.298	0.03	3.78197e-83	0
Hist1h4d	4.09913e-87	0.585046	0.25	0.013	5.16818e-83	0
Yy1	5.52398e-87	0.285045	0.502	0.115	6.96463e-83	0
Washc3	5.5461e-87	0.53759	0.293	0.028	6.99252e-83	0
Sncaip	6.15967e-87	0.566477	0.374	0.062	7.76612e-83	0
Rilpl1	7.04768e-87	0.494714	0.322	0.039	8.88571e-83	0
Nt5c	7.14539e-87	0.49821	0.304	0.033	9.00891e-83	0
Pgam1	7.3593e-87	0.392117	0.401	0.072	9.27861e-83	0
Ube2e3	8.23807e-87	0.342968	0.374	0.06	1.03866e-82	0
Mrpl36	8.97241e-87	0.482071	0.293	0.029	1.13124e-82	0
Trim12a	1.02022e-86	0.510472	0.336	0.046	1.28629e-82	0
Rbms1	1.18512e-86	0.705147	0.936	0.427	1.4942e-82	0
Mrpl58	1.26254e-86	0.35765	0.364	0.056	1.59181e-82	0
H2-Ab1	1.35214e-86	0.587175	0.465	0.107	1.70477e-82	0
Vps36	1.6796e-86	0.45209	0.366	0.058	2.11763e-82	0
Rex1bd	2.20409e-86	0.374484	0.414	0.078	2.77891e-82	0
Rbfox2	3.59635e-86	0.398709	0.603	0.169	4.53428e-82	0
Wasl	5.05178e-86	0.313382	0.486	0.111	6.36929e-82	0
Tmem123	6.27767e-86	0.457743	0.311	0.036	7.91488e-82	0
Ifngr2	6.72276e-86	0.467024	0.293	0.029	8.47606e-82	0
Ctcf	6.88945e-86	0.325935	0.484	0.11	8.68621e-82	0
Eno1	8.32993e-86	0.391939	0.387	0.067	1.05024e-81	0
Chic2	8.57703e-86	0.404975	0.382	0.065	1.08139e-81	0
Chchd10	1.03071e-85	0.996795	0.411	0.084	1.29952e-81	0
Lims1	1.12676e-85	0.272222	0.536	0.133	1.42062e-81	0
Mrpl14	1.60728e-85	0.451986	0.323	0.041	2.02645e-81	0
Anapc13	2.40683e-85	0.4384	0.363	0.058	3.03453e-81	0
Cpne2	2.63021e-85	0.552392	0.285	0.027	3.31616e-81	0
Emc3	3.41891e-85	0.358869	0.402	0.074	4.31056e-81	0
Bex3	4.17387e-85	0.525909	0.265	0.02	5.26242e-81	0
Cyb5r3	5.84667e-85	0.37261	0.407	0.076	7.37148e-81	0
Il6st	5.90546e-85	0.38723	0.458	0.1	7.44561e-81	0
Rtl8b	6.02844e-85	0.54678	0.258	0.018	7.60065e-81	0
Vps35	6.20776e-85	0.424935	0.361	0.057	7.82674e-81	0
Skil	6.30805e-85	0.409793	0.422	0.084	7.95319e-81	0
Stat2	6.40181e-85	0.482252	0.354	0.054	8.0714e-81	0
9530082P21Rik	7.66316e-85	0.543597	0.266	0.021	9.66172e-81	0
Zfp503	8.54973e-85	0.534325	0.377	0.066	1.07795e-80	0
Yaf2	8.74356e-85	0.32132	0.405	0.076	1.10239e-80	0
Cmpk1	9.85126e-85	0.420757	0.361	0.057	1.24205e-80	0
Dusp6	1.02287e-84	0.614509	0.285	0.028	1.28964e-80	0
Sf3b2	1.47539e-84	0.301331	0.532	0.133	1.86017e-80	0
Mrpl23	1.65143e-84	0.413881	0.345	0.051	2.08212e-80	0
Tspan14	1.6876e-84	0.262178	0.493	0.115	2.12772e-80	0
Saysd1	1.77551e-84	0.500503	0.296	0.032	2.23856e-80	0
Smc6	1.85406e-84	0.428848	0.431	0.089	2.33759e-80	0
Tspan13	2.33165e-84	0.59435	0.291	0.031	2.93974e-80	0
Ier5l	3.12554e-84	0.541072	0.252	0.016	3.94068e-80	0
Klhl5	3.1788e-84	0.406191	0.406	0.077	4.00783e-80	0
Rpn2	3.32081e-84	0.354878	0.467	0.104	4.18688e-80	0
Churc1	4.38449e-84	0.480245	0.294	0.031	5.52797e-80	0
Chmp2b	4.5612e-84	0.419794	0.362	0.058	5.75076e-80	0
Cetn2	4.92404e-84	0.512987	0.254	0.017	6.20823e-80	0
Ndufs2	5.63493e-84	0.32916	0.403	0.076	7.10453e-80	0
Palm	5.68881e-84	0.371086	0.518	0.127	7.17245e-80	0
Ppm1g	5.87117e-84	0.423365	0.316	0.039	7.40237e-80	0
Smarca5	5.89084e-84	0.416997	0.396	0.074	7.42718e-80	0
Srsf10	6.15907e-84	0.313506	0.408	0.078	7.76536e-80	0
Vps25	9.03821e-84	0.453756	0.333	0.047	1.13954e-79	0
Ndel1	9.23508e-84	0.295578	0.578	0.156	1.16436e-79	0
Micos10	1.23566e-83	0.273651	0.53	0.131	1.55792e-79	0
B4galt4	1.29862e-83	0.547735	0.255	0.017	1.63731e-79	0
Atp8a2	1.33875e-83	0.596011	0.255	0.018	1.68789e-79	0
Eif4a2	1.37335e-83	0.252867	0.587	0.159	1.73152e-79	0
Eif1ax	1.42123e-83	0.411761	0.332	0.047	1.79189e-79	0
Btbd7	1.4423e-83	0.329431	0.579	0.159	1.81846e-79	0
Ndufa12	1.44521e-83	0.321611	0.461	0.103	1.82212e-79	0
Klk8	1.62911e-83	0.556531	0.258	0.019	2.05398e-79	0
Eapp	1.76898e-83	0.468939	0.328	0.045	2.23034e-79	0
Xdh	2.88445e-83	0.557584	0.324	0.044	3.63672e-79	0
Rala	3.08934e-83	0.281029	0.446	0.095	3.89504e-79	0
Gch1	3.12032e-83	0.579854	0.257	0.019	3.9341e-79	0
Cct3	3.1373e-83	0.329528	0.378	0.065	3.9555e-79	0
Calu	3.2074e-83	0.39508	0.384	0.07	4.04389e-79	0
Mrps18c	4.79434e-83	0.429515	0.318	0.042	6.0447e-79	0
Pgp	4.84854e-83	0.402305	0.317	0.042	6.11304e-79	0
Gpx8	5.89439e-83	0.536073	0.263	0.021	7.43165e-79	0
Tns2	5.93998e-83	0.419154	0.34	0.051	7.48912e-79	0
Erap1	6.29013e-83	0.458368	0.305	0.036	7.9306e-79	0
Cnn2	6.34408e-83	0.385488	0.387	0.07	7.99862e-79	0
Irf2bp2	6.46761e-83	0.461031	0.383	0.069	8.15436e-79	0
Siah1a	6.94127e-83	0.476128	0.312	0.039	8.75155e-79	0
Adgrg1	9.06029e-83	0.382846	0.395	0.073	1.14232e-78	0
Dpm1	9.91916e-83	0.282118	0.439	0.092	1.25061e-78	0
Nrbp1	1.25215e-82	0.327805	0.394	0.074	1.57871e-78	0
Ctso	1.40673e-82	0.490691	0.288	0.031	1.7736e-78	0
Myadm	1.53798e-82	0.535138	0.289	0.031	1.93909e-78	0
Chchd1	1.76971e-82	0.379771	0.345	0.052	2.23125e-78	0
Ppm1f	1.79532e-82	0.438016	0.312	0.04	2.26354e-78	0
Cops6	2.01188e-82	0.411244	0.314	0.04	2.53658e-78	0
Pnrc2	2.28422e-82	0.422185	0.297	0.034	2.87995e-78	0
Sp1	2.66778e-82	0.462717	0.354	0.057	3.36354e-78	0
Dnajb6	2.80585e-82	0.302503	0.493	0.118	3.53762e-78	0
Lix1l	2.84544e-82	0.488588	0.281	0.028	3.58753e-78	0
Pigp	2.85414e-82	0.463397	0.289	0.031	3.59849e-78	0
Cap1	2.94943e-82	0.429513	0.363	0.061	3.71864e-78	0
Cldnd1	3.43604e-82	0.521525	0.256	0.019	4.33216e-78	0
Snw1	4.35775e-82	0.344735	0.404	0.078	5.49425e-78	0
Ergic3	4.48417e-82	0.34902	0.367	0.062	5.65364e-78	0
Dnajb9	4.65145e-82	0.537127	0.255	0.019	5.86455e-78	0
Tal1	4.72088e-82	0.55461	0.258	0.021	5.95208e-78	0
Elmo1	4.72841e-82	0.439309	0.451	0.101	5.96158e-78	0
Rsu1	5.52429e-82	0.293363	0.563	0.149	6.96502e-78	0
Ntan1	7.0448e-82	0.417001	0.354	0.057	8.88209e-78	0
Frg1	8.5221e-82	0.457174	0.325	0.046	1.07447e-77	0
Usf1	8.90144e-82	0.49652	0.263	0.022	1.12229e-77	0
Rapgef2	9.02637e-82	0.407415	0.778	0.266	1.13804e-77	0
Coro1b	1.07734e-81	0.393031	0.309	0.039	1.35832e-77	0
Ssr1	1.17126e-81	0.322888	0.359	0.059	1.47673e-77	0
Junb	1.21894e-81	0.726262	0.286	0.032	1.53684e-77	0
Pin1	1.22374e-81	0.378323	0.306	0.038	1.5429e-77	0
C1d	1.2486e-81	0.439802	0.324	0.045	1.57424e-77	0
Rad21	1.2633e-81	0.368072	0.376	0.067	1.59277e-77	0
Mgst3	1.27725e-81	0.395961	0.306	0.038	1.61035e-77	0
Slk	1.30115e-81	0.258719	0.569	0.153	1.64049e-77	0
Plin2	1.39614e-81	0.456071	0.305	0.038	1.76025e-77	0
Stat1	1.48812e-81	0.476538	0.413	0.085	1.87623e-77	0
Ninj1	1.76418e-81	0.37449	0.359	0.061	2.22427e-77	0
Nras	1.9592e-81	0.381957	0.375	0.067	2.47015e-77	0
Brd2	1.96812e-81	0.279433	0.543	0.141	2.48141e-77	0
Hdac1	2.01316e-81	0.406475	0.374	0.067	2.53819e-77	0
Txndc15	2.03698e-81	0.34771	0.352	0.057	2.56823e-77	0
2610001J05Rik	2.04344e-81	0.451901	0.272	0.025	2.57636e-77	0
Sp110	2.11681e-81	0.511946	0.288	0.032	2.66888e-77	0
Dtx3l	2.29884e-81	0.48563	0.266	0.023	2.89838e-77	0
Ncl	2.47709e-81	0.318557	0.525	0.134	3.12311e-77	0
Nbeal1	2.73766e-81	0.322363	0.627	0.184	3.45164e-77	0
Sema4c	3.47906e-81	0.531125	0.25	0.018	4.3864e-77	0
Atp2b1	3.70505e-81	0.278278	0.573	0.156	4.67133e-77	0
Cdipt	3.8013e-81	0.487152	0.311	0.041	4.79268e-77	0
Ssbp4	5.56063e-81	0.418494	0.341	0.053	7.01084e-77	0
Nav1	6.12155e-81	0.381682	0.566	0.157	7.71804e-77	0
Aimp1	6.16226e-81	0.393455	0.34	0.052	7.76938e-77	0
Kctd10	6.50109e-81	0.453196	0.338	0.052	8.19658e-77	0
Tram1	7.13607e-81	0.340746	0.367	0.063	8.99715e-77	0
Smim15	7.86575e-81	0.510618	0.258	0.021	9.91713e-77	0
Vps4b	8.27319e-81	0.378725	0.364	0.063	1.04308e-76	0
Hmgn1	9.25331e-81	0.258945	0.466	0.106	1.16666e-76	0
Hdgf	1.15516e-80	0.352005	0.399	0.077	1.45642e-76	0
Elof1	1.15922e-80	0.472364	0.261	0.022	1.46155e-76	0
Snrnp27	1.35289e-80	0.350292	0.383	0.071	1.70573e-76	0
Ubald2	1.72831e-80	0.325153	0.369	0.065	2.17906e-76	0
Tmem167	1.73305e-80	0.384689	0.371	0.066	2.18504e-76	0
Itga5	1.86686e-80	0.4358	0.341	0.054	2.35374e-76	0
Enpp4	1.89094e-80	0.515822	0.259	0.022	2.3841e-76	0
Nop53	1.90558e-80	0.270651	0.428	0.089	2.40256e-76	0
Jtb	1.91935e-80	0.355291	0.328	0.048	2.41991e-76	0
Gm4070	2.03972e-80	0.535578	0.257	0.021	2.57168e-76	0
Rpl7l1	2.23414e-80	0.430475	0.311	0.042	2.8168e-76	0
Pdcl	2.30102e-80	0.513009	0.258	0.021	2.90113e-76	0
Cops8	3.27112e-80	0.365353	0.286	0.032	4.12423e-76	0
Scoc	3.57138e-80	0.458522	0.331	0.05	4.50279e-76	0
Hspa12b	3.86239e-80	0.48925	0.376	0.07	4.8697e-76	0
Iscu	4.99678e-80	0.319639	0.408	0.082	6.29993e-76	0
Sin3b	5.10516e-80	0.406847	0.362	0.063	6.43658e-76	0
Usp18	7.23952e-80	0.533809	0.257	0.021	9.12758e-76	0
4930599N23Rik	7.62748e-80	0.598023	0.262	0.024	9.61673e-76	0
Enpep	7.65865e-80	0.379767	0.419	0.087	9.65602e-76	0
Mxra8	7.6594e-80	0.467443	0.264	0.024	9.65698e-76	0
Snf8	7.68942e-80	0.36479	0.357	0.061	9.69482e-76	0
Ptpn1	9.30204e-80	0.341206	0.373	0.067	1.1728e-75	0
Abhd16a	1.07417e-79	0.446785	0.3	0.038	1.35431e-75	0
Fam89b	1.07628e-79	0.449463	0.267	0.025	1.35697e-75	0
Tmtc1	1.25098e-79	0.523507	0.46	0.11	1.57724e-75	0
Mfap1b	1.28937e-79	0.416112	0.307	0.041	1.62564e-75	0
Dennd6a	1.35349e-79	0.337874	0.467	0.111	1.70648e-75	0
Hnrnph2	1.38579e-79	0.43184	0.308	0.042	1.74721e-75	0
Cpne3	1.51328e-79	0.416257	0.353	0.059	1.90795e-75	0
Tomm20	1.72752e-79	0.435494	0.327	0.049	2.17805e-75	0
Lmbrd1	1.88294e-79	0.278942	0.412	0.085	2.37401e-75	0
Nsmce4a	2.18773e-79	0.379008	0.314	0.043	2.75829e-75	0
Csf1	2.26336e-79	0.61148	0.282	0.032	2.85364e-75	0
Prelid1	2.34538e-79	0.256316	0.455	0.103	2.95706e-75	0
Mgat2	2.56446e-79	0.403141	0.298	0.037	3.23327e-75	0
Kank4	3.65162e-79	0.436373	0.345	0.057	4.60396e-75	0
Cenpx	3.75714e-79	0.448207	0.283	0.032	4.737e-75	0
Nr1h2	4.5991e-79	0.422925	0.314	0.044	5.79855e-75	0
Top2b	4.63505e-79	0.281268	0.433	0.095	5.84387e-75	0
Lamtor4	6.01287e-79	0.277458	0.365	0.066	7.58103e-75	0
Tbc1d20	6.97498e-79	0.37076	0.294	0.036	8.79405e-75	0
Hnrnpc	7.13507e-79	0.300156	0.529	0.14	8.99589e-75	0
Elk4	7.4682e-79	0.368933	0.373	0.069	9.41591e-75	0
Tpd52l2	8.28038e-79	0.371168	0.34	0.055	1.04399e-74	0
Ap1s2	1.07759e-78	0.480213	0.257	0.023	1.35863e-74	0
Myl6	1.12624e-78	0.569202	0.968	0.457	1.41996e-74	0
Snx17	1.20851e-78	0.340728	0.331	0.051	1.52369e-74	0
Akt1	1.49758e-78	0.40437	0.334	0.053	1.88815e-74	0
Med21	1.86109e-78	0.301518	0.333	0.052	2.34646e-74	0
Ephb1	2.00801e-78	0.564153	0.293	0.037	2.5317e-74	0
Guk1	2.01387e-78	0.459987	0.288	0.035	2.53908e-74	0
Tsc22d1	3.24542e-78	0.473034	0.664	0.217	4.09182e-74	0
Hdgfl3	3.50023e-78	0.452302	0.301	0.04	4.41309e-74	0
Wwtr1	4.42083e-78	0.272419	0.65	0.2	5.57379e-74	0
Mrps12	4.62732e-78	0.435688	0.266	0.026	5.83412e-74	0
Emc6	5.12196e-78	0.409834	0.253	0.021	6.45777e-74	0
Ifih1	6.26174e-78	0.451321	0.299	0.039	7.8948e-74	0
Bad	6.85313e-78	0.435817	0.3	0.04	8.64043e-74	0
Cdkn1b	7.79026e-78	0.39739	0.314	0.046	9.82197e-74	0
Mgat1	8.18524e-78	0.251734	0.484	0.119	1.032e-73	0
Agpat4	8.26771e-78	0.509277	0.296	0.039	1.04239e-73	0
Bcl10	8.34009e-78	0.493083	0.265	0.026	1.05152e-73	0
Lasp1	1.00899e-77	0.260883	0.399	0.08	1.27213e-73	0
Hacd4	1.06088e-77	0.536056	0.257	0.024	1.33756e-73	0
Ilk	1.126e-77	0.284527	0.38	0.072	1.41966e-73	0
Degs1	1.13772e-77	0.266154	0.402	0.082	1.43443e-73	0
Acaa2	1.37139e-77	0.257046	0.396	0.079	1.72905e-73	0
Cdc42ep4	1.50884e-77	0.49902	0.257	0.024	1.90235e-73	0
Prdm1	1.9362e-77	0.714253	0.251	0.022	2.44116e-73	0
Casp8	2.87708e-77	0.358694	0.365	0.067	3.62742e-73	0
Llph	2.87936e-77	0.387488	0.3	0.04	3.63029e-73	0
Tmem179b	2.92356e-77	0.420033	0.277	0.031	3.68603e-73	0
Pik3r6	3.0066e-77	0.477667	0.25	0.021	3.79072e-73	0
Pafah1b2	3.76632e-77	0.372133	0.332	0.053	4.74858e-73	0
Cfap20	4.02982e-77	0.40624	0.339	0.056	5.0808e-73	0
Prpf8	4.93359e-77	0.377107	0.323	0.05	6.22027e-73	0
Fam32a	6.27449e-77	0.416145	0.3	0.04	7.91088e-73	0
Tvp23b	7.12729e-77	0.468246	0.271	0.029	8.98609e-73	0
Psip1	7.97191e-77	0.429918	0.304	0.042	1.0051e-72	0
Hint3	9.00316e-77	0.34106	0.346	0.06	1.13512e-72	0
Hif1a	1.01478e-76	0.420466	0.385	0.077	1.27944e-72	0
Ube2q1	1.08251e-76	0.372139	0.312	0.046	1.36483e-72	0
Ywhag	1.28149e-76	0.39662	0.321	0.05	1.61571e-72	0
Aida	1.51308e-76	0.474677	0.292	0.038	1.90769e-72	0
Uqcrfs1	1.51722e-76	0.431772	0.29	0.037	1.91291e-72	0
Khdrbs1	2.05698e-76	0.27523	0.444	0.102	2.59344e-72	0
Mindy2	2.14404e-76	0.354574	0.435	0.1	2.70321e-72	0
Akirin1	2.23925e-76	0.386093	0.291	0.037	2.82325e-72	0
M6pr	2.43531e-76	0.318887	0.332	0.054	3.07044e-72	0
Ro60	2.5816e-76	0.397064	0.3	0.041	3.25488e-72	0
Dhx15	2.59936e-76	0.29965	0.416	0.09	3.27727e-72	0
Ccdc47	3.3499e-76	0.391583	0.364	0.068	4.22356e-72	0
Cul3	4.73215e-76	0.34564	0.44	0.102	5.96629e-72	0
Mettl9	4.80105e-76	0.363926	0.345	0.059	6.05317e-72	0
9530026P05Rik	5.06473e-76	0.451063	0.706	0.248	6.38561e-72	0
Sema6d	5.06788e-76	0.505763	0.361	0.068	6.38958e-72	0
Lsm12	6.56233e-76	0.443068	0.265	0.028	8.27378e-72	0
Uqcrc2	6.56839e-76	0.334161	0.391	0.08	8.28143e-72	0
Arpc5l	8.01204e-76	0.286408	0.322	0.05	1.01016e-71	0
Cfdp1	1.01404e-75	0.253378	0.541	0.149	1.2785e-71	0
Tmed4	1.04053e-75	0.439313	0.275	0.032	1.3119e-71	0
Fdx1	1.13602e-75	0.379299	0.294	0.039	1.43229e-71	0
Tbc1d2b	1.18767e-75	0.445758	0.276	0.032	1.49741e-71	0
Marcksl1	1.43307e-75	0.541594	0.257	0.025	1.80682e-71	0
Hmgn3	1.46385e-75	0.410145	0.299	0.042	1.84562e-71	0
Abi2	1.6036e-75	0.419568	0.351	0.064	2.02182e-71	0
Ptprg	1.60781e-75	0.765592	0.955	0.481	2.02712e-71	0
Tiprl	1.70689e-75	0.391697	0.288	0.037	2.15205e-71	0
Glmp	1.88636e-75	0.328954	0.374	0.073	2.37833e-71	0
Uba1	2.04096e-75	0.322925	0.333	0.055	2.57325e-71	0
Pin4	2.25107e-75	0.427902	0.267	0.029	2.83815e-71	0
Lifr	2.36832e-75	0.333383	0.484	0.125	2.98598e-71	0
Pim1	2.45445e-75	0.518199	0.259	0.026	3.09457e-71	0
Trim56	2.46771e-75	0.422458	0.292	0.039	3.11128e-71	0
Slit3	2.71473e-75	0.449743	0.441	0.106	3.42273e-71	0
Laptm4b	2.83467e-75	0.386099	0.355	0.065	3.57396e-71	0
Mien1	4.10175e-75	0.360599	0.282	0.035	5.17149e-71	0
Ebna1bp2	4.32511e-75	0.393568	0.274	0.032	5.45309e-71	0
Cct8	4.4933e-75	0.297447	0.336	0.057	5.66515e-71	0
Blvrb	5.36676e-75	0.324038	0.307	0.046	6.76642e-71	0
Rpp21	5.84435e-75	0.374952	0.288	0.037	7.36855e-71	0
Hspa4	6.41517e-75	0.296242	0.418	0.093	8.08825e-71	0
Cox20	6.61487e-75	0.399048	0.297	0.042	8.34003e-71	0
Ralb	7.90456e-75	0.364142	0.365	0.07	9.96607e-71	0
Zcrb1	1.13773e-74	0.308846	0.363	0.069	1.43446e-70	0
Rab31	1.162e-74	0.458059	0.317	0.05	1.46505e-70	0
Fmnl2	1.50753e-74	0.407112	0.646	0.209	1.90069e-70	0
Psmg4	1.70125e-74	0.371205	0.286	0.037	2.14493e-70	0
Lbhd1	2.02865e-74	0.35022	0.287	0.037	2.55772e-70	0
Puf60	2.26694e-74	0.33593	0.358	0.067	2.85815e-70	0
Keap1	2.51638e-74	0.332148	0.333	0.057	3.17266e-70	0
Cnep1r1	2.69061e-74	0.373112	0.275	0.033	3.39233e-70	0
Trappc2l	3.34927e-74	0.370037	0.304	0.044	4.22276e-70	0
Sh3gl1	4.04453e-74	0.390512	0.281	0.036	5.09934e-70	0
Bud31	4.55467e-74	0.354406	0.286	0.037	5.74253e-70	0
Cbx5	5.34454e-74	0.318546	0.43	0.101	6.7384e-70	0
Cnot6	6.0331e-74	0.292805	0.448	0.108	7.60653e-70	0
Zdhhc18	6.59723e-74	0.380839	0.35	0.065	8.31778e-70	0
Top1	7.06342e-74	0.272936	0.622	0.194	8.90556e-70	0
Pdcd6ip	7.32361e-74	0.317614	0.392	0.083	9.2336e-70	0
Serpinb9	7.99151e-74	0.430348	0.26	0.028	1.00757e-69	0
Piezo1	9.60271e-74	0.268144	0.399	0.086	1.21071e-69	0
Plxna2	1.05298e-73	0.320561	0.526	0.148	1.32759e-69	0
Id2	1.10855e-73	0.471617	0.518	0.15	1.39766e-69	0
Rnh1	1.19792e-73	0.270759	0.396	0.084	1.51033e-69	0
Myh9	1.34459e-73	0.313532	0.641	0.206	1.69526e-69	0
Rhog	1.77482e-73	0.438059	0.256	0.027	2.23769e-69	0
Sertad2	1.82019e-73	0.269045	0.401	0.087	2.2949e-69	0
Pitpnb	1.86495e-73	0.311456	0.373	0.074	2.35133e-69	0
Lsm4	2.21334e-73	0.364069	0.301	0.045	2.79058e-69	0
Hbegf	2.31987e-73	0.428531	0.334	0.058	2.92489e-69	0
Cemip2	2.44358e-73	0.278189	0.449	0.11	3.08087e-69	0
Mrpl4	2.52799e-73	0.398977	0.303	0.045	3.18729e-69	0
1810026B05Rik	2.57436e-73	0.300938	0.396	0.085	3.24576e-69	0
Vav3	2.75223e-73	0.407506	0.416	0.096	3.47002e-69	0
Ceacam1	3.89502e-73	0.470748	0.259	0.028	4.91084e-69	0
Sec13	4.03316e-73	0.365963	0.265	0.031	5.08501e-69	0
Pcnx	4.28472e-73	0.337281	0.457	0.115	5.40218e-69	0
Hspd1	4.44269e-73	0.290665	0.348	0.064	5.60135e-69	0
Lsm6	5.22138e-73	0.410227	0.264	0.03	6.58311e-69	0
Btbd1	5.79129e-73	0.264725	0.414	0.093	7.30166e-69	0
Alg5	8.20927e-73	0.412304	0.257	0.028	1.03502e-68	0
Idnk	8.77516e-73	0.308999	0.349	0.065	1.10637e-68	0
Mrpl34	9.9174e-73	0.390232	0.257	0.028	1.25039e-68	0
Uaca	1.21347e-72	0.293996	0.456	0.115	1.52995e-68	0
Dctn4	1.23127e-72	0.290854	0.419	0.097	1.55239e-68	0
Herpud1	1.38731e-72	0.295391	0.387	0.082	1.74912e-68	0
Rbbp7	1.50966e-72	0.394412	0.277	0.035	1.90338e-68	0
Atp6v1d	1.95366e-72	0.294988	0.344	0.062	2.46318e-68	0
Hadhb	2.1139e-72	0.383299	0.313	0.05	2.6652e-68	0
Flii	2.12129e-72	0.421548	0.286	0.039	2.67453e-68	0
Slc39a1	2.23074e-72	0.485168	0.258	0.029	2.81252e-68	0
Elf1	2.429e-72	0.345181	0.708	0.245	3.06248e-68	0
Pdia5	2.65152e-72	0.531586	0.373	0.079	3.34304e-68	0
Rit1	2.65785e-72	0.348014	0.298	0.044	3.35102e-68	0
Tll1	3.48633e-72	0.820906	0.271	0.035	4.39556e-68	0
Aph1a	3.92814e-72	0.402772	0.256	0.028	4.9526e-68	0
Uba2	4.06244e-72	0.371004	0.325	0.056	5.12193e-68	0
Vat1	4.21e-72	0.407447	0.25	0.025	5.30797e-68	0
Snhg8	4.91968e-72	0.457536	0.266	0.032	6.20273e-68	0
Tmx1	5.02894e-72	0.385053	0.258	0.029	6.34049e-68	0
Gatad1	5.11061e-72	0.269905	0.374	0.076	6.44346e-68	0
Commd7	6.58808e-72	0.373398	0.283	0.039	8.30625e-68	0
Abhd17b	7.58034e-72	0.308574	0.38	0.08	9.55729e-68	0
Ctdnep1	8.29277e-72	0.35141	0.279	0.037	1.04555e-67	0
Psmd12	8.55319e-72	0.296894	0.349	0.066	1.07839e-67	0
Map1b	1.09655e-71	0.505789	0.275	0.036	1.38253e-67	0
Sult1a1	1.22627e-71	0.410702	0.253	0.027	1.54608e-67	0
Txndc9	1.33302e-71	0.33991	0.316	0.052	1.68067e-67	0
Chtop	1.36829e-71	0.325265	0.316	0.052	1.72515e-67	0
Efr3b	1.80436e-71	0.51582	0.251	0.027	2.27493e-67	0
Gle1	1.89025e-71	0.3373	0.282	0.039	2.38322e-67	0
Atp8a1	2.17046e-71	0.315133	0.456	0.117	2.73652e-67	0
Ston1	2.50373e-71	0.472332	0.314	0.052	3.15671e-67	0
Glrx3	3.12896e-71	0.265312	0.37	0.075	3.94499e-67	0
Twf2	3.16566e-71	0.364119	0.266	0.032	3.99126e-67	0
Slc23a2	3.70652e-71	0.361135	0.326	0.058	4.67318e-67	0
Psmd13	3.75109e-71	0.26075	0.379	0.08	4.72938e-67	0
Clstn1	5.01708e-71	0.348342	0.338	0.062	6.32553e-67	0
Dph3	5.7553e-71	0.333319	0.279	0.038	7.25629e-67	0
Snrpd3	5.8276e-71	0.286135	0.338	0.062	7.34743e-67	0
Copb1	6.58593e-71	0.395506	0.324	0.057	8.30354e-67	0
Tm2d3	7.35214e-71	0.275039	0.316	0.052	9.26958e-67	0
Map3k11	9.16264e-71	0.346725	0.306	0.049	1.15523e-66	0
Utp11	9.24154e-71	0.250987	0.367	0.075	1.16517e-66	0
Nme1	9.28824e-71	0.251153	0.328	0.058	1.17106e-66	0
Srgap2	9.75829e-71	0.276078	0.651	0.217	1.23033e-66	0
Tcf3	1.02005e-70	0.398327	0.316	0.054	1.28608e-66	0
Spag7	1.09633e-70	0.400623	0.266	0.033	1.38225e-66	0
Rrp1	1.25398e-70	0.296196	0.362	0.074	1.58102e-66	0
Ankrd28	1.30459e-70	0.323081	0.447	0.114	1.64482e-66	0
Pxdn	1.44061e-70	0.467377	0.268	0.035	1.81632e-66	0
4921524J17Rik	1.69129e-70	0.338764	0.295	0.044	2.13238e-66	0
Kat6a	1.99329e-70	0.262664	0.431	0.106	2.51314e-66	0
Itpripl2	2.59002e-70	0.40275	0.271	0.036	3.26549e-66	0
Ssna1	2.79604e-70	0.268952	0.329	0.059	3.52525e-66	0
Kdm1a	2.89221e-70	0.289461	0.364	0.075	3.6465e-66	0
Arf2	3.42683e-70	0.414899	0.252	0.028	4.32055e-66	0
Eif2ak2	5.26823e-70	0.517415	0.261	0.032	6.64218e-66	0
Pcif1	5.57017e-70	0.427013	0.299	0.047	7.02287e-66	0
Mfap1a	5.63912e-70	0.461302	0.256	0.03	7.10981e-66	0
Smarcb1	5.70621e-70	0.364985	0.303	0.048	7.19439e-66	0
Idh3b	5.73665e-70	0.261429	0.341	0.065	7.23277e-66	0
Tmed3	6.05707e-70	0.334306	0.279	0.039	7.63676e-66	0
Pcdhg-all	1.13509e-69	0.271183	0.576	0.179	1.43113e-65	0
Acadl	1.36584e-69	0.333222	0.335	0.063	1.72205e-65	0
Hexa	1.41594e-69	0.253849	0.365	0.076	1.78522e-65	0
Denr	1.65655e-69	0.333807	0.323	0.058	2.08858e-65	0
Polr3gl	2.00925e-69	0.402738	0.275	0.038	2.53326e-65	0
Ctdsp1	2.11561e-69	0.284771	0.32	0.056	2.66736e-65	0
Rap2a	3.02395e-69	0.419549	0.26	0.032	3.81259e-65	0
Spr	3.03611e-69	0.258962	0.332	0.062	3.82793e-65	0
Efcab14	3.35847e-69	0.289369	0.345	0.067	4.23436e-65	0
Vkorc1	4.27475e-69	0.392804	0.273	0.037	5.38961e-65	0
Rasgrf2	4.3769e-69	0.494902	0.274	0.039	5.5184e-65	0
Ppp6c	4.537e-69	0.310123	0.317	0.055	5.72024e-65	0
Ltbr	4.91137e-69	0.333142	0.292	0.045	6.19226e-65	0
2610203C22Rik	5.66458e-69	0.521318	0.252	0.03	7.1419e-65	0
Sra1	8.62237e-69	0.388877	0.258	0.032	1.08711e-64	0
Vapb	1.38445e-68	0.279928	0.392	0.091	1.74551e-64	0
Skp1a	1.41324e-68	0.263186	0.376	0.082	1.78182e-64	0
Tm6sf1	1.96483e-68	0.362262	0.264	0.034	2.47726e-64	0
Tsg101	2.57577e-68	0.303848	0.296	0.047	3.24754e-64	0
Mxra7	2.64822e-68	0.272137	0.351	0.072	3.33888e-64	0
Mrpl51	2.70221e-68	0.305516	0.304	0.051	3.40695e-64	0
Ppp4r3b	2.92331e-68	0.273533	0.383	0.085	3.68571e-64	0
Sema3g	3.32571e-68	0.434493	0.389	0.092	4.19306e-64	0
Ucp2	3.65974e-68	0.459799	0.261	0.034	4.6142e-64	0
Sgpp1	3.69589e-68	0.261736	0.392	0.089	4.65978e-64	0
Sox13	3.94045e-68	0.358737	0.313	0.055	4.96811e-64	0
Mrpl42	5.58385e-68	0.309007	0.324	0.06	7.04012e-64	0
2023-03-05	7.54809e-68	0.269653	0.391	0.089	9.51663e-64	0
Nectin2	1.09026e-67	0.316835	0.286	0.044	1.3746e-63	0
Nostrin	1.24653e-67	0.444976	0.32	0.059	1.57163e-63	0
Prxl2c	1.60334e-67	0.384075	0.27	0.038	2.02149e-63	0
Ppdpf	1.62927e-67	0.261134	0.359	0.076	2.05419e-63	0
Rad23a	1.83064e-67	0.29127	0.279	0.042	2.30807e-63	0
Midn	1.90569e-67	0.283103	0.345	0.07	2.40269e-63	0
Glrx5	1.94309e-67	0.361446	0.257	0.032	2.44985e-63	0
Pcdh1	2.41061e-67	0.294896	0.347	0.072	3.03929e-63	0
Pfdn6	2.46069e-67	0.304328	0.284	0.043	3.10243e-63	0
Cops7a	2.55701e-67	0.429759	0.253	0.032	3.22388e-63	0
Ccm2l	2.84812e-67	0.339309	0.319	0.059	3.59091e-63	0
Dnajc10	3.20714e-67	0.387408	0.322	0.061	4.04357e-63	0
Msl1	3.33181e-67	0.363188	0.296	0.049	4.20074e-63	0
Copb2	3.46646e-67	0.355081	0.291	0.047	4.37051e-63	0
Atf4	3.78547e-67	0.302886	0.308	0.054	4.77272e-63	0
Maf1	4.01597e-67	0.356368	0.28	0.042	5.06333e-63	0
Psmd6	4.45633e-67	0.296129	0.299	0.05	5.61854e-63	0
Rftn1	5.19817e-67	0.32218	0.335	0.066	6.55385e-63	0
Hoxb5	6.52558e-67	0.397836	0.278	0.042	8.22746e-63	0
C2cd2	7.01158e-67	0.296866	0.33	0.063	8.8402e-63	0
Abracl	8.31509e-67	0.32203	0.283	0.044	1.04837e-62	0
Csnk2a2	9.97147e-67	0.33517	0.298	0.051	1.2572e-62	0
Arhgef10	1.11973e-66	0.411743	0.267	0.037	1.41176e-62	0
Prkd1	1.24485e-66	0.349335	0.436	0.115	1.56951e-62	0
Nosip	1.25603e-66	0.345144	0.268	0.038	1.5836e-62	0
Ipo11	1.85345e-66	0.257132	0.378	0.086	2.33682e-62	0
Tmem126a	1.93197e-66	0.32982	0.267	0.037	2.43582e-62	0
Mrpl18	2.1787e-66	0.291056	0.277	0.042	2.74691e-62	0
Cnih1	2.36452e-66	0.357535	0.257	0.033	2.98118e-62	0
Rela	5.3131e-66	0.326098	0.261	0.036	6.69875e-62	0
Hmgb2	5.38369e-66	0.37216	0.296	0.05	6.78775e-62	0
Impdh1	7.32315e-66	0.38285	0.261	0.036	9.23302e-62	0
Zmat2	8.50027e-66	0.295832	0.315	0.059	1.07171e-61	0
Acvr2a	1.08066e-65	0.308893	0.345	0.072	1.3625e-61	0
Nfu1	1.19993e-65	0.273101	0.274	0.041	1.51288e-61	0
Ccdc28b	1.29575e-65	0.379586	0.262	0.037	1.63368e-61	0
Fmc1	2.01597e-65	0.405005	0.252	0.033	2.54173e-61	0
Psmd3	2.28847e-65	0.311679	0.291	0.048	2.8853e-61	0
Usf2	2.38974e-65	0.27031	0.296	0.051	3.01299e-61	0
Akap12	2.62565e-65	0.515059	0.268	0.04	3.31042e-61	0
Mphosph8	2.81328e-65	0.329692	0.359	0.08	3.54698e-61	0
Phax	3.23914e-65	0.337126	0.276	0.042	4.0839e-61	0
Akirin2	3.37714e-65	0.254111	0.316	0.059	4.2579e-61	0
1810058I24Rik	3.43452e-65	0.26861	0.318	0.061	4.33024e-61	0
Gstm1	3.96506e-65	0.265209	0.366	0.082	4.99915e-61	0
Derl1	6.2761e-65	0.297402	0.29	0.048	7.9129e-61	0
Mpdz	7.41046e-65	0.305804	0.335	0.069	9.3431e-61	0
Yipf5	8.98542e-65	0.325604	0.261	0.037	1.13288e-60	0
Naxe	1.23674e-64	0.328055	0.264	0.038	1.55929e-60	0
Git1	1.42718e-64	0.359811	0.262	0.037	1.79939e-60	0
2023-09-04	1.74652e-64	0.400968	0.31	0.059	2.20201e-60	0
Parp9	1.86072e-64	0.294785	0.278	0.044	2.34599e-60	0
Pacs1	2.55171e-64	0.296496	0.374	0.088	3.2172e-60	0
Fth1	2.79689e-64	0.34135	0.984	0.509	3.52632e-60	0
Gtpbp2	4.1135e-64	0.318075	0.279	0.045	5.1863e-60	0
Cers2	7.3148e-64	0.311947	0.3	0.054	9.2225e-60	0
Gde1	1.03182e-63	0.292131	0.267	0.04	1.30092e-59	0
Kif2a	1.24208e-63	0.29867	0.331	0.068	1.56602e-59	0
H2-Aa	1.55713e-63	0.38125	0.294	0.054	1.96322e-59	0
Rab8a	2.07921e-63	0.284263	0.278	0.045	2.62147e-59	0
Zfp664	2.68765e-63	0.303003	0.29	0.051	3.38859e-59	0
Armc1	2.71376e-63	0.257286	0.278	0.045	3.42151e-59	0
Cttnbp2nl	2.74385e-63	0.379971	0.305	0.058	3.45944e-59	0
Aprt	9.03705e-63	0.250767	0.294	0.052	1.13939e-58	0
Tspan3	1.04441e-62	0.25072	0.314	0.061	1.3168e-58	0
Pdrg1	1.65876e-62	0.254394	0.267	0.041	2.09137e-58	0
Ypel5	2.22576e-62	0.259385	0.294	0.053	2.80624e-58	0
Eci1	2.46037e-62	0.346317	0.266	0.042	3.10203e-58	0
Mknk2	2.70385e-62	0.316342	0.26	0.039	3.40901e-58	0
Api5	2.8325e-62	0.275696	0.296	0.055	3.57122e-58	0
Necap2	3.16524e-62	0.371122	0.257	0.038	3.99074e-58	0
Rrm2b	3.25617e-62	0.261583	0.29	0.052	4.10538e-58	0
Actl6a	4.12782e-62	0.339616	0.262	0.04	5.20436e-58	0
Car8	4.48601e-62	0.45844	0.257	0.039	5.65596e-58	0
Chchd7	5.46112e-62	0.270416	0.267	0.042	6.88538e-58	0
U2af2	6.83198e-62	0.286955	0.302	0.057	8.61376e-58	0
Sorbs3	7.37557e-62	0.301269	0.277	0.047	9.29912e-58	0
Sh3d21	8.41207e-62	0.34295	0.25	0.036	1.06059e-57	0
St3gal4	9.76738e-62	0.418139	0.516	0.17	1.23147e-57	0
Cd59a	1.0408e-61	0.451273	0.269	0.044	1.31224e-57	0
Smim7	1.21856e-61	0.294084	0.293	0.054	1.53636e-57	0
Colgalt2	1.47835e-61	0.322622	0.26	0.04	1.8639e-57	0
Clcn4	1.85717e-61	0.284284	0.282	0.049	2.34152e-57	0
Casp7	2.40729e-61	0.323206	0.253	0.037	3.03511e-57	0
Impad1	2.98252e-61	0.36322	0.253	0.037	3.76036e-57	0
Psmd2	2.9897e-61	0.268727	0.289	0.052	3.76942e-57	0
Pla2r1	3.94387e-61	0.302996	0.339	0.075	4.97243e-57	0
Tcf7l1	1.1418e-60	0.269076	0.393	0.102	1.43959e-56	0
Socs5	1.40274e-60	0.310028	0.279	0.049	1.76858e-56	0
Atp11c	1.84437e-60	0.285834	0.388	0.1	2.32538e-56	0
Smndc1	2.00733e-60	0.296927	0.281	0.05	2.53085e-56	0
Slc35b1	2.45544e-60	0.286873	0.273	0.047	3.09581e-56	0
Bola2	3.10224e-60	0.270937	0.306	0.061	3.9113e-56	0
Chn2	4.23188e-60	0.266959	0.504	0.159	5.33556e-56	0
Zfas1	4.93451e-60	0.342509	0.252	0.038	6.22143e-56	0
Colgalt1	5.75392e-60	0.323239	0.256	0.04	7.25454e-56	0
Pip5k1c	6.96046e-60	0.295502	0.273	0.047	8.77574e-56	0
Eml1	2.01132e-59	0.330991	0.31	0.064	2.53587e-55	0
Tor1aip2	2.03911e-59	0.282102	0.298	0.058	2.57092e-55	0
Pdzd8	2.16639e-59	0.37385	0.278	0.051	2.73138e-55	0
Ube2a	5.03465e-59	0.275785	0.269	0.047	6.34768e-55	0
Stxbp1	7.109e-59	0.276417	0.267	0.046	8.96303e-55	0
Ei24	9.59942e-59	0.256276	0.265	0.044	1.21029e-54	0
Ccdc186	1.97648e-58	0.258543	0.303	0.062	2.49194e-54	0
Syap1	1.98232e-58	0.257921	0.286	0.054	2.49931e-54	0
Slu7	2.38342e-58	0.294813	0.254	0.041	3.00502e-54	0
Lin7c	2.71745e-58	0.260001	0.258	0.043	3.42616e-54	0
Rab5b	5.13533e-58	0.295726	0.279	0.052	6.47462e-54	0
Dock4	5.53464e-58	0.308137	0.764	0.314	6.97807e-54	0
Icam1	7.24214e-58	0.477969	0.277	0.052	9.13088e-54	0
Slain2	8.46132e-58	0.286291	0.296	0.06	1.0668e-53	0
Pip4k2a	8.68727e-58	0.261055	0.439	0.129	1.09529e-53	0
Cops5	9.21728e-58	0.322783	0.253	0.041	1.16212e-53	0
Tshz2	1.00318e-57	0.378547	0.702	0.281	1.26481e-53	0
Wbp4	1.49738e-57	0.27578	0.34	0.081	1.88789e-53	0
Kbtbd2	1.51717e-57	0.30147	0.265	0.047	1.91285e-53	0
Mcfd2	1.955e-57	0.268303	0.251	0.04	2.46487e-53	0
Uba7	2.0362e-57	0.262493	0.257	0.043	2.56724e-53	0
Adcy4	6.78561e-57	0.302712	0.275	0.052	8.5553e-53	0
Lnx2	7.04428e-57	0.262807	0.329	0.076	8.88143e-53	0
Bbip1	1.26982e-56	0.319584	0.256	0.043	1.60099e-52	0
Prickle2	1.76704e-56	0.328399	0.31	0.069	2.22789e-52	0
Tpp1	1.77471e-56	0.316054	0.28	0.055	2.23756e-52	0
Cers4	1.90379e-56	0.265518	0.29	0.059	2.4003e-52	0
Hipk1	2.0464e-56	0.251378	0.327	0.076	2.5801e-52	0
Fbxo28	2.77796e-56	0.327791	0.254	0.043	3.50245e-52	0
Cd74	2.3275e-55	0.677982	0.414	0.14	2.93452e-51	0
Zfp326	4.95446e-55	0.262632	0.268	0.051	6.24658e-51	0
Raph1	6.66766e-55	0.25508	0.335	0.083	8.40658e-51	0
Ppp3cb	7.1915e-55	0.270921	0.289	0.061	9.06705e-51	0
Ifi27l2a	1.73657e-54	0.767279	0.271	0.057	2.18947e-50	0
Ezh2	2.41939e-53	0.464647	0.271	0.056	3.05037e-49	0
Plxna4	3.1621e-53	0.326913	0.339	0.088	3.98677e-49	0
Trim12c	5.64135e-53	0.336704	0.259	0.05	7.11261e-49	0
Ccdc88a	1.35509e-52	0.283805	0.338	0.088	1.7085e-48	0
Smad5	1.56441e-51	0.293633	0.27	0.057	1.97241e-47	0
Lrp5	1.58246e-51	0.325709	0.272	0.057	1.99517e-47	0
Arhgap23	1.92822e-51	0.260418	0.287	0.064	2.4311e-47	0
Cdyl2	2.64774e-48	0.267878	0.261	0.057	3.33826e-44	0
Fgd6	2.85355e-48	0.259335	0.25	0.051	3.59776e-44	0
Rps15	2.63525e-45	0.32093	0.966	0.491	3.32253e-41	0
Timp3	8.19101e-18	0.38108	0.955	0.709	1.03272e-13	0
Magi2	1.74665e-169	1.97062	0.885	0.303	2.20218e-165	1
Cmss1	5.63365e-168	1.09243	1	0.995	7.10291e-164	1
Slc12a1	8.41575e-168	1.70231	0.731	0.167	1.06106e-163	1
Erbb4	6.04611e-157	1.54862	0.609	0.1	7.62294e-153	1
Kap	1.6155e-150	1.44794	0.949	0.432	2.03682e-146	1
Slc8a1	4.99659e-149	1.29361	0.699	0.172	6.2997e-145	1
Pkhd1	5.85362e-132	1.23947	0.86	0.269	7.38025e-128	1
Gpx3	1.11879e-131	1.19781	0.997	0.766	1.41057e-127	1
Slc12a3	1.60448e-130	1.5456	0.668	0.185	2.02293e-126	1
Gphn	1.05428e-127	0.989258	0.989	0.927	1.32924e-123	1
Abca13	4.97131e-126	1.62574	0.434	0.056	6.26782e-122	1
Neat1	6.42344e-116	1.05079	0.976	0.714	8.09867e-112	1
Egf	2.12505e-114	1.56469	0.427	0.064	2.67926e-110	1
Ank3	4.77556e-113	1.17249	0.853	0.311	6.02103e-109	1
Bicc1	4.46719e-110	1.16712	0.695	0.191	5.63223e-106	1
Camk1d	1.29728e-109	1.05184	0.955	0.837	1.63561e-105	1
Fxyd2	5.45824e-108	1.14067	0.785	0.272	6.88175e-104	1
Slc27a2	4.55062e-105	1.03179	0.799	0.262	5.73742e-101	1
Ptprd	5.19915e-105	0.997052	0.795	0.258	6.55509e-101	1
Esrrg	3.88317e-104	0.963464	0.938	0.389	4.8959e-100	1
Rbms3	2.83375e-103	1.50739	0.447	0.086	3.5728e-99	1
Acsm2	9.85752e-103	0.945194	0.819	0.28	1.24284e-98	1
Rbm47	5.88479e-102	1.03418	0.647	0.167	7.41954e-98	1
Abcc2	6.66858e-102	0.980085	0.881	0.346	8.40774e-98	1
[truncated: 1,727 more rows]

## Sheet: Cluster Genes - A2Ctrl
Table S5	Cluster marker genes by adjusted p-value for each cluster in the A2 Ctrl sample
gene	p_val	avg_log2FC	pct.1	pct.2	p_val_adj	cluster
Gpx3	1.71026e-16	0.290659	0.974	0.962	1.78209e-12	0
Neat1	4.72095e-16	0.339954	0.932	0.917	4.91923e-12	0
Slc12a3	1.51036e-14	0.739461	0.645	0.586	1.57379e-10	0
Slc8a1	1.50413e-13	1.2194	0.568	0.498	1.5673e-09	0
Slc12a1	4.89964e-12	0.79212	0.578	0.519	5.10542e-08	0
Mecom	4.40395e-09	0.84056	0.415	0.367	4.58892e-05	0
Magi2	8.32112e-08	0.643325	0.604	0.596	0.00086706	0
Slc12a3	7.48896e-37	0.63638	0.839	0.542	7.8035e-33	1
Egf	1.51798e-35	0.710044	0.475	0.187	1.58173e-31	1
Slc8a1	1.16445e-31	0.44082	0.77	0.453	1.21335e-27	1
Erbb4	2.35622e-31	0.543678	0.491	0.213	2.45518e-27	1
Abca13	1.0049e-26	0.527477	0.426	0.182	1.04711e-22	1
Phactr1	8.93973e-25	0.435398	0.358	0.145	9.3152e-21	1
Slc12a1	5.38891e-23	0.383895	0.774	0.474	5.61524e-19	1
Cacnb4	6.84398e-23	0.389625	0.361	0.15	7.13143e-19	1
Mecom	1.31293e-22	0.358056	0.605	0.322	1.36808e-18	1
Rgs6	3.44347e-22	0.597854	0.265	0.098	3.5881e-18	1
Car12	6.10099e-20	0.394236	0.37	0.164	6.35723e-16	1
Nr3c2	4.46166e-19	0.544697	0.342	0.157	4.64905e-15	1
Kng2	5.27185e-19	0.340809	0.433	0.205	5.49327e-15	1
Maml3	3.94426e-17	0.442381	0.312	0.145	4.10991e-13	1
Calb1	9.14388e-17	0.297597	0.33	0.152	9.52793e-13	1
Zeb2	9.61874e-17	0.376372	0.47	0.251	1.00227e-12	1
Fxyd2	4.21264e-16	0.296333	0.777	0.49	4.38957e-12	1
Utrn	4.35027e-16	0.414153	0.358	0.179	4.53298e-12	1
Wnk1	5.79774e-16	0.344368	0.57	0.331	6.04124e-12	1
Trpm7	7.35092e-16	0.322183	0.479	0.256	7.65966e-12	1
Defb1	1.33348e-15	0.346735	0.304	0.139	1.38949e-11	1
Ranbp3l	1.39768e-15	0.404297	0.325	0.155	1.45638e-11	1
Itpr2	2.96612e-15	0.304365	0.414	0.218	3.0907e-11	1
Arl15	4.78685e-15	0.338117	0.584	0.352	4.9879e-11	1
Epb41l5	6.70478e-15	0.375513	0.272	0.123	6.98638e-11	1
Tmcc3	9.89814e-15	0.36362	0.26	0.119	1.03139e-10	1
Klhl3	1.10167e-14	0.299944	0.282	0.129	1.14794e-10	1
Plcl1	1.85681e-14	0.254631	0.481	0.261	1.9348e-10	1
Slc22a12	2.0746e-14	0.261354	0.337	0.163	2.16173e-10	1
Stox2	2.07642e-14	0.307252	0.274	0.128	2.16363e-10	1
Dock8	2.09783e-14	0.354242	0.258	0.117	2.18594e-10	1
Stk39	3.00165e-14	0.391164	0.265	0.122	3.12772e-10	1
Ccdc141	5.22495e-14	0.263327	0.284	0.132	5.4444e-10	1
Ces1f	5.73562e-14	0.259763	0.293	0.137	5.97651e-10	1
Nckap5	6.05442e-14	0.290646	0.268	0.124	6.30871e-10	1
Ppargc1a	7.34987e-14	0.322212	0.33	0.163	7.65857e-10	1
Aldob	8.23741e-14	0.255	0.393	0.201	8.58338e-10	1
Cgnl1	1.11408e-13	0.288015	0.507	0.281	1.16087e-09	1
Bckdhb	1.94649e-13	0.251914	0.307	0.15	2.02825e-09	1
Myo1d	1.97947e-13	0.304198	0.356	0.185	2.06261e-09	1
Hpn	2.02631e-13	0.295059	0.295	0.143	2.11141e-09	1
Wnk4	2.98659e-13	0.283817	0.323	0.16	3.11203e-09	1
Ank3	5.10901e-13	0.261512	0.779	0.51	5.32359e-09	1
Smyd3	6.06729e-13	0.311801	0.314	0.16	6.32211e-09	1
Cobll1	9.29945e-13	0.288777	0.418	0.228	9.69002e-09	1
Ssh2	1.39182e-12	0.290255	0.307	0.157	1.45028e-08	1
Myo18a	1.75657e-12	0.293233	0.402	0.223	1.83035e-08	1
Tfcp2l1	2.29111e-12	0.291404	0.281	0.138	2.38734e-08	1
Phf21a	2.50286e-12	0.314397	0.414	0.232	2.60798e-08	1
Vegfa	2.80832e-12	0.29272	0.332	0.173	2.92627e-08	1
Myo10	7.45645e-12	0.345185	0.312	0.165	7.76962e-08	1
Mertk	8.93373e-12	0.288885	0.312	0.166	9.30895e-08	1
Larp1b	1.59337e-11	0.302165	0.272	0.137	1.66029e-07	1
Cspp1	1.97809e-11	0.262063	0.361	0.198	2.06117e-07	1
Stard10	2.02404e-11	0.254292	0.319	0.167	2.10905e-07	1
Nbea	2.61726e-11	0.305576	0.265	0.136	2.72718e-07	1
Tnrc6c	2.85739e-11	0.261236	0.351	0.194	2.9774e-07	1
Arhgap6	4.50822e-11	0.306375	0.261	0.133	4.69756e-07	1
Sptan1	5.12923e-11	0.312945	0.333	0.188	5.34466e-07	1
Prkcz	5.70609e-11	0.264824	0.268	0.136	5.94575e-07	1
Arhgef12	7.5283e-11	0.267558	0.5	0.307	7.84448e-07	1
Tbl1x	8.74505e-11	0.319923	0.258	0.135	9.11234e-07	1
Mbd5	1.45596e-10	0.264518	0.344	0.194	1.51711e-06	1
Dock1	2.61614e-10	0.264859	0.407	0.246	2.72602e-06	1
Fam193a	5.44009e-10	0.283601	0.254	0.135	5.66857e-06	1
Atp5a1	6.94655e-10	0.259903	0.307	0.175	7.2383e-06	1
Rbpms	7.48367e-10	0.291992	0.463	0.289	7.79799e-06	1
Fmnl2	1.52586e-09	0.32541	0.274	0.152	1.58995e-05	1
Atad2b	4.40588e-09	0.265701	0.281	0.158	4.59093e-05	1
Zmiz1	7.23901e-09	0.255122	0.326	0.195	7.54305e-05	1
Ggt1	2.16605e-19	0.679929	0.69	0.581	2.25702e-15	2
Ghr	3.80795e-19	0.640885	0.798	0.709	3.96789e-15	2
Acsm2	8.30416e-19	0.607448	0.776	0.68	8.65294e-15	2
Dab2	9.09749e-16	0.733937	0.734	0.639	9.47958e-12	2
Gm42397	2.02416e-14	0.739687	0.583	0.482	2.10917e-10	2
Abcc2	4.35098e-13	0.737257	0.568	0.485	4.53372e-09	2
Pde4d	1.23192e-11	0.458097	0.785	0.732	1.28367e-07	2
Slc34a1	1.72008e-11	0.403857	0.867	0.839	1.79233e-07	2
Zbtb20	4.39939e-10	0.338046	0.933	0.918	4.58417e-06	2
Trim7	6.43365e-10	0.715221	0.457	0.386	6.70386e-06	2
Slc27a2	2.76078e-09	0.536295	0.654	0.613	2.87673e-05	2
Slc25a21	3.2296e-08	0.678952	0.499	0.439	0.000336524	2
Snx29	3.25853e-08	0.594397	0.596	0.536	0.000339539	2
Them7	7.36865e-08	0.694762	0.395	0.314	0.000767814	2
Igf1r	1.51797e-07	0.434089	0.641	0.599	0.00158173	2
Lrp2	4.15372e-07	0.459043	0.61	0.567	0.00432818	2
Slc22a28	7.31965e-07	0.684384	0.393	0.342	0.00762708	2
Trabd2b	8.05693e-07	0.484152	0.597	0.548	0.00839532	2
Gramd1b	5.97082e-43	1.28197	0.7	0.299	6.2216e-39	3
Cyp7b1	9.42862e-36	1.73191	0.444	0.158	9.82462e-32	3
Ghr	1.84337e-35	0.989198	0.95	0.697	1.92079e-31	3
Zbtb20	1.10513e-31	0.619608	0.988	0.912	1.15155e-27	3
Pdzk1	6.39694e-28	0.789104	0.575	0.243	6.66561e-24	3
Hnf4aos	1.39361e-27	0.877998	0.588	0.264	1.45214e-23	3
Abcc2	1.95524e-27	0.88289	0.791	0.464	2.03736e-23	3
Snx29	3.58662e-27	0.676197	0.838	0.51	3.73725e-23	3
Slc25a21	6.00444e-27	0.732083	0.738	0.413	6.25663e-23	3
Igf1r	1.28901e-26	0.735526	0.85	0.576	1.34315e-22	3
Pdzrn3	1.16126e-25	0.813638	0.512	0.218	1.21004e-21	3
Thrb	1.28952e-25	0.877755	0.637	0.324	1.34368e-21	3
Rnf24	1.15143e-23	1.3928	0.338	0.126	1.1998e-19	3
Hnf4g	1.18579e-22	0.767058	0.328	0.114	1.23559e-18	3
Pde4d	1.46045e-22	0.57643	0.938	0.717	1.52179e-18	3
Col4a3	4.26025e-22	0.629041	0.803	0.504	4.43918e-18	3
Them7	1.02147e-21	0.652712	0.597	0.294	1.06437e-17	3
Trps1	1.03239e-21	0.668271	0.753	0.433	1.07575e-17	3
Fggy	1.44451e-21	0.656823	0.609	0.301	1.50518e-17	3
Fut9	1.99244e-21	0.665556	0.812	0.501	2.07613e-17	3
Osbpl3	3.81317e-21	0.685216	0.644	0.328	3.97333e-17	3
Itgb8	4.64523e-21	0.863971	0.341	0.127	4.84033e-17	3
Ctnna2	6.16861e-21	0.862986	0.288	0.099	6.42769e-17	3
Nrg1	1.04749e-20	0.823735	0.362	0.142	1.09149e-16	3
Slc47a1	1.12064e-20	0.642862	0.694	0.368	1.16771e-16	3
Nfia	1.39053e-20	0.593625	0.791	0.482	1.44893e-16	3
Cyp2j5	3.3269e-20	0.625864	0.641	0.334	3.46663e-16	3
Slc27a2	5.10162e-20	0.636516	0.841	0.592	5.31589e-16	3
Gm42397	9.82591e-20	0.633774	0.759	0.468	1.02386e-15	3
Fbp1	1.33722e-19	0.676129	0.316	0.116	1.39338e-15	3
Sugct	1.53767e-19	0.683126	0.597	0.314	1.60226e-15	3
Lactb2	2.42824e-19	0.570555	0.659	0.343	2.53023e-15	3
Ppara	2.46694e-19	0.598039	0.509	0.237	2.57055e-15	3
Fgf1	2.69673e-19	0.988156	0.584	0.334	2.81e-15	3
Atp11a	3.86481e-19	0.607819	0.8	0.509	4.02713e-15	3
Pter	1.00196e-18	0.786314	0.462	0.217	1.04405e-14	3
Osbpl8	1.22895e-18	0.683511	0.625	0.349	1.28057e-14	3
Arhgap42	1.2796e-18	0.619935	0.528	0.26	1.33334e-14	3
Erc2	1.95254e-18	0.671083	0.709	0.426	2.03455e-14	3
Esrrg	5.89487e-18	0.5055	0.912	0.685	6.14245e-14	3
Kcnk5	6.25815e-18	0.682606	0.509	0.257	6.52099e-14	3
Ddah1	8.20997e-18	0.620027	0.428	0.191	8.55479e-14	3
Fnip2	9.14564e-18	0.62559	0.456	0.216	9.52976e-14	3
Ntn1	9.90944e-18	0.720133	0.409	0.183	1.03256e-13	3
Gm37245	1.60465e-17	0.627543	0.281	0.102	1.67205e-13	3
Cryl1	1.69666e-17	0.712799	0.431	0.199	1.76792e-13	3
Nhs	2.46398e-17	0.600173	0.666	0.382	2.56747e-13	3
Itpr1	2.66033e-17	0.536711	0.825	0.552	2.77207e-13	3
Fam214a	1.34311e-16	0.581767	0.35	0.147	1.39952e-12	3
Rab11fip3	1.63438e-16	0.503048	0.791	0.502	1.70302e-12	3
Slc7a13	1.68028e-16	0.678771	0.531	0.279	1.75085e-12	3
Lrrk2	1.7738e-16	0.553053	0.569	0.298	1.8483e-12	3
Herc3	2.04401e-16	0.617856	0.338	0.142	2.12986e-12	3
Glis3	3.63546e-16	0.504962	0.769	0.463	3.78815e-12	3
Clybl	3.93721e-16	0.554262	0.378	0.166	4.10257e-12	3
Trabd2b	3.96383e-16	0.559545	0.784	0.528	4.13031e-12	3
AI314278	4.69129e-16	0.60585	0.325	0.135	4.88832e-12	3
Map7	5.00709e-16	0.588817	0.431	0.201	5.21739e-12	3
Chdh	5.64512e-16	0.612535	0.284	0.111	5.88221e-12	3
Cubn	6.52889e-16	0.528202	0.4	0.177	6.8031e-12	3
St8sia1	7.45283e-16	0.661358	0.341	0.147	7.76585e-12	3
Igsf11	8.92955e-16	0.686739	0.294	0.118	9.30459e-12	3
Hnf1b	1.20839e-15	0.57886	0.622	0.354	1.25915e-11	3
Eps8	1.24899e-15	0.550629	0.419	0.197	1.30145e-11	3
Acss2	1.29338e-15	0.646013	0.362	0.16	1.3477e-11	3
Acsm3	1.56913e-15	0.628682	0.341	0.146	1.63503e-11	3
Veph1	1.64035e-15	0.591618	0.388	0.175	1.70924e-11	3
Gcnt1	2.49823e-15	0.514434	0.559	0.292	2.60316e-11	3
Tet2	2.63409e-15	0.718475	0.434	0.212	2.74472e-11	3
Trim7	2.73887e-15	0.600986	0.65	0.367	2.85391e-11	3
Cmah	2.84915e-15	0.557257	0.294	0.119	2.96881e-11	3
A1cf	3.03484e-15	0.528401	0.284	0.112	3.16231e-11	3
Arid1b	3.60966e-15	0.489782	0.556	0.299	3.76126e-11	3
Slc17a1	4.37693e-15	0.562194	0.422	0.199	4.56077e-11	3
Frmd4b	5.04329e-15	0.575487	0.637	0.373	5.25511e-11	3
Auts2	6.44029e-15	0.467625	0.541	0.286	6.71078e-11	3
Gss	6.45518e-15	0.585299	0.3	0.126	6.72629e-11	3
Slc1a1	1.24029e-14	0.596907	0.406	0.199	1.29238e-10	3
Slco3a1	1.25228e-14	0.586207	0.559	0.321	1.30487e-10	3
Aass	1.31176e-14	0.575595	0.359	0.16	1.36685e-10	3
Dab2	1.36079e-14	0.527671	0.806	0.638	1.41794e-10	3
Galnt14	1.87803e-14	0.526494	0.453	0.226	1.9569e-10	3
Keg1	2.4454e-14	0.534234	0.806	0.533	2.54811e-10	3
Cyp2j11	2.99336e-14	0.554736	0.272	0.111	3.11908e-10	3
Ldc1	3.73419e-14	0.528008	0.459	0.235	3.89103e-10	3
Wwp1	4.66371e-14	0.642023	0.403	0.201	4.85959e-10	3
Pdzd2	4.75241e-14	0.530055	0.537	0.291	4.95201e-10	3
Pcsk5	5.60239e-14	0.586172	0.394	0.192	5.83769e-10	3
Nr1h4	5.94161e-14	0.523605	0.506	0.271	6.19116e-10	3
Prkn	7.2665e-14	0.481463	0.697	0.427	7.57169e-10	3
Aadat	9.2172e-14	0.845414	0.259	0.107	9.60432e-10	3
Gpc4	1.5857e-13	0.528889	0.512	0.285	1.6523e-09	3
Mtor	1.60714e-13	0.563704	0.353	0.169	1.67464e-09	3
Slc4a4	1.67703e-13	0.592943	0.697	0.461	1.74746e-09	3
Galnt18	1.99738e-13	0.613852	0.425	0.224	2.08127e-09	3
Mfsd4b5	2.64308e-13	0.507632	0.562	0.312	2.75409e-09	3
Slco1a6	2.72291e-13	0.547195	0.491	0.269	2.83727e-09	3
Tinag	3.0652e-13	0.534386	0.366	0.174	3.19393e-09	3
Glis1	3.16537e-13	0.466459	0.366	0.171	3.29831e-09	3
Plekha7	3.20092e-13	0.483933	0.456	0.234	3.33535e-09	3
Cmip	3.54996e-13	0.547104	0.653	0.408	3.69906e-09	3
Xylb	4.45771e-13	0.504303	0.356	0.166	4.64494e-09	3
Ptprk	4.82339e-13	0.473254	0.606	0.364	5.02597e-09	3
Bnc2	5.27794e-13	0.54876	0.469	0.254	5.49961e-09	3
Sipa1l1	5.32778e-13	0.485181	0.375	0.182	5.55155e-09	3
Arsb	9.07548e-13	0.597193	0.303	0.137	9.45665e-09	3
Cldn10	1.18471e-12	0.419058	0.375	0.179	1.23447e-08	3
Slc9a8	1.30982e-12	0.645434	0.381	0.195	1.36484e-08	3
Nceh1	1.31803e-12	0.638105	0.388	0.197	1.37339e-08	3
Vti1a	1.71722e-12	0.476937	0.569	0.339	1.78934e-08	3
BC035947	1.86177e-12	0.675901	0.259	0.112	1.93996e-08	3
Myo5b	2.05138e-12	0.476793	0.388	0.193	2.13754e-08	3
Fah	2.63964e-12	0.451191	0.519	0.286	2.75051e-08	3
Sh3rf1	2.99085e-12	0.443217	0.556	0.319	3.11646e-08	3
Xylt1	3.60398e-12	0.553266	0.338	0.163	3.75535e-08	3
Bach2	4.13537e-12	0.562036	0.319	0.153	4.30905e-08	3
Kcnj15	4.36337e-12	0.444528	0.647	0.387	4.54663e-08	3
Eif4g3	5.55578e-12	0.465679	0.528	0.302	5.78913e-08	3
BC005561	6.01077e-12	0.51211	0.316	0.149	6.26322e-08	3
Rbm47	6.36944e-12	0.431059	0.613	0.362	6.63695e-08	3
Msra	6.38263e-12	0.469841	0.475	0.257	6.6507e-08	3
Slc16a12	8.50795e-12	0.515377	0.259	0.113	8.86529e-08	3
B4galt5	8.59853e-12	0.461057	0.353	0.176	8.95967e-08	3
Tpk1	8.71442e-12	0.426804	0.359	0.178	9.08043e-08	3
Pank1	9.5814e-12	0.424319	0.459	0.244	9.98381e-08	3
Itgb6	1.05925e-11	0.434641	0.572	0.339	1.10374e-07	3
Slc16a2	1.13049e-11	0.52322	0.291	0.135	1.17797e-07	3
Mob3b	1.20283e-11	0.477608	0.375	0.187	1.25335e-07	3
Slc25a13	1.21758e-11	0.438995	0.309	0.144	1.26872e-07	3
Dennd1a	1.37752e-11	0.422008	0.622	0.388	1.43538e-07	3
Tns1	1.6044e-11	0.390691	0.812	0.608	1.67178e-07	3
Gcnt2	1.63814e-11	0.504553	0.322	0.158	1.70694e-07	3
Ldlrad4	1.85611e-11	0.459781	0.484	0.272	1.93406e-07	3
Mep1a	1.9131e-11	0.497363	0.347	0.172	1.99345e-07	3
Gm45792	1.94572e-11	0.555245	0.297	0.14	2.02744e-07	3
Oxr1	2.10012e-11	0.501064	0.541	0.324	2.18833e-07	3
Gas2	2.27821e-11	0.382608	0.441	0.237	2.37389e-07	3
Pecr	2.36783e-11	0.430106	0.447	0.238	2.46728e-07	3
Aldh8a1	2.72696e-11	0.469293	0.25	0.108	2.84149e-07	3
Igsf5	3.23344e-11	0.484896	0.328	0.161	3.36924e-07	3
Rufy3	3.58723e-11	0.413537	0.431	0.227	3.73789e-07	3
Trappc9	4.05545e-11	0.491672	0.375	0.194	4.22578e-07	3
Bcl7a	4.07553e-11	0.428838	0.294	0.137	4.2467e-07	3
Osbpl9	4.33283e-11	0.419293	0.431	0.237	4.5148e-07	3
Smarca2	4.54639e-11	0.381992	0.706	0.466	4.73733e-07	3
Folr1	5.36643e-11	0.389967	0.372	0.185	5.59182e-07	3
Gpr137b	6.28736e-11	0.433683	0.269	0.122	6.55143e-07	3
Dpyd	6.56783e-11	0.553963	0.378	0.199	6.84368e-07	3
Rgl1	6.7538e-11	0.394514	0.559	0.33	7.03746e-07	3
Cyp2j13	8.36375e-11	0.436124	0.6	0.372	8.71503e-07	3
Pard3	1.03335e-10	0.296381	0.484	0.261	1.07675e-06	3
Lrp2	1.04245e-10	0.384285	0.809	0.545	1.08624e-06	3
Slc13a1	1.148e-10	0.445509	0.5	0.287	1.19622e-06	3
Golga4	1.1674e-10	0.4978	0.422	0.234	1.21643e-06	3
Atp6v0a4	1.22958e-10	0.396186	0.419	0.224	1.28122e-06	3
Fam133b	1.28601e-10	0.470204	0.278	0.132	1.34002e-06	3
Ggt1	1.48273e-10	0.386137	0.809	0.576	1.545e-06	3
Tnfrsf21	1.53599e-10	0.473201	0.319	0.158	1.6005e-06	3
Atrnl1	1.56196e-10	0.358272	0.547	0.32	1.62756e-06	3
Gk	1.56706e-10	0.509798	0.534	0.332	1.63287e-06	3
Nedd4l	1.79979e-10	0.379975	0.641	0.385	1.87538e-06	3
Aspa	1.82024e-10	0.563945	0.394	0.212	1.89669e-06	3
Adhfe1	2.14428e-10	0.46518	0.3	0.147	2.23434e-06	3
Irak2	2.15905e-10	0.623516	0.253	0.119	2.24973e-06	3
Aoah	2.36763e-10	0.497598	0.362	0.191	2.46707e-06	3
Fhit	2.53137e-10	0.419815	0.684	0.438	2.63768e-06	3
Ptk2b	2.64777e-10	0.463378	0.278	0.133	2.75897e-06	3
Ankib1	2.8862e-10	0.508698	0.409	0.23	3.00742e-06	3
Kifc3	3.01022e-10	0.445922	0.325	0.165	3.13665e-06	3
Srr	3.25146e-10	0.417278	0.319	0.158	3.38802e-06	3
Patj	4.0843e-10	0.349147	0.391	0.207	4.25584e-06	3
Vwa8	4.11663e-10	0.424545	0.484	0.278	4.28953e-06	3
Sh3d19	4.16383e-10	0.462226	0.409	0.227	4.33871e-06	3
Cux1	4.33055e-10	0.368724	0.556	0.329	4.51244e-06	3
Slc6a6	4.58148e-10	0.541779	0.409	0.233	4.7739e-06	3
Clmn	5.54271e-10	0.438859	0.344	0.176	5.7755e-06	3
Sord	6.00508e-10	0.368615	0.459	0.256	6.25729e-06	3
Adk	6.2825e-10	0.387739	0.447	0.245	6.54636e-06	3
Slc7a7	6.36485e-10	0.505956	0.266	0.128	6.63217e-06	3
Slc17a3	6.45439e-10	0.332901	0.591	0.351	6.72547e-06	3
Rere	6.81362e-10	0.434695	0.662	0.443	7.09979e-06	3
Slc18a1	6.8343e-10	0.377295	0.447	0.254	7.12134e-06	3
Egfr	6.83562e-10	0.424026	0.334	0.173	7.12272e-06	3
Akap13	7.50627e-10	0.416691	0.466	0.275	7.82153e-06	3
Slc22a30	8.64688e-10	0.343143	0.6	0.362	9.01005e-06	3
Slc6a18	9.1721e-10	0.544863	0.603	0.394	9.55733e-06	3
Hykk	1.10517e-09	0.325617	0.362	0.186	1.15158e-05	3
Epb41	1.1208e-09	0.356068	0.534	0.318	1.16787e-05	3
Stxbp5l	1.12735e-09	0.316126	0.272	0.129	1.1747e-05	3
Prpf38b	1.31466e-09	0.420619	0.262	0.127	1.36988e-05	3
Ror1	1.41401e-09	0.400164	0.422	0.234	1.4734e-05	3
Acot12	1.50545e-09	0.374396	0.312	0.158	1.56868e-05	3
2210408F21Rik	1.60029e-09	0.415459	0.406	0.228	1.66751e-05	3
Hnf4a	1.62458e-09	0.413632	0.409	0.226	1.69281e-05	3
Me1	1.99474e-09	0.344605	0.288	0.14	2.07852e-05	3
Zfp697	2.15192e-09	0.417904	0.278	0.138	2.2423e-05	3
Pah	2.43242e-09	0.429897	0.369	0.205	2.53458e-05	3
Slc22a28	2.44808e-09	0.338185	0.553	0.325	2.5509e-05	3
Pepd	2.64793e-09	0.351298	0.269	0.131	2.75914e-05	3
Mapt	2.79553e-09	0.285301	0.55	0.324	2.91294e-05	3
Pipox	2.99324e-09	0.356867	0.253	0.12	3.11896e-05	3
Osbpl6	3.13298e-09	0.349812	0.547	0.334	3.26457e-05	3
Arhgap10	3.22243e-09	0.370947	0.409	0.229	3.35778e-05	3
Met	3.3505e-09	0.331665	0.391	0.213	3.49122e-05	3
Errfi1	3.36768e-09	0.369404	0.472	0.274	3.50912e-05	3
Nhsl2	3.89837e-09	0.460514	0.262	0.131	4.0621e-05	3
Nox4	4.14888e-09	0.53148	0.353	0.193	4.32314e-05	3
Snhg11	4.79845e-09	0.456706	0.406	0.234	4.99999e-05	3
Pam	4.88055e-09	0.286629	0.425	0.239	5.08553e-05	3
Chd3	4.93895e-09	0.39023	0.469	0.277	5.14638e-05	3
Larp4b	5.42478e-09	0.378524	0.453	0.27	5.65262e-05	3
Acsm2	5.53082e-09	0.297843	0.881	0.675	5.76311e-05	3
Kcnj16	5.89578e-09	0.327064	0.453	0.259	6.1434e-05	3
Mthfd1	6.26441e-09	0.348758	0.253	0.123	6.52752e-05	3
Hsd3b2	6.46303e-09	0.354077	0.372	0.204	6.73448e-05	3
Ddi2	8.02809e-09	0.370935	0.309	0.163	8.36526e-05	3
Etv6	8.05282e-09	0.507475	0.444	0.272	8.39104e-05	3
Rhobtb1	8.30474e-09	0.487242	0.478	0.303	8.65354e-05	3
Macrod2	8.33577e-09	0.323769	0.512	0.313	8.68587e-05	3
Fras1	9.02021e-09	0.272786	0.316	0.162	9.39906e-05	3
Fbxl17	9.10259e-09	0.382819	0.497	0.303	9.4849e-05	3
Mtus1	9.15702e-09	0.35394	0.397	0.23	9.54162e-05	3
Ndrg1	9.76784e-09	0.361105	0.747	0.541	0.000101781	3
Cers6	1.03735e-08	0.465402	0.316	0.17	0.000108092	3
Hnf1aos1	1.1323e-08	0.422809	0.456	0.274	0.000117986	3
Gbf1	1.17649e-08	0.332271	0.334	0.182	0.00012259	3
Mlxipl	1.21905e-08	0.350334	0.481	0.281	0.000127025	3
Plekha5	1.27379e-08	0.338061	0.325	0.172	0.000132729	3
Rabgap1l	1.36503e-08	0.365013	0.406	0.237	0.000142236	3
Ar	1.44097e-08	0.375339	0.259	0.132	0.000150149	3
Chst11	1.50738e-08	0.37542	0.319	0.172	0.000157069	3
Acox1	1.57212e-08	0.312863	0.497	0.294	0.000163815	3
AC149090.1	1.58606e-08	0.30868	0.512	0.312	0.000165267	3
Slc6a20b	1.61578e-08	0.40436	0.331	0.18	0.000168365	3
Map2k5	1.63454e-08	0.465369	0.312	0.171	0.000170319	3
Wwc1	1.87805e-08	0.326803	0.456	0.268	0.000195693	3
Cradd	1.91945e-08	0.36031	0.25	0.125	0.000200007	3
Ugt1a-all	2.03013e-08	0.295411	0.25	0.124	0.000211539	3
Pax8	2.1429e-08	0.303441	0.369	0.202	0.00022329	3
Acat1	2.17167e-08	0.432218	0.284	0.15	0.000226288	3
Rnf169	2.34476e-08	0.314693	0.391	0.222	0.000244324	3
Ugt8a	2.47028e-08	0.342872	0.272	0.139	0.000257404	3
Ldlrad3	2.5209e-08	0.449135	0.316	0.172	0.000262678	3
Dock9	2.64575e-08	0.475925	0.344	0.197	0.000275687	3
Gclc	2.74344e-08	0.412286	0.331	0.183	0.000285866	3
Hps5	2.9255e-08	0.30226	0.269	0.136	0.000304837	3
Tead1	3.00453e-08	0.356556	0.488	0.301	0.000313072	3
Ptprd	3.34202e-08	0.329149	0.65	0.429	0.000348239	3
Abcg2	3.4152e-08	0.38021	0.303	0.166	0.000355864	3
Usp15	3.58414e-08	0.395356	0.25	0.128	0.000373468	3
Nt5c2	3.82251e-08	0.38822	0.269	0.14	0.000398306	3
Por	4.11081e-08	0.451372	0.284	0.152	0.000428346	3
Ndel1	4.1654e-08	0.409759	0.275	0.147	0.000434034	3
Myo6	5.42367e-08	0.29643	0.597	0.387	0.000565147	3
Syne2	5.93576e-08	0.291701	0.697	0.462	0.000618506	3
Rab3ip	6.08393e-08	0.391483	0.359	0.205	0.000633945	3
Slc22a18	6.47012e-08	0.313274	0.403	0.232	0.000674186	3
Kansl1l	6.64588e-08	0.350144	0.419	0.252	0.000692501	3
Pcx	6.84408e-08	0.331884	0.272	0.142	0.000713153	3
Glyat	6.86009e-08	0.369091	0.434	0.262	0.000714821	3
Exoc6	7.05972e-08	0.364593	0.306	0.168	0.000735622	3
Slc12a6	7.7046e-08	0.324922	0.322	0.178	0.00080282	3
Lrrc8d	7.71547e-08	0.324777	0.284	0.152	0.000803952	3
Nlrp6	8.05451e-08	0.313564	0.281	0.146	0.00083928	3
Pkp4	8.84832e-08	0.268796	0.597	0.374	0.000921995	3
Slc30a9	9.6077e-08	0.332364	0.278	0.148	0.00100112	3
Ccser1	1.13251e-07	0.51491	0.331	0.194	0.00118008	3
Galnt11	1.13348e-07	0.264256	0.288	0.153	0.00118108	3
Crebrf	1.30292e-07	0.412192	0.262	0.143	0.00135765	3
Chpt1	1.37744e-07	0.268744	0.669	0.456	0.00143529	3
Mpp6	1.40517e-07	0.371657	0.259	0.137	0.00146419	3
Nsd1	1.43361e-07	0.360221	0.391	0.235	0.00149382	3
Ass1	1.56992e-07	0.286924	0.453	0.273	0.00163586	3
Cobll1	1.61125e-07	0.309988	0.412	0.248	0.00167892	3
Gng12	1.68674e-07	0.300764	0.419	0.253	0.00175758	3
Pawr	1.71534e-07	0.313268	0.319	0.175	0.00178738	3
Kyat1	1.79502e-07	0.298834	0.25	0.129	0.00187041	3
Nuak2	2.09208e-07	0.350523	0.294	0.163	0.00217994	3
Shank2	2.11598e-07	0.302908	0.438	0.266	0.00220485	3
Dleu2	2.23009e-07	0.338099	0.325	0.187	0.00232375	3
Vps13d	2.45061e-07	0.382429	0.328	0.192	0.00255353	3
Lrmda	2.53967e-07	0.280928	0.578	0.38	0.00264633	3
Tef	2.67189e-07	0.342458	0.353	0.204	0.00278411	3
Lgr4	2.77251e-07	0.253496	0.359	0.206	0.00288896	3
Manba	2.99053e-07	0.256468	0.312	0.172	0.00311614	3
Stard10	3.0755e-07	0.289924	0.325	0.182	0.00320468	3
Srek1	3.1833e-07	0.368703	0.394	0.236	0.003317	3
Sox6	3.25635e-07	0.300165	0.441	0.268	0.00339311	3
Vdr	4.63603e-07	0.264898	0.341	0.195	0.00483075	3
Gpatch8	4.66361e-07	0.381879	0.288	0.161	0.00485949	3
Dao	5.26655e-07	0.315844	0.372	0.22	0.00548774	3
Ap3b1	5.30092e-07	0.400101	0.259	0.142	0.00552356	3
Fut8	5.35235e-07	0.30427	0.303	0.173	0.00557714	3
Csgalnact1	6.48878e-07	0.290611	0.334	0.195	0.00676131	3
Fmn1	6.48902e-07	0.253871	0.406	0.246	0.00676156	3
Cd52	3.18367e-178	3.56688	0.426	0.008	3.31739e-174	4
Rps21	1.13822e-141	3.64561	0.875	0.123	1.18603e-137	4
Rps28	2.10691e-140	4.01527	0.779	0.091	2.1954e-136	4
Rps23	6.60362e-140	3.56379	0.809	0.1	6.88097e-136	4
Rpl39	2.66834e-139	4.05118	0.772	0.091	2.78041e-135	4
Tmsb4x	2.13173e-136	4.50048	0.912	0.151	2.22126e-132	4
Rpl35a	4.39242e-128	3.5791	0.801	0.111	4.5769e-124	4
Wfdc17	5.51442e-128	2.94224	0.25	0.002	5.74602e-124	4
Rps18	5.65629e-128	3.45185	0.779	0.101	5.89385e-124	4
Rps27	1.17665e-122	3.79963	0.838	0.133	1.22607e-118	4
Rps9	1.91377e-122	3.23628	0.794	0.113	1.99415e-118	4
Tyrobp	4.36187e-122	3.17294	0.301	0.006	4.54507e-118	4
Rpl27a	1.94738e-121	3.41164	0.816	0.122	2.02917e-117	4
Rpl23	1.81498e-120	3.39677	0.868	0.151	1.89121e-116	4
Rps3	3.8162e-120	3.11688	0.728	0.09	3.97648e-116	4
Rps3a1	3.17679e-119	3.27603	0.728	0.093	3.31021e-115	4
Rps29	7.94537e-119	3.92898	0.875	0.166	8.27907e-115	4
[truncated: 1,859 more rows]

## Sheet: Cluster Genes - SSHTN
Table S6	Cluster marker genes by adjusted p-value for each cluster in the SSHTN sample
[truncated: 5,275 more rows]

[truncated: 23 more sheets: Cluster Genes - SSCtrl, Top 200 Variable Genes, Cluster Genes - All LECs, Cluster Genes - HTN LECs, Cluster Genes - Ctrl LECs, Cluster Genes - A2HTN LECs, Cluster Genes - SSHTN LECs, DE Genes - HTN vs Ctrl LECs, DEG - A2HTN vs Ctrl LECs, DEG - SSHTN vs Ctrl LECs, DEG - A2HTN vs SSHTN LECs, GSEA - HTN vs Ctrl LECs - M2, GSEA - HTN vs Ctrl LECs - M5, GSEA - A2HTN vs Ctrl LECs - M2, GSEA - A2HTN vs Ctrl LECs - M5, GSEA - SSHTN vs Ctrl LECs - M2, GSEA - SSHTN vs Ctrl LECs - M5, GSEA - A2HTN vs SSHTN LECs - M2, GSEA - A2HTN vs SSHTN LECs - M5, RSS HTN vs Ctrl LECs …]
